# Supplementary material for: The Acyl-Proteome of Syntrophus aciditrophicus Reveals Metabolic Relationships in Benzoate Degradation
Source: PubMed Central journal article supplement — Mol Cell Proteomics. 2022 Feb 19;21(4):100215. doi: 10.1016/j.mcpro.2022.100215 (PMC8942843; doi:10.1016/j.mcpro.2022.100215), 2022-02-19

## Table of Contents

|                        |     |
|------------------------|-----|
| Acetyl .....           | 2   |
| Benzoyl.....           | 103 |
| Butyryl.....           | 105 |
| Crotonyl.....          | 108 |
| Glutaryl.....          | 110 |
| 3-Hydroxybutyryl ..... | 116 |
| 3-Hydroxypimelyl ..... | 122 |

Acetyl

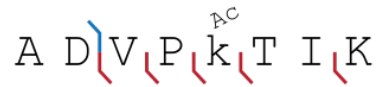

Precursor m/z: 457.2713

Charge: +2

6-hydroxycyclohex-1-ene-1-carboxyl-CoA dehydrogenase (Q2LXU3)

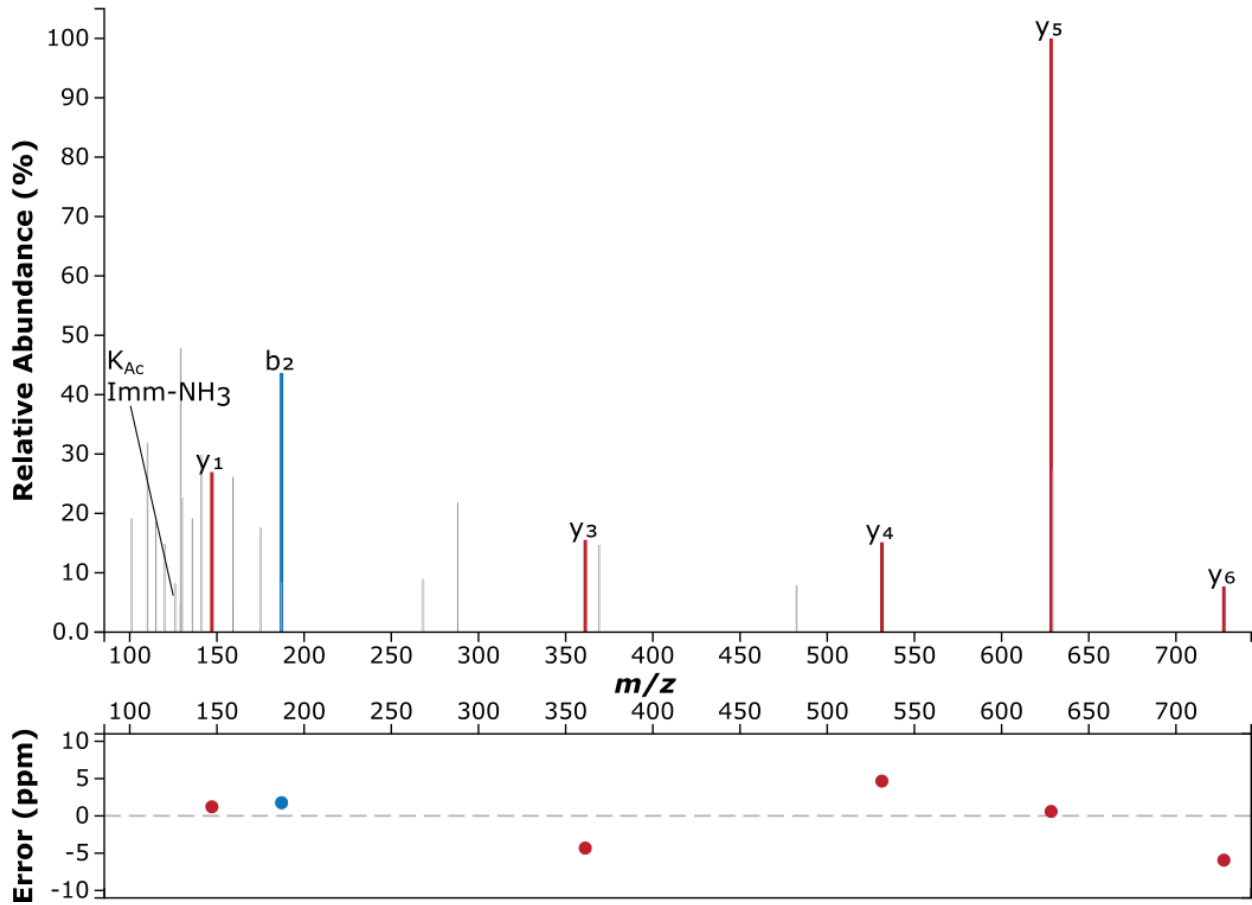

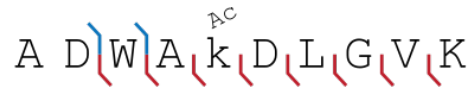

Precursor m/z: 572.8035 Charge: +2

Iron-sulphur-binding reductase (Q2LWR1)

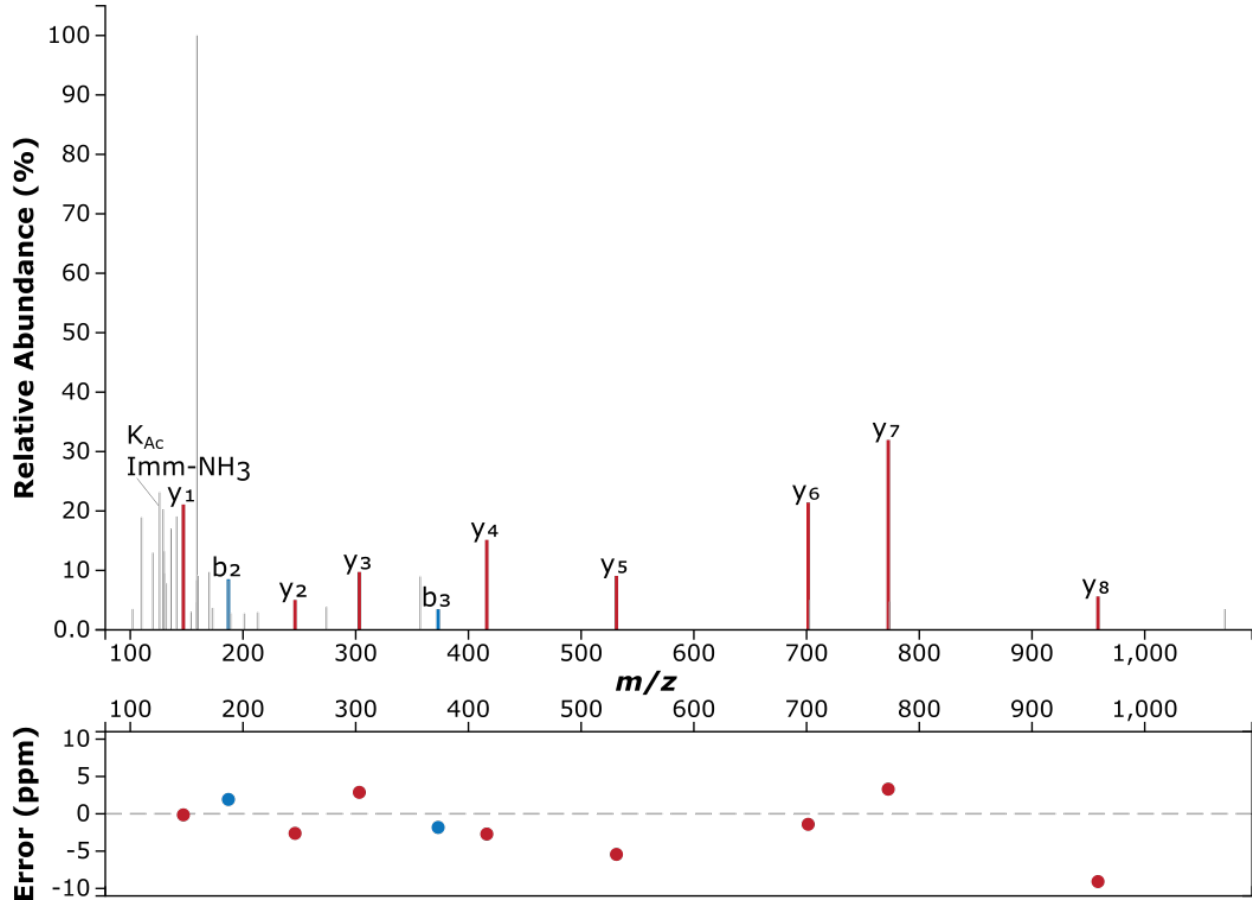

A E A E k T I Q T A V D N F G R

Precursor m/z: 597.9672  
3-oxoacyl-reductase (Q2LXS6)

Charge: +3

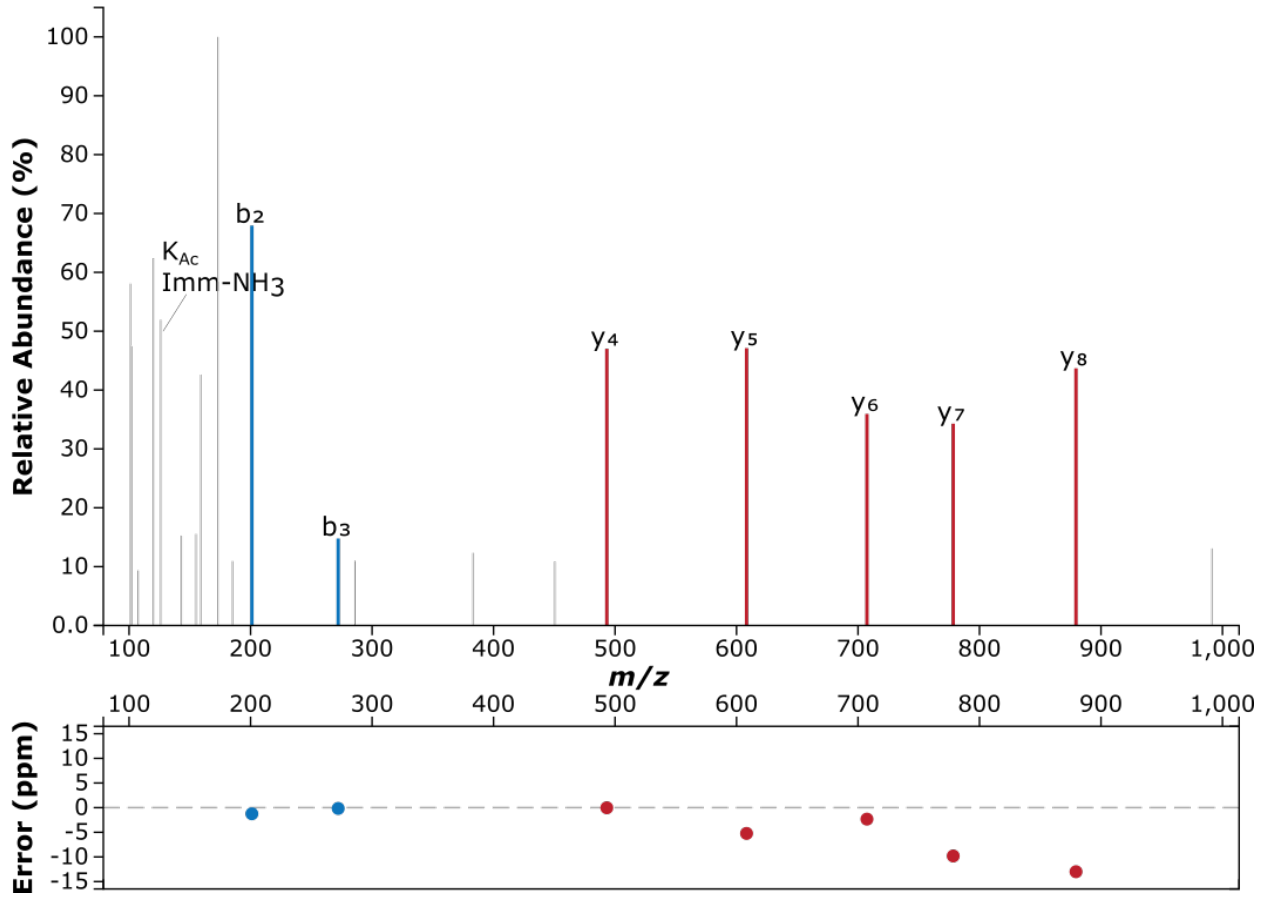

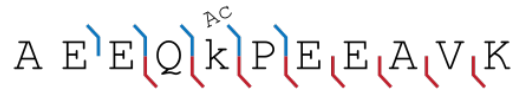

Precursor m/z: 650.3250

Charge: +2

Hypothetical exported protein (Q2LUP5)

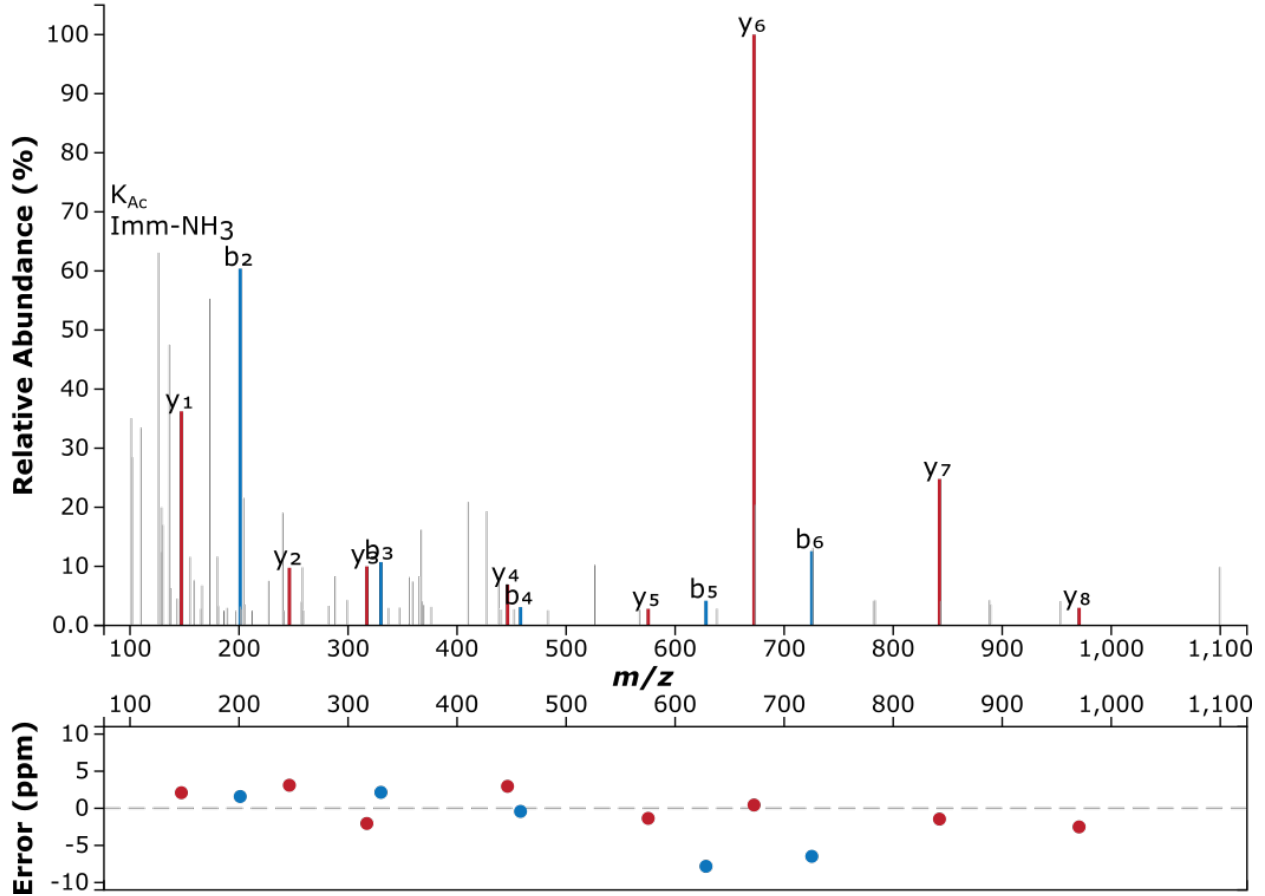

A F<sup>1</sup>V<sup>1</sup>V L N Q G F A Q<sub>1</sub>S<sub>1</sub>P E<sub>1</sub>L E<sup>AC</sup> k E L<sub>1</sub>K

Precursor m/z: 763.7423

Charge: +3

4-hydroxybenzoate-CoA ligase / benzoate-CoA ligase (Q2LRH0)

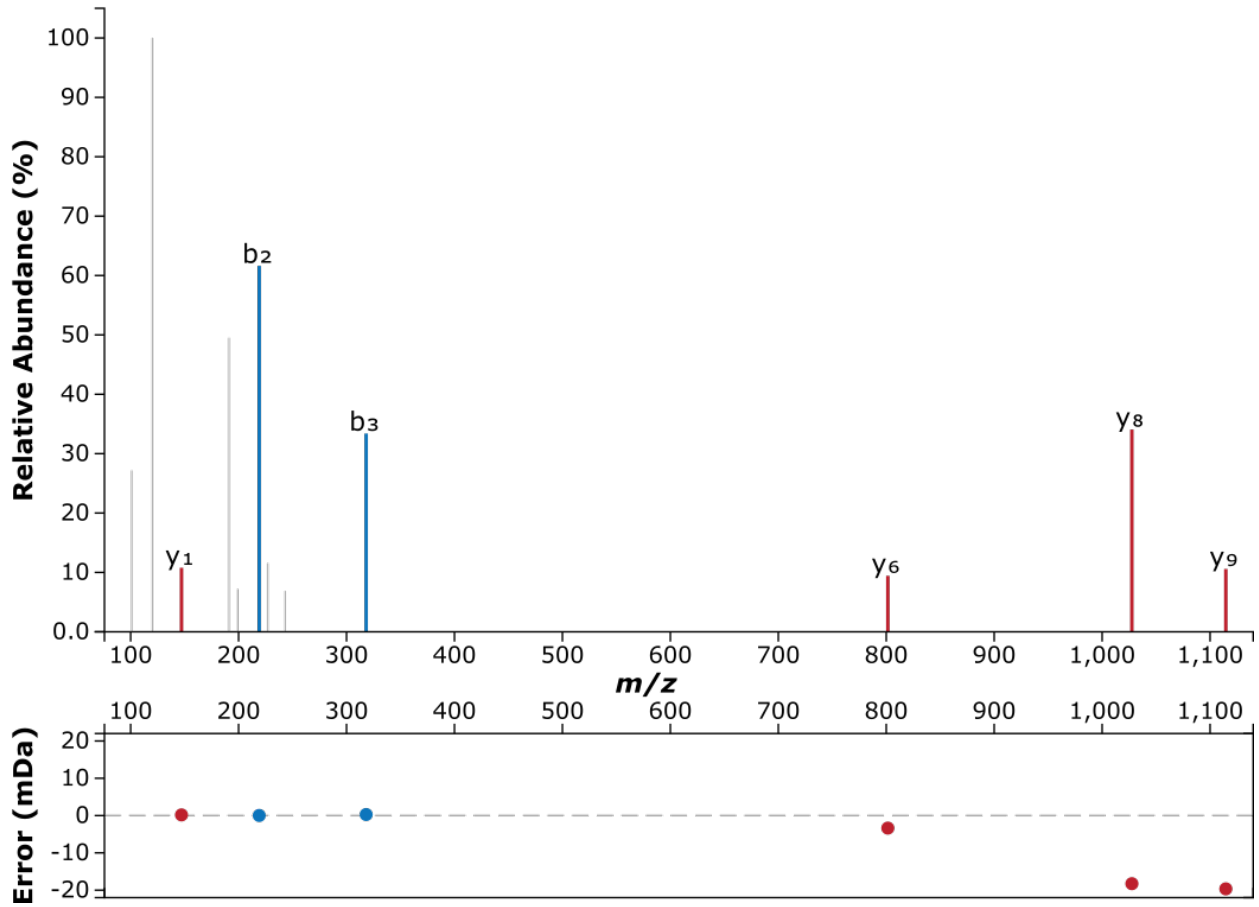

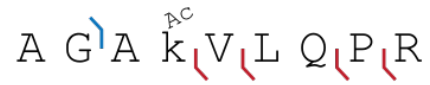

Precursor m/z: 491.2956  
Aspartokinase (Q2LTK0)

Charge: +2

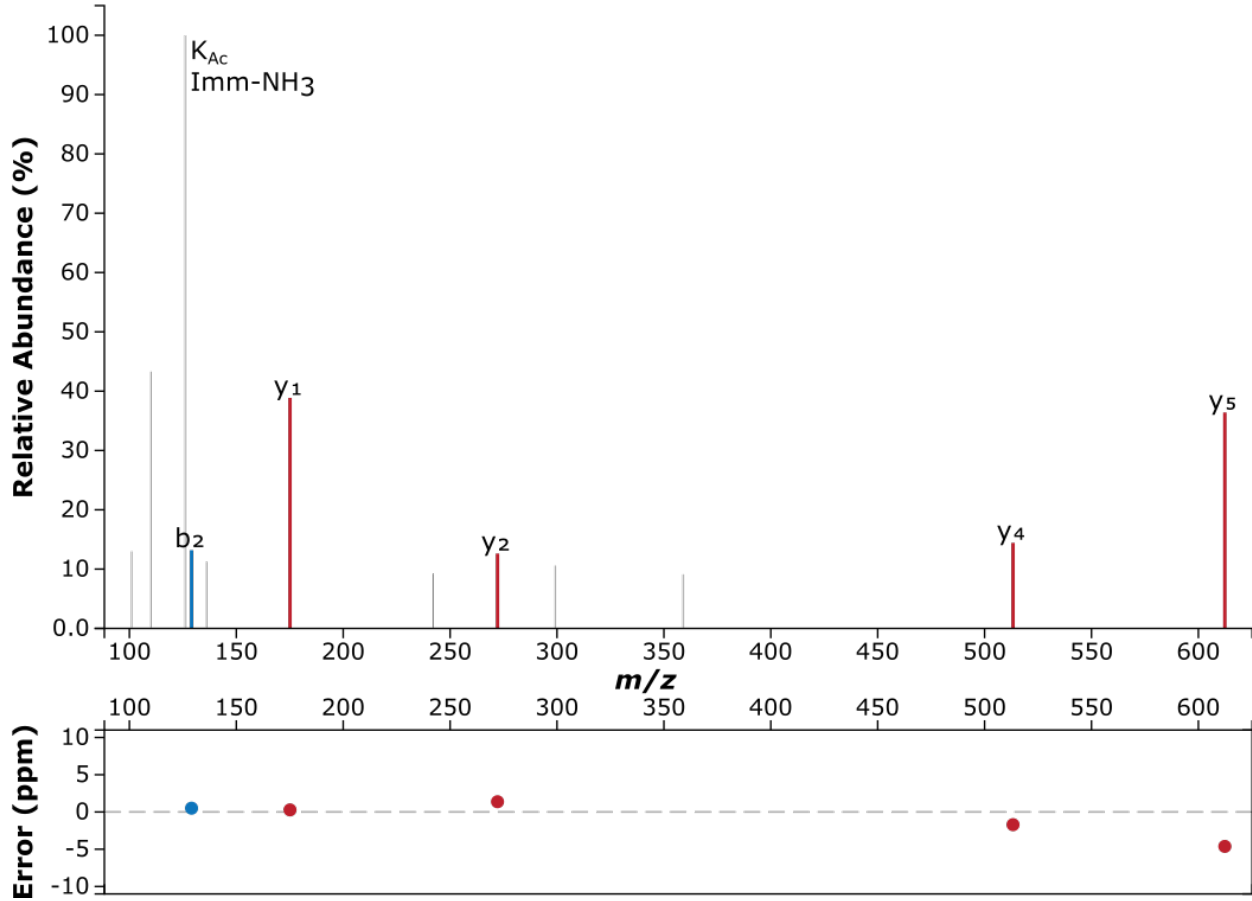

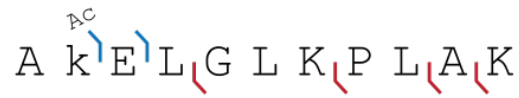

Precursor m/z: 403.9237 Charge: +3  
 Acetyl-CoA acetyltransferase (Q2LWQ5)

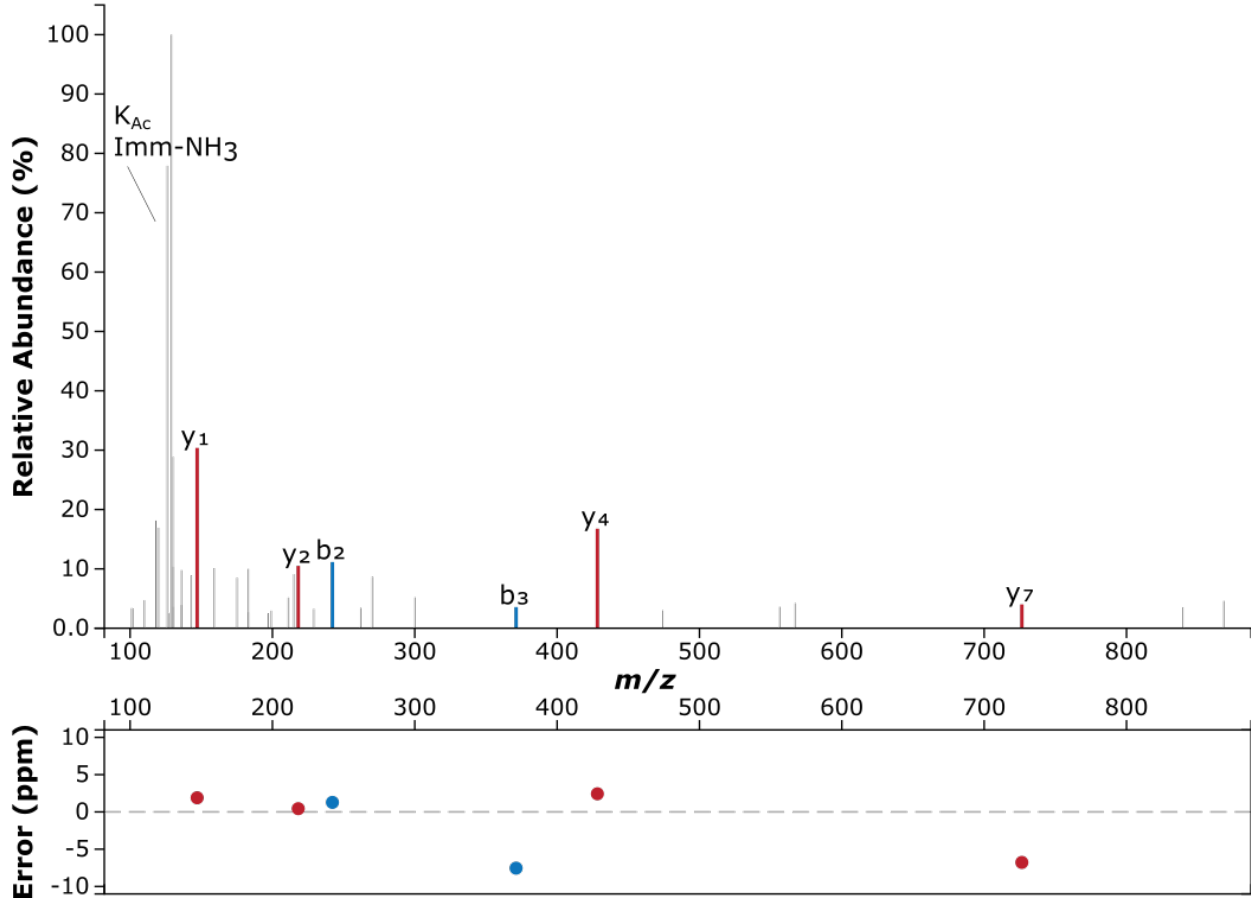



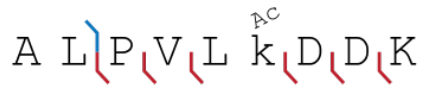

Precursor m/z: 520.8029

Charge: +2

6-oxocyclohex-1-ene-1-carboxyl-CoA hydrolase (Q2LXU2)

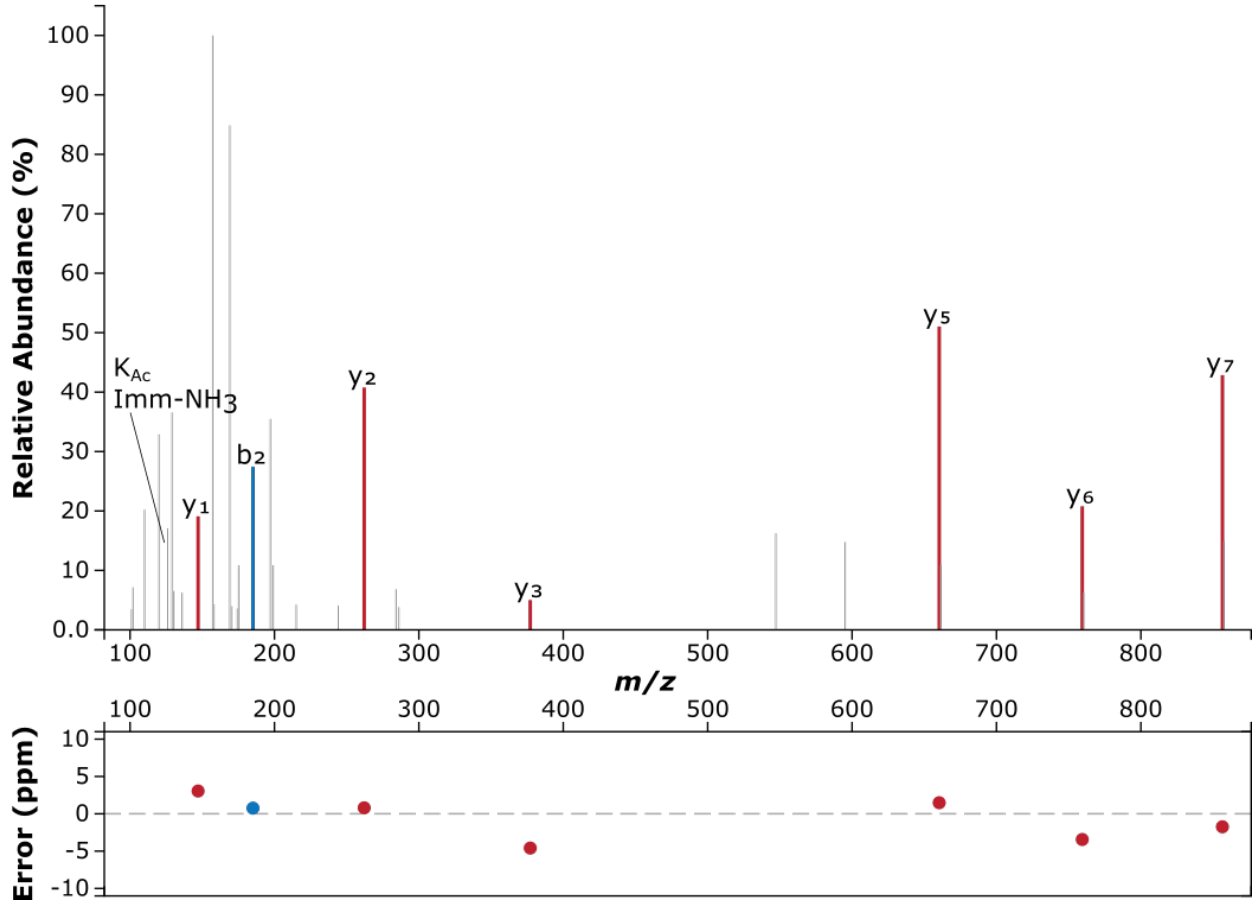

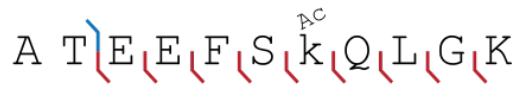

Precursor m/z: 640.3301 Charge: +2

3-hydroxyacyl-CoA dehydrogenase (Q2LUN4)

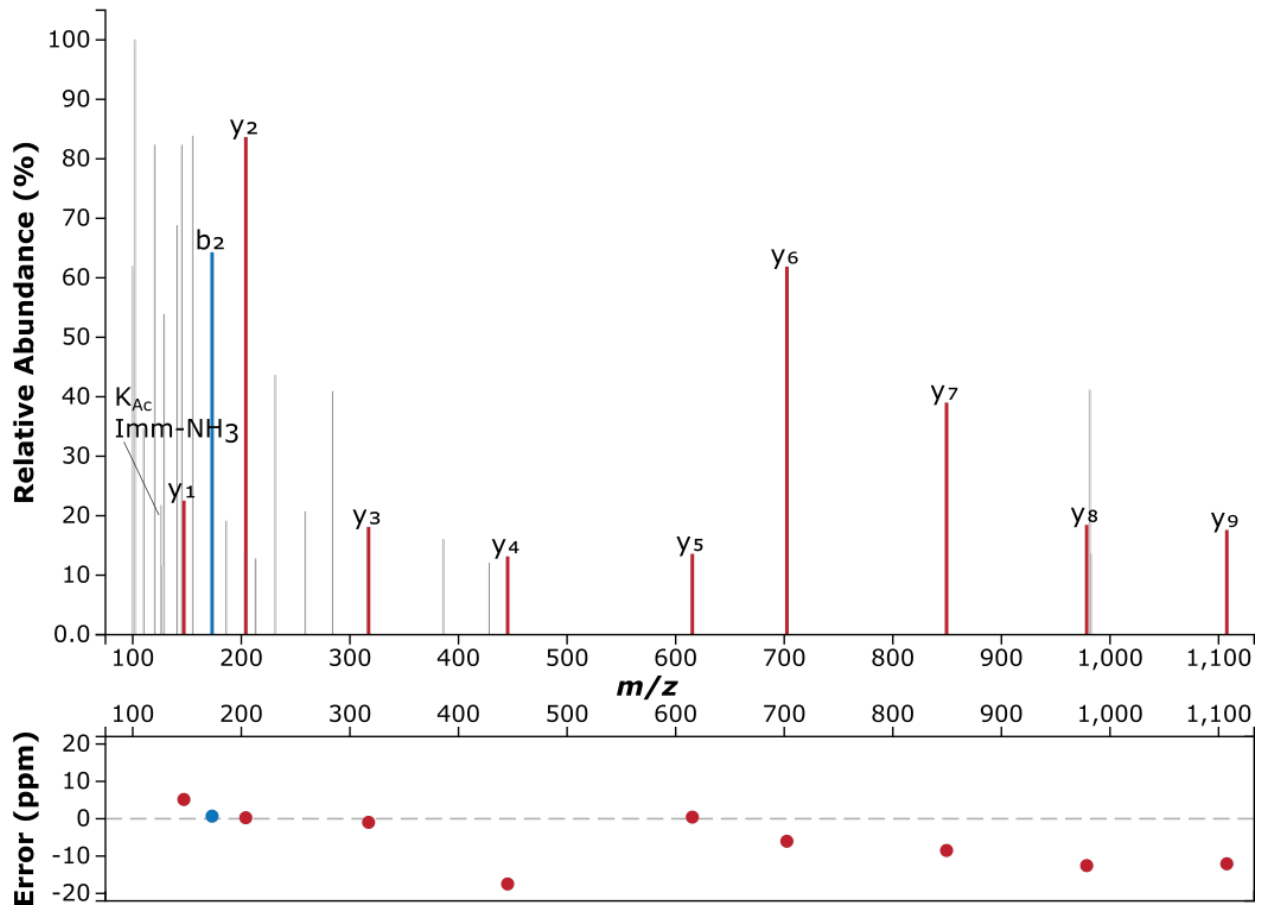

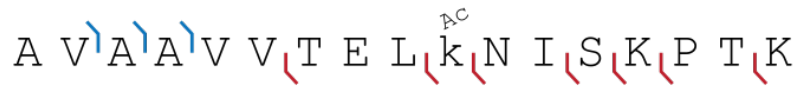

Precursor m/z: 604.3594

Charge: +3

60 kDa chaperonin 2 (Q2LTG7)

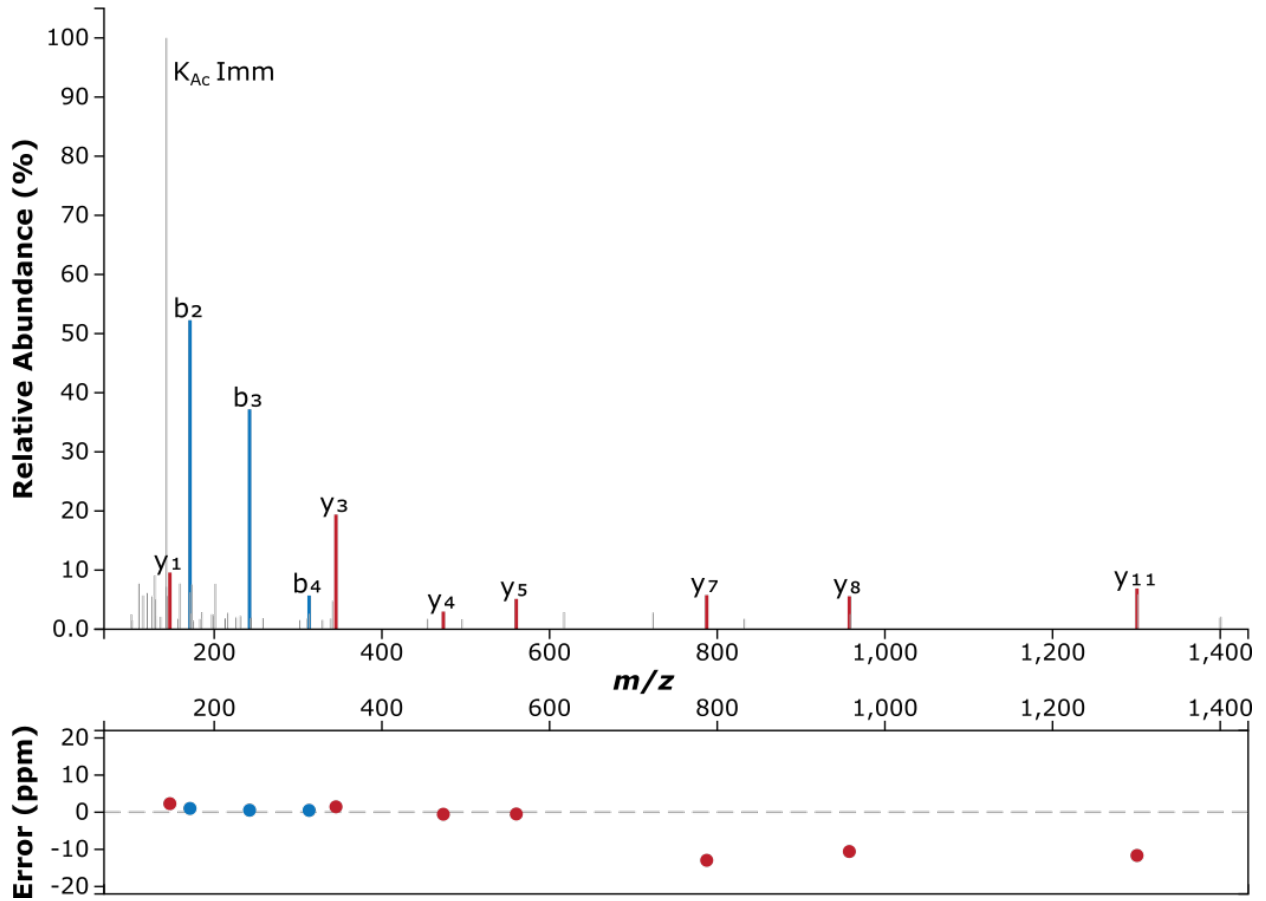

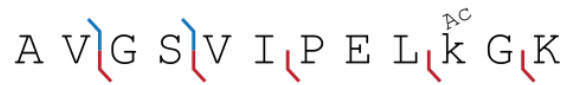

Precursor m/z: 620.3690

Charge: +2

Glyceraldehyde-3-phosphate dehydrogenase (Q2LWW2)

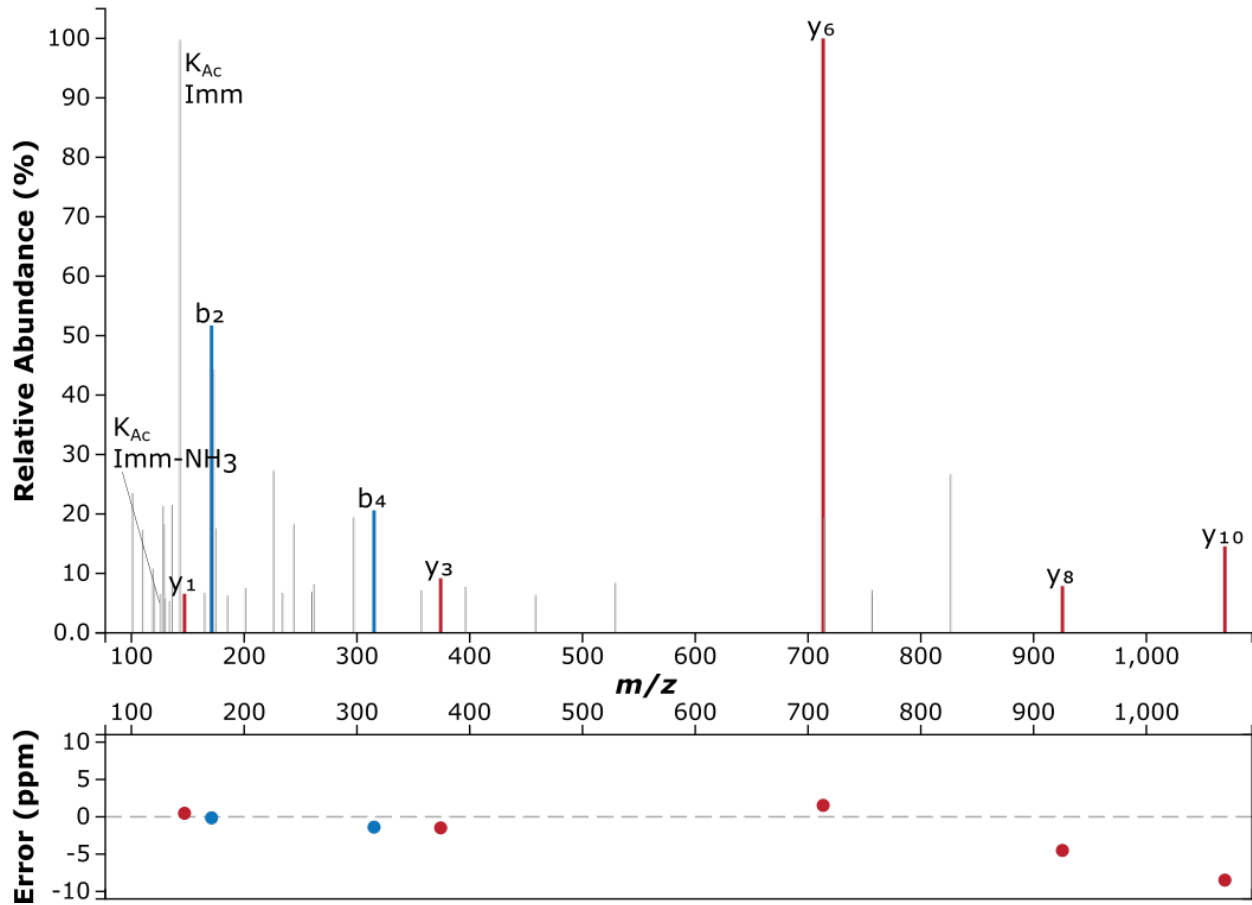

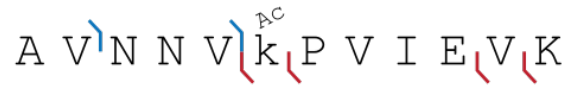

Precursor m/z: 676.4008 Charge: +2

30S ribosomal protein S7 (Q2LQA4)

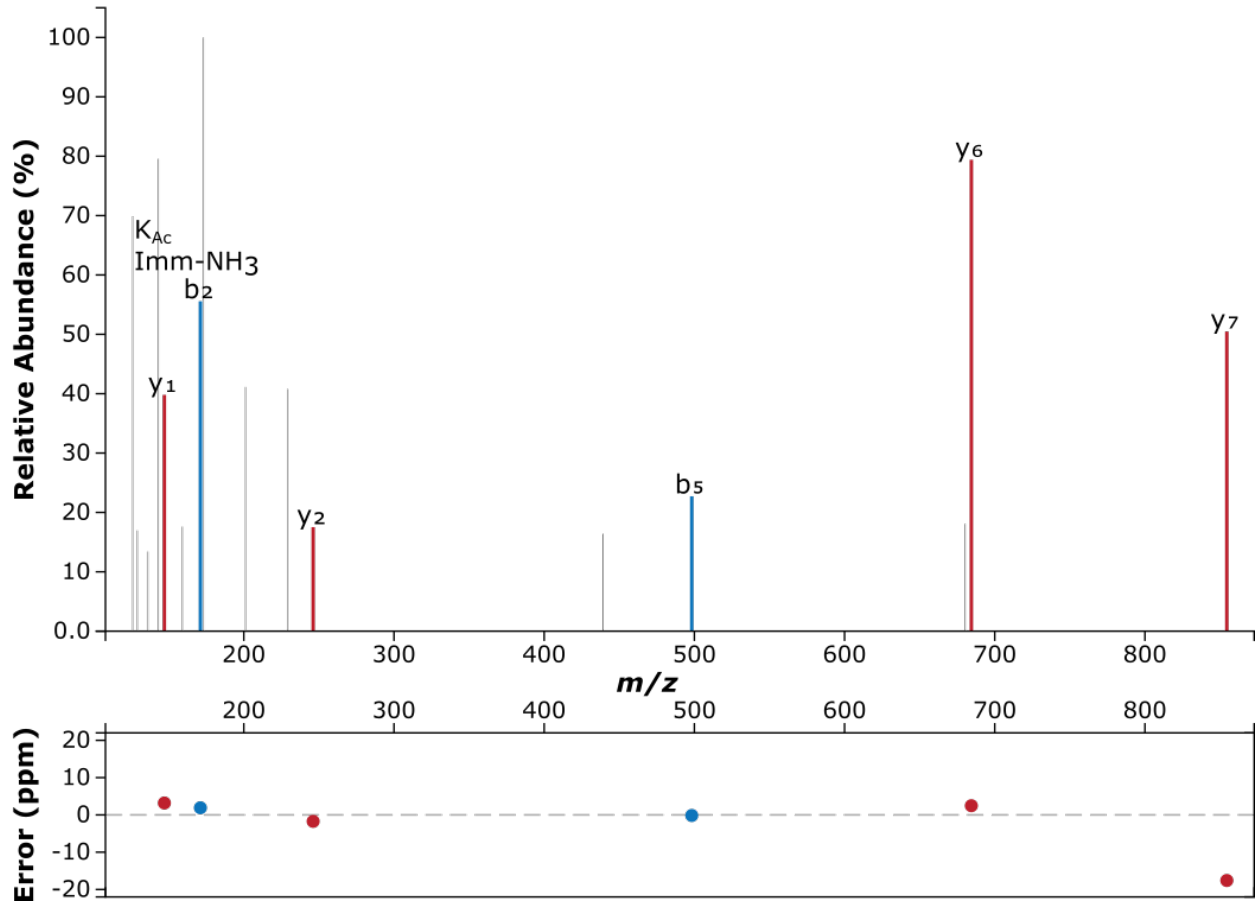

D D <sup>AC</sup>k | G | N | W | V | R

Precursor m/z: 516.2489

Charge: +2

6-oxocyclohex-1-ene-1-carboxyl-CoA hydrolase (Q2LXU2)

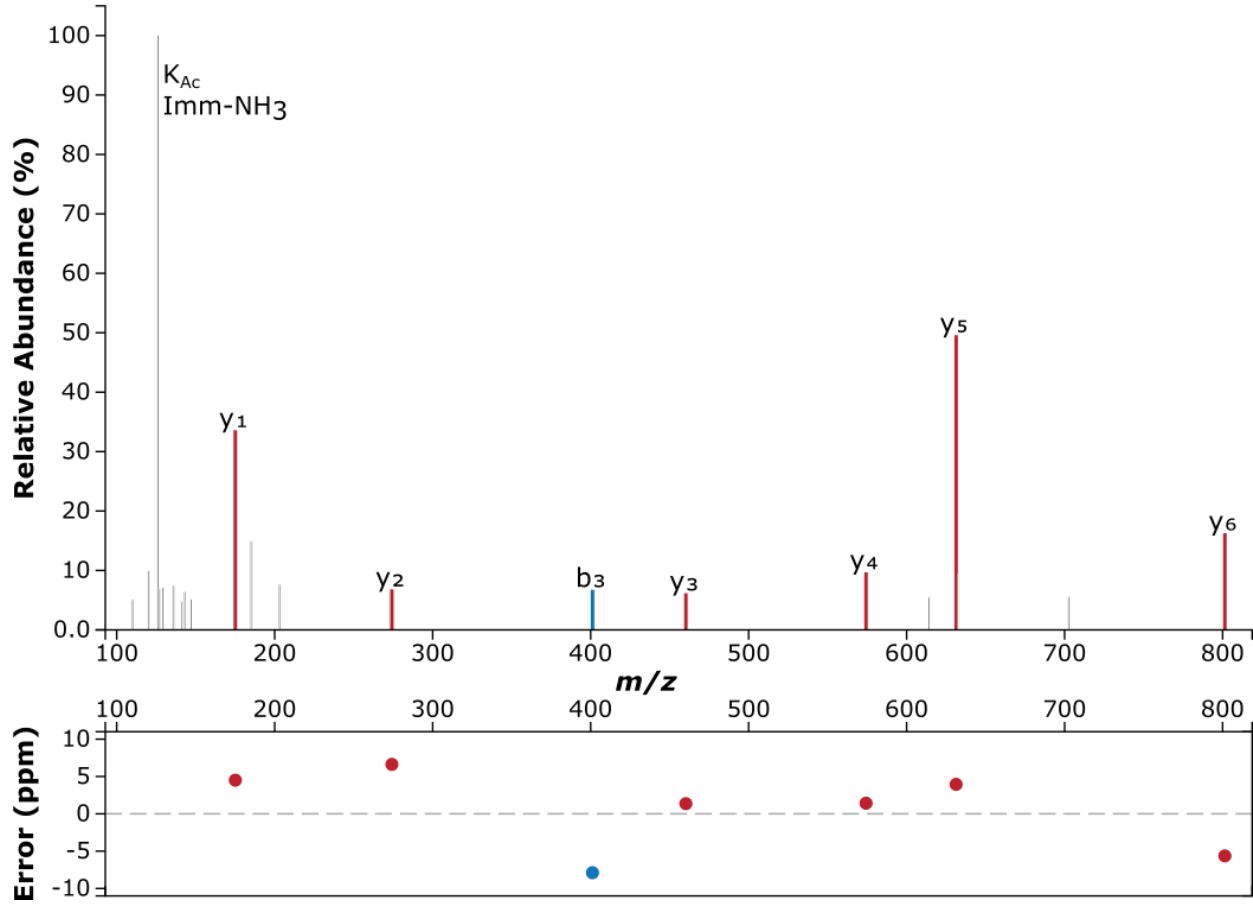

D G E I V Y G E P <sup>AC</sup> k T G E E A K

Precursor m/z: 882.4203

Charge: +2

6-oxocyclohex-1-ene-1-carbonyl-CoA hydrolase (Q2LXU2)

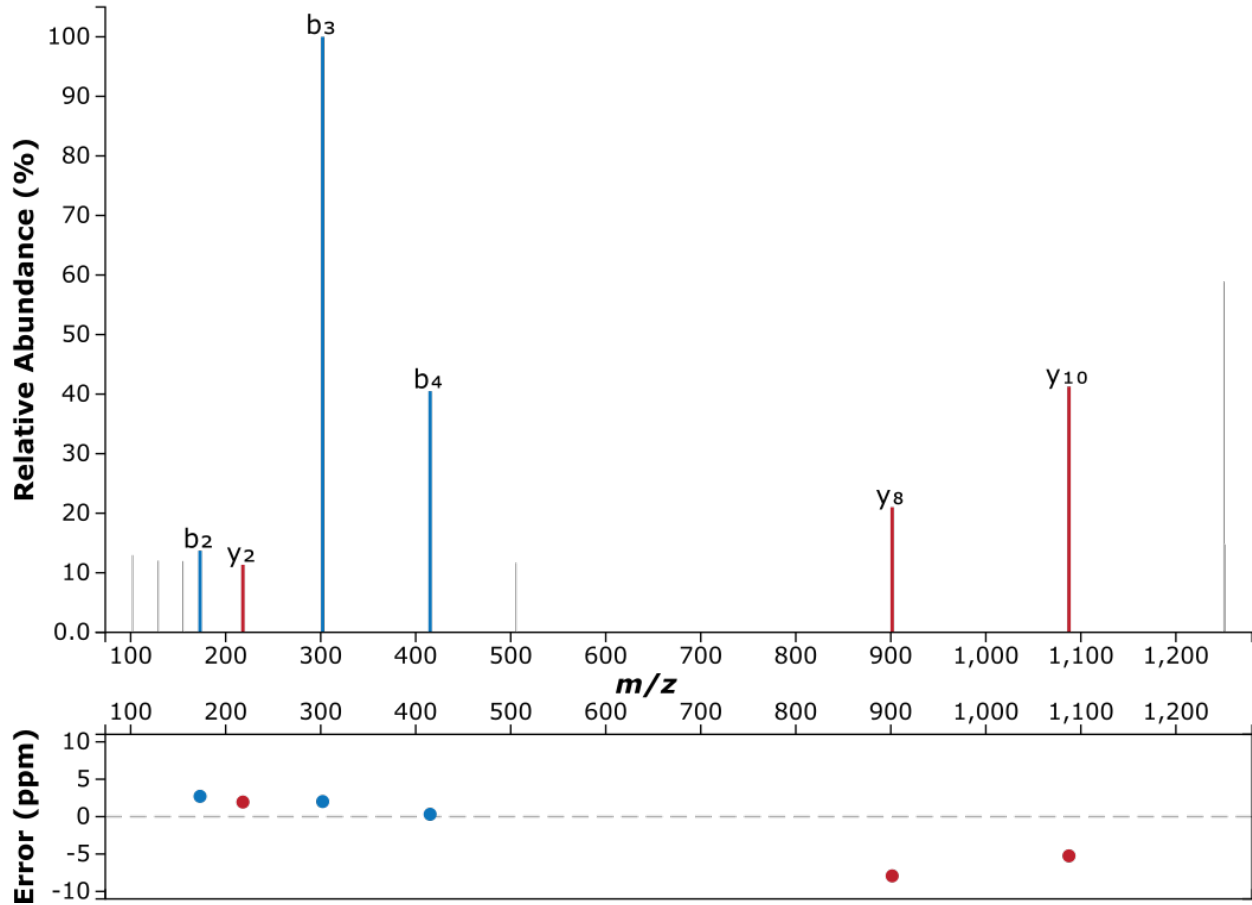

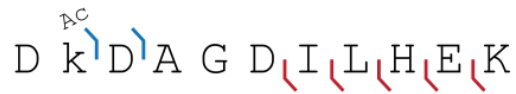

Precursor m/z: 428.2140 Charge: +3  
 Xaa-pro aminopeptidase (Q2LRF2)

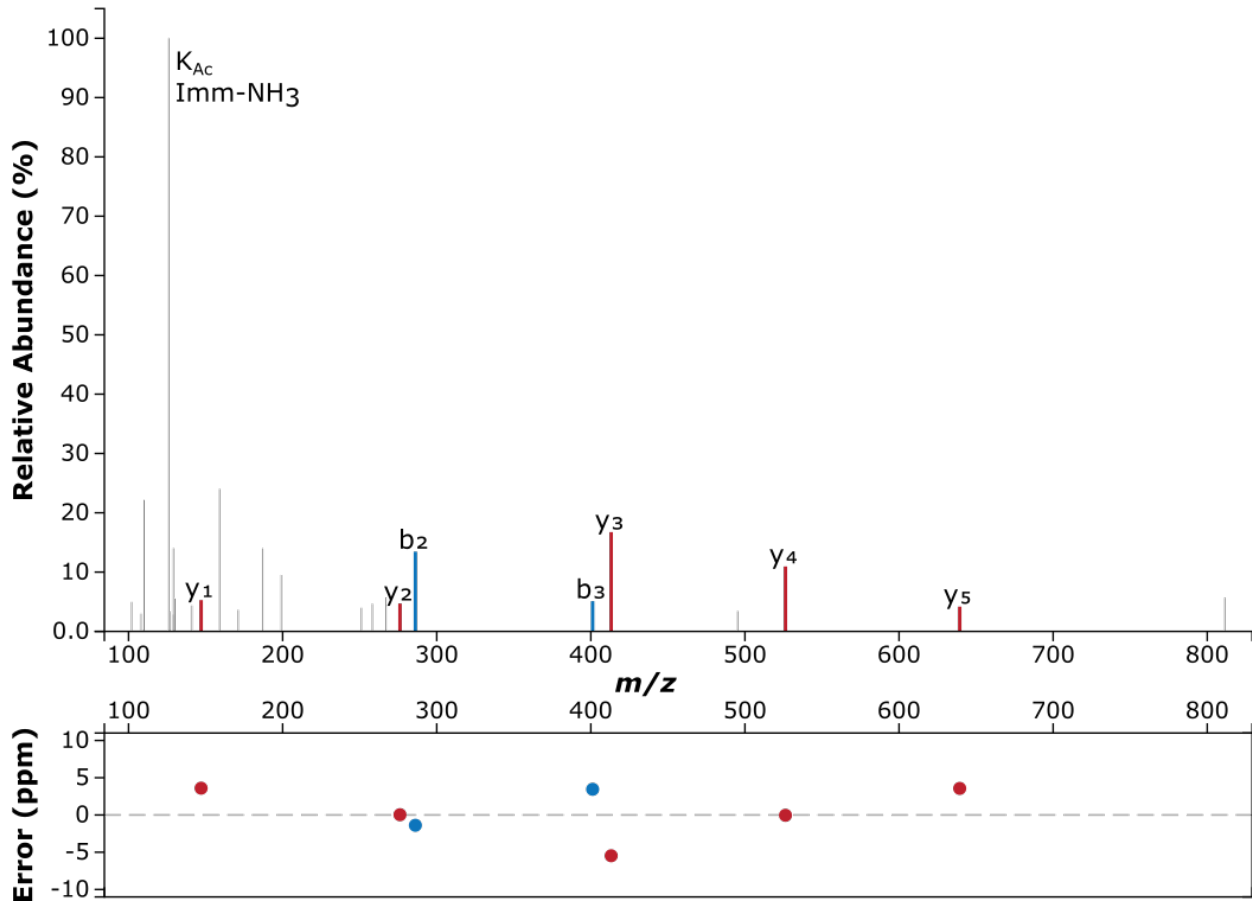



D <sup>13</sup>C T A A T V I G E W V N S G D K

Precursor m/z: 916.9549

Charge: +2

4-hydroxybenzoate-CoA ligase / benzoate-CoA ligase (Q2LRH0)

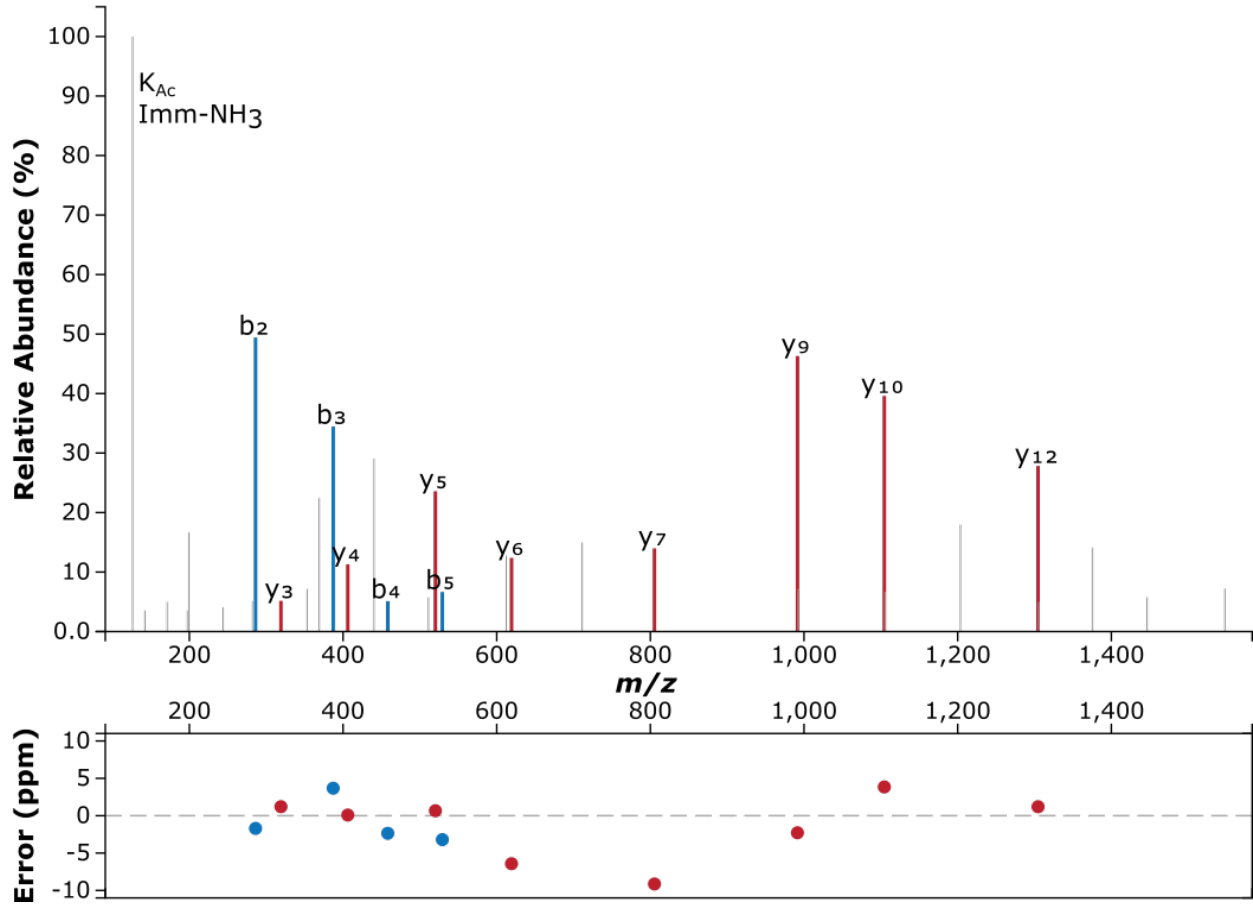

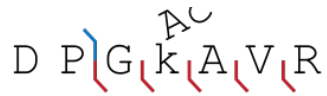

Precursor m/z: 392.7192

Charge: +2

Ion-translocating oxidoreductase complex subunit B (Q2LPK2)

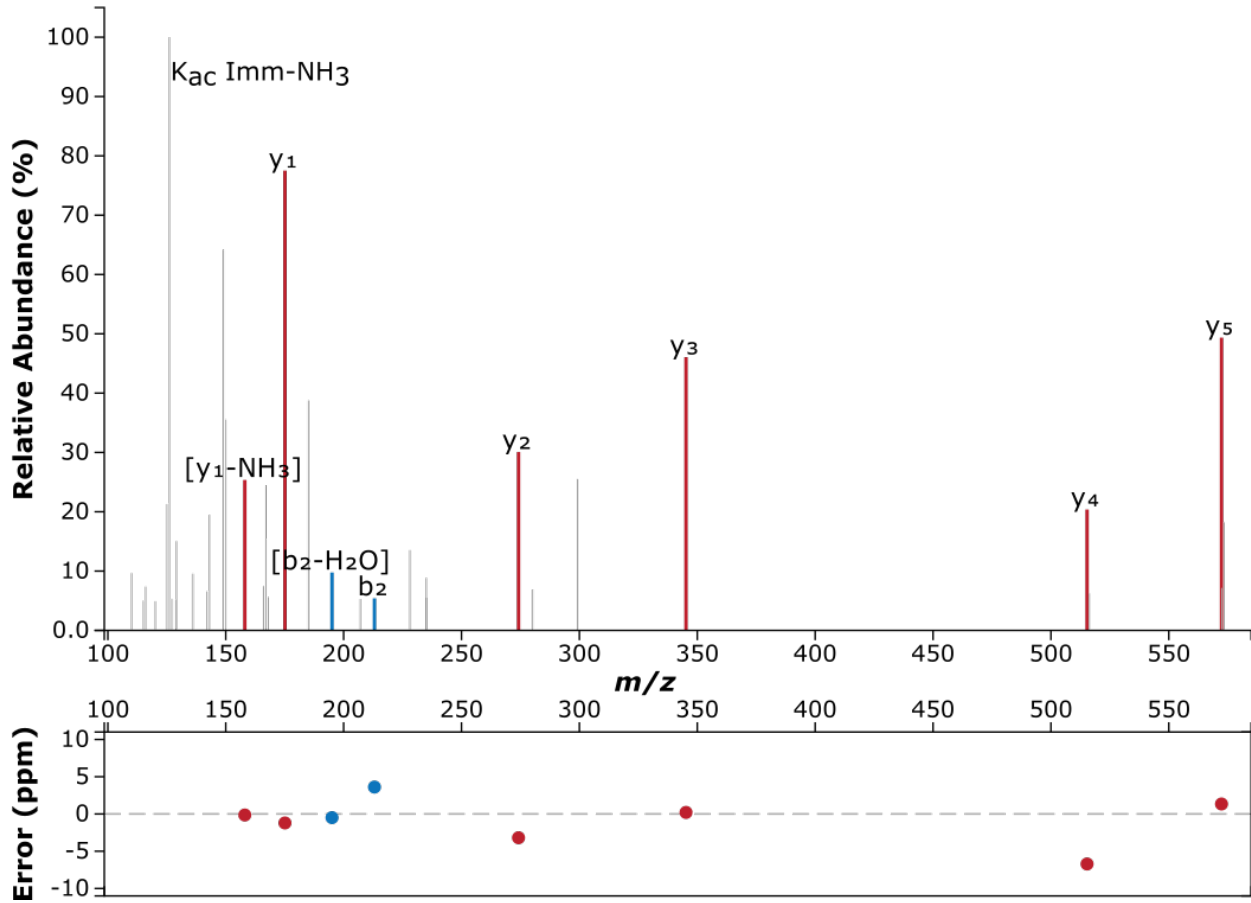

D T I D F I k N R

Precursor m/z: 582.3064

Charge: +2

6-oxocyclohex-1-ene-1-carboxyl-CoA hydrolase (Q2LXU2)

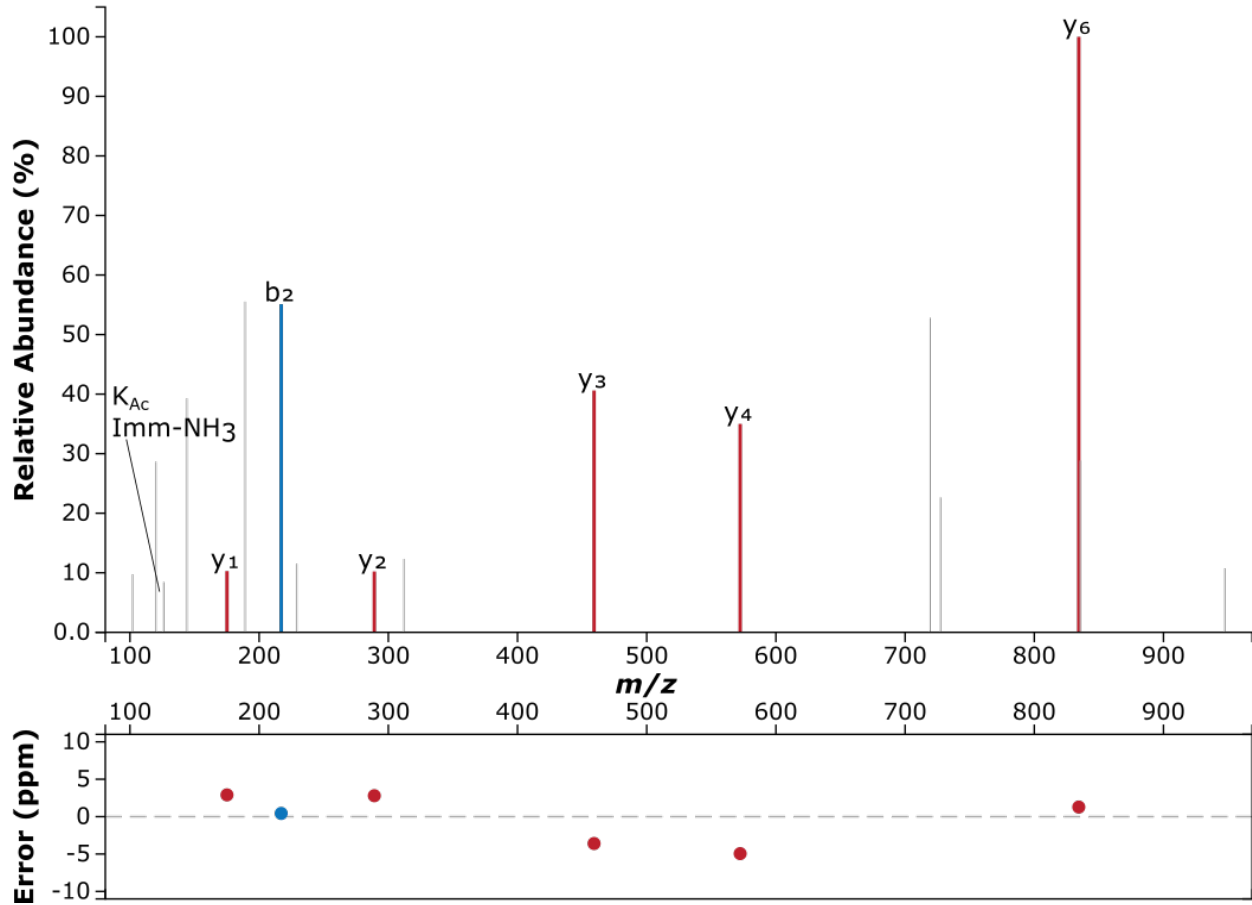

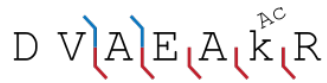

Precursor m/z: 415.7220

Charge: +2

ATP synthase subunit b (Q2LR00)

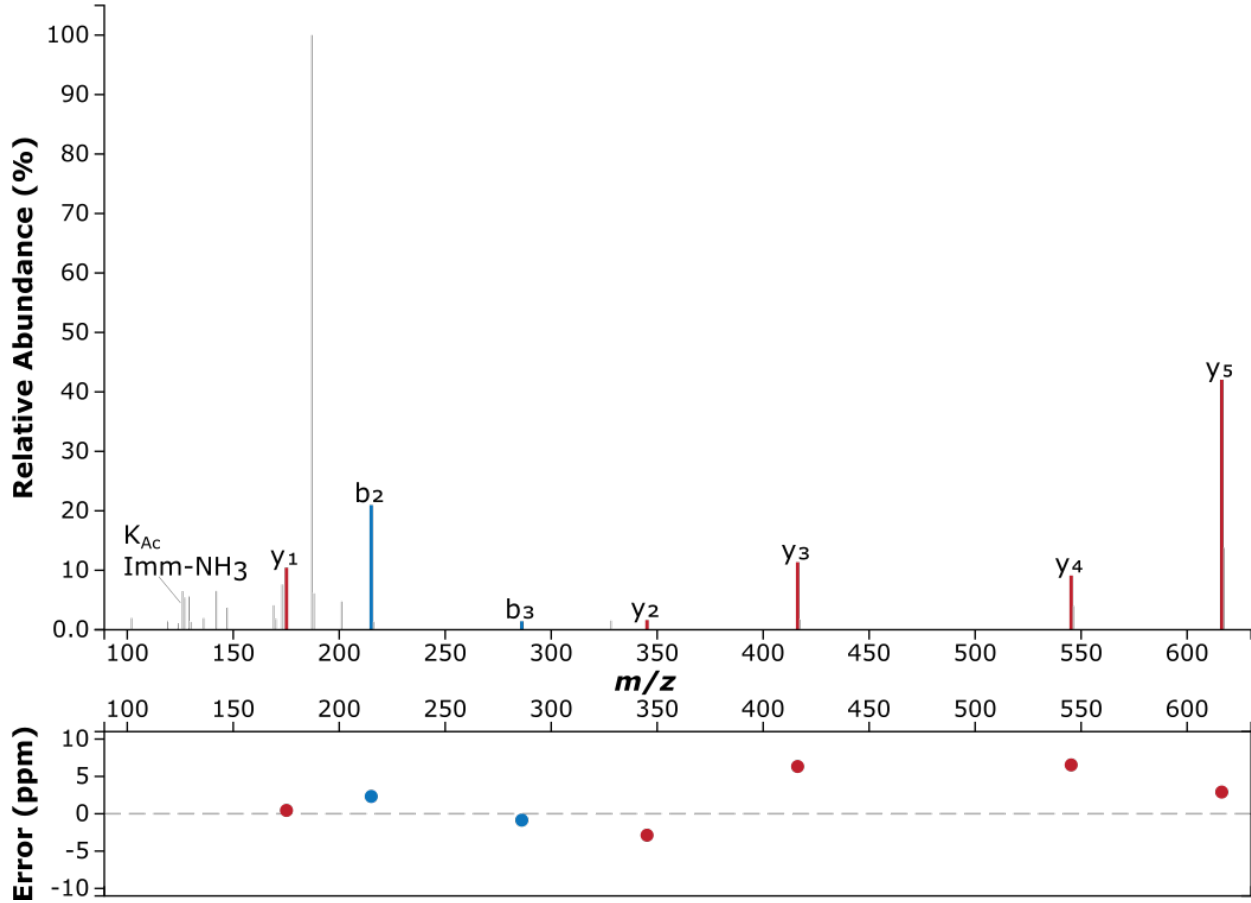

E A A Q k<sup>AC</sup> F M A D F T S K

Precursor m/z: 758.3610 Charge: +2

Putative enoyl-CoA hydratase (Q2LXU6)

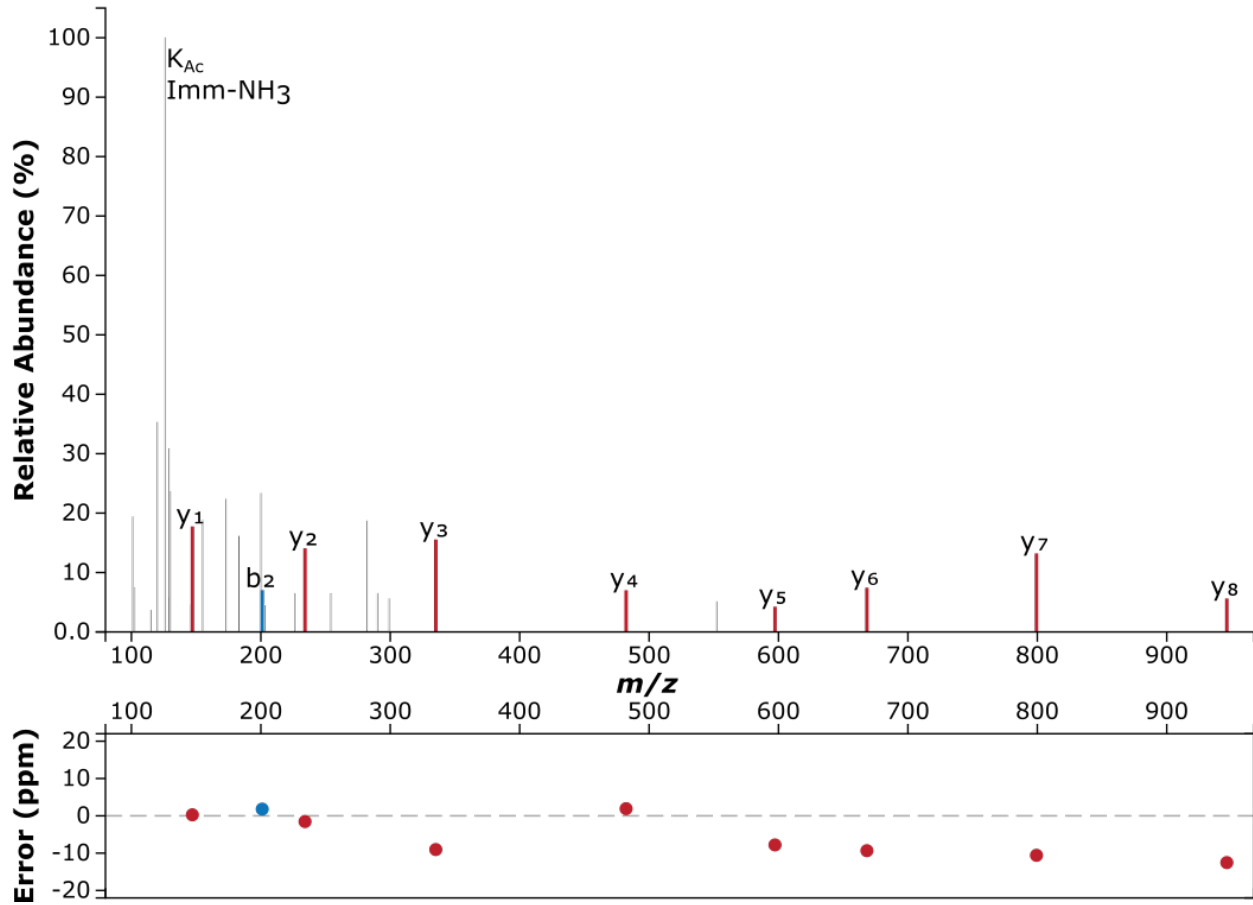

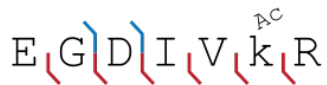

Precursor m/z: 429.7376      Charge: +2  
 ATP synthase subunit alpha 1 (Q2LQZ7)

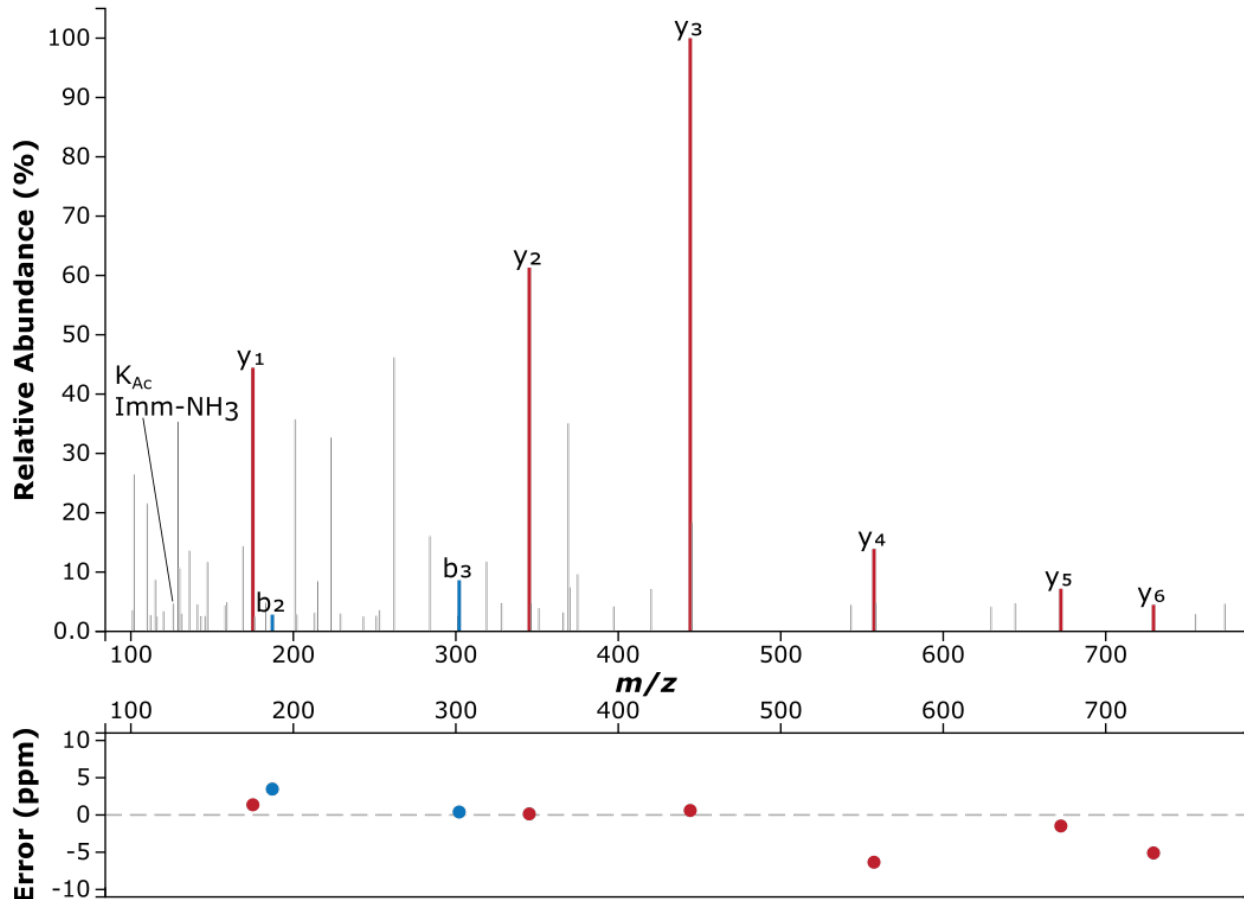

E G I R P A P G T E L F F F A T E <sup>Ac</sup> k E H R

Precursor m/z: 582.5499

Charge: +4

2,3-bisphosphoglycerate-independent phosphoglycerate mutase 1 (Q2LWQ4)

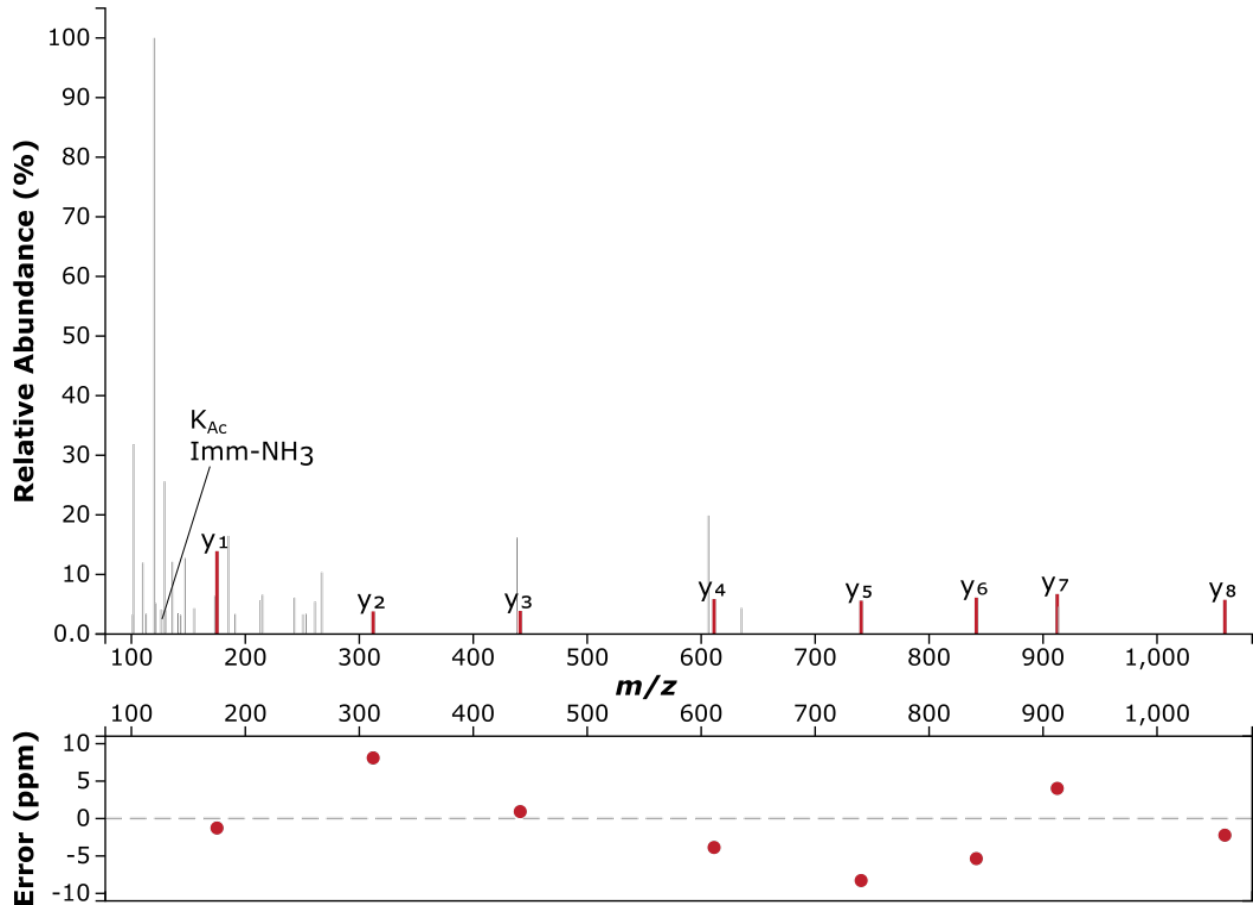

E k T A S T I I <sup>Ac</sup> G G W V N T G D K

Precursor m/z: 606.9793

Charge: +3

4-hydroxybenzoate-CoA ligase / benzoate-CoA ligase (Q2LRH7)

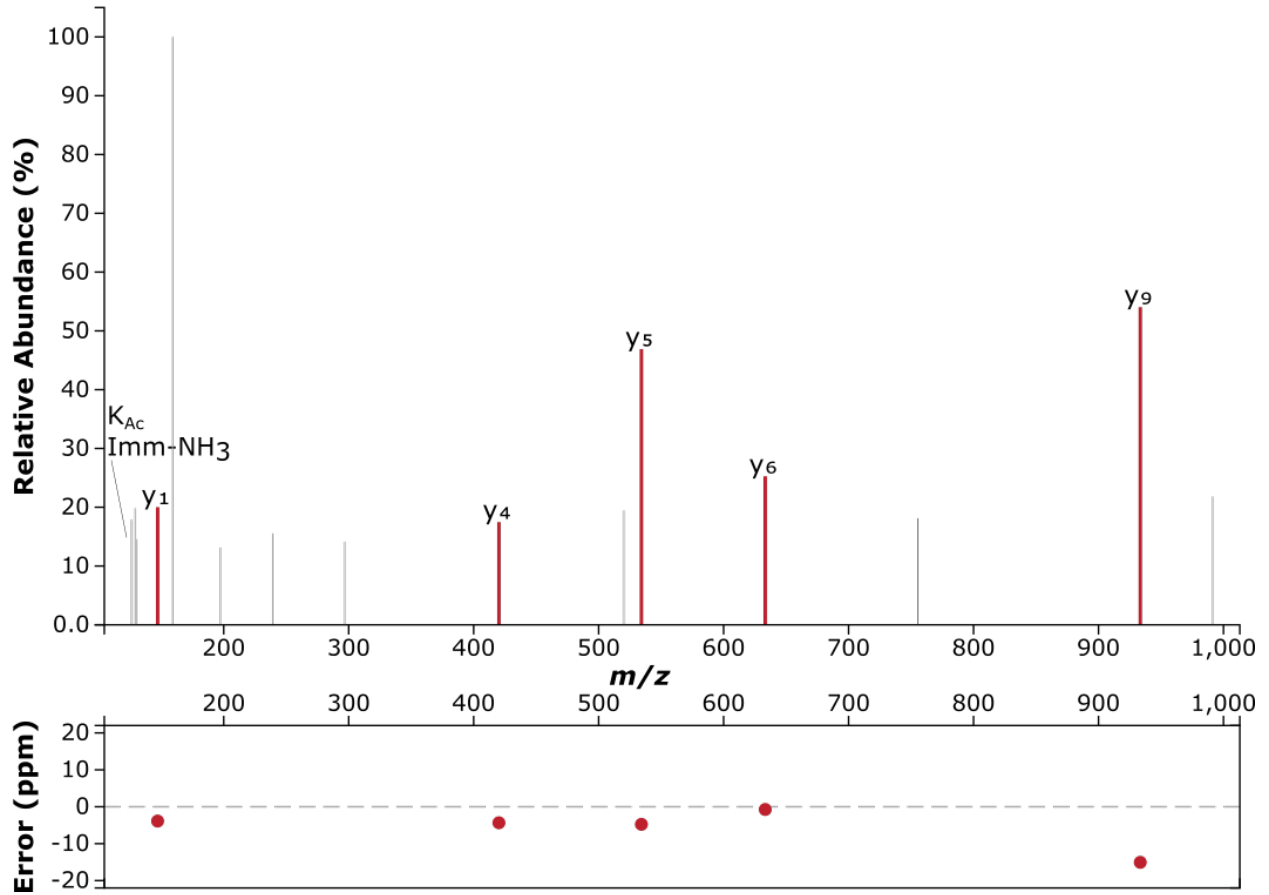



E L G L <sup>PC</sup> k P L A K

Precursor m/z: 505.8159 Charge: +2

Acetyl-CoA acetyltransferase (Q2LWQ5)

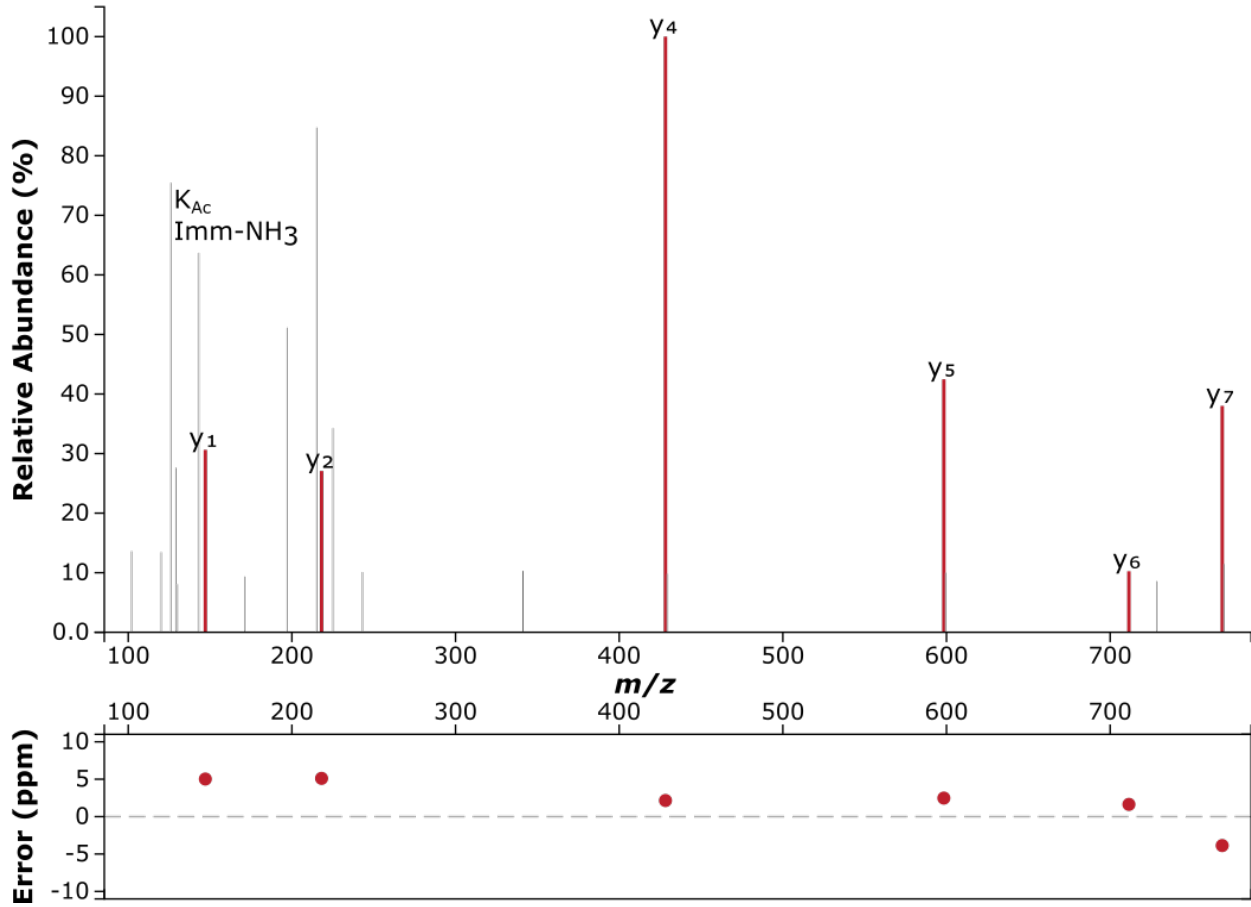

E L <sup>Ac</sup> k Q W V L D R

Precursor m/z: 614.8379

Charge: +2

4-hydroxybenzoate-CoA ligase / benzoate-CoA ligase (Q2LRH7)

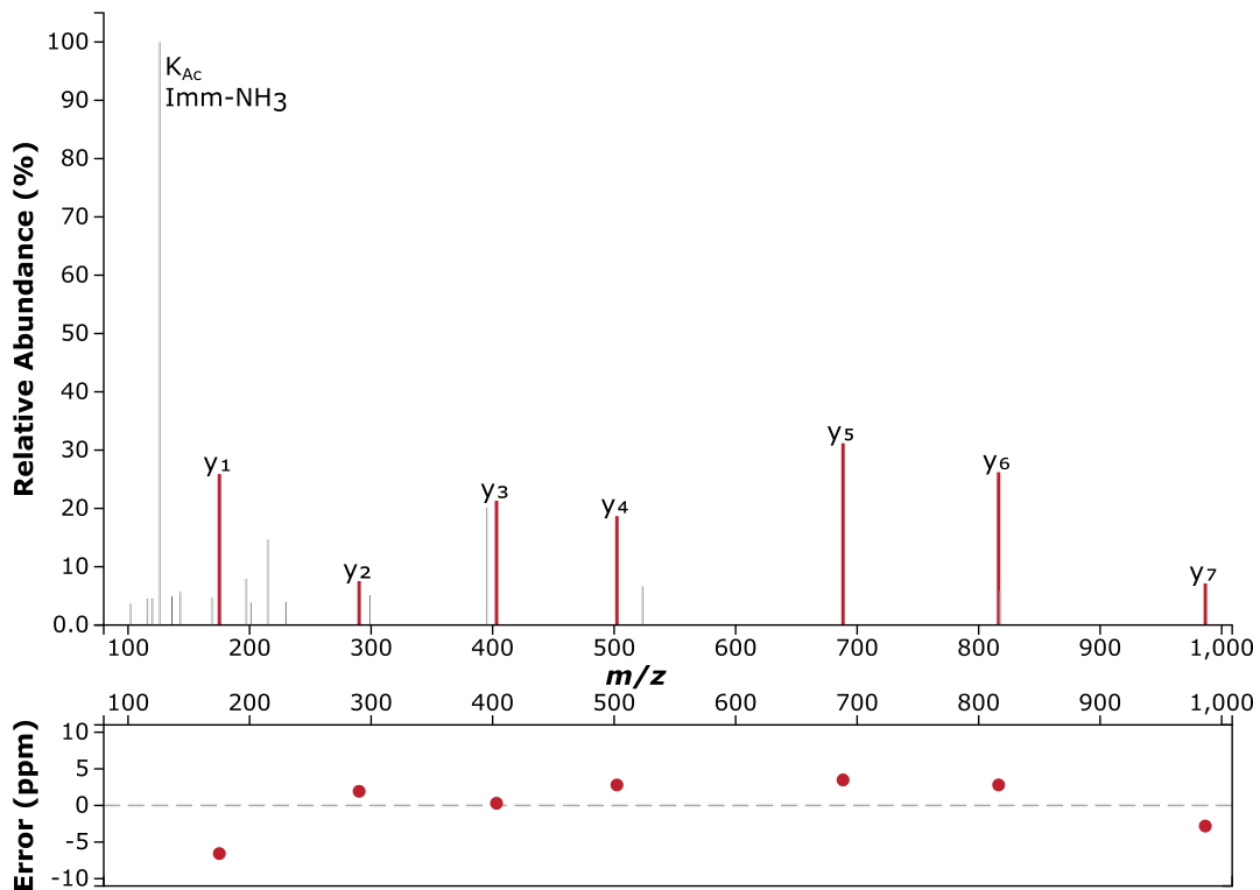

E L P F N P S G k K<sup>AC</sup>

Precursor m/z: 579.8113      Charge: +2  
Long-chain-fatty-acid-CoA ligase (Q2LR69)

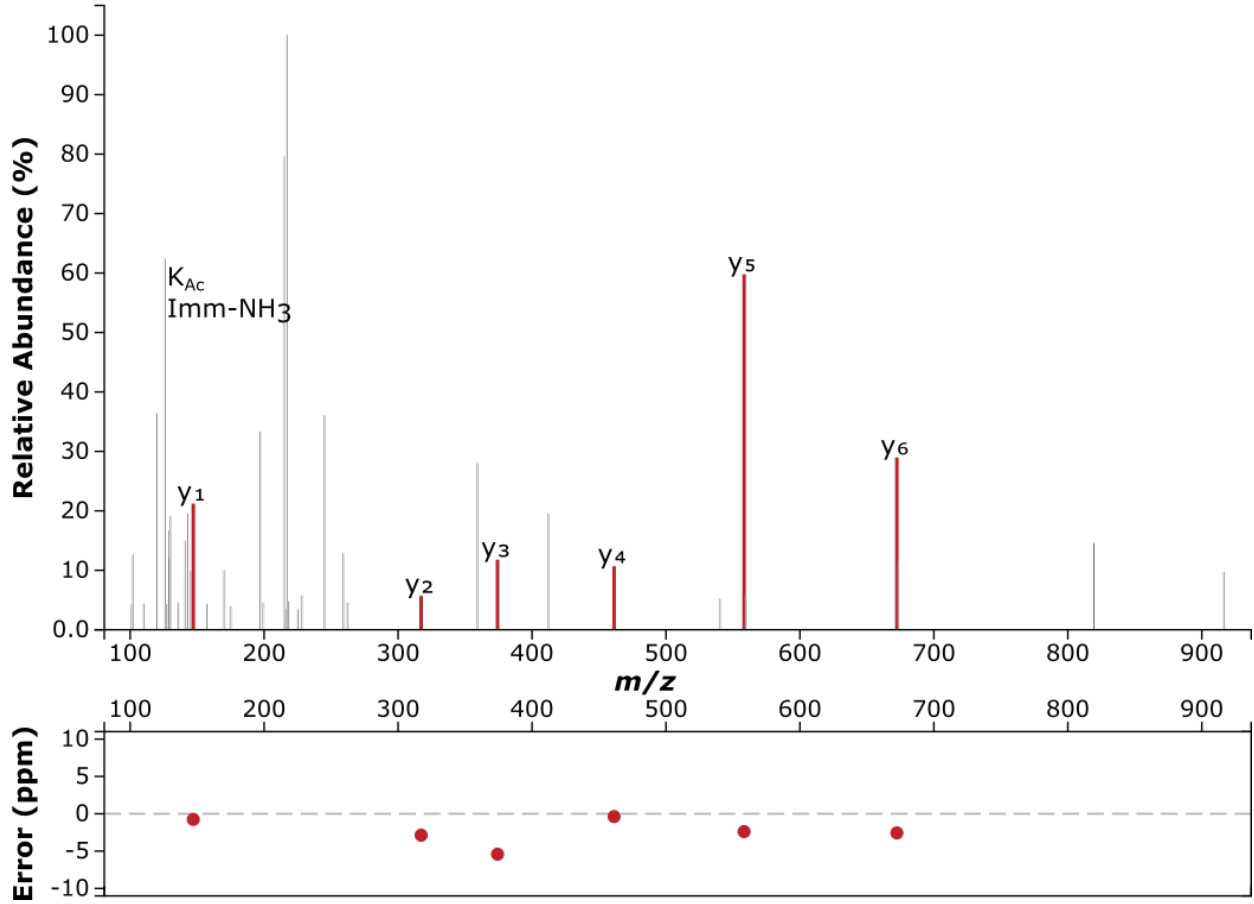

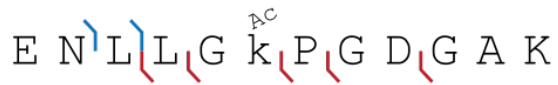

Precursor m/z: 620.8302

Charge: +2

Acyl-CoA dehydrogenase, short-chain specific (Q2LUY8)

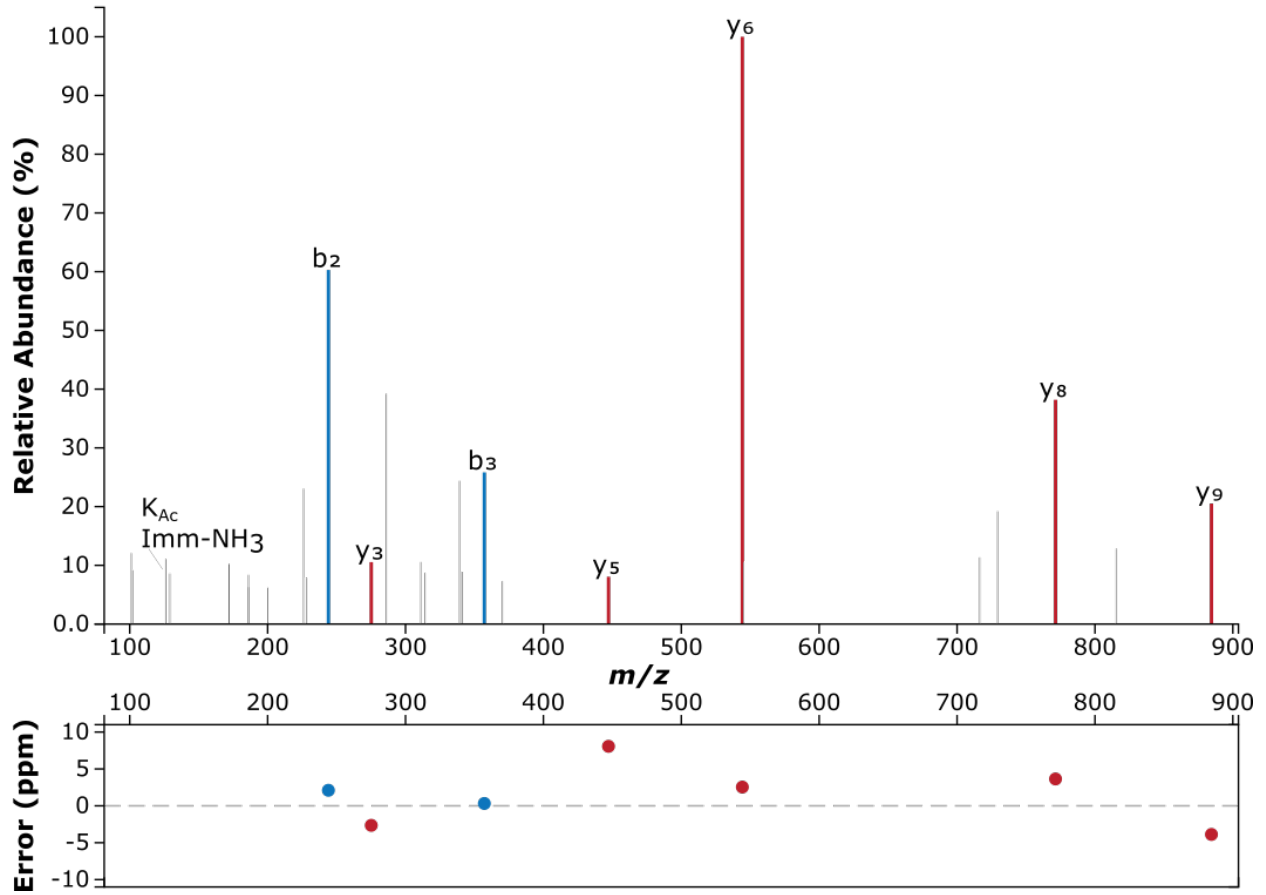

E T G E k I P G Q L Q L T E I P V P E L K

Precursor m/z: 787.7686

Charge: +3

6-hydroxycyclohex-1-ene-1-carboxyl-CoA dehydrogenase (Q2LXU3)

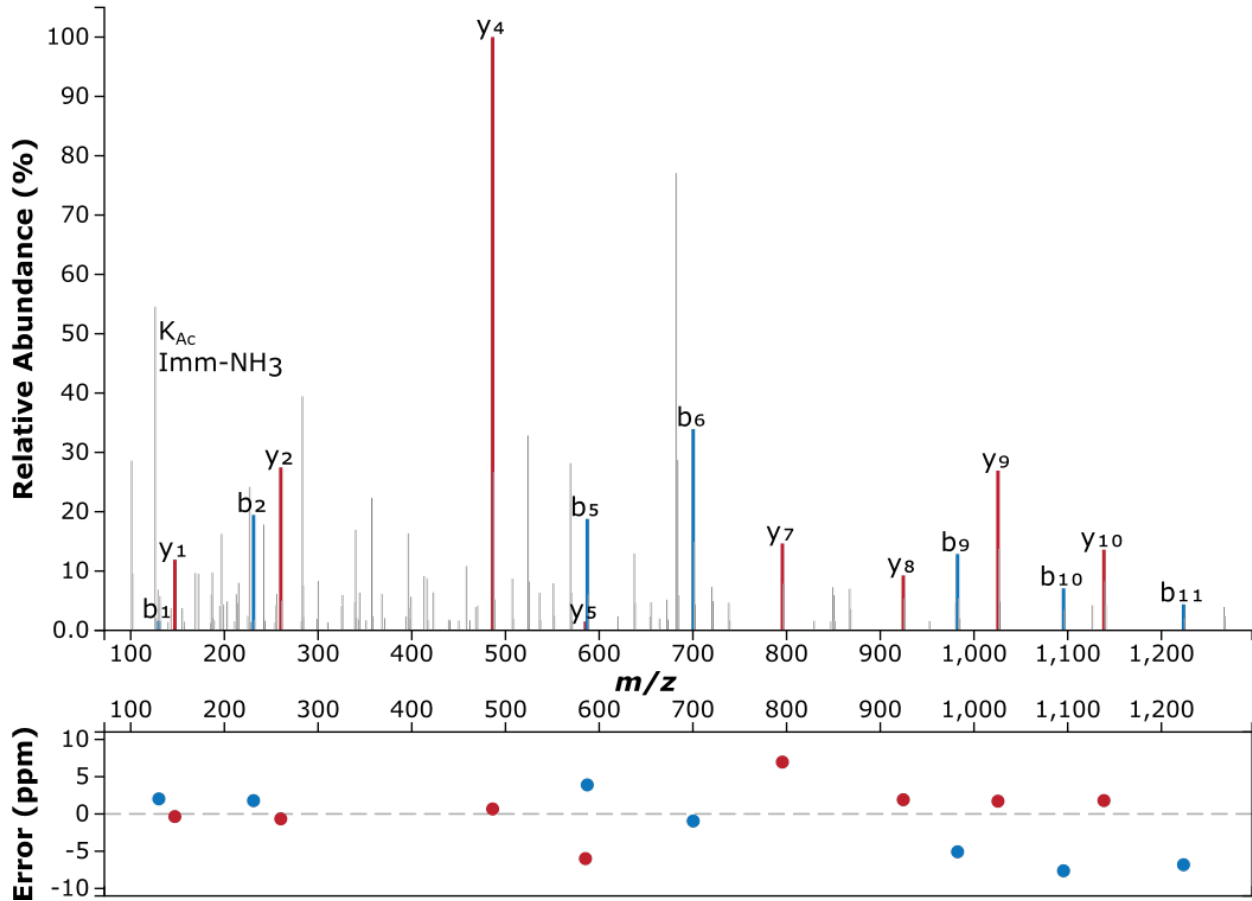

F K G E V E V <sup>AC</sup> k <sup>AC</sup> D G K

Precursor m/z: 426.5627

Charge: +3

Glyceraldehyde-3-phosphate dehydrogenase (Q2LWW2)

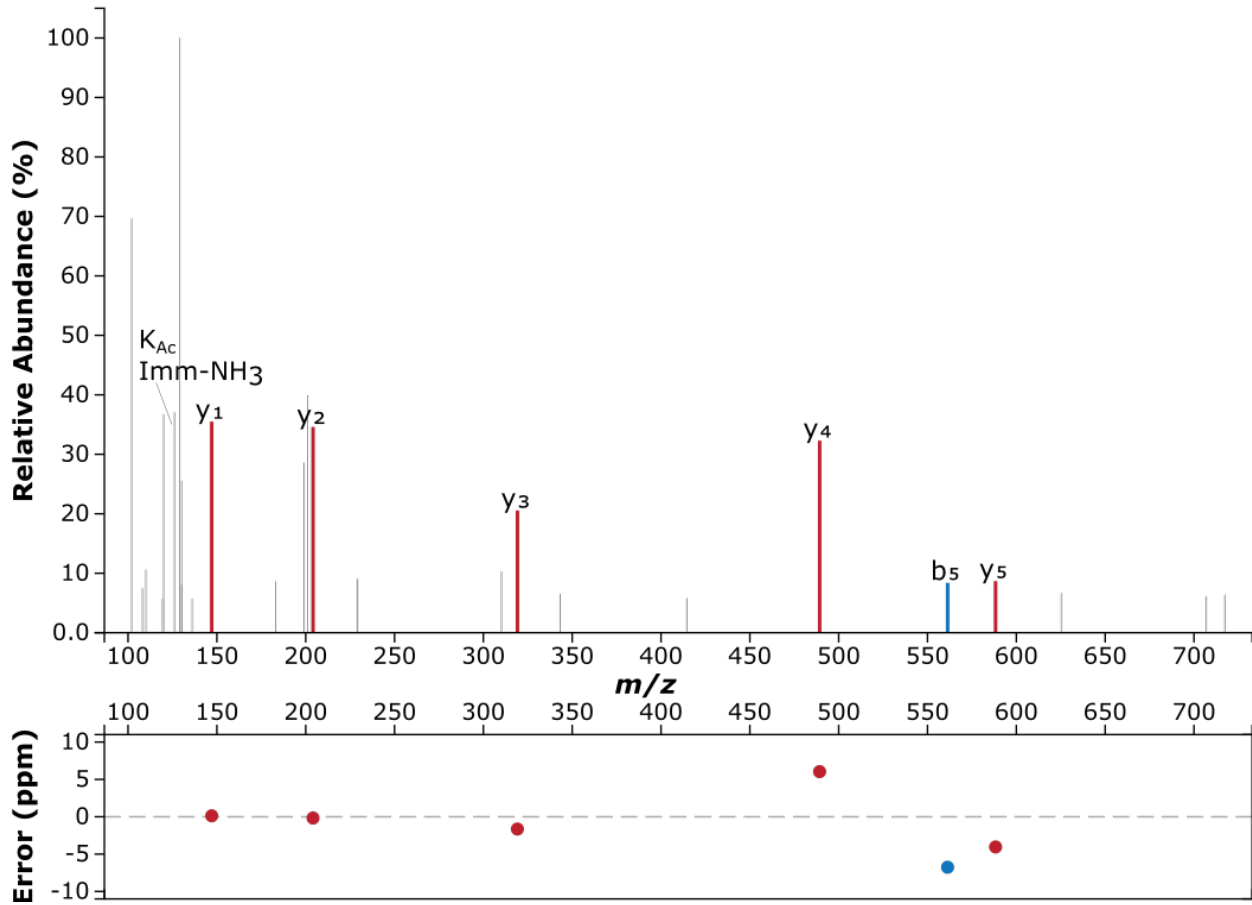

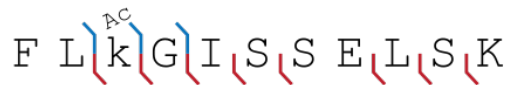

Precursor m/z: 625.8532 Charge: +2

Phosphoserine aminotransferase (Q2LSJ6)

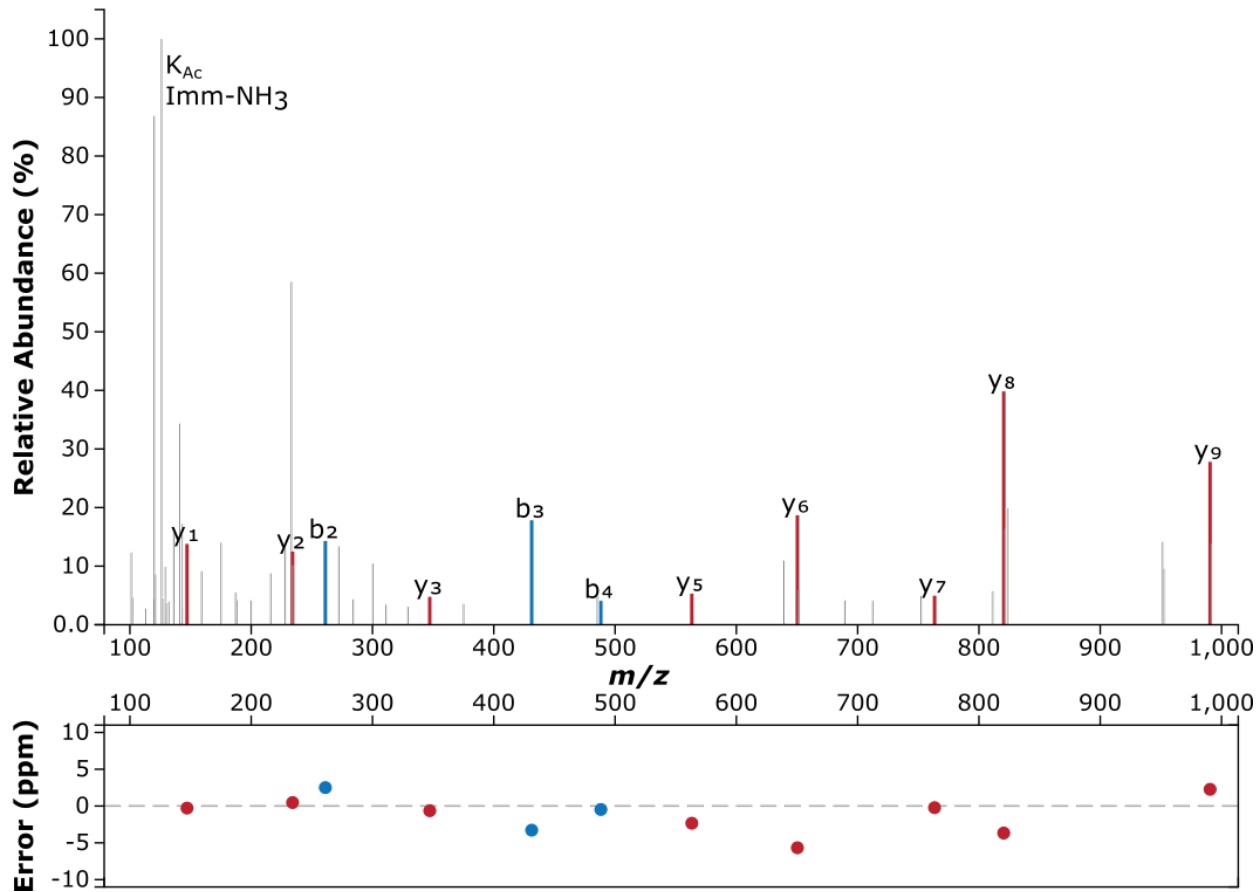

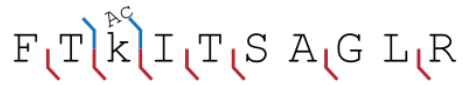

Precursor m/z: 568.3271 Charge: +2  
 Inosine-5'-monophosphate dehydrogenase (Q2LTT4)

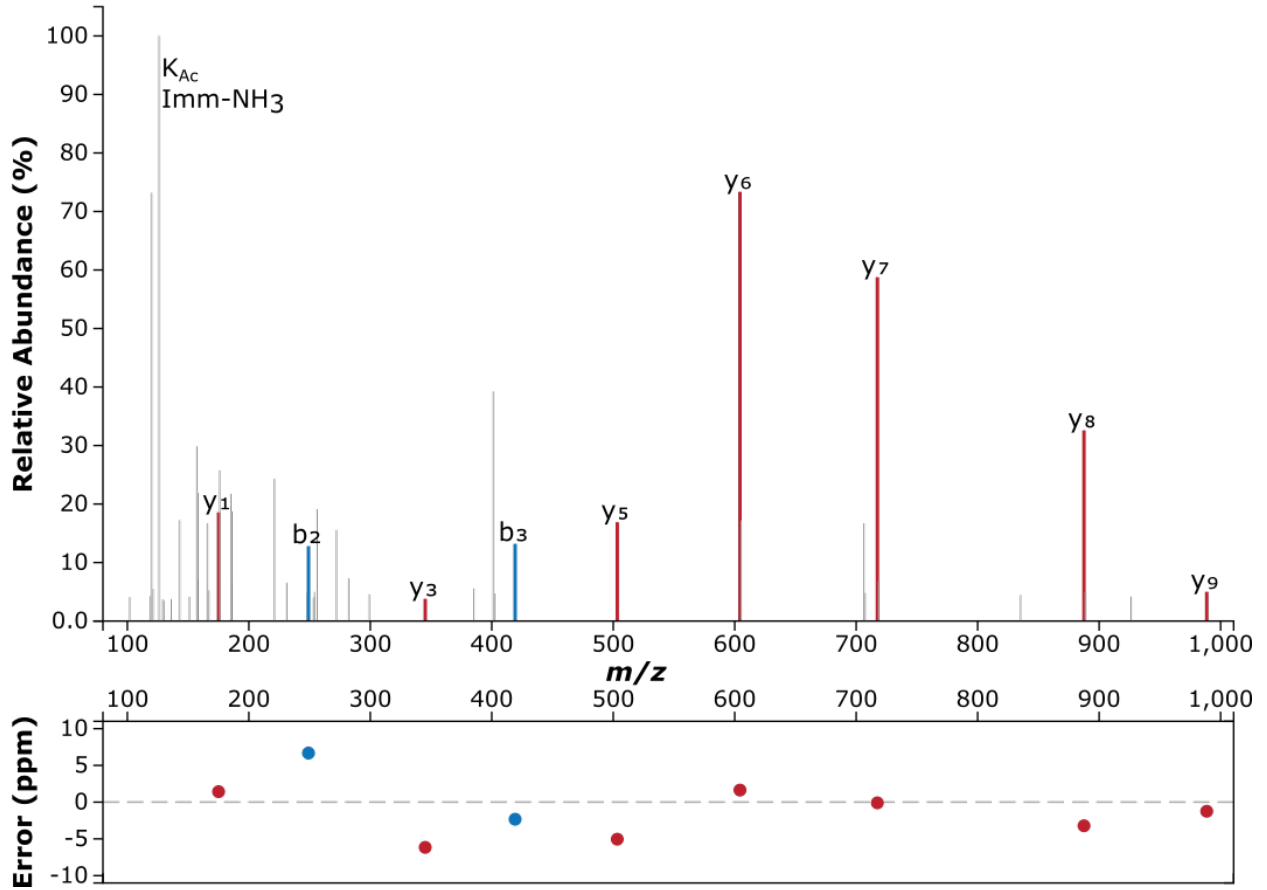



G A G A D P k<sup>PC</sup> D H D L V S L R

Precursor m/z: 531.6057

Charge: +3

4-hydroxybenzoate-CoA ligase / benzoate-CoA ligase (Q2LRH0)

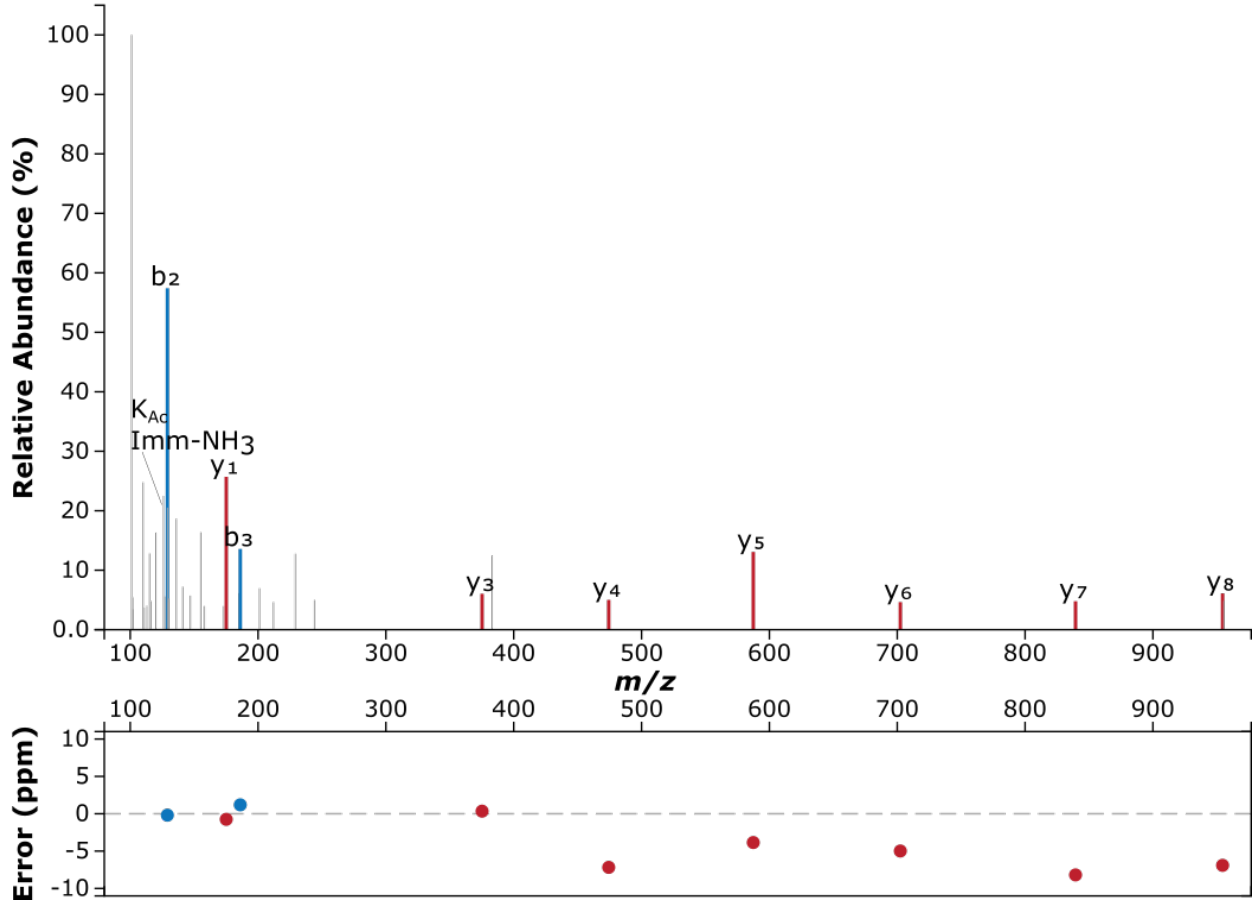

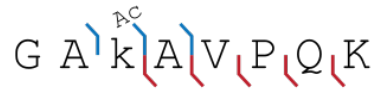

Precursor m/z: 420.7505 Charge: +2  
 Acetyl-CoA synthetase (Q2LWR8)

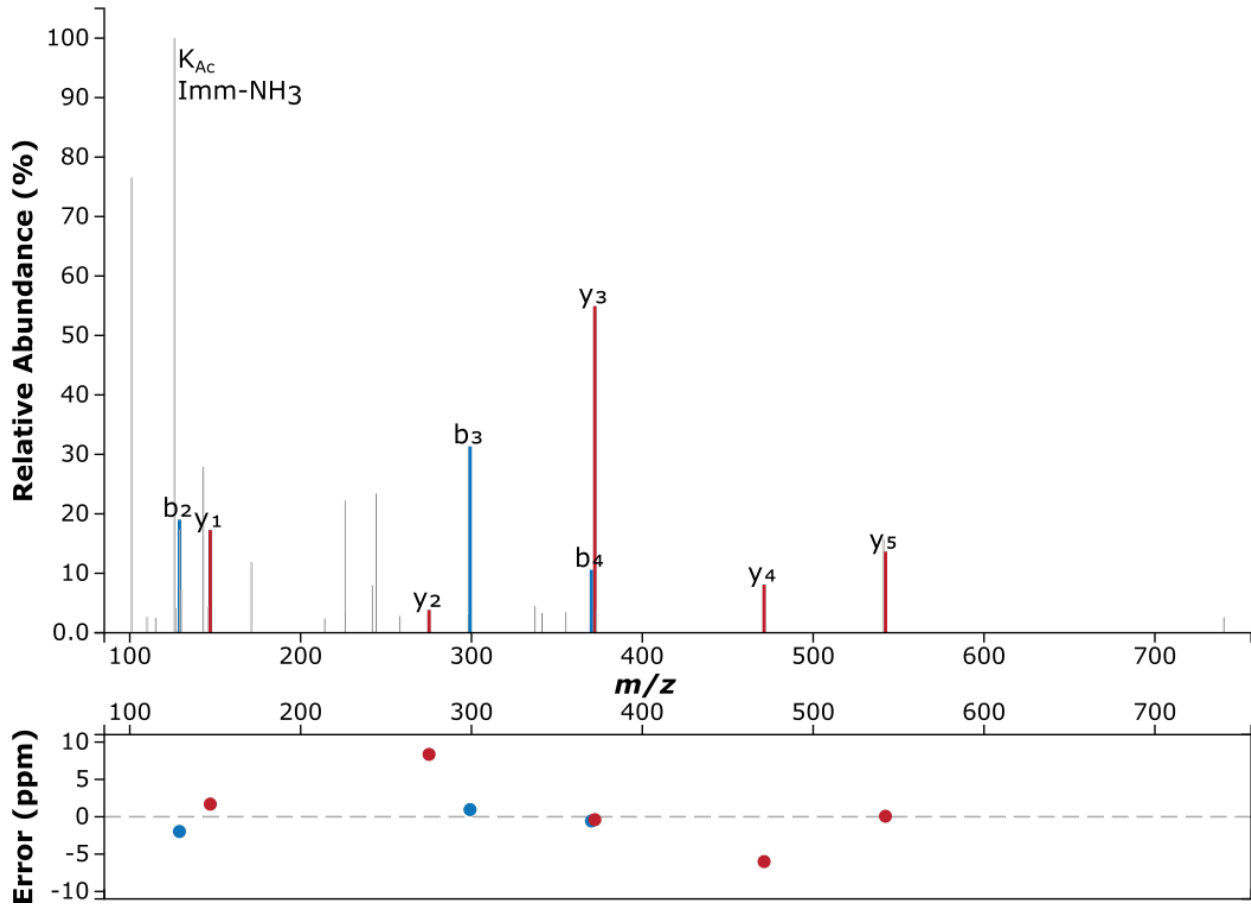

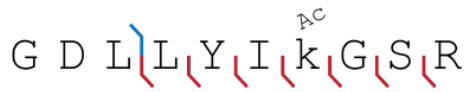

Precursor m/z: 582.3246

Charge: +2

Molecular chaperone (Q2LYH4)

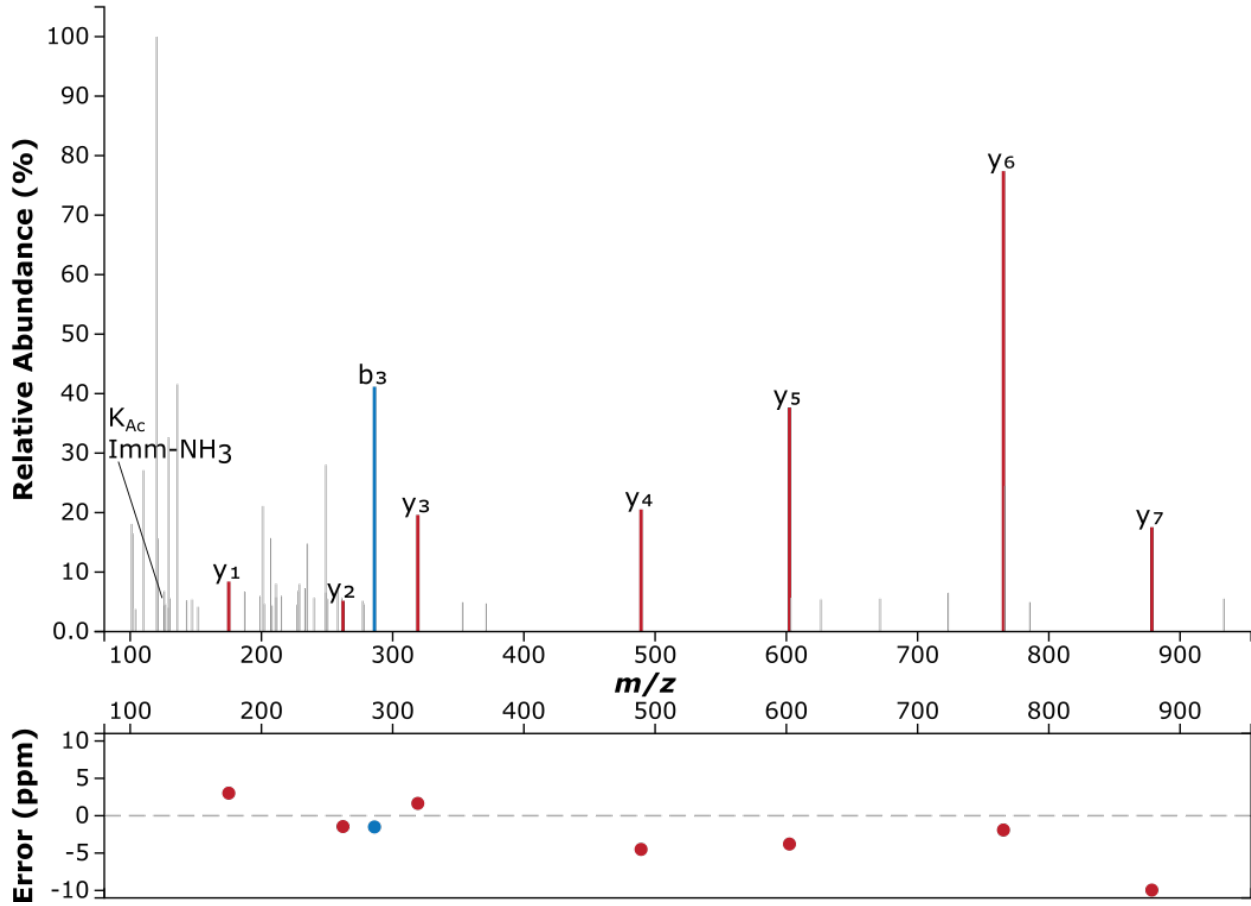

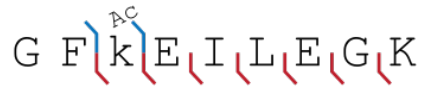

Precursor m/z: 531.7951 Charge: +2

ATP synthase subunit beta (Q2LR05)

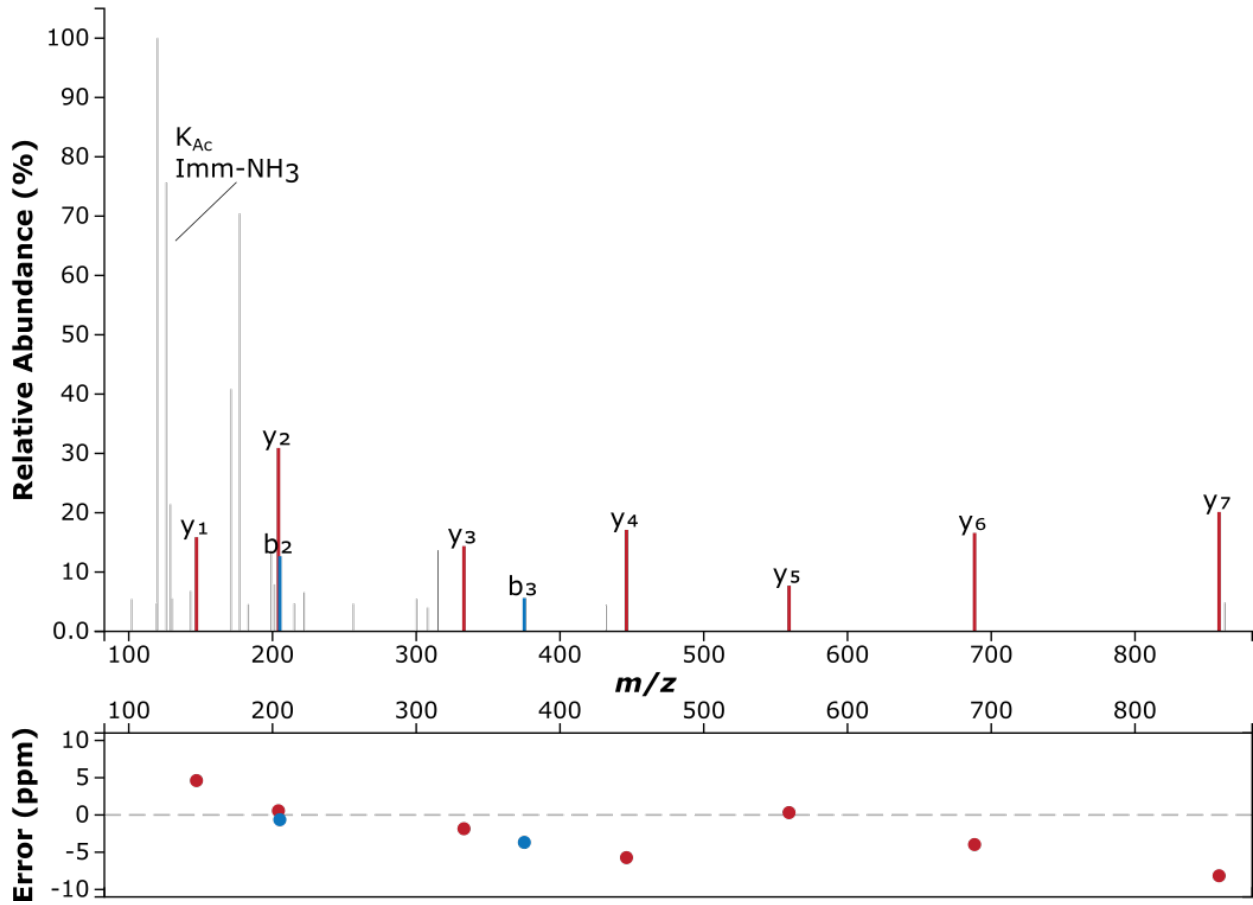

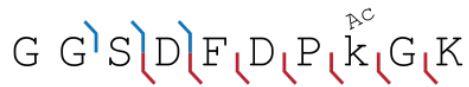

Precursor m/z: 525.2485 Charge: +2  
 Glutamate dehydrogenase (Q2LQG2)

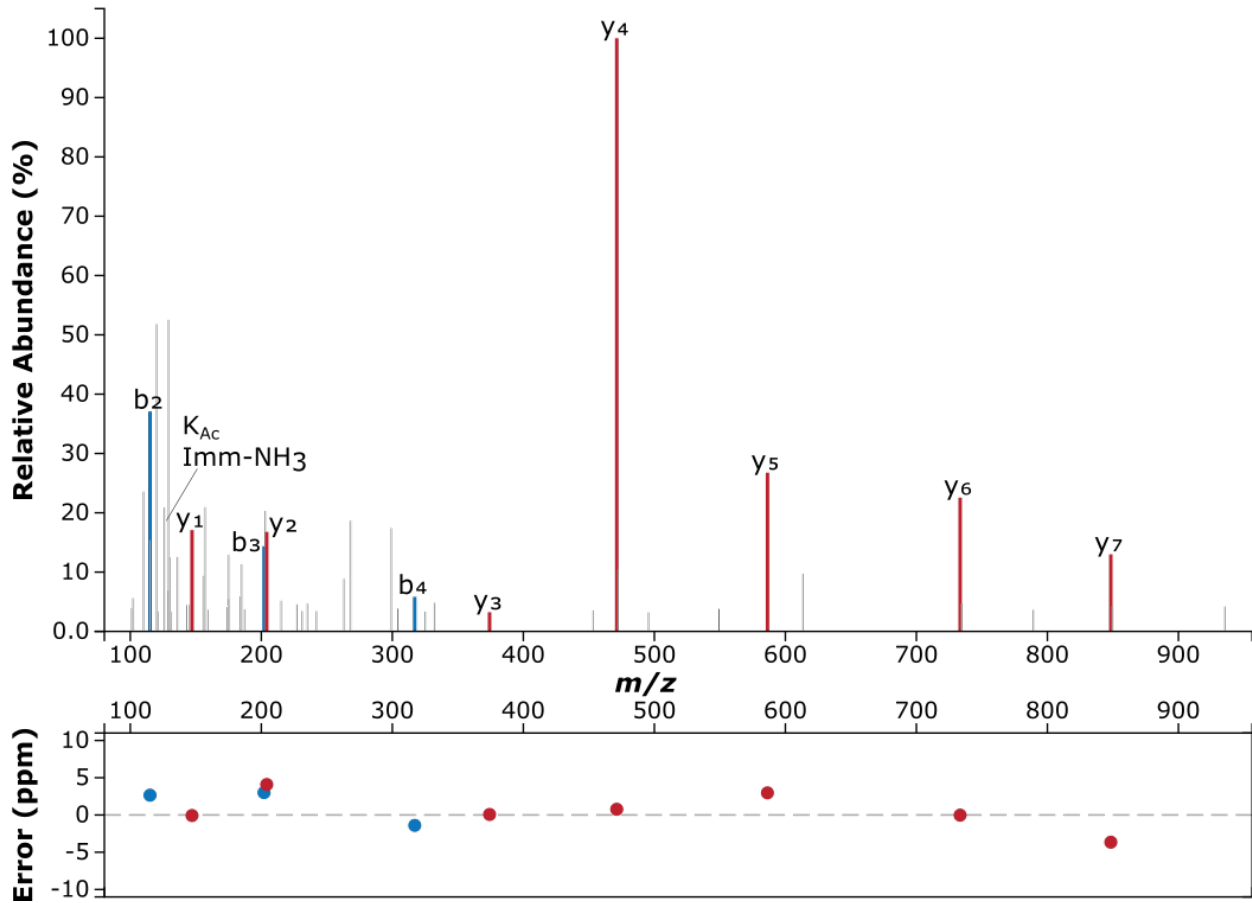

G I I <sup>AC</sup> k T G D E V E I V G V R P T Q K

Precursor m/z: 694.3915

Charge: +3

Elongation factor Tu (Q2LQA3)

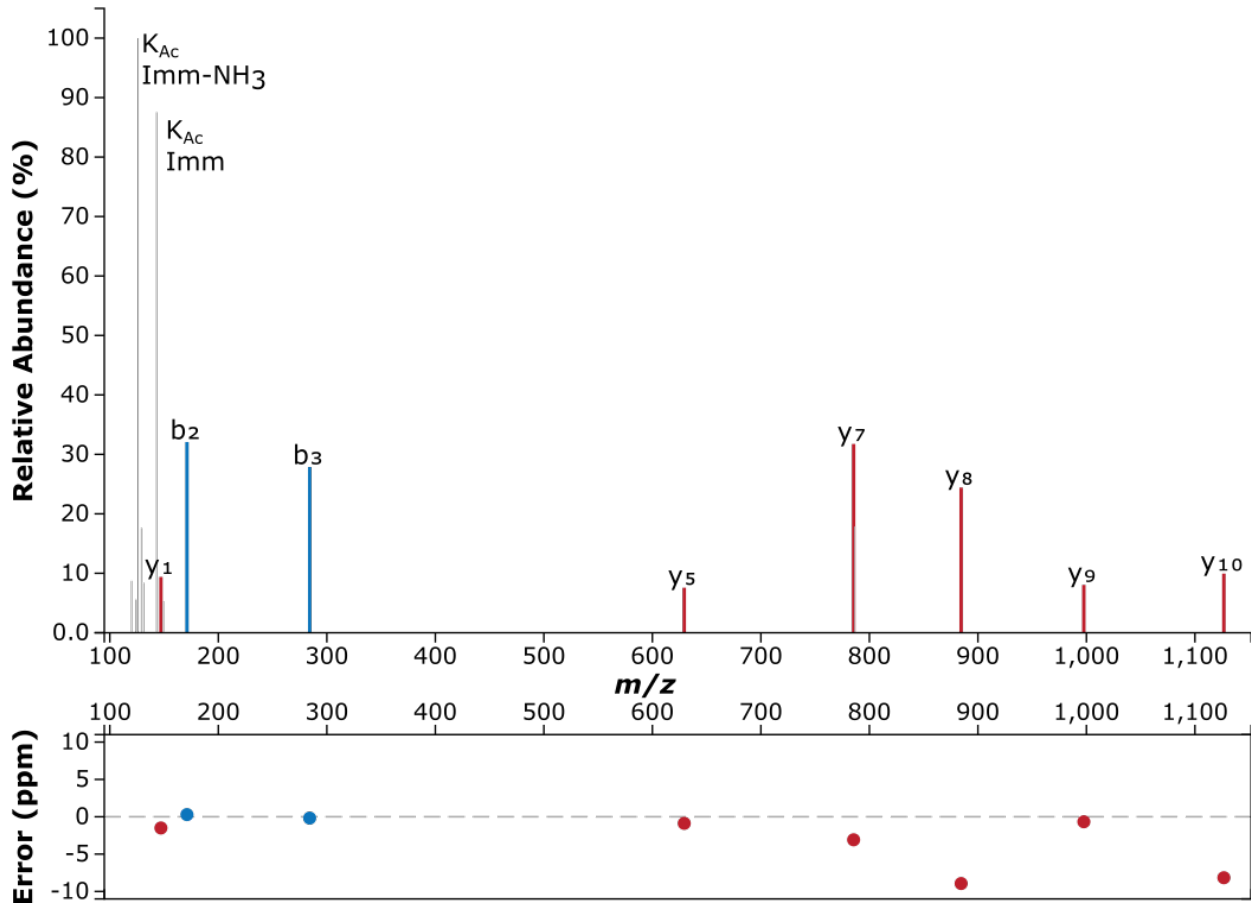

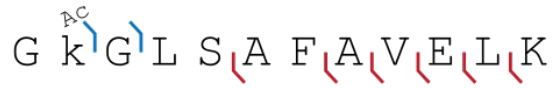

Precursor m/z: 631.3612 Charge: +2

Acyl-CoA dehydrogenase, short-chain specific (Q2LUY8)

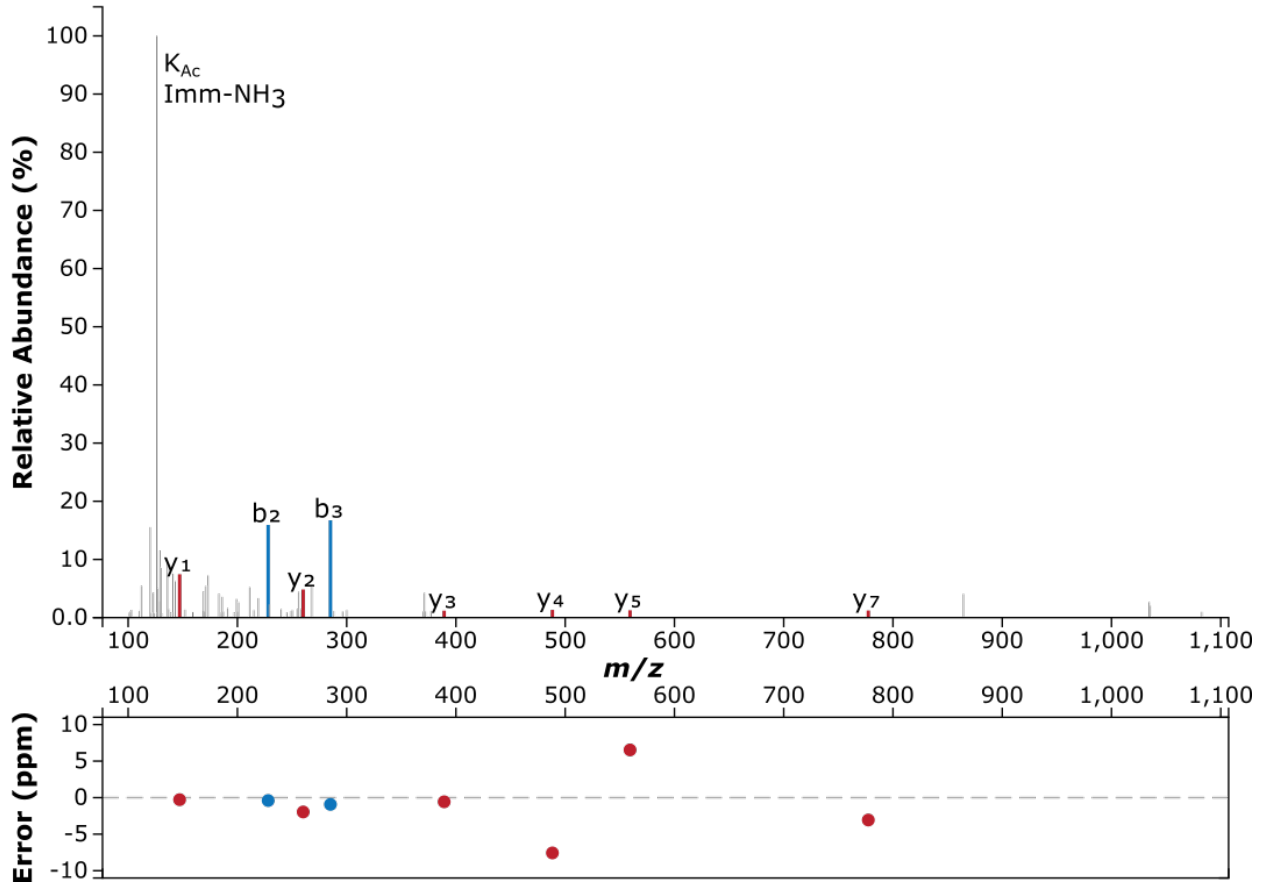

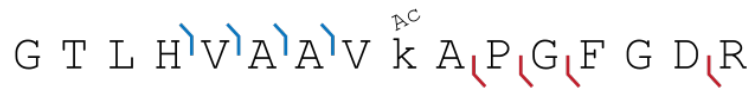

Precursor m/z: 546.6301 Charge: +3

60 kDa chaperonin 2 (Q2LTG7)

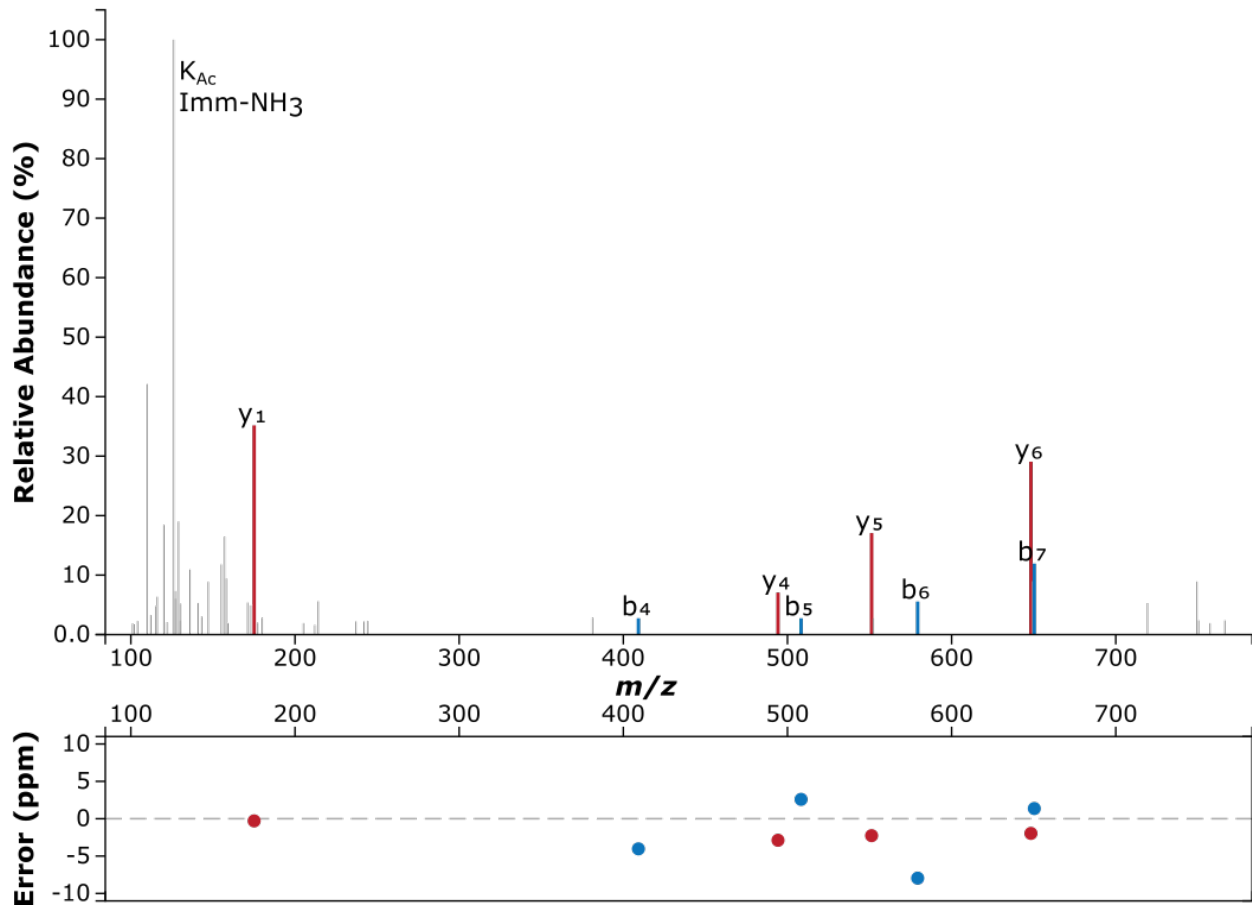



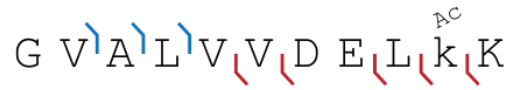

Precursor m/z: 606.8635 Charge: +2  
 60 kDa chaperonin 3 (Q2LU42)

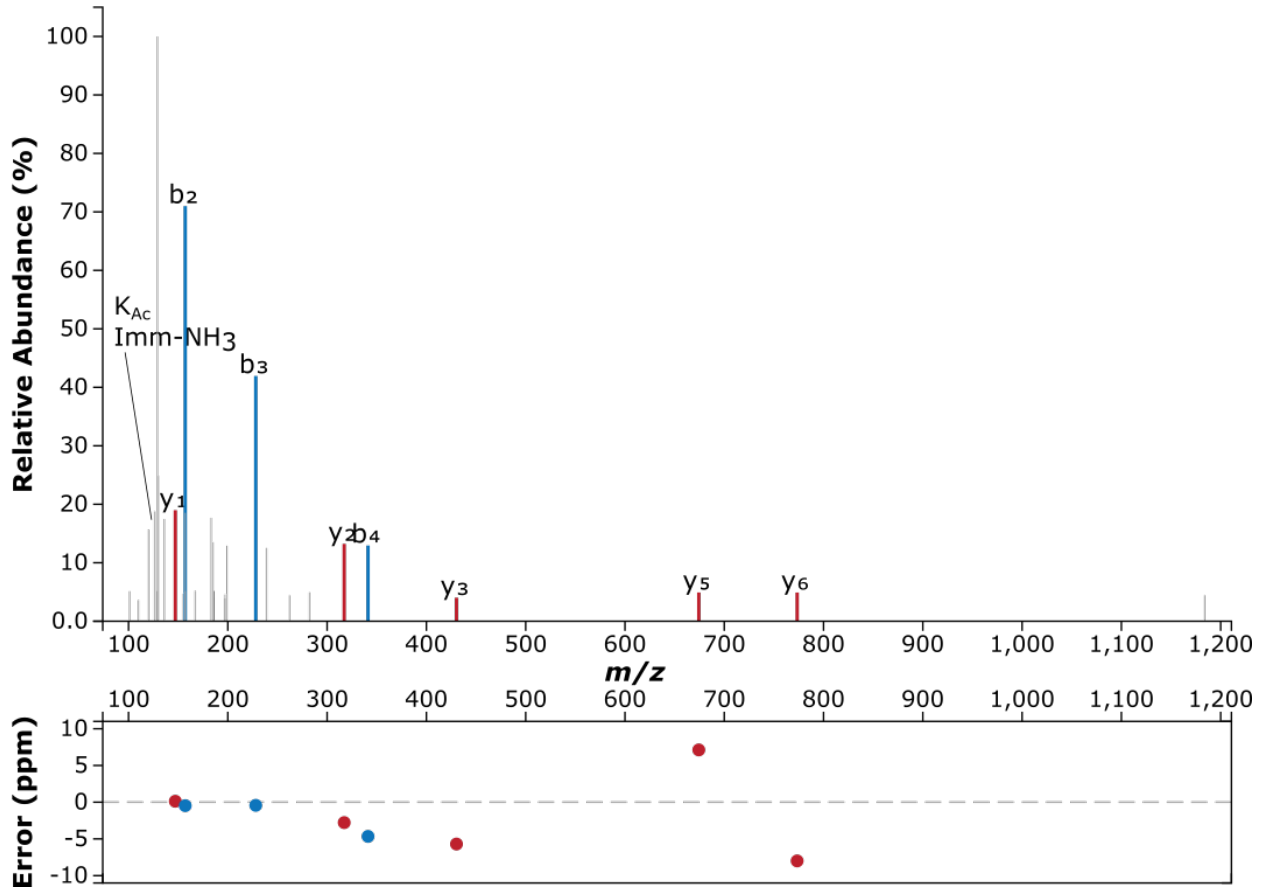

H G V L P N Y P E Y T N E Y I G V G G K L Y R

Precursor m/z: 894.4501

Charge: +3

Glutaconyl-CoA decarboxylase A subunit (Q2LUY7)

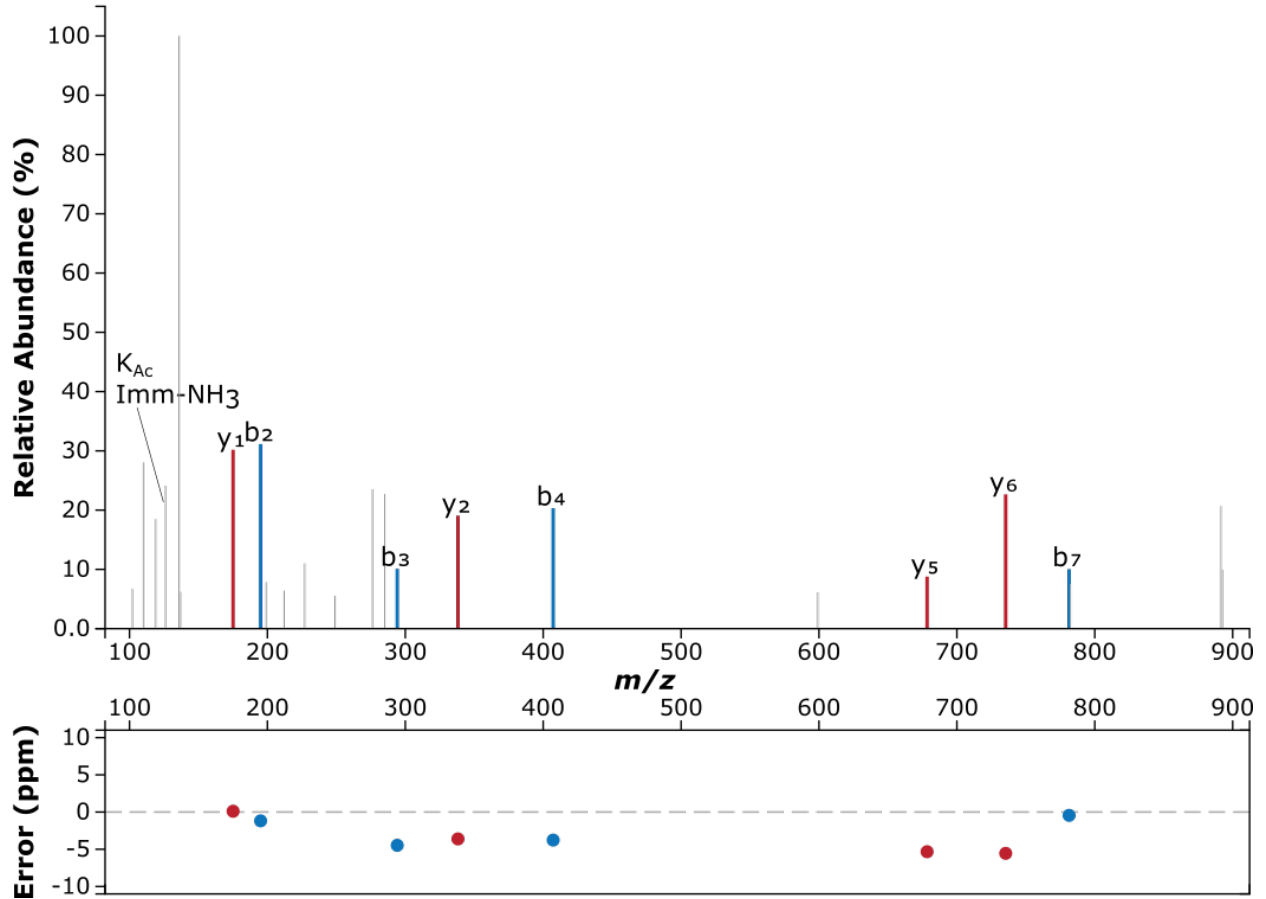

I D A E <sup>Ac</sup> k G A G A D P K

Precursor m/z: 607.3066

Charge: +2

4-hydroxybenzoate-CoA ligase / benzoate-CoA ligase (Q2LRH0)

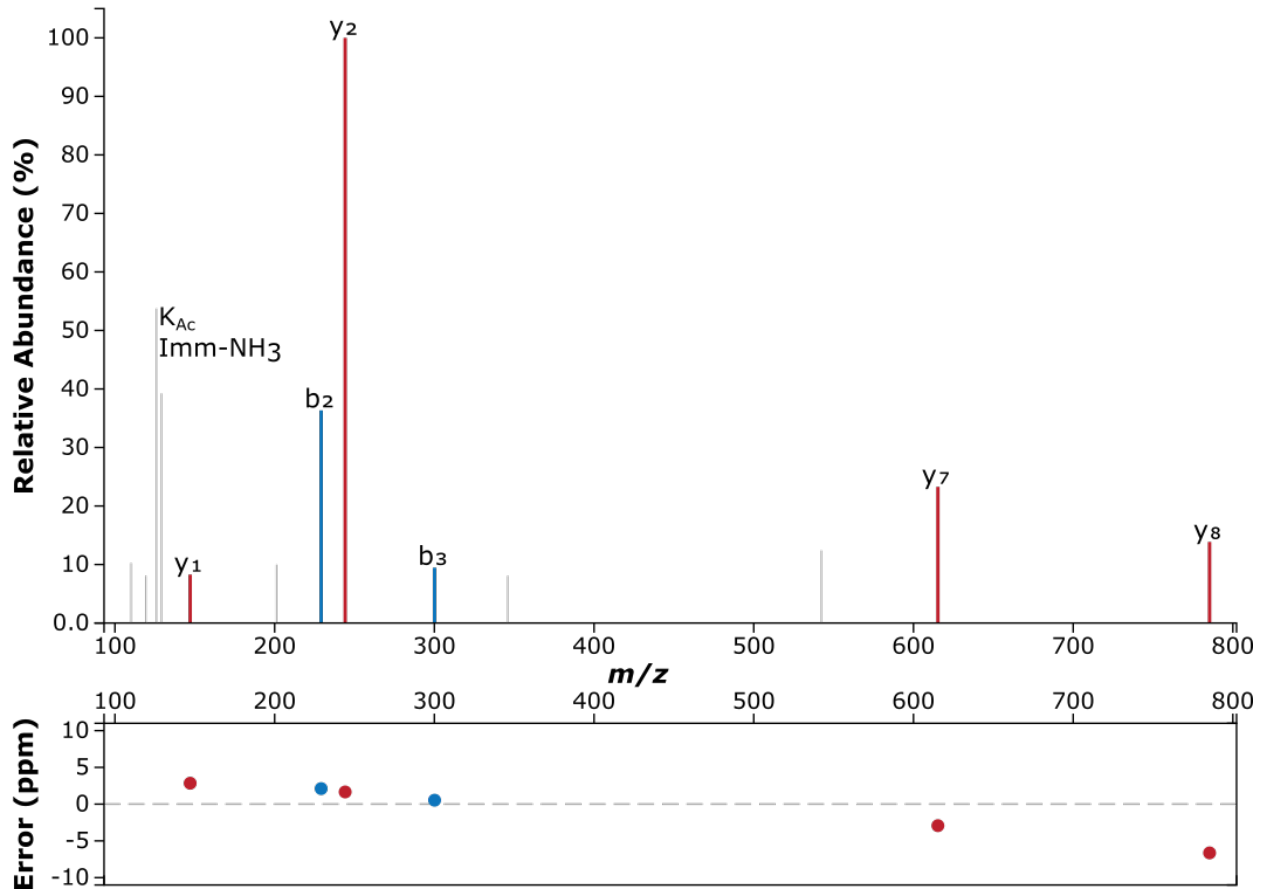

I D V L V N N A G A T <sup>Ac</sup> k P A M L H K

Precursor m/z: 645.3558

Charge: +3

3-oxoacyl-reductase (Q2LXS6)

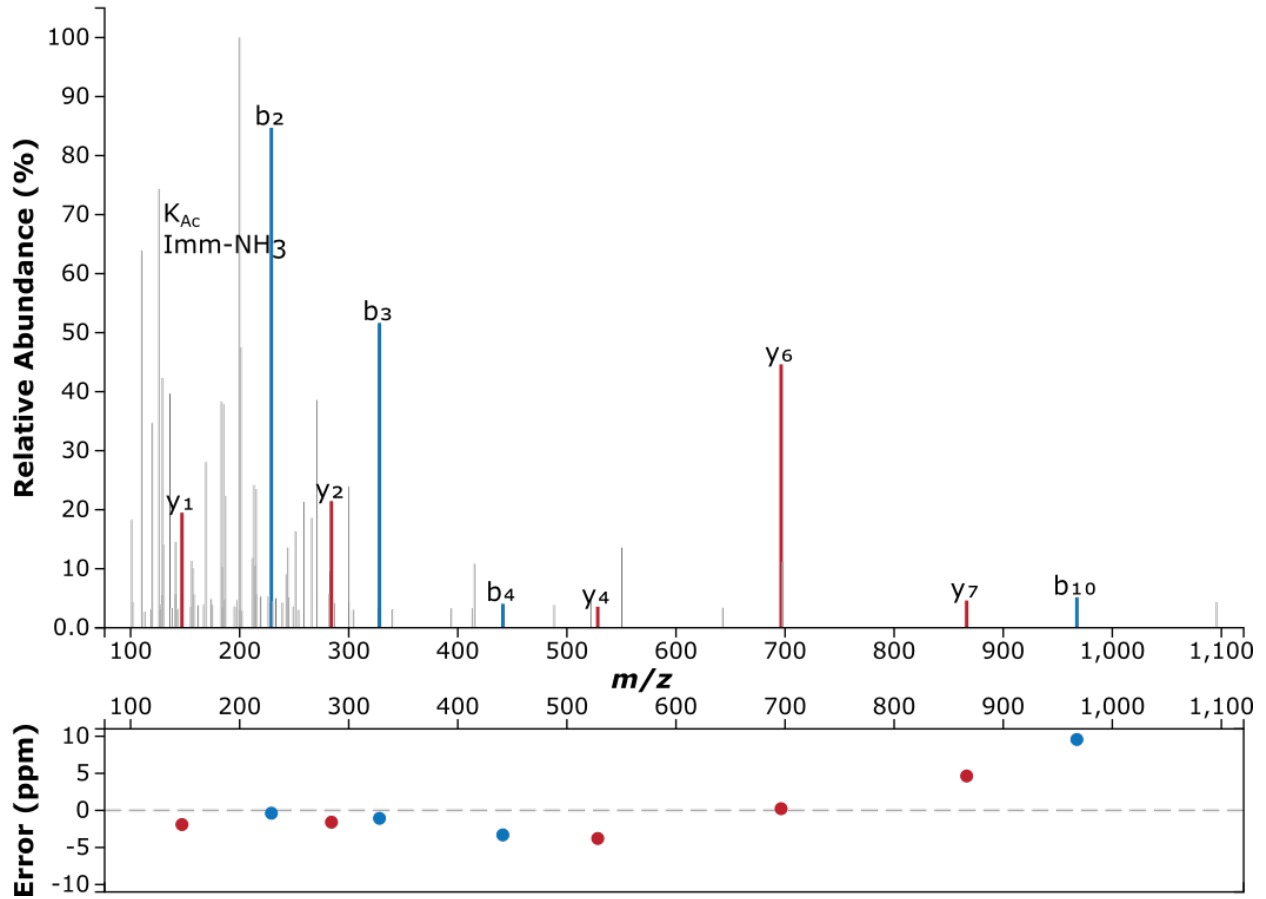

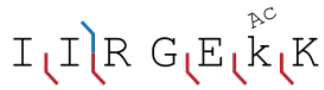

Precursor m/z: 443.2794

Charge: +2

Alpha-1,4 glucan phosphorylase (Q2LXZ0)

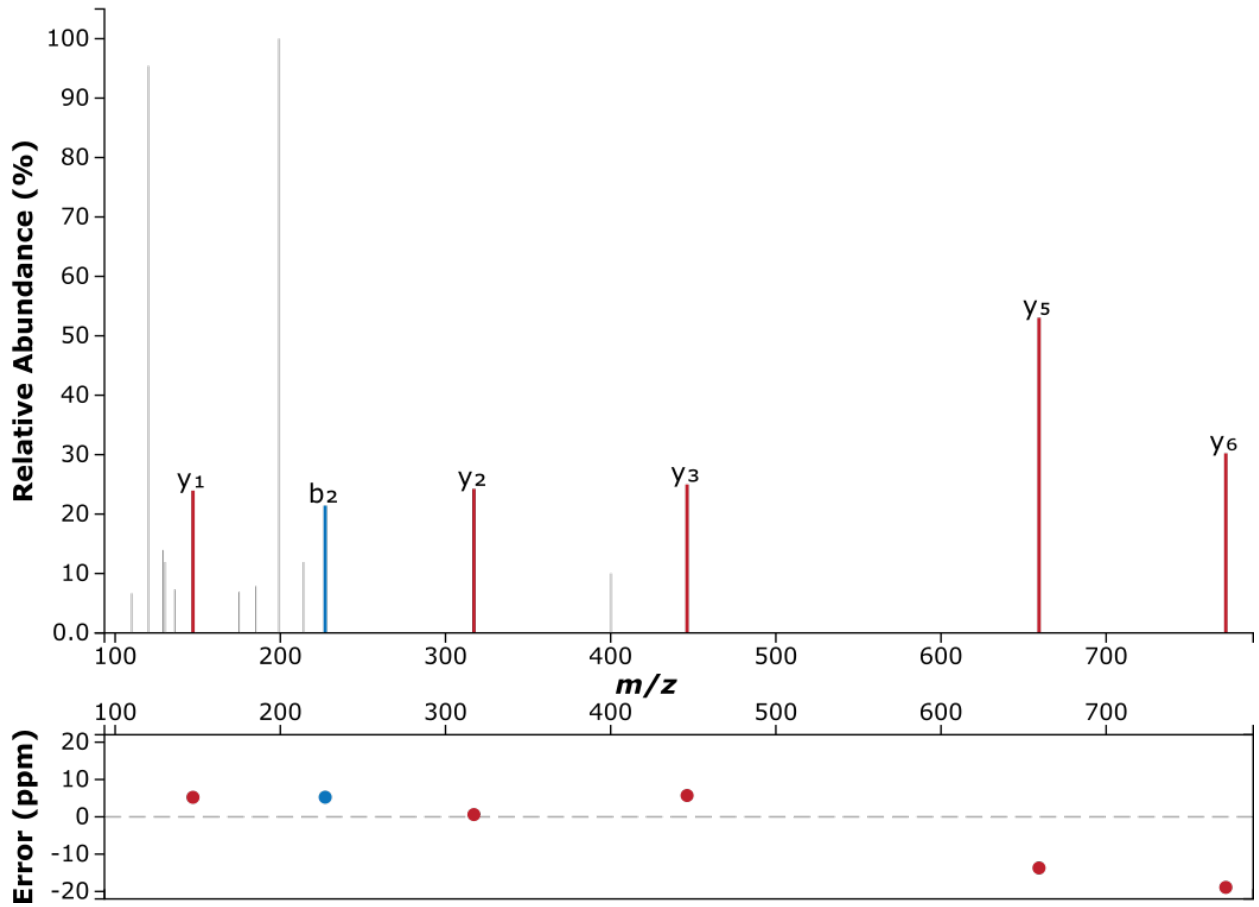

I L D P I V L G E E H Y <sup>Ac</sup> k V A R

Precursor m/z: 632.0193 Charge: +3

ATP synthase subunit beta (Q2LR05)

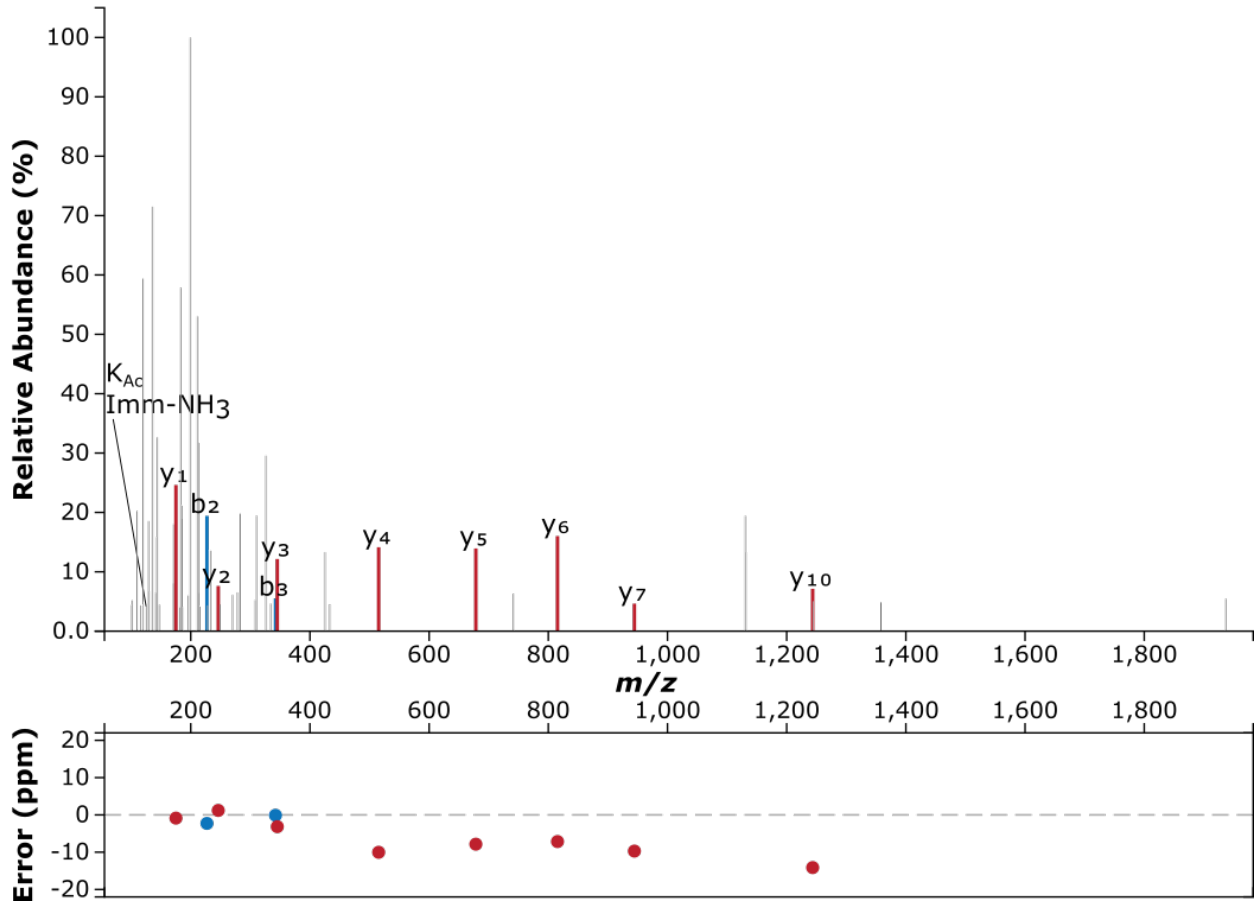

I L N V V G k P V D G L G P I E A K

Precursor m/z: 931.0433 Charge: +2

ATP synthase subunit beta (Q2LR05)

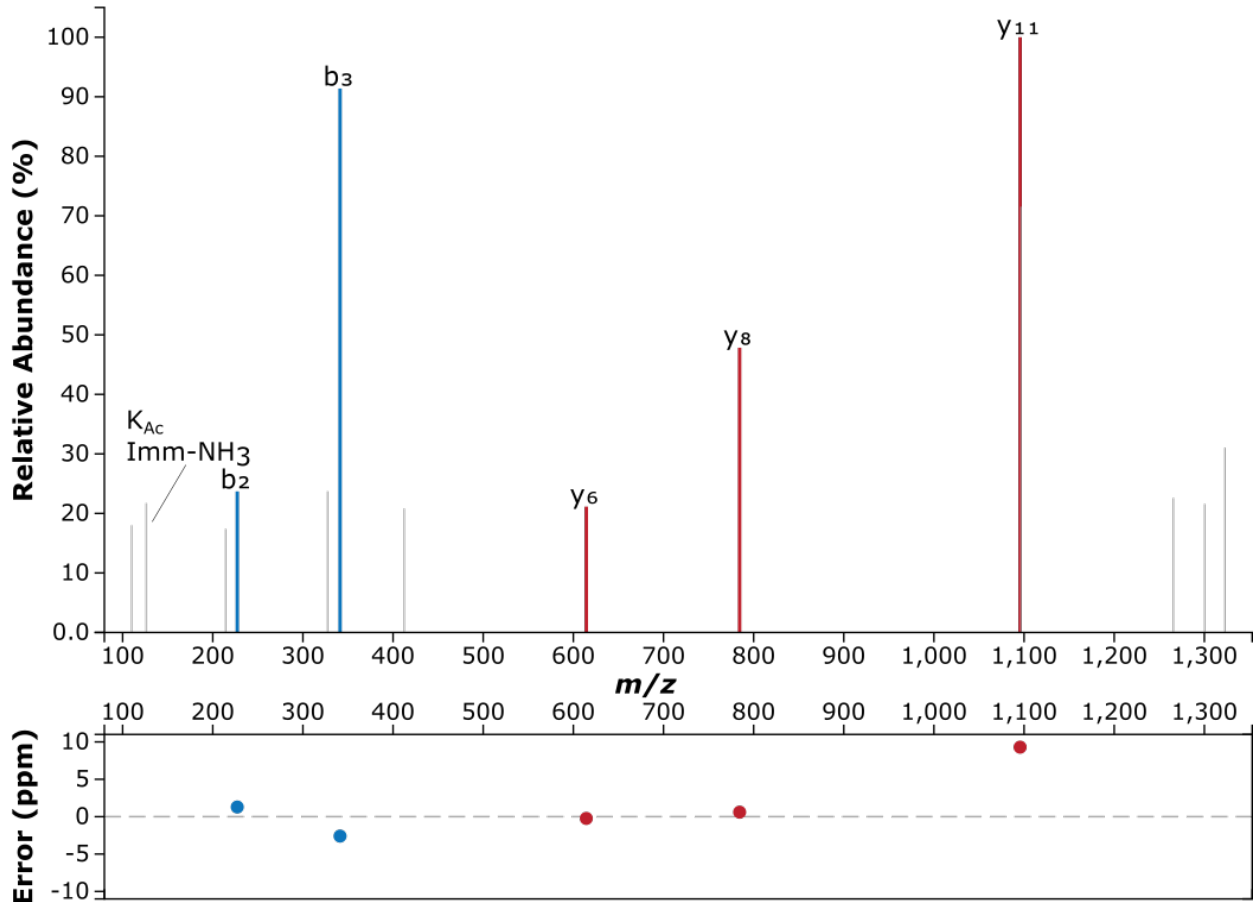

I Q I D k<sup>Ac</sup> D N T T I I D G A G E R

Precursor m/z: 950.9842

Charge: +2

60 kDa chaperonin 2 (Q2LTG7)

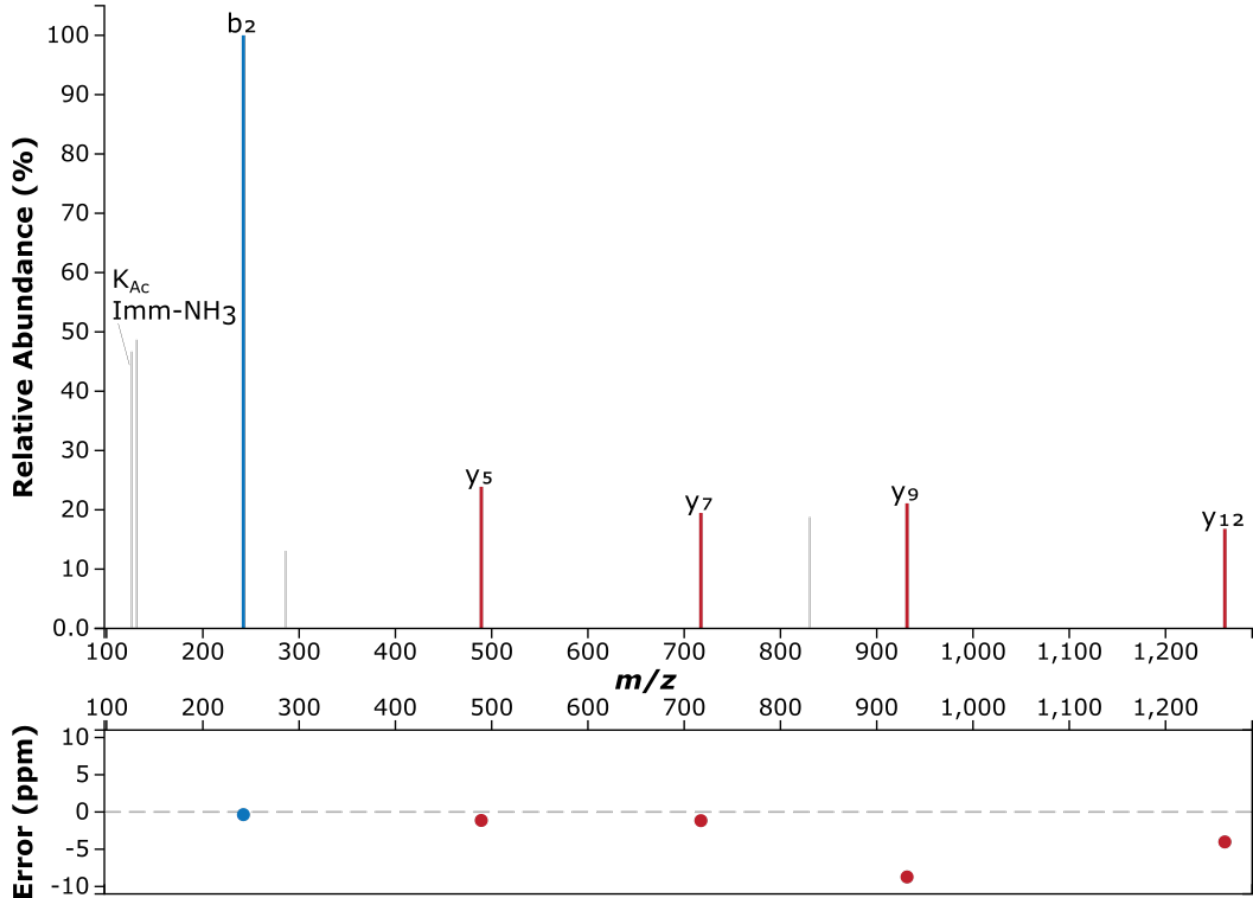



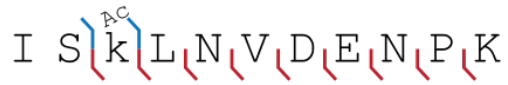

Precursor m/z: 649.8512

Charge: +2

Thioredoxin (Q2LVG3)

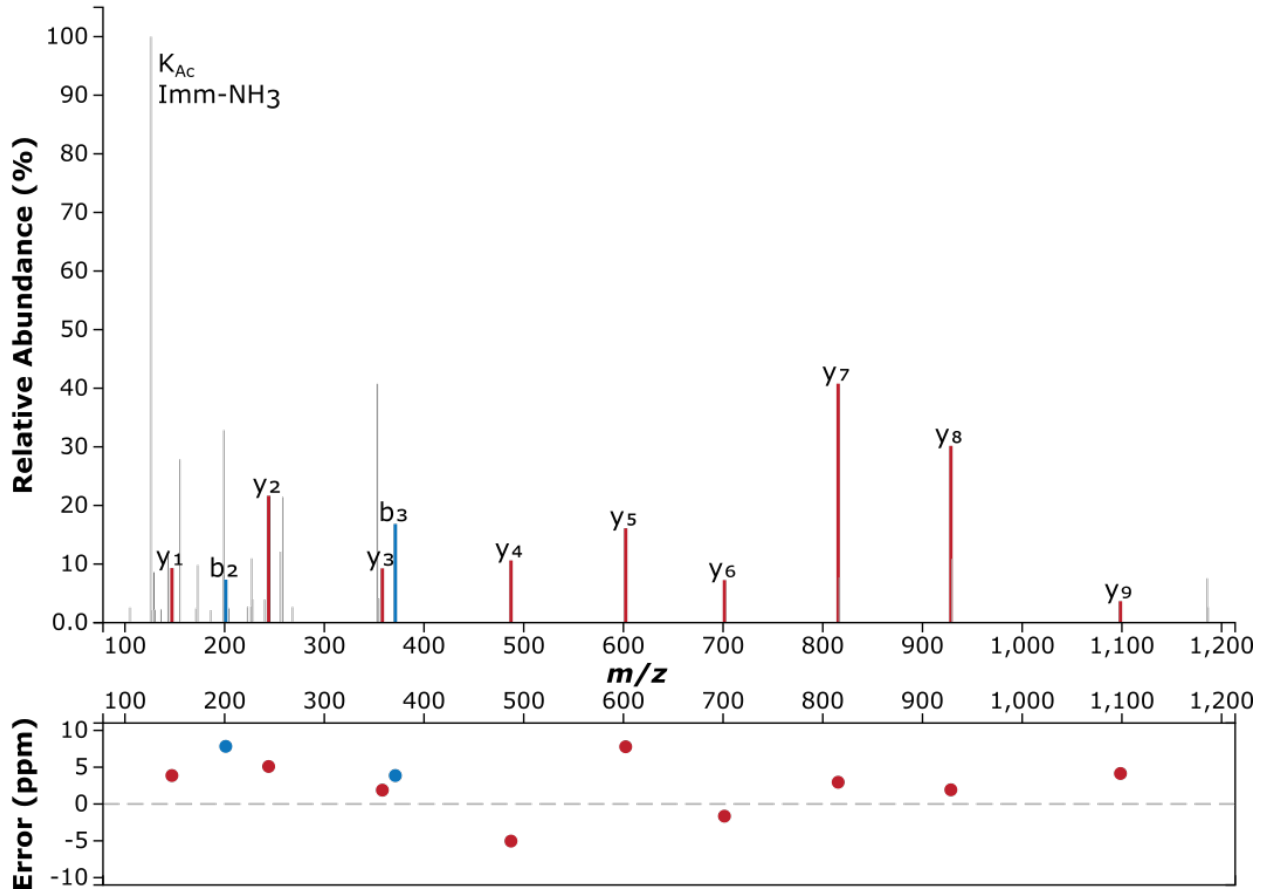

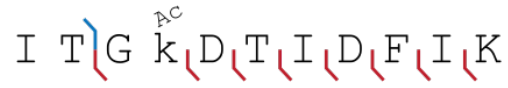

Precursor m/z: 646.8584

Charge: +2

6-oxocyclohex-1-ene-1-carboxyl-CoA hydrolase (Q2LXU2)

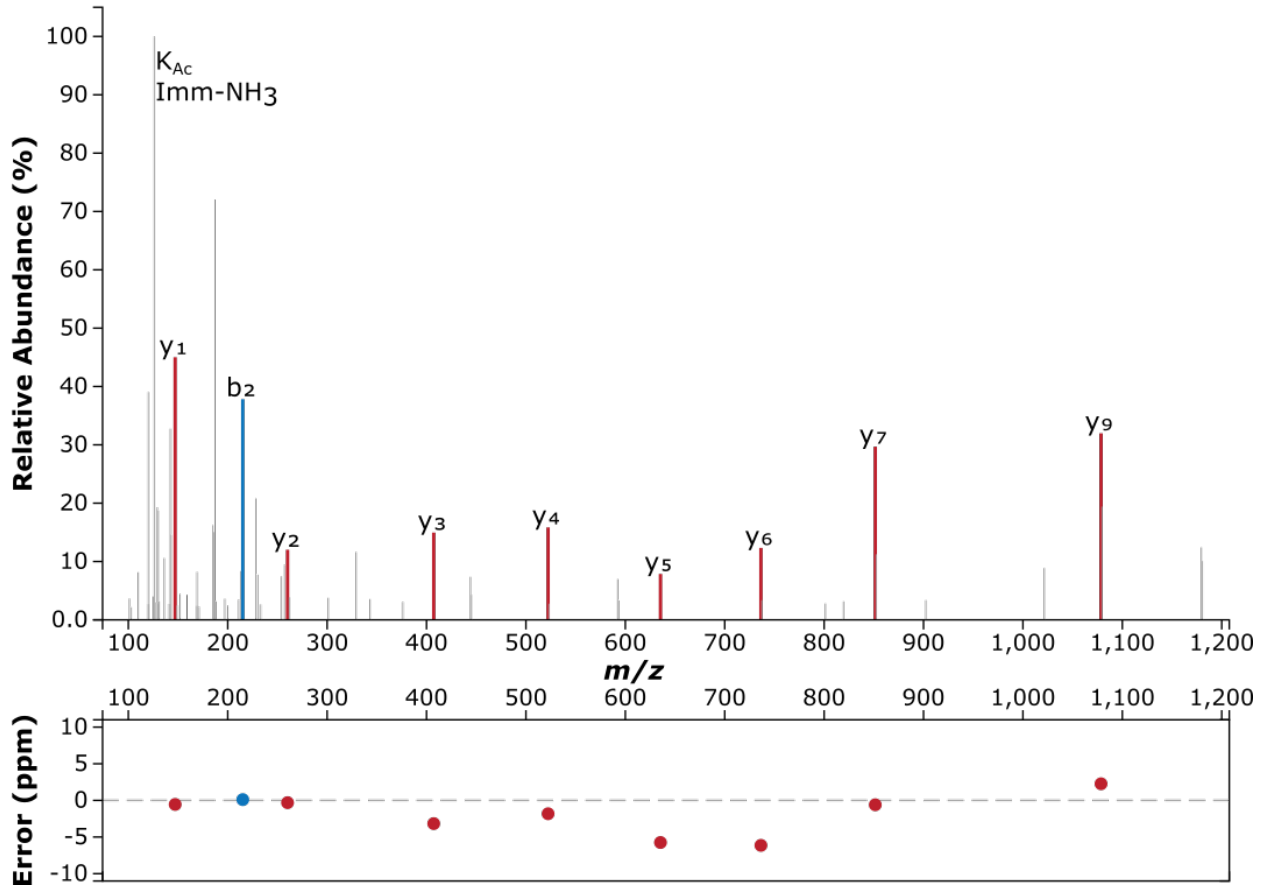

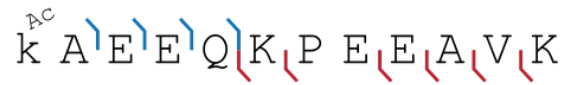

Precursor m/z: 476.5841 Charge: +3  
 Hypothetical exported protein (Q2LUP5)

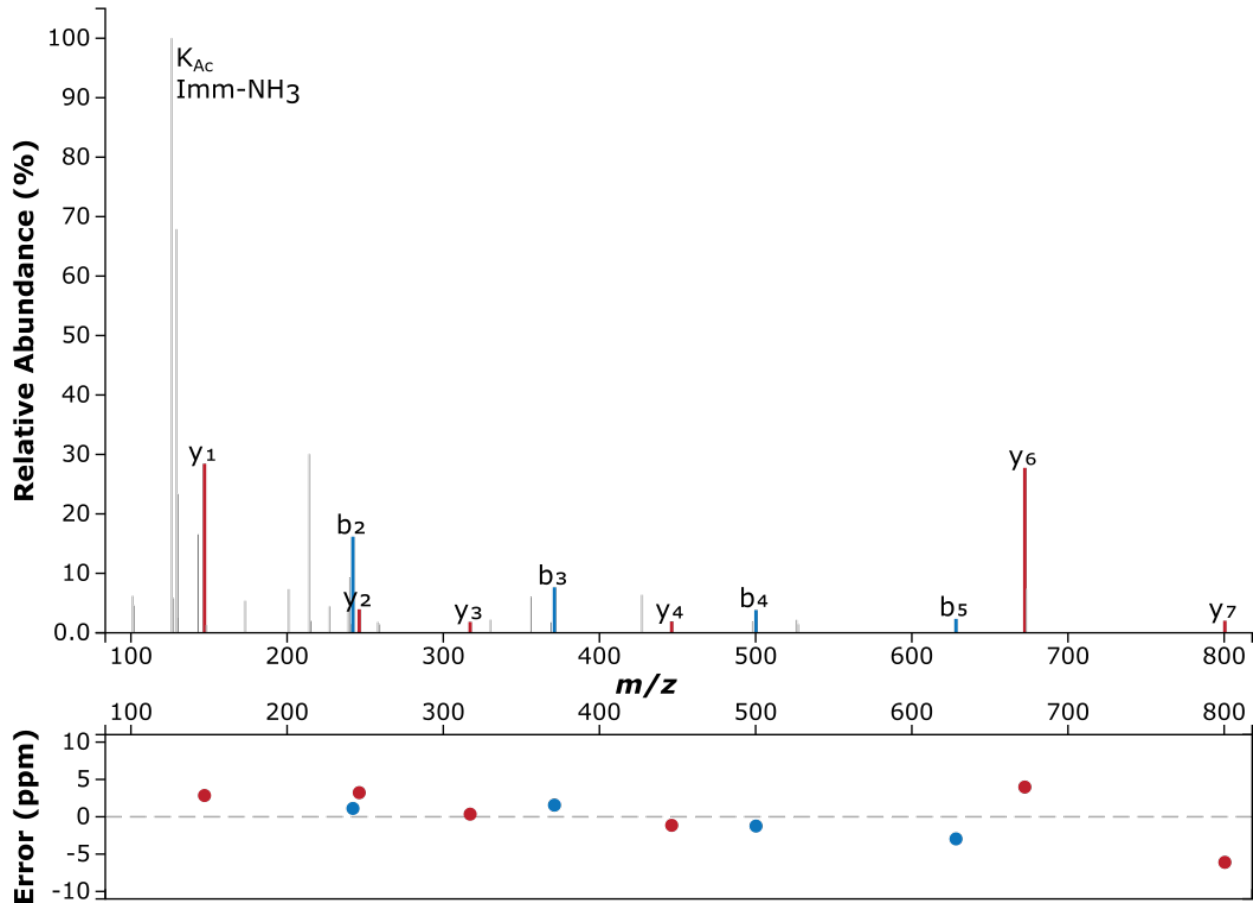

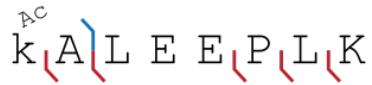

Precursor m/z: 485.2844

Charge: +2

60 kDa chaperonin 2 (Q2LTG7)

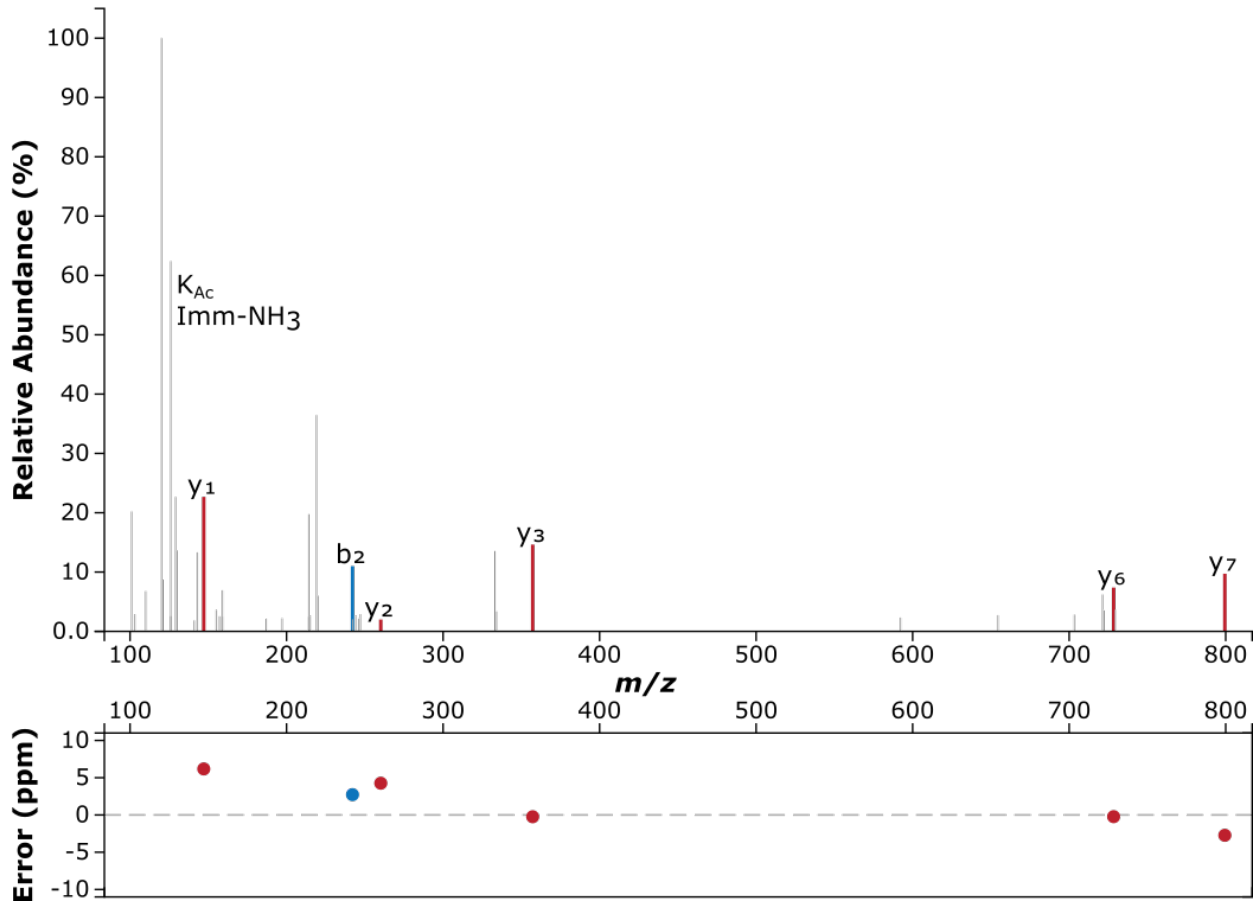

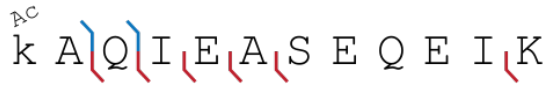

Precursor m/z: 708.3725 Charge: +2

ATP synthase subunit b (Q2LR00)

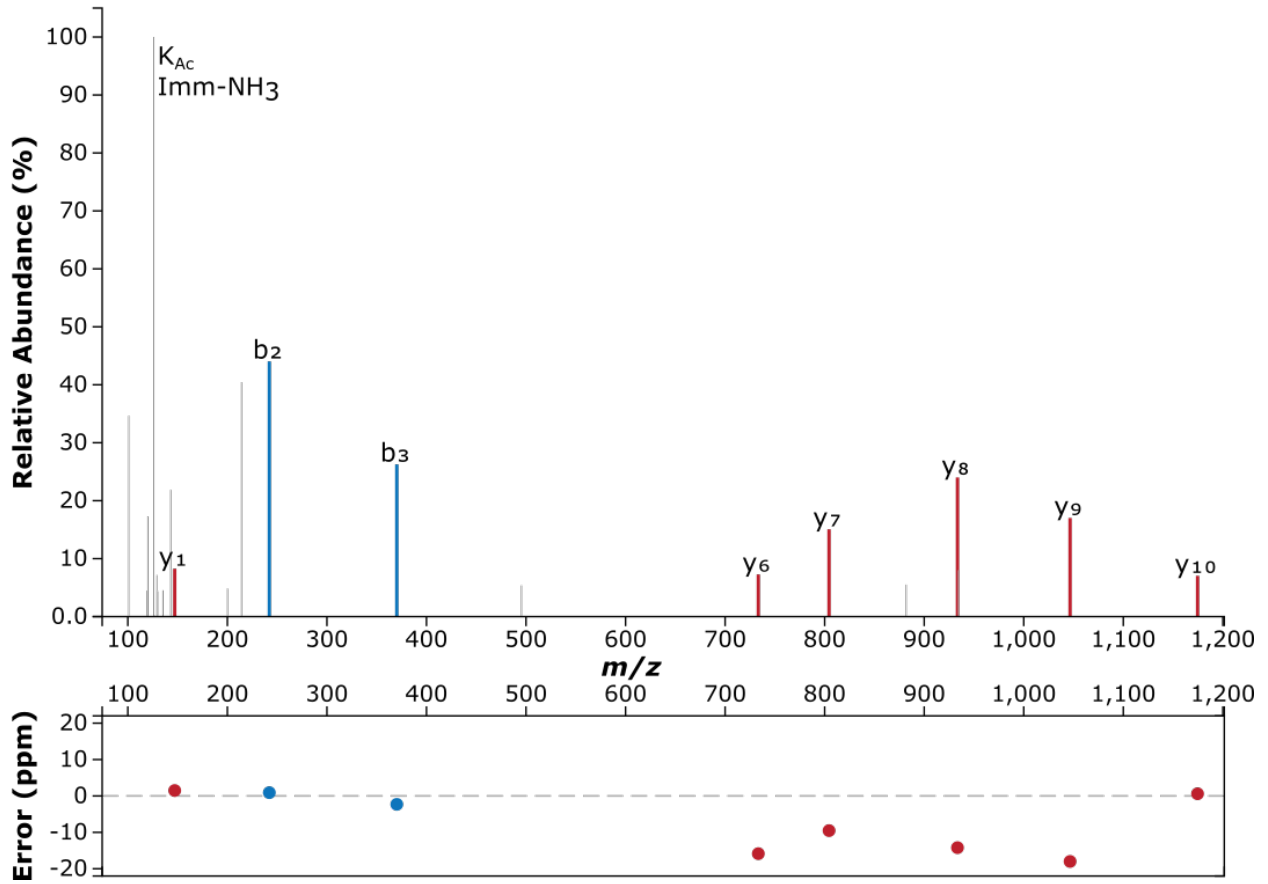

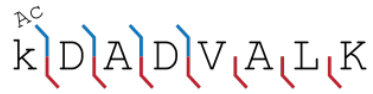

Precursor m/z: 451.2531

Charge: +2

Acetyl-CoA synthetase (Q2LWR8)

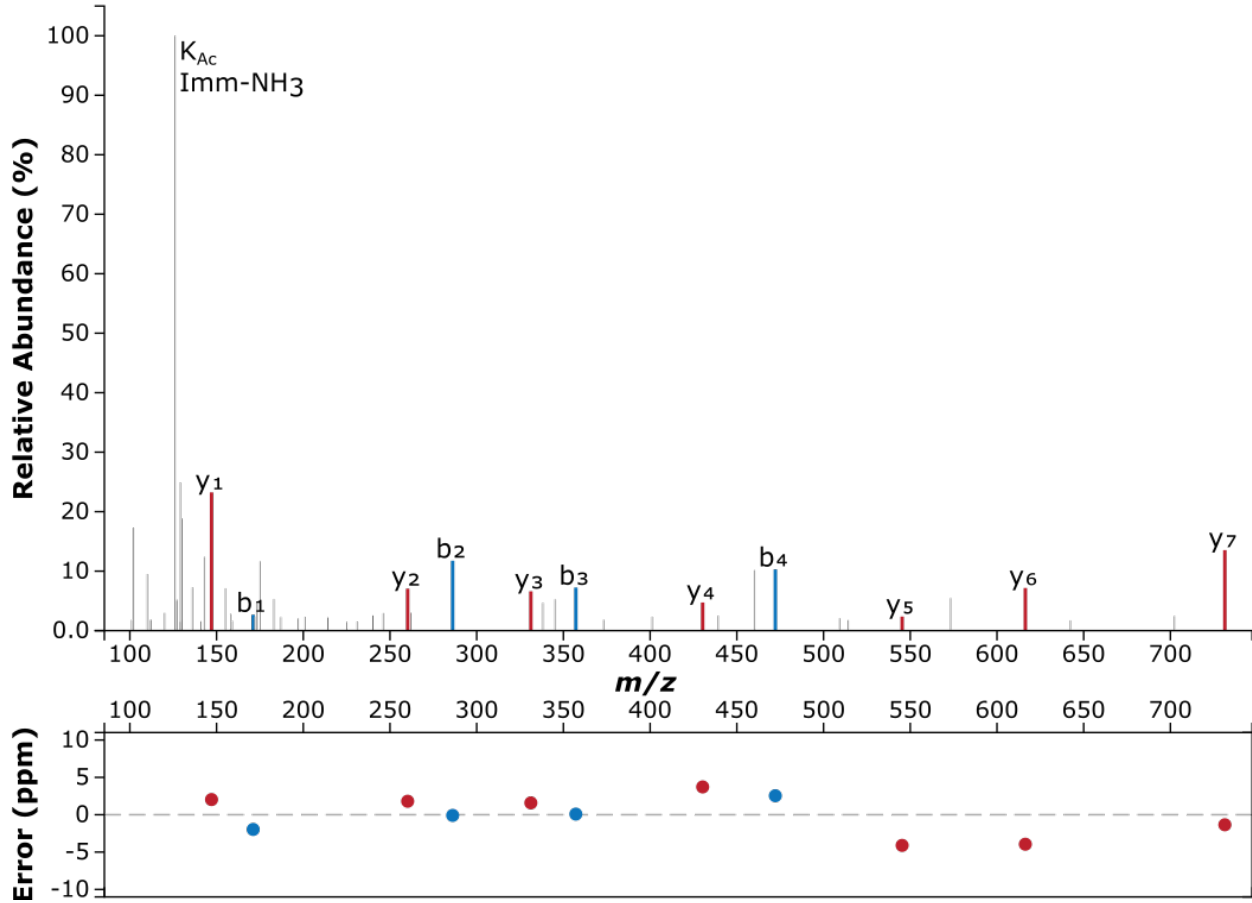

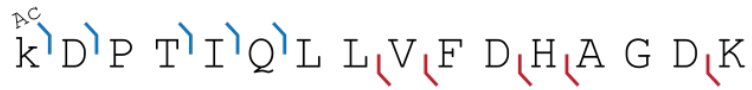

Precursor m/z: 613.6597 Charge: +3

Putative enoyl-CoA hydratase (Q2LXU6)

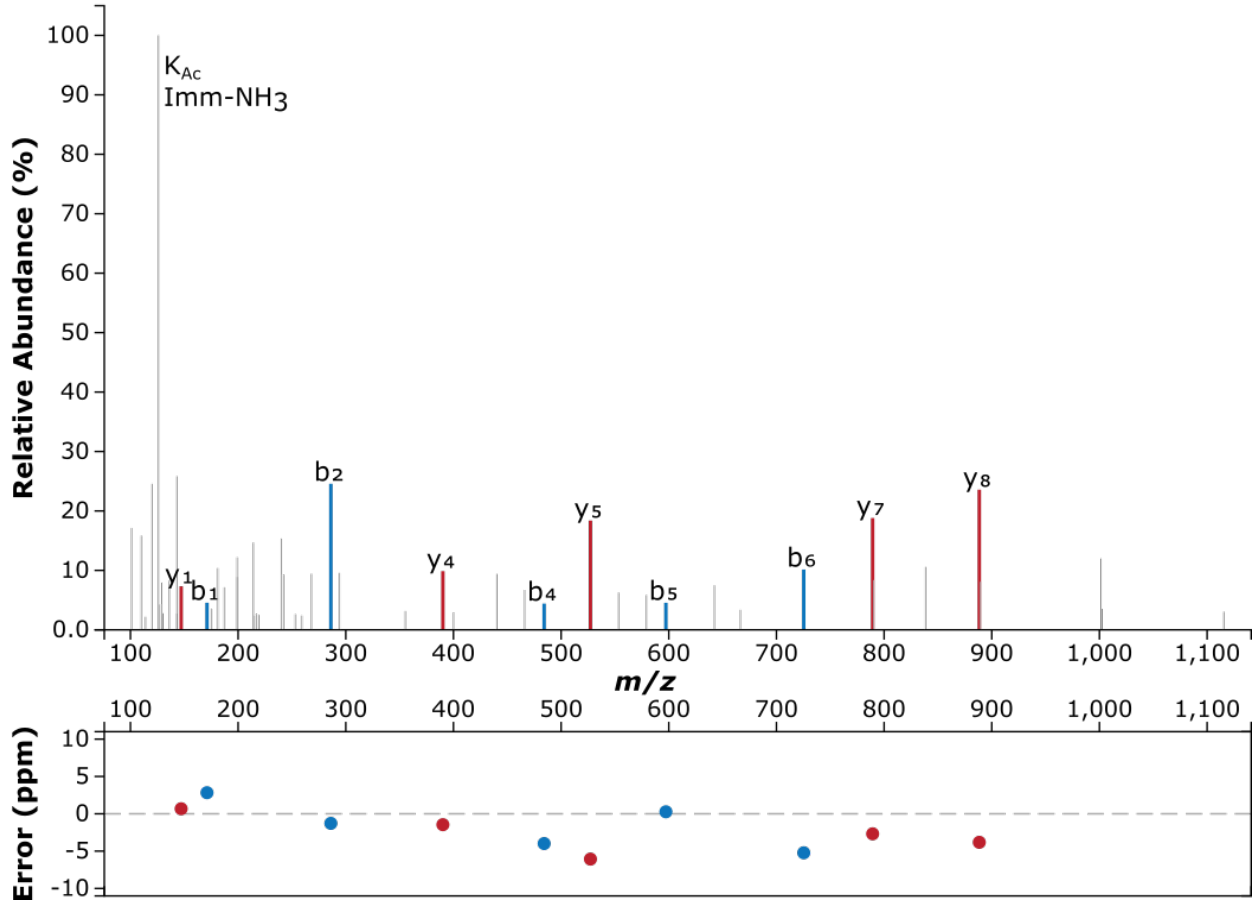

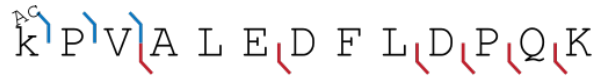

Precursor m/z: 771.4141 Charge: +2

Acetyl-CoA acetyltransferase (Q2LXR7)

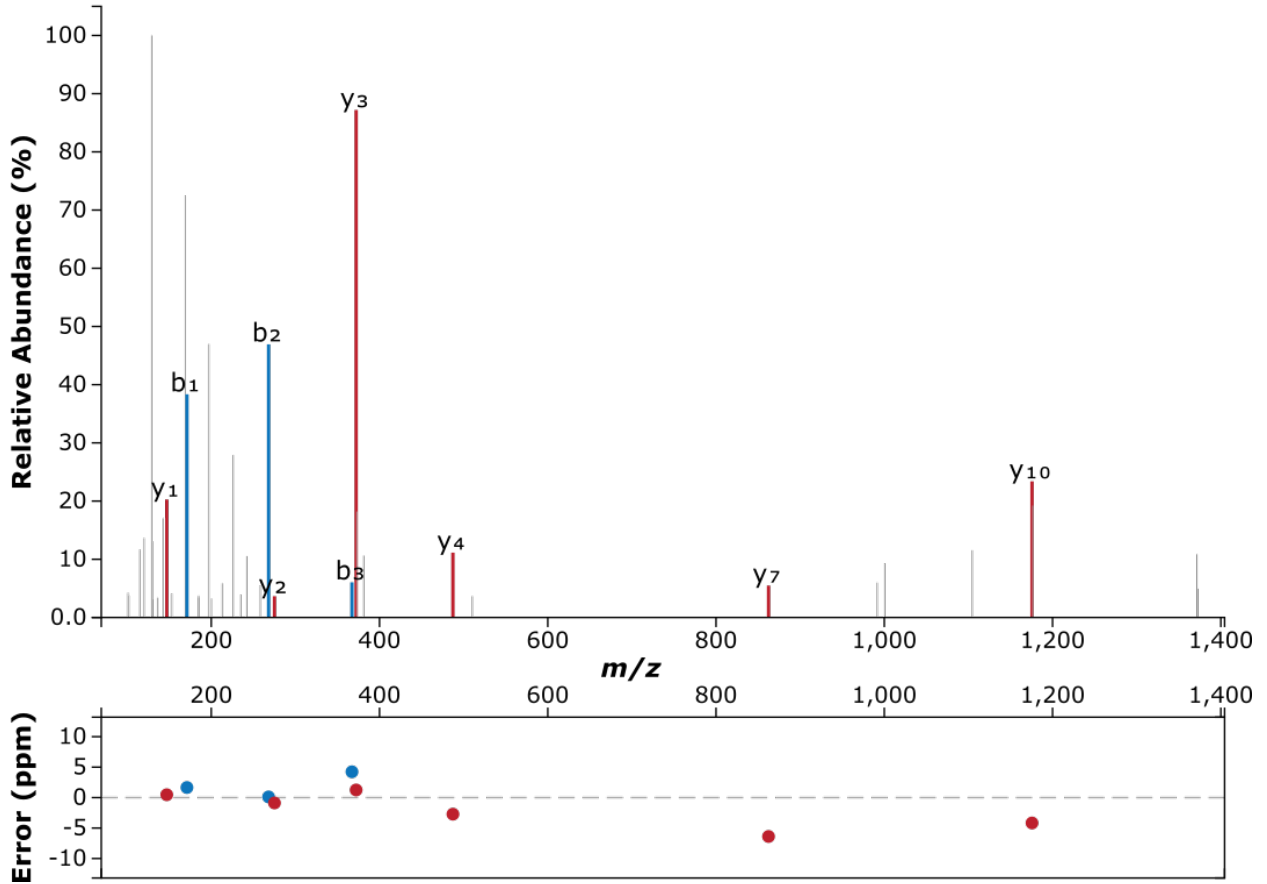



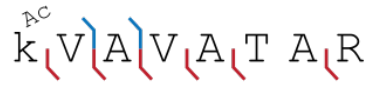

Precursor m/z: 429.2638

Charge: +2

Fe-S oxidoreductase (Q2LT65)

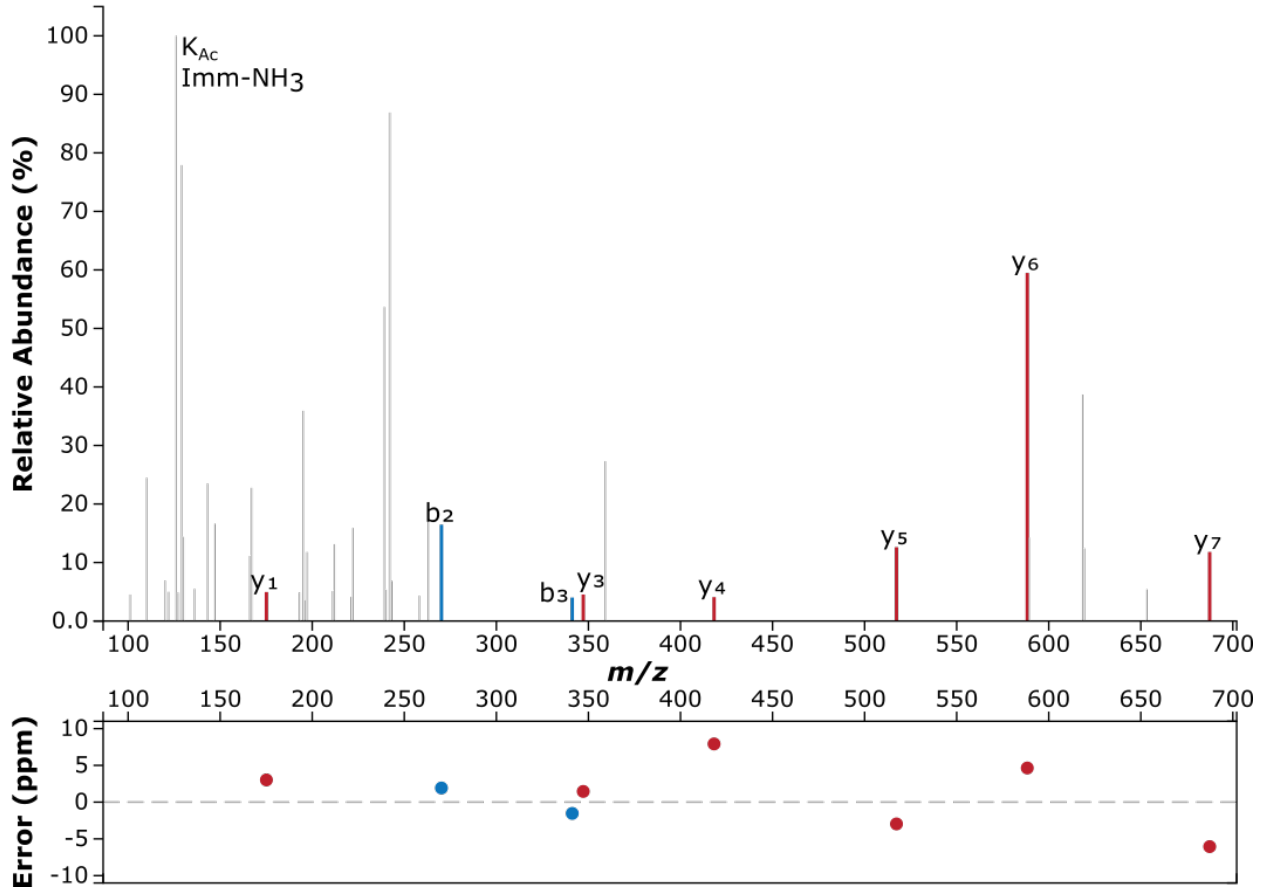

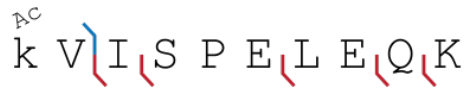

Precursor m/z: 606.8453      Charge: +2  
 ATP synthase subunit alpha 1 (Q2LQZ7)

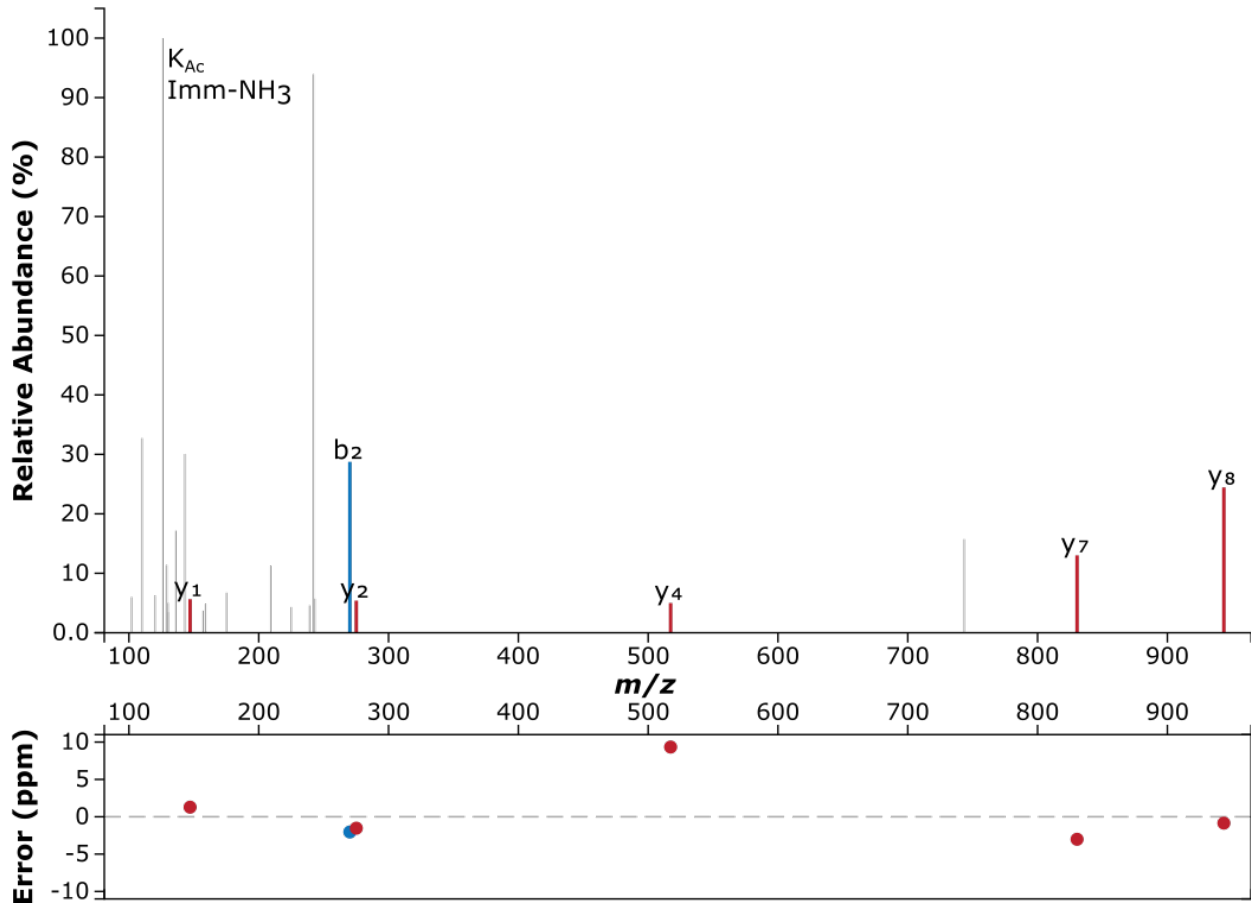

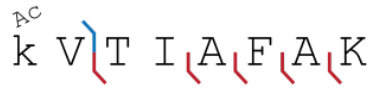

Precursor m/z: 460.2842 Charge: +2

Iron-sulphur-binding reductase (Q2LWR1)

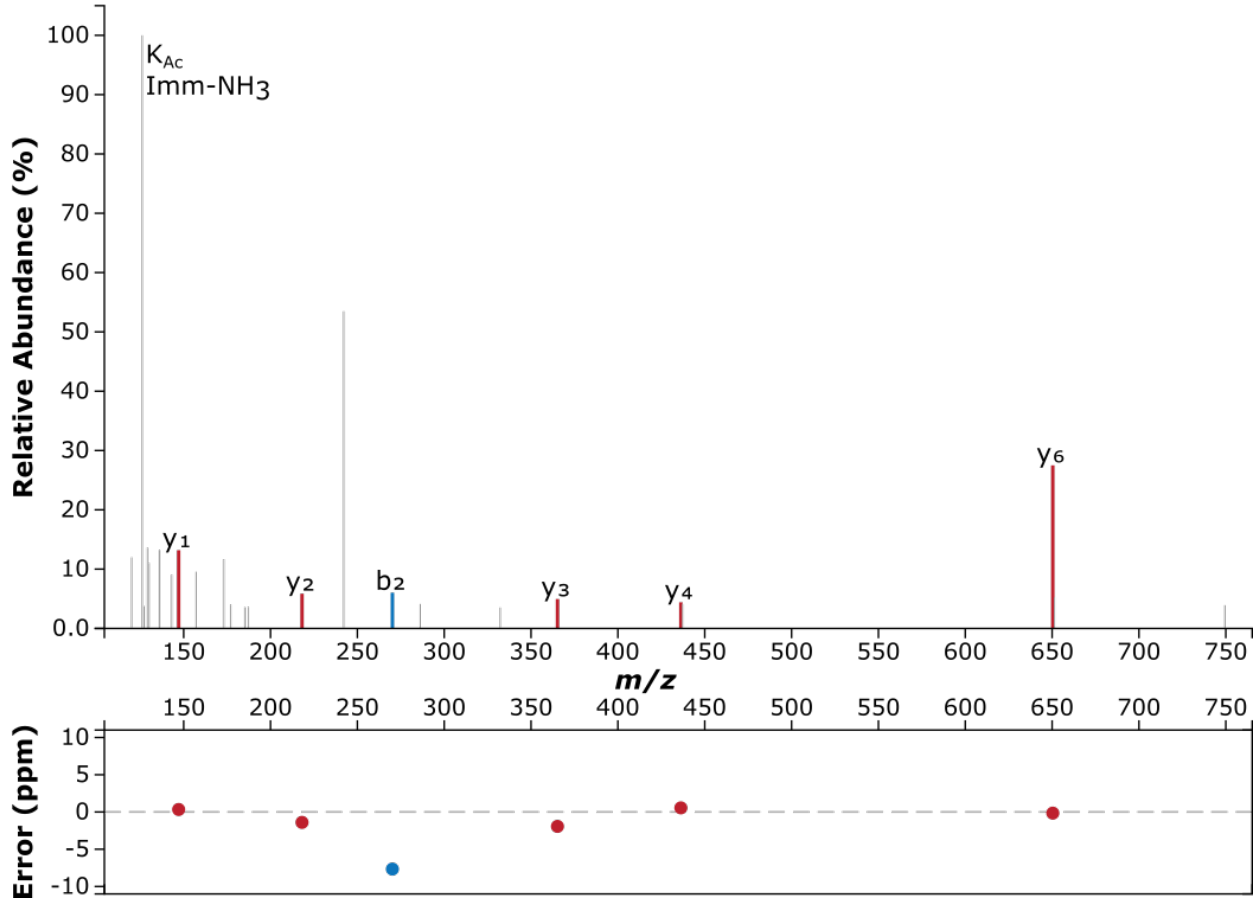

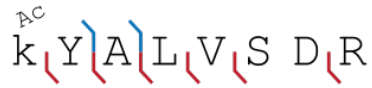

Precursor m/z: 497.2718 Charge: +2

ATP synthase gamma chain (Q2LQZ6)

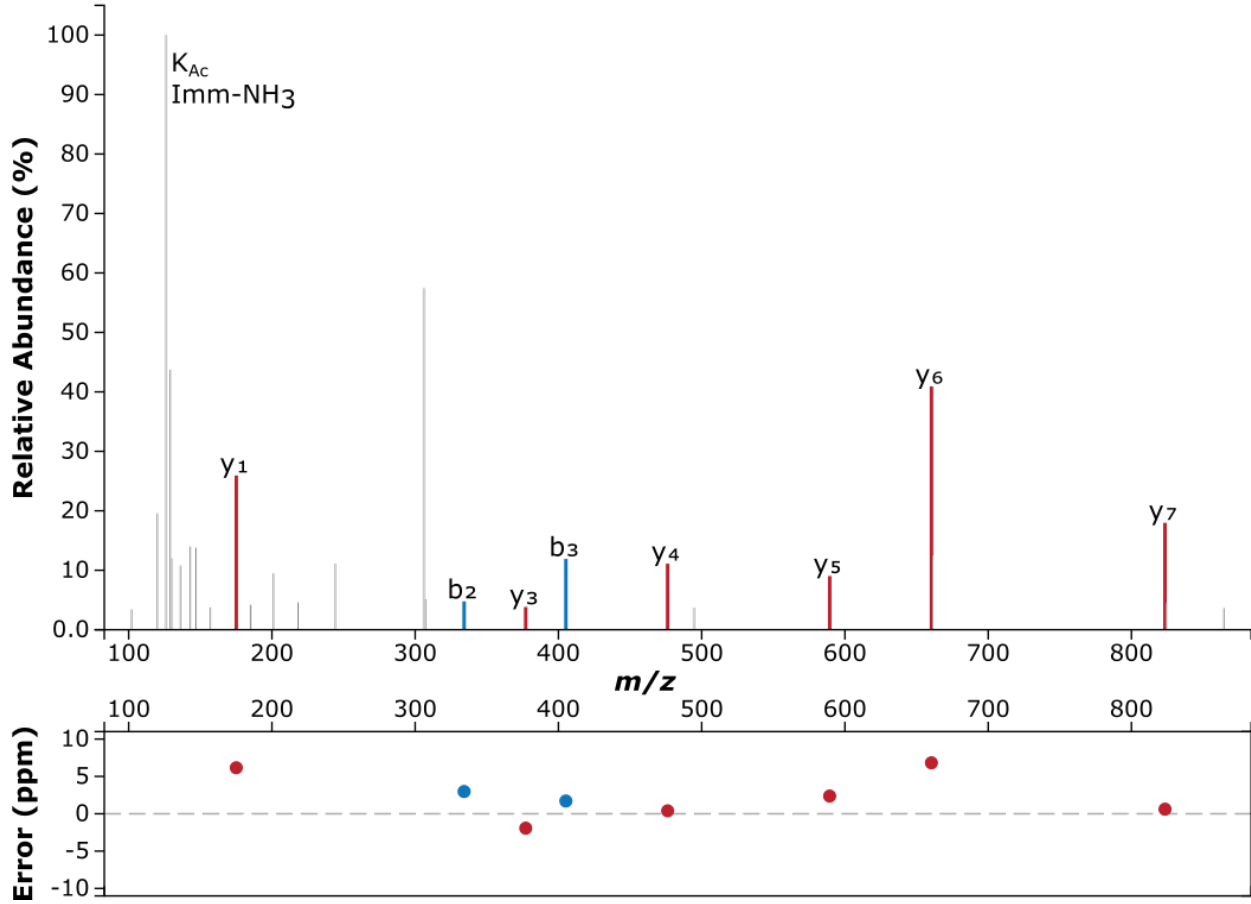

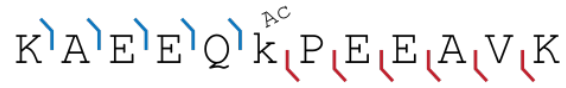

Precursor m/z: 476.5841 Charge: +3

Hypothetical exported protein (Q2LUP5)

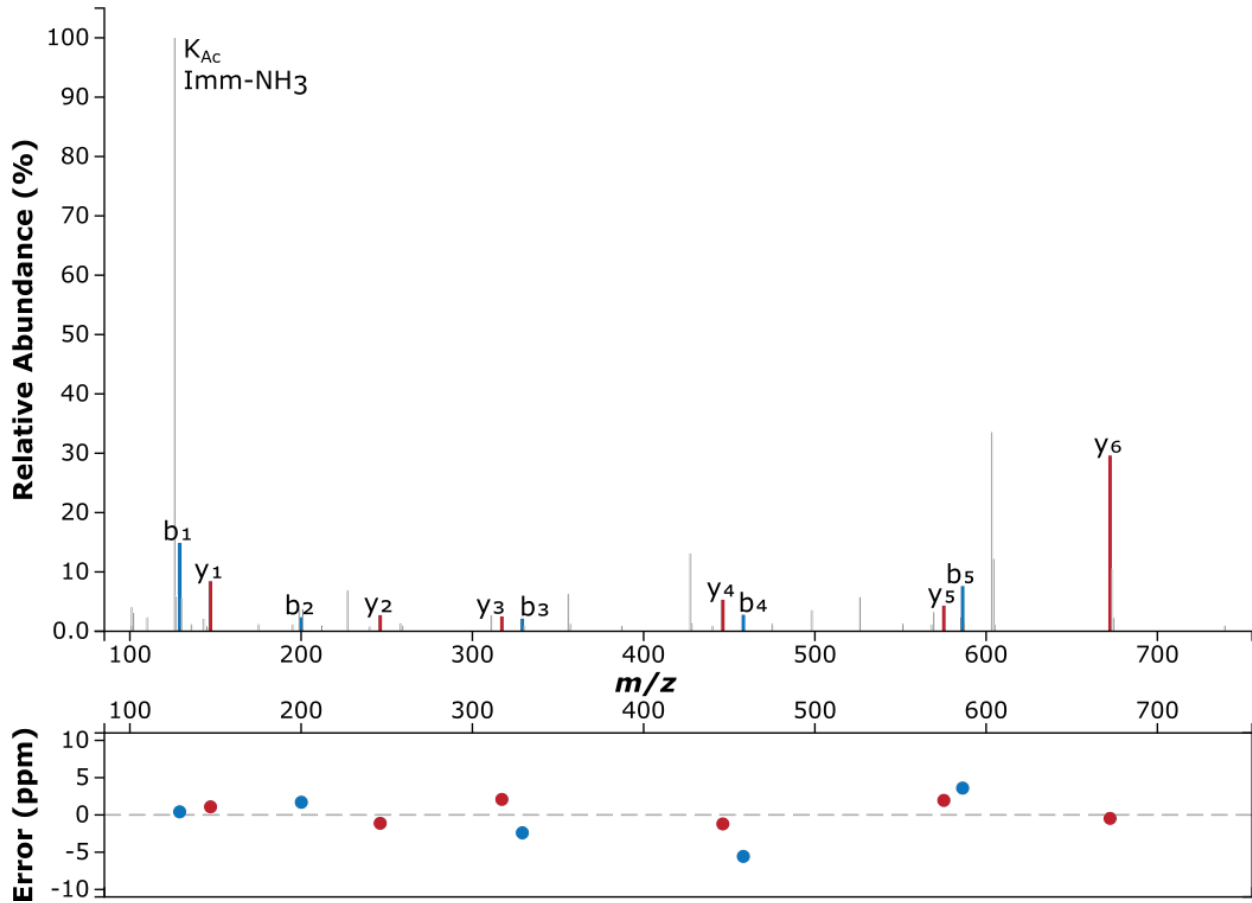

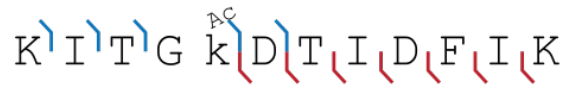

Precursor m/z: 474.2730

Charge: +3

6-oxocyclohex-1-ene-1-carboxyl-CoA hydrolase (Q2LXU2)

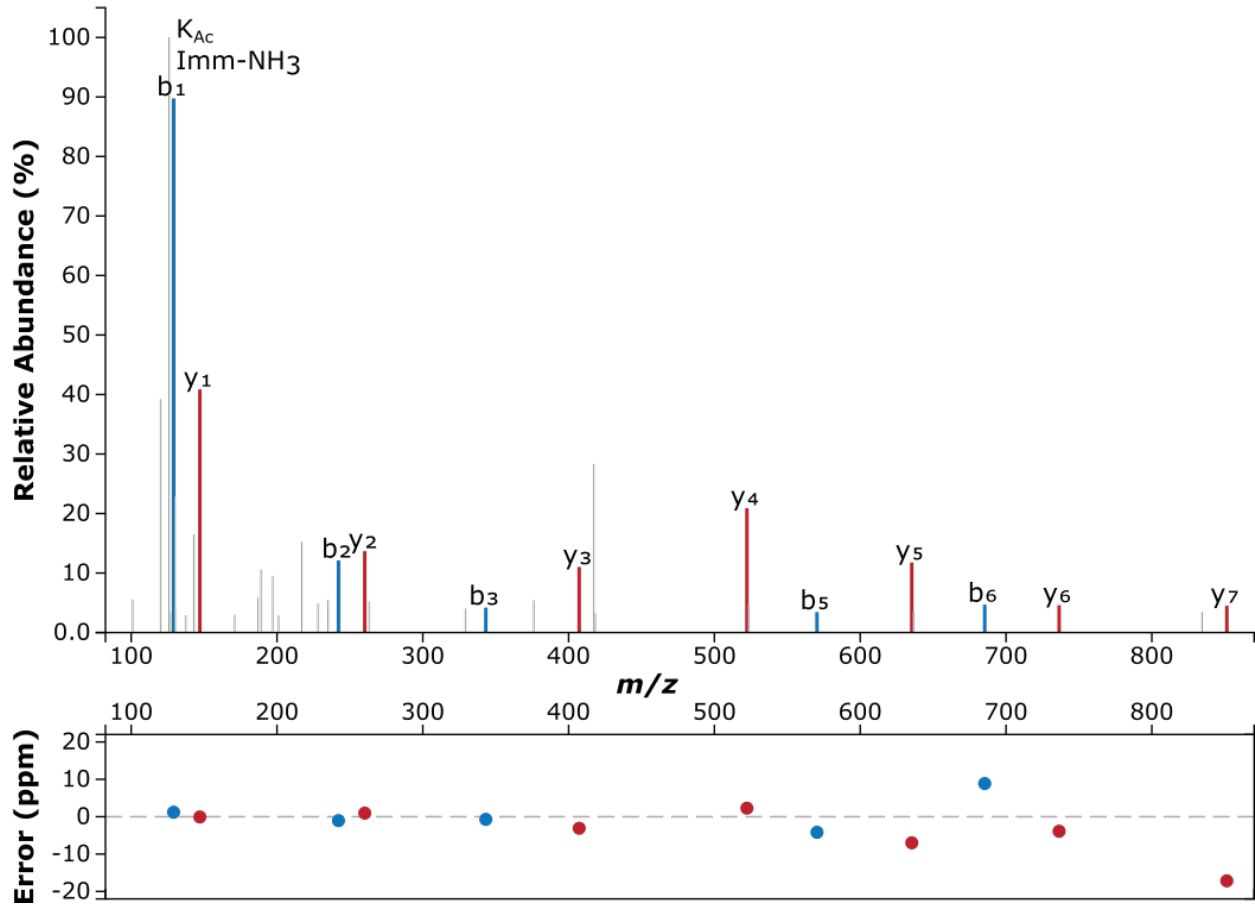

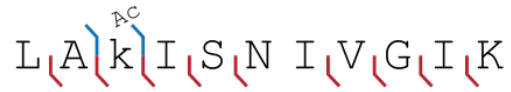

Precursor m/z: 599.3819      Charge: +2  
 4-hydroxy-tetrahydrodipicolinate synthase (Q2LTA1)

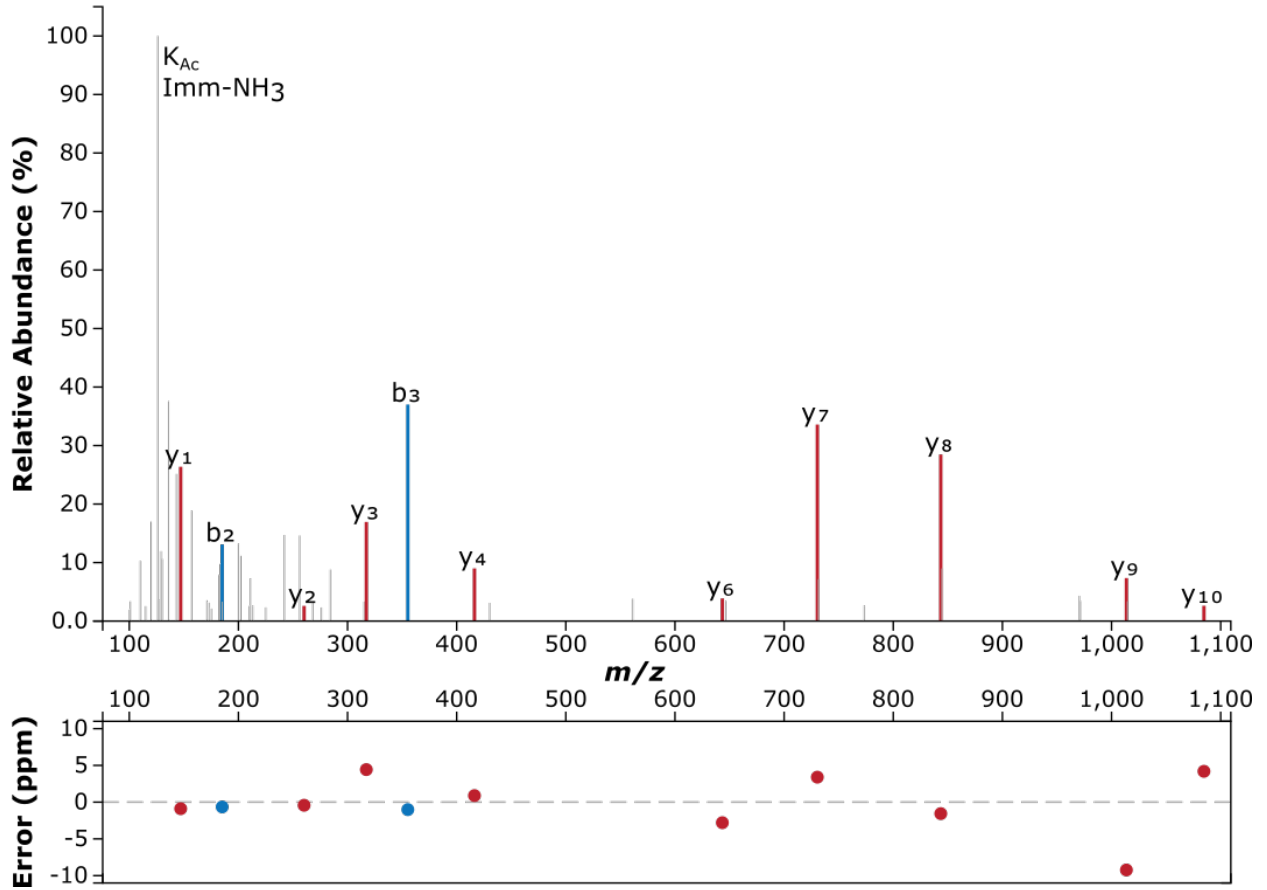

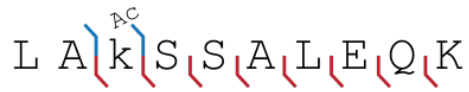

Precursor m/z: 558.8166

Charge: +2

ATP synthase subunit b (Q2LR00)

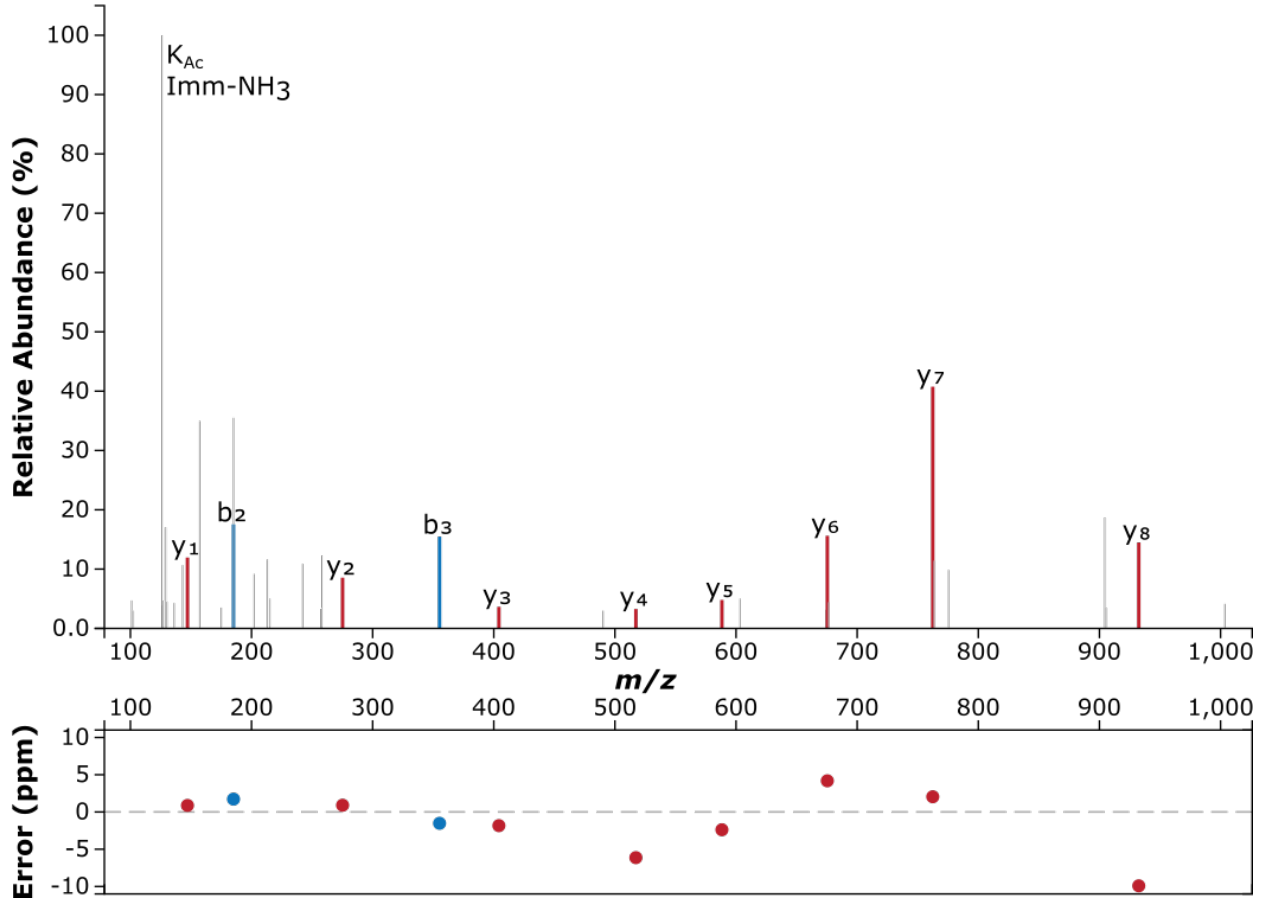



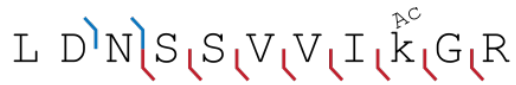

Precursor m/z: 615.3460 Charge: +2  
 Mechanosensitive ion channel (Q2LX89)

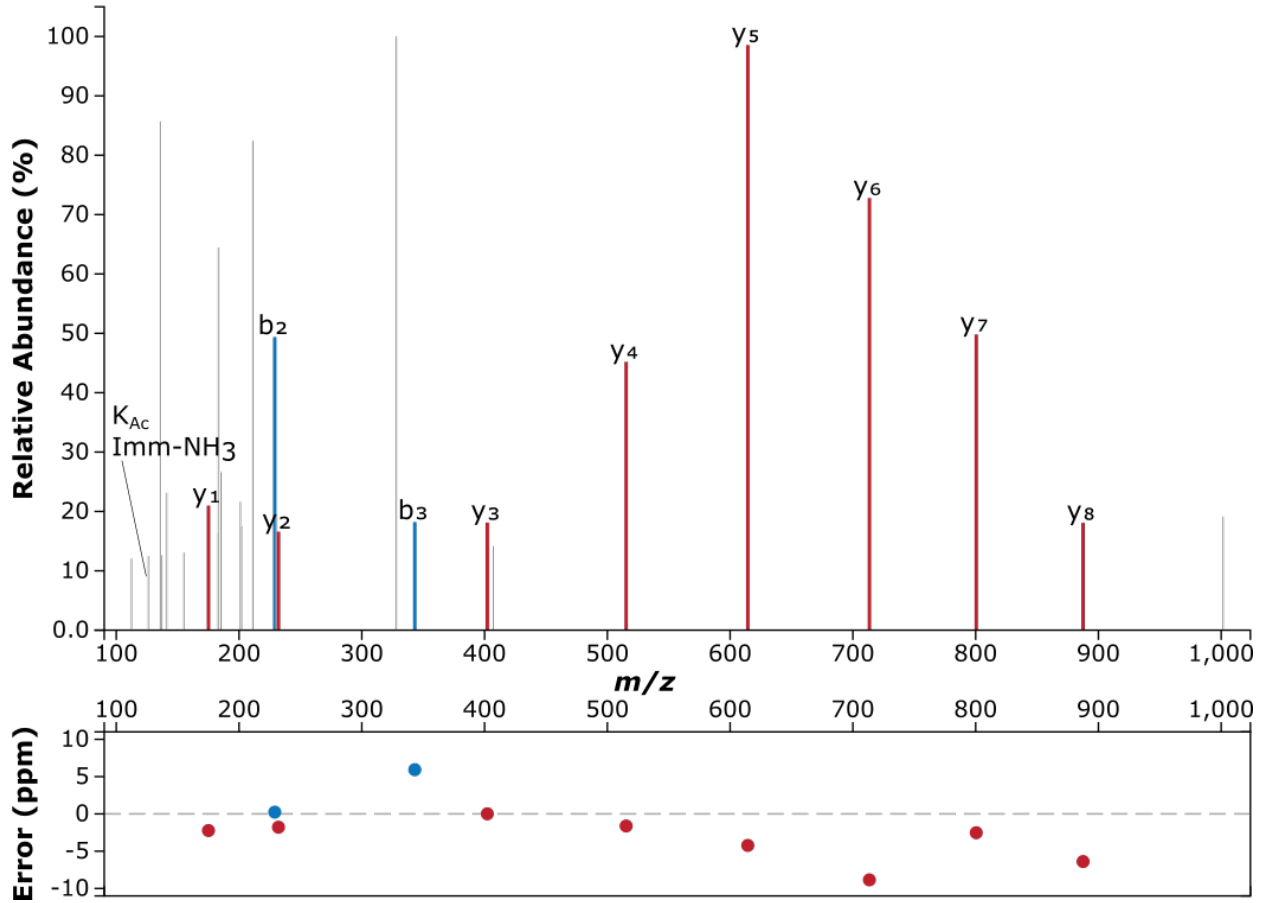

L G D V K P G S S G k<sup>Ac</sup> P V P G Y E E K

Precursor m/z: 662.6775

Charge: +3

4-hydroxybenzoate-CoA ligase / benzoate-CoA ligase (Q2LRH0)

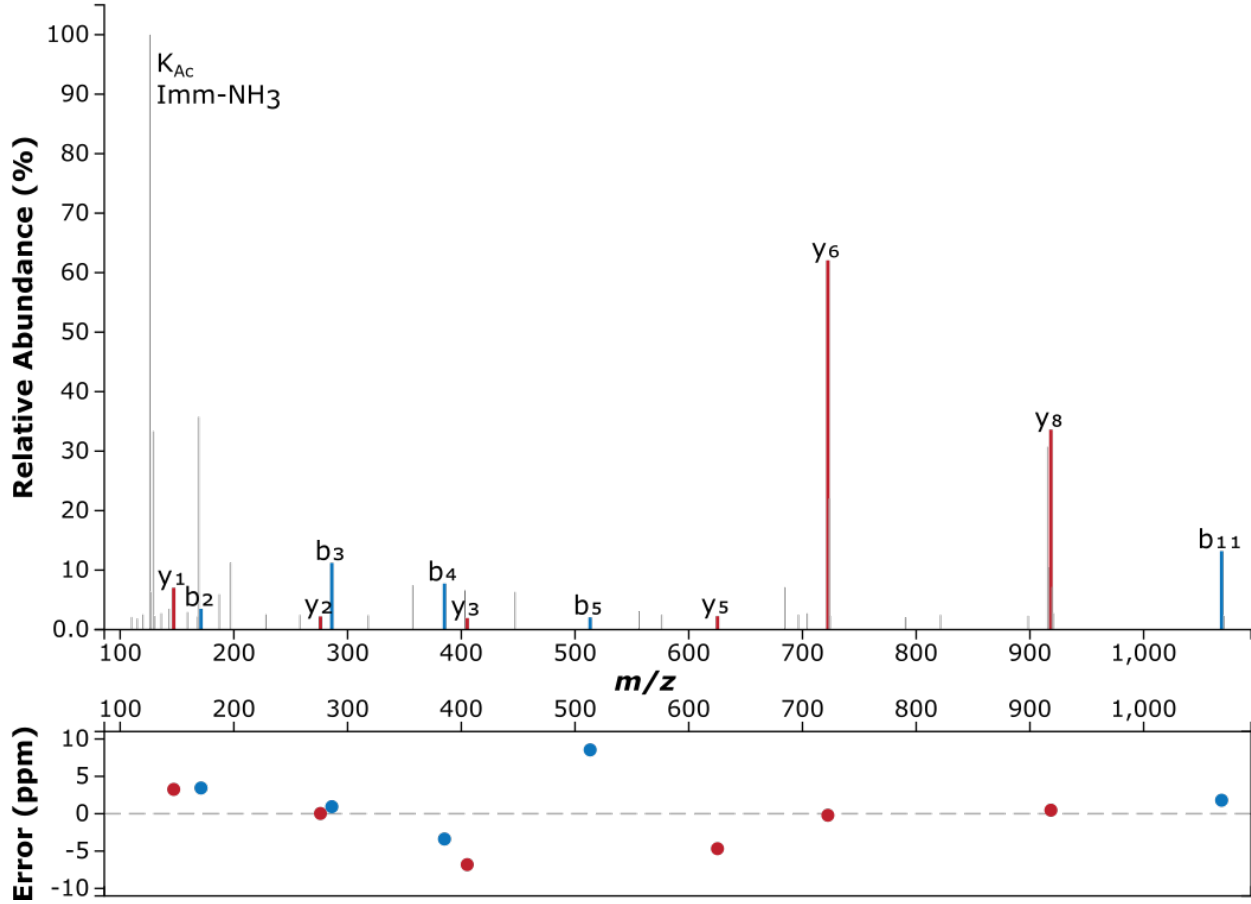

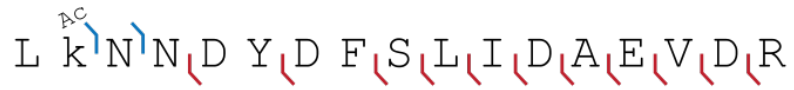

Precursor m/z: 1,034.9947 Charge: +2

6-oxocyclohex-1-ene-1-carboxyl-CoA hydrolase (Q2LXU2)

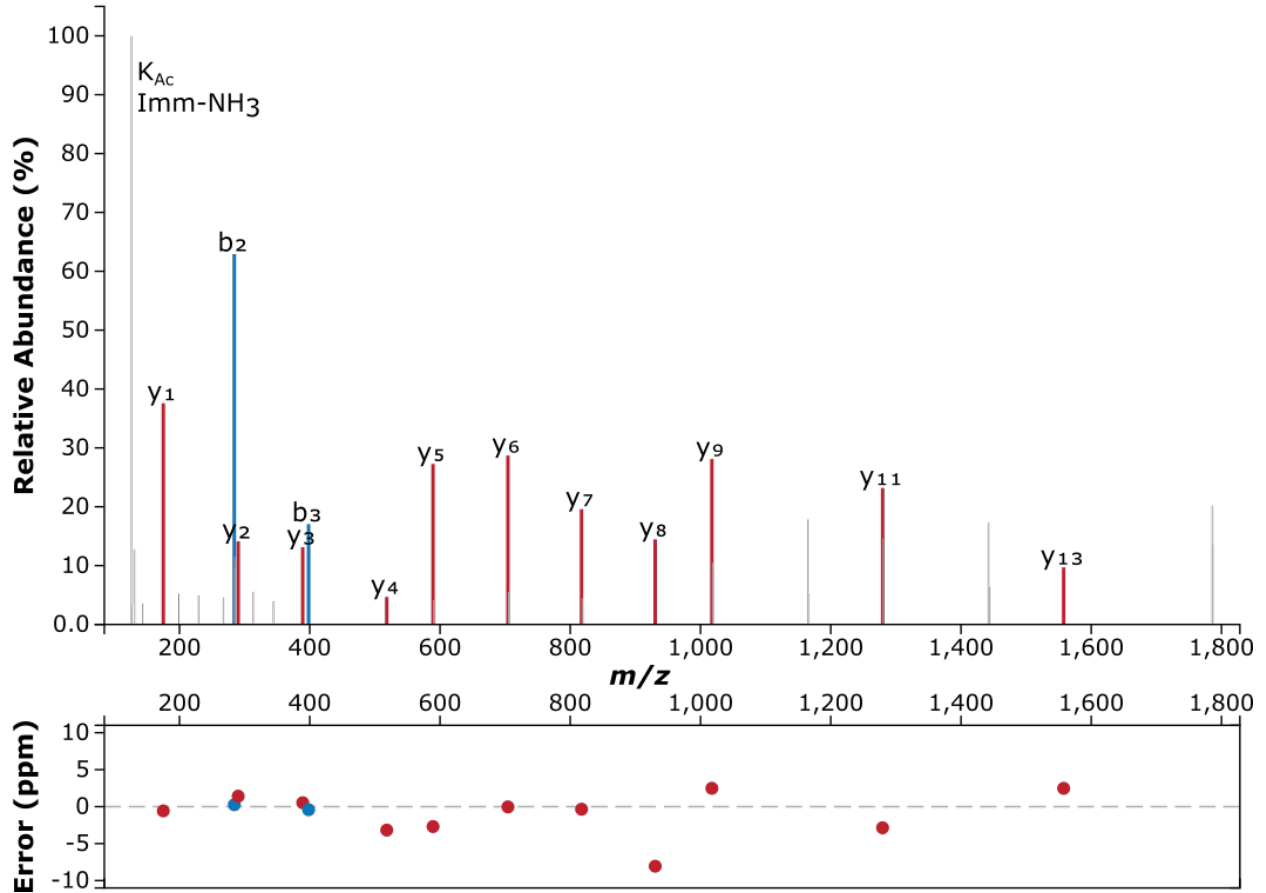

L P E Q H<sup>AC</sup> k F Y A N R

Precursor m/z: 482.2492

Charge: +3

Glutaconyl-CoA decarboxylase A subunit (Q2LUY7)

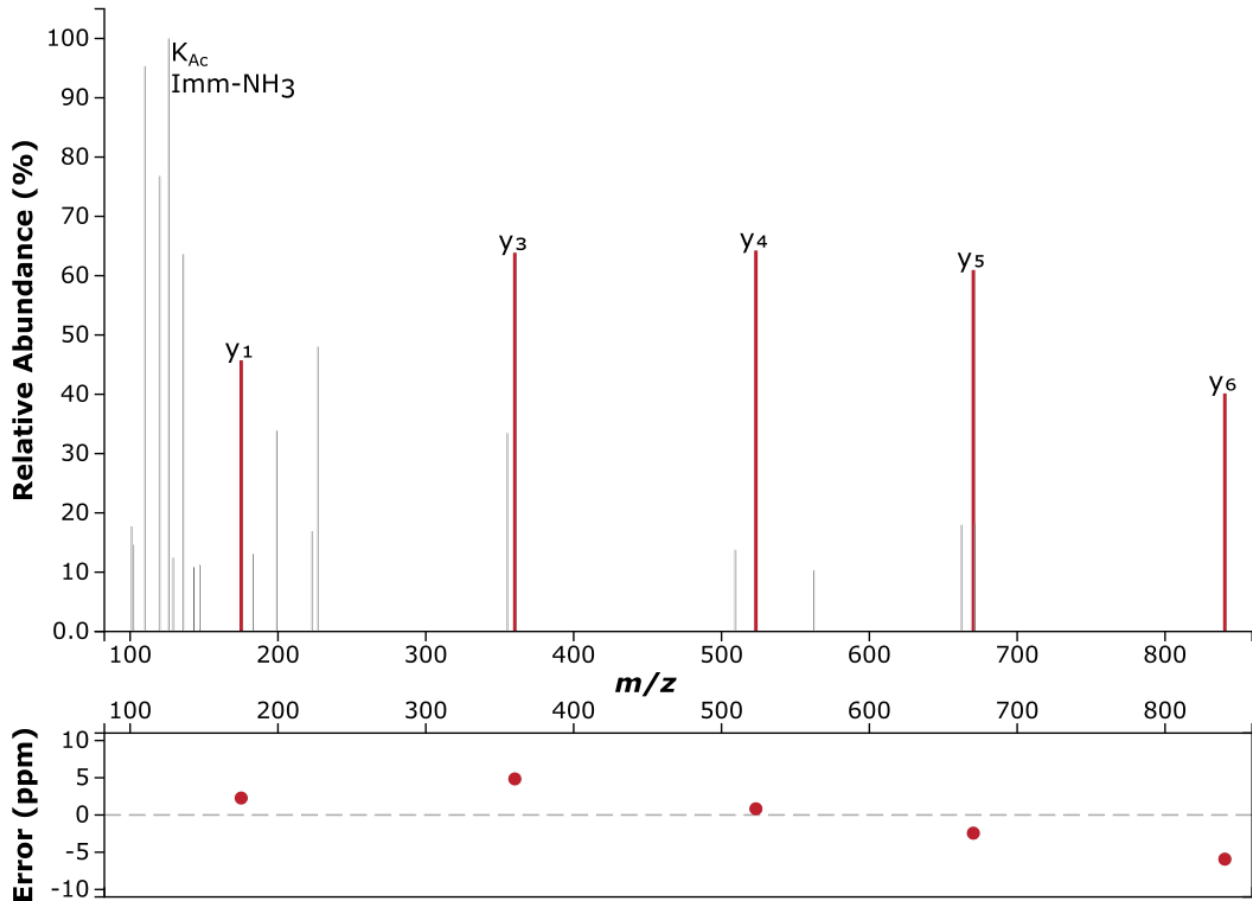

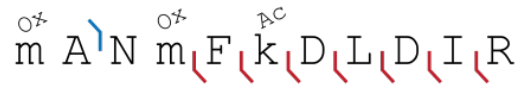

Precursor m/z: 476.5601

Charge: +3

4-hydroxybenzoate-CoA ligase / benzoate-CoA ligase (Q2LRH0)

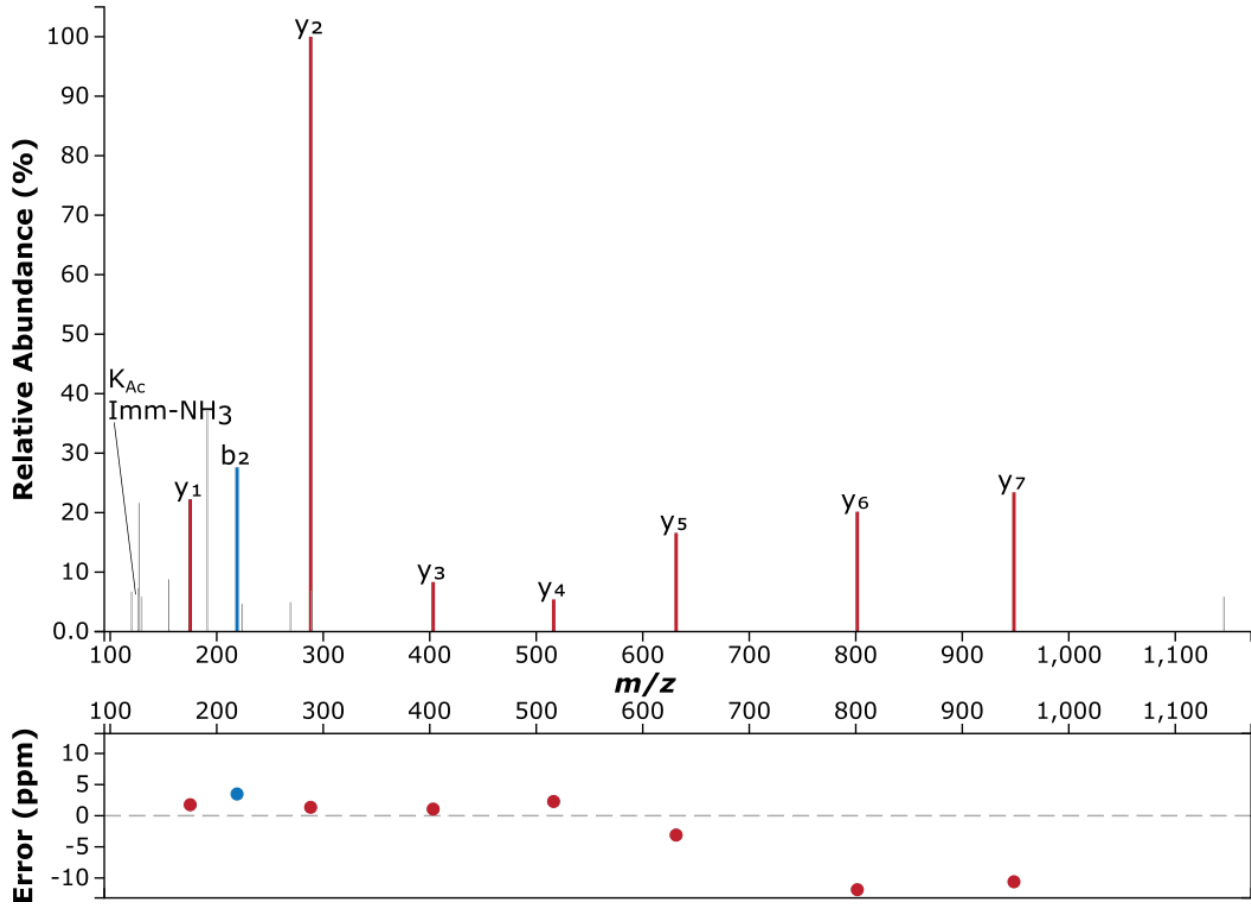

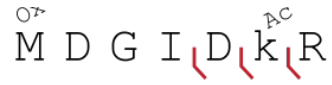

Precursor m/z: 446.7133

Charge: +2

Transcriptional regulator AsnC family (Q2LQV4)

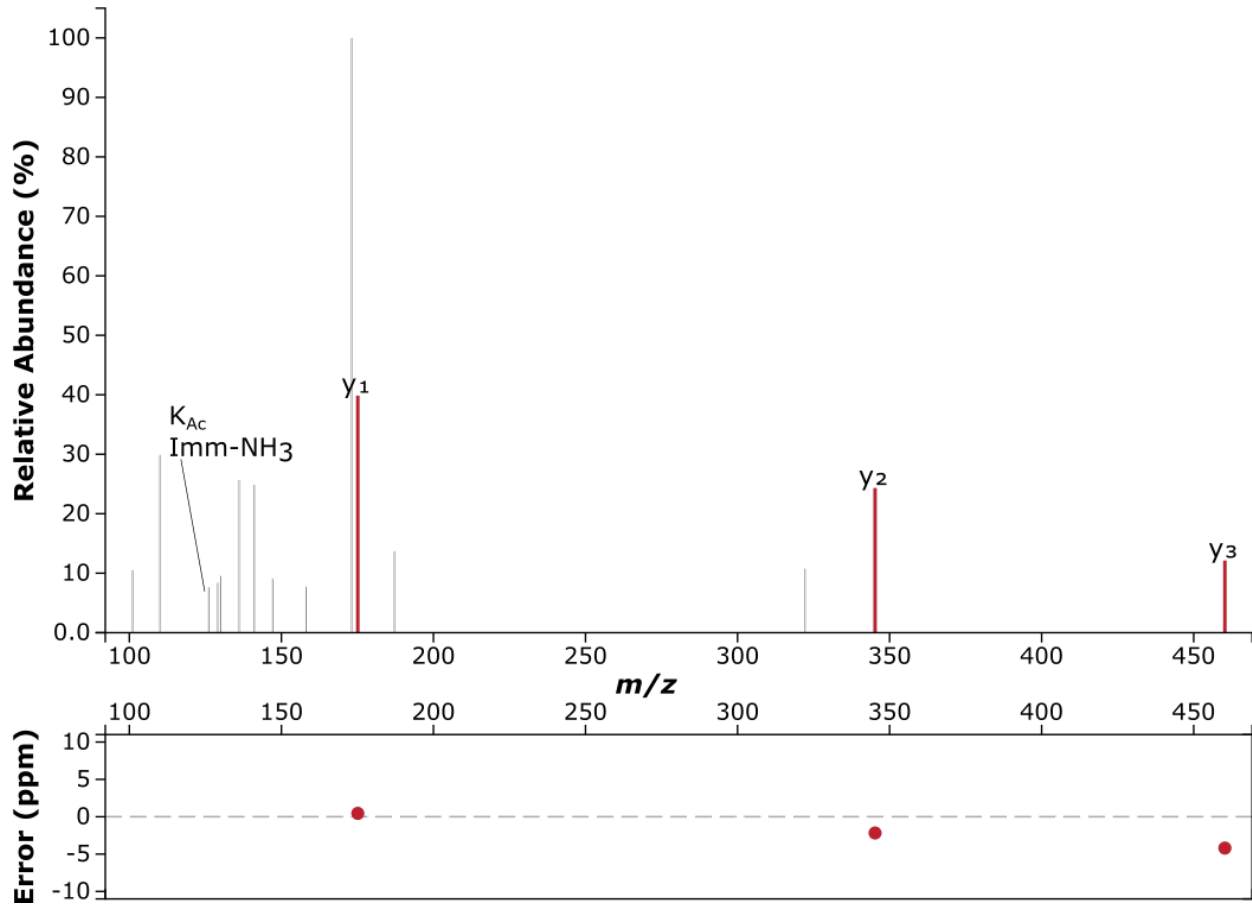

N L E V L k K

Precursor m/z: 443.2738

Charge: +2

3-dehydroquinase synthase (Q2LUD2)

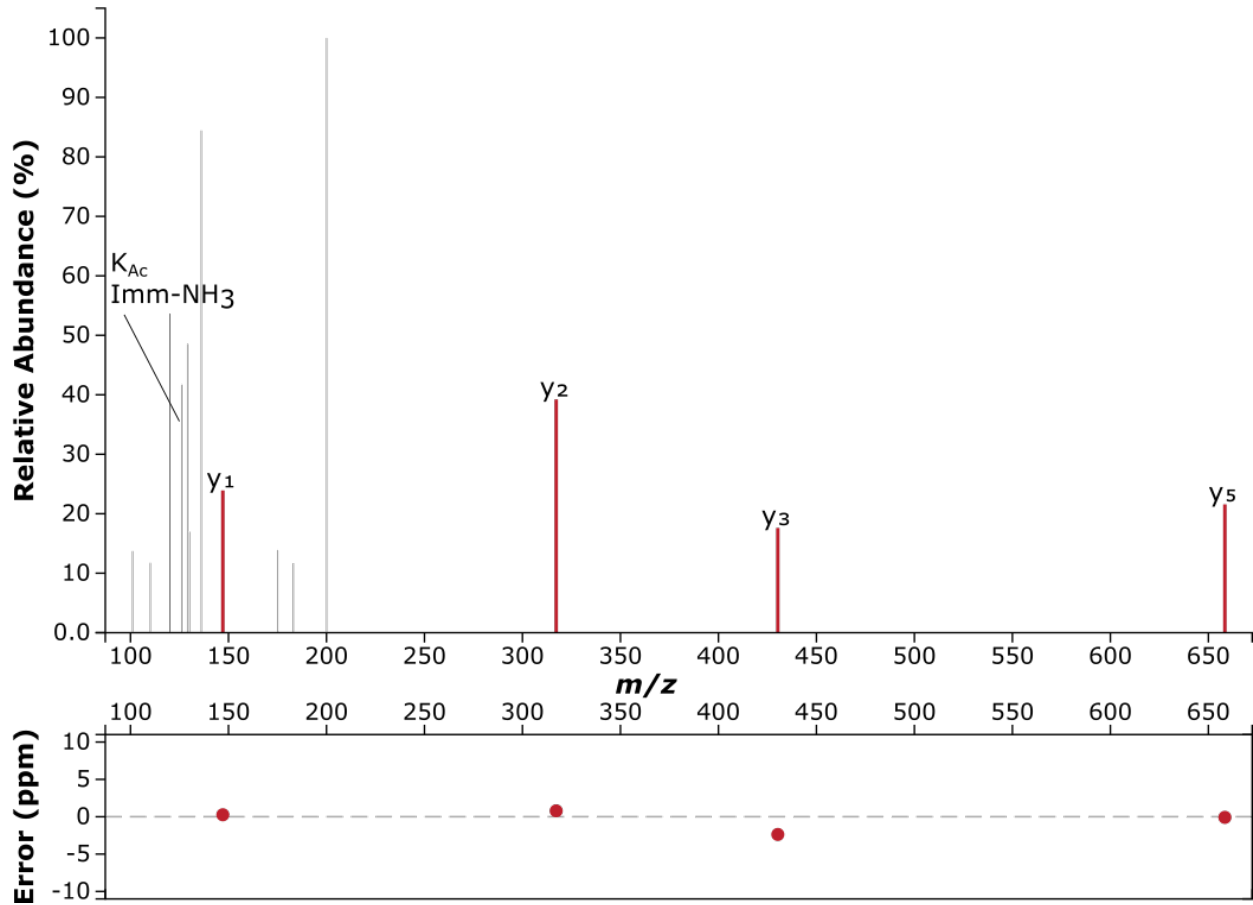

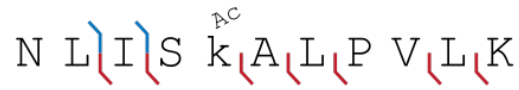

Precursor m/z: 619.3975

Charge: +2

6-oxocyclohex-1-ene-1-carboxyl-CoA hydrolase (Q2LXU2)

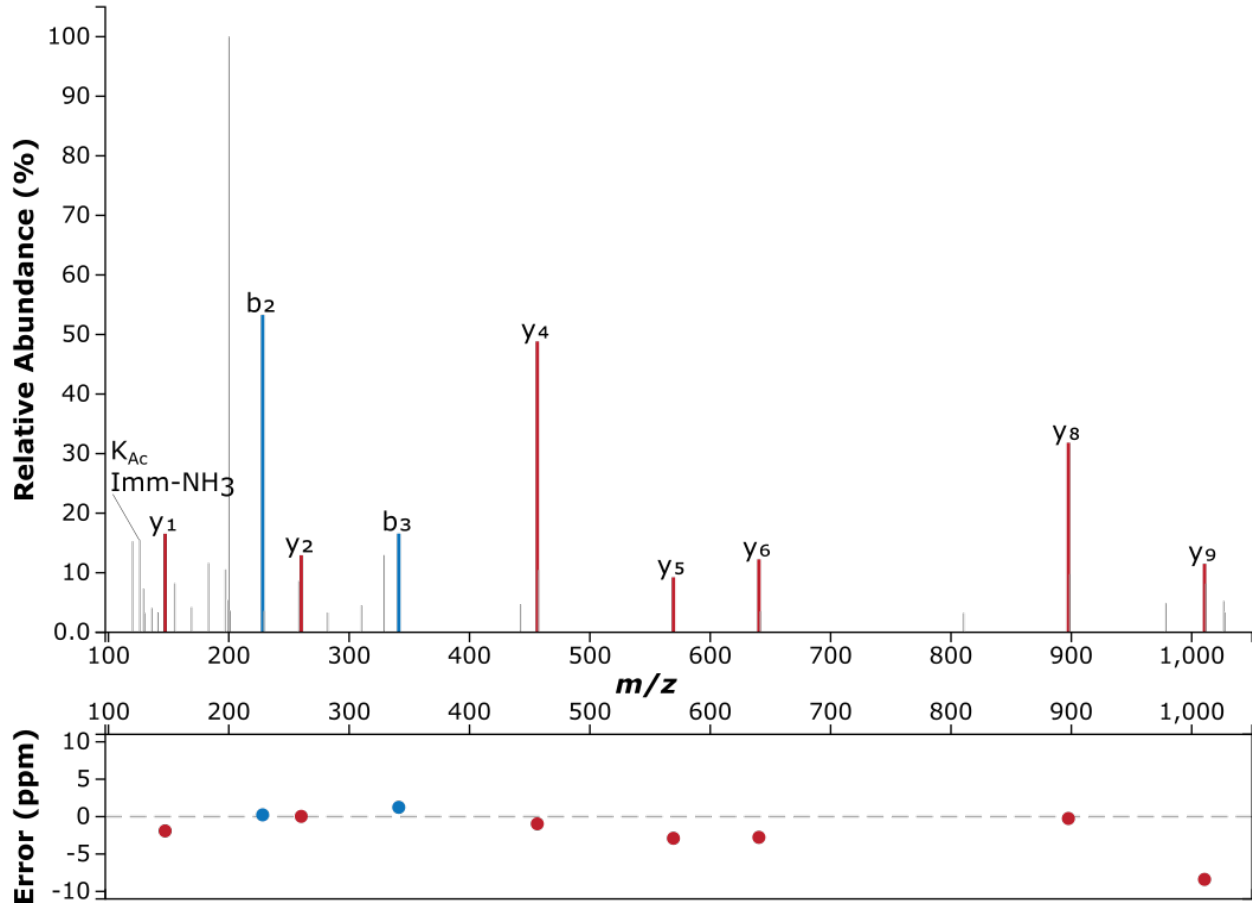



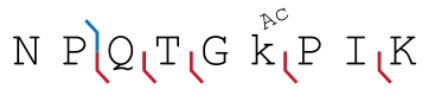

Precursor m/z: 512.7929      Charge: +2  
 DNA-binding protein HU (Q2LW81)

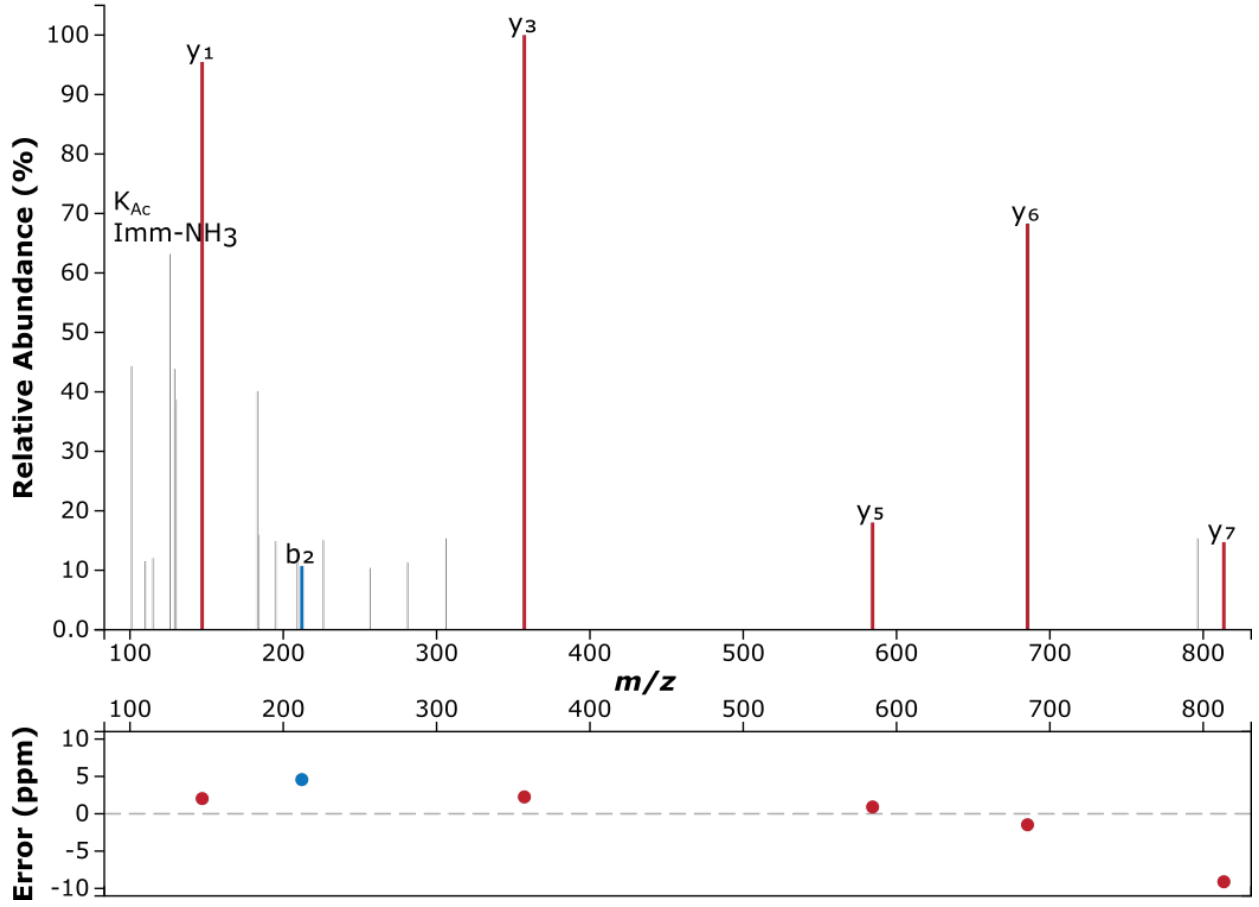

N P Q V Y T D T Y V <sup>Ac</sup> k D G E I V Y G E P K

Precursor m/z: 819.7322 Charge: +3

6-oxocyclohex-1-ene-1-carboxyl-CoA hydrolase (Q2LXU2)

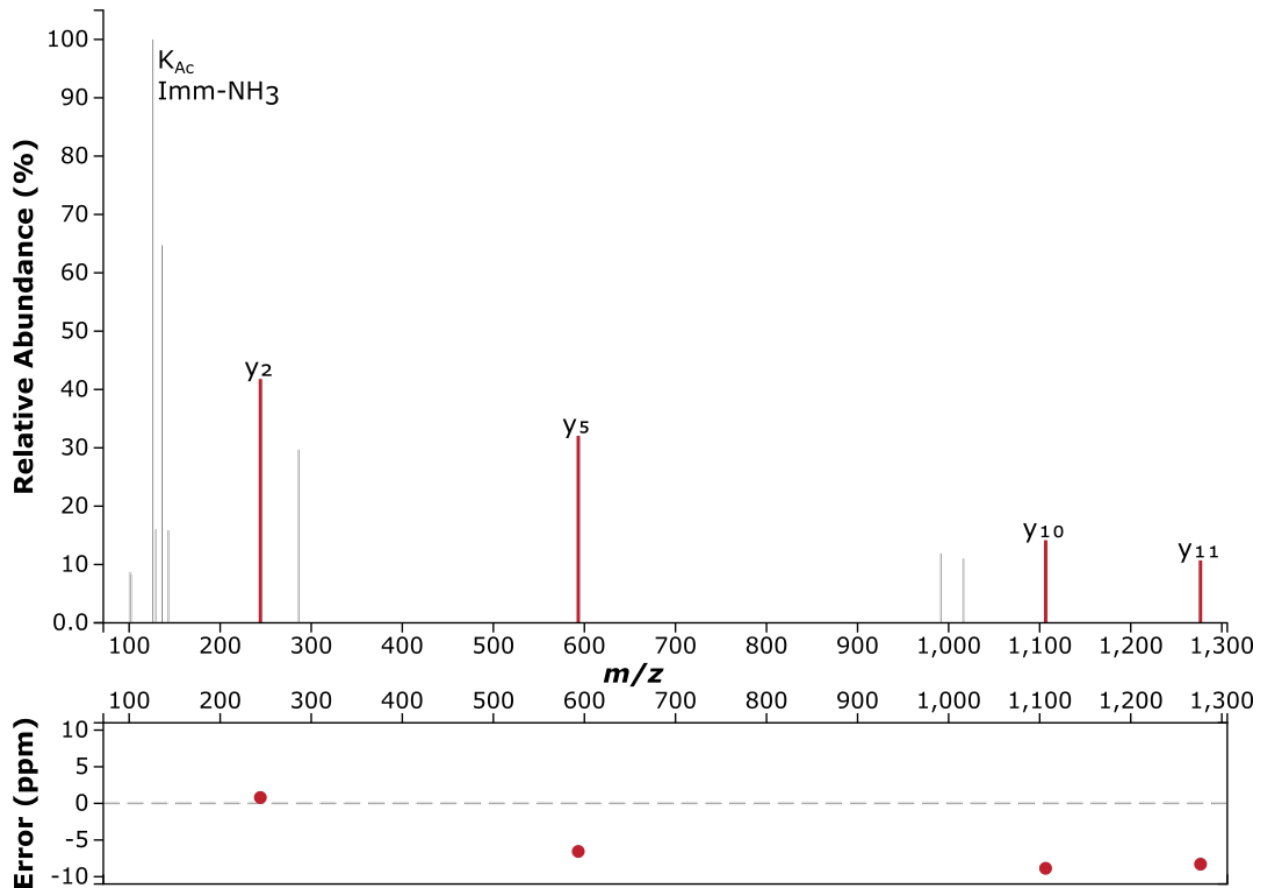

Q A D E I L T F Y <sup>Ac</sup> k K

Precursor m/z: 699.3692 Charge: +2

Acetyl-CoA synthetase (Q2LWR8)

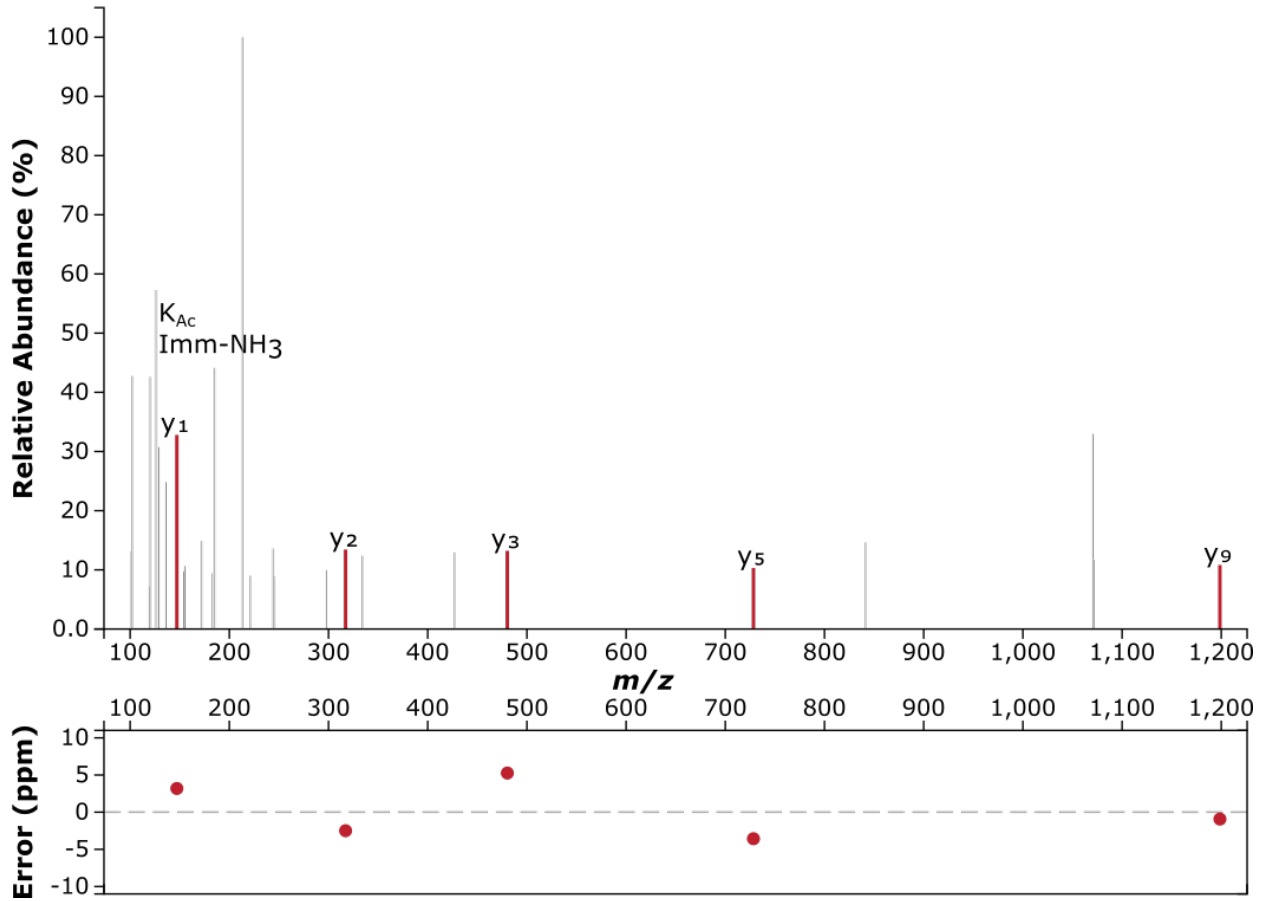

Q G F A P S P E L E <sup>Ac</sup> k E L K

Precursor m/z: 807.9223

Charge: +2

4-hydroxybenzoate-CoA ligase / benzoate-CoA ligase (Q2LRH7)

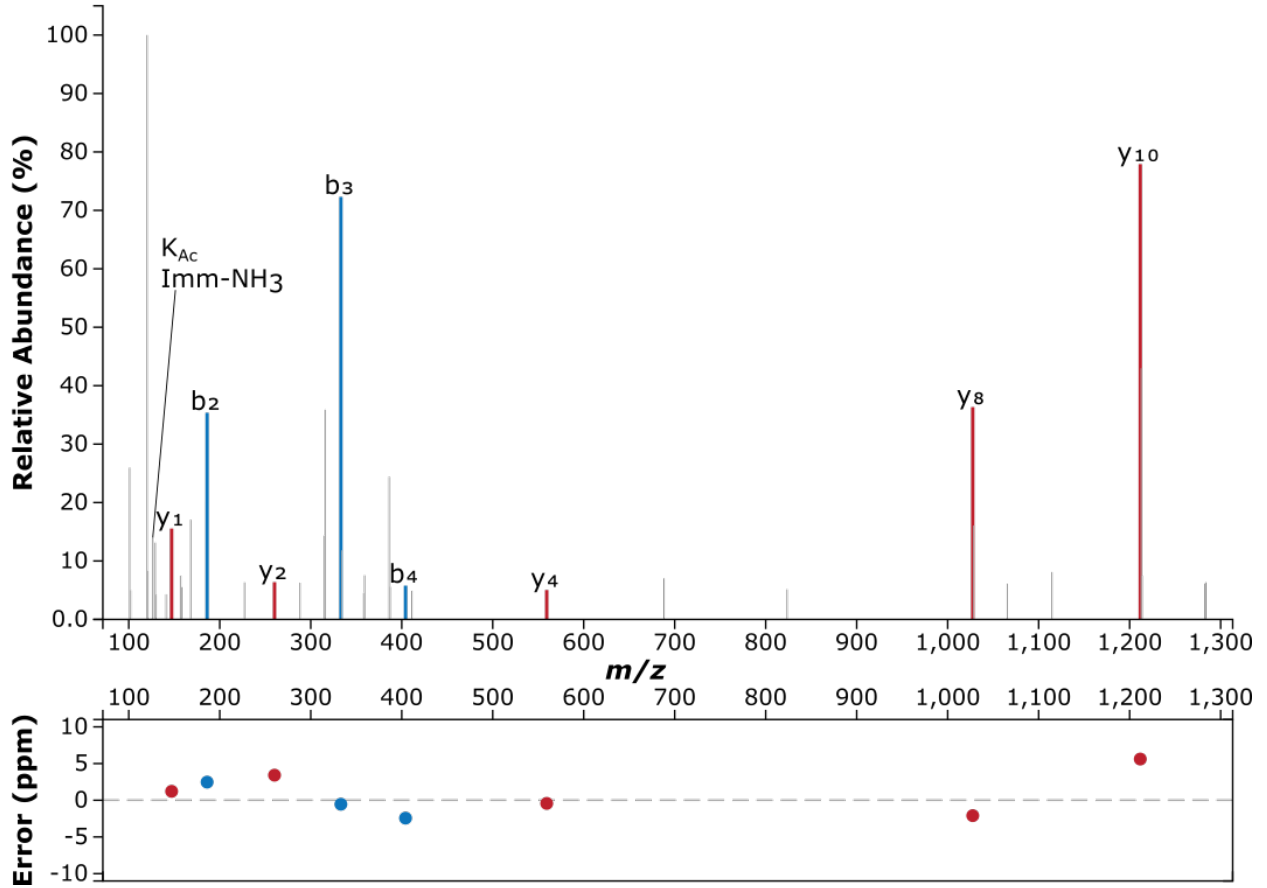

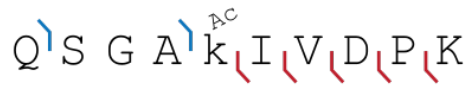

Precursor m/z: 542.8035

Charge: +2

DNA-directed RNA polymerase subunit beta (Q2LQ87)

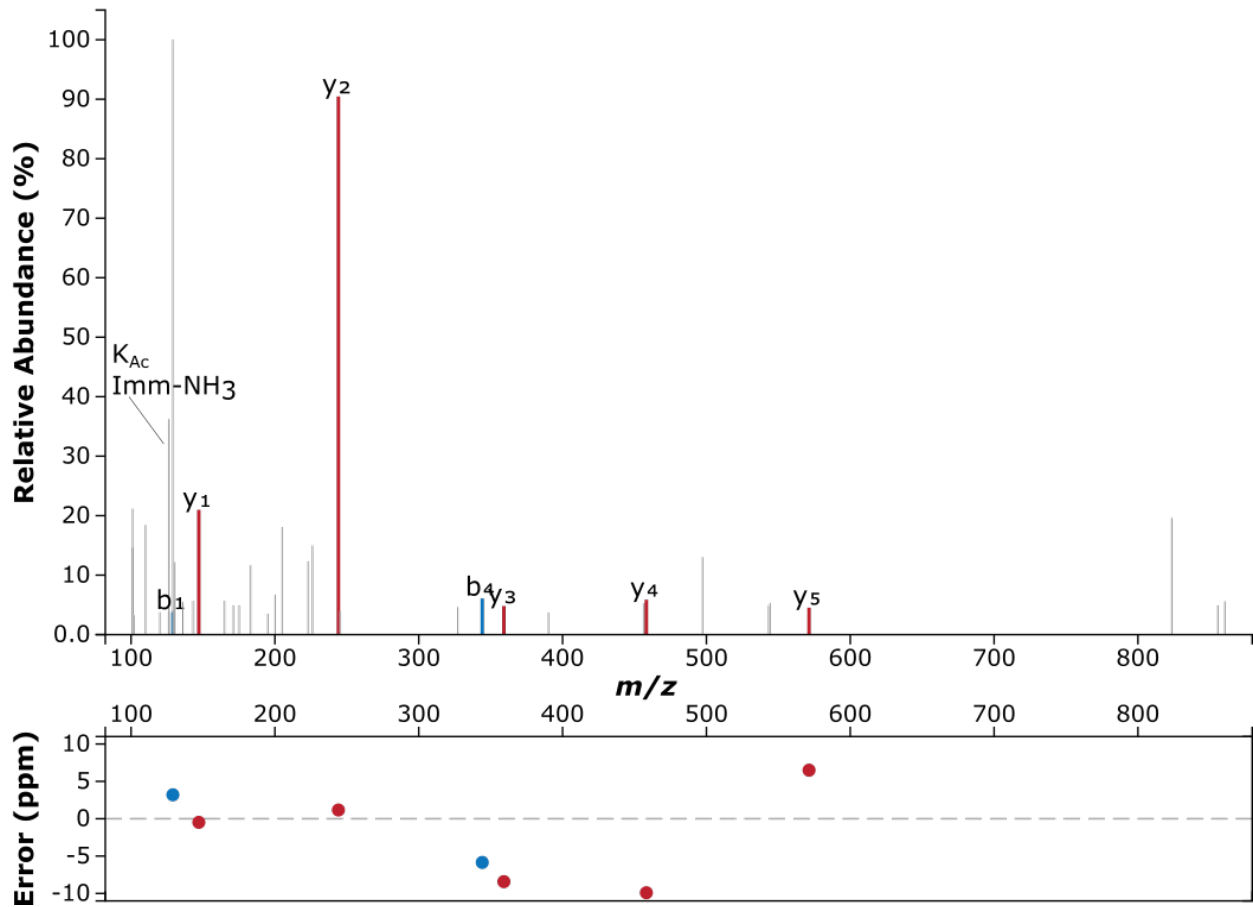

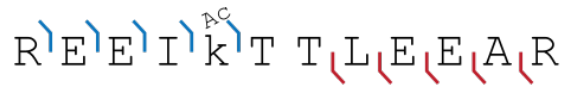

Precursor m/z: 506.2704 Charge: +3

ATP synthase subunit b 1 (Q2LQZ9)

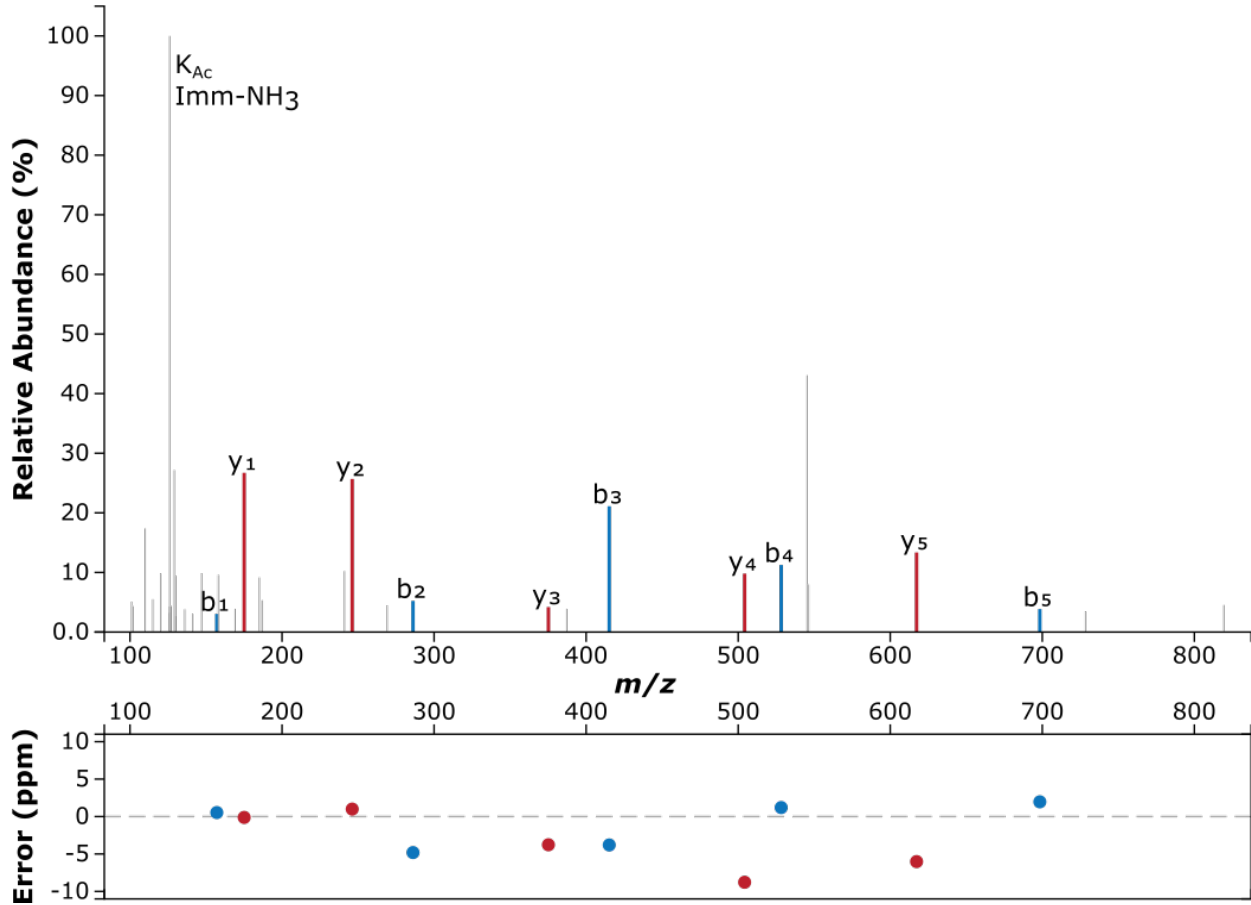

R P L K D P <sup>Ac</sup>k G N V V P G L Y S A W I R

Precursor m/z: 577.8286

Charge: +4

6-oxocyclohex-1-ene-1-carboxyl-CoA hydrolase (Q2LXU2)

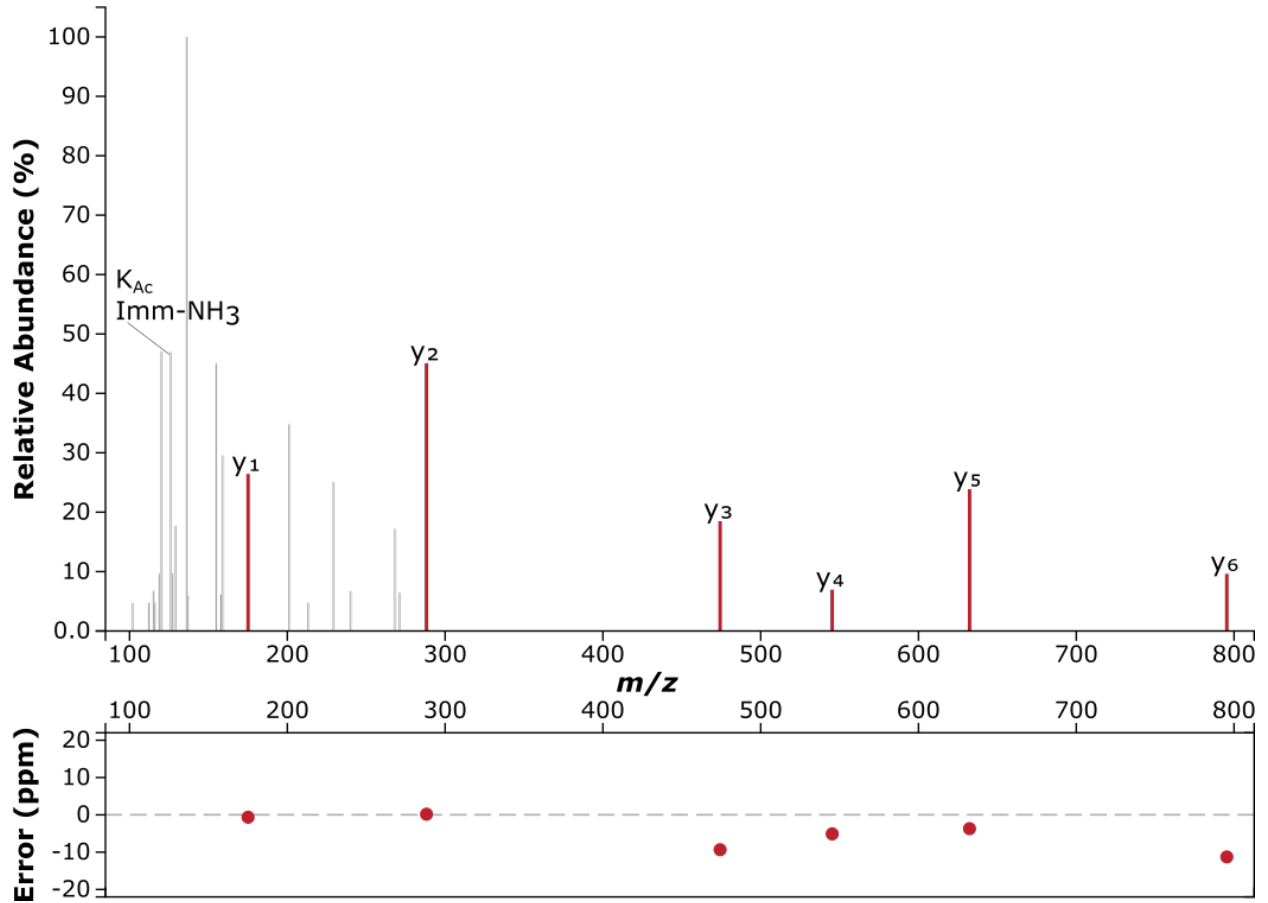

S I E D L D k K

Precursor m/z: 495.2611 Charge: +2  
Phosphoglycerate mutase (Q2LTT8)

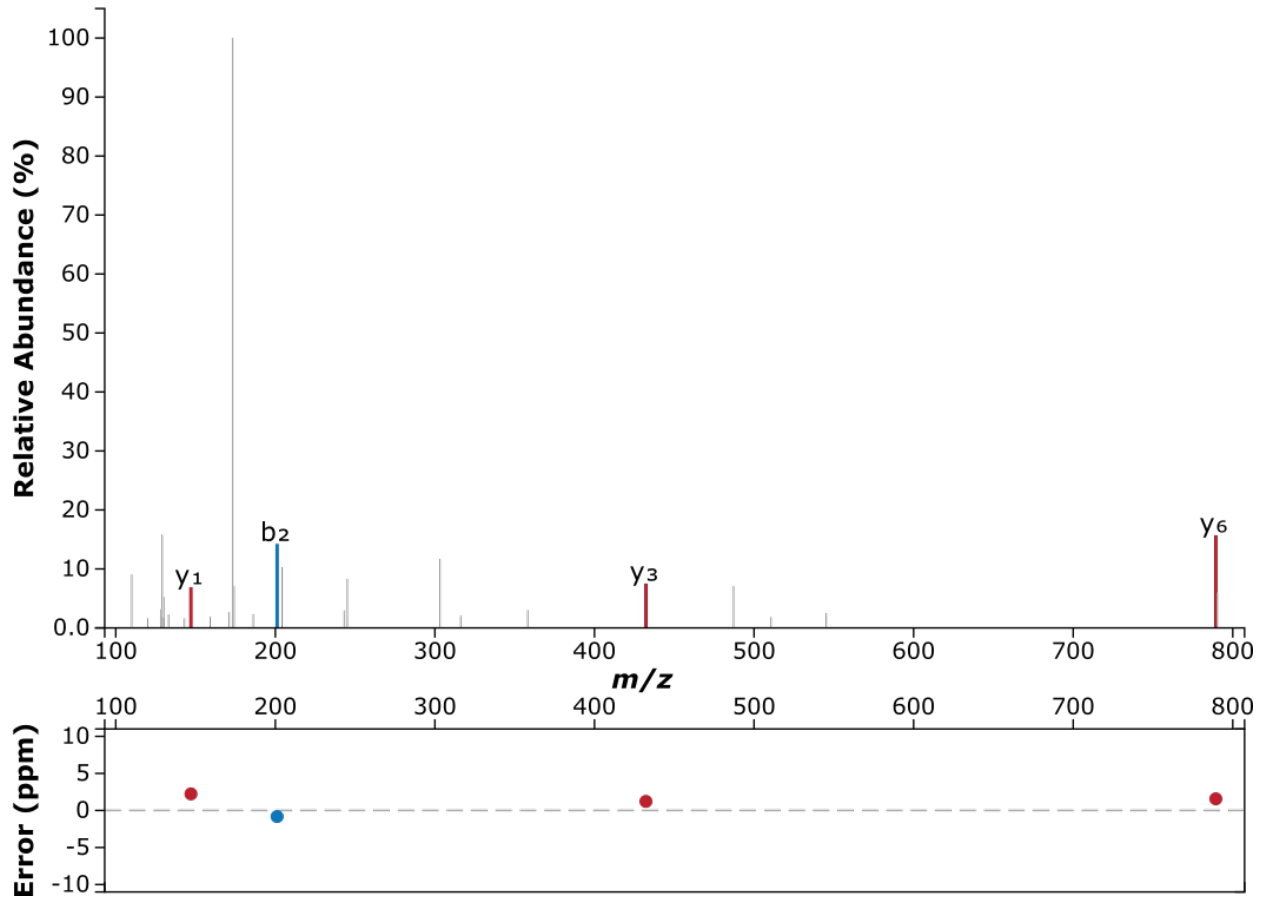



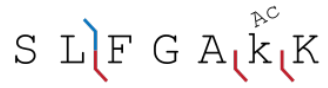

Precursor m/z: 396.7343

Charge: +2

K(+)-insensitive pyrophosphate-energized proton pump (Q2LUK4)

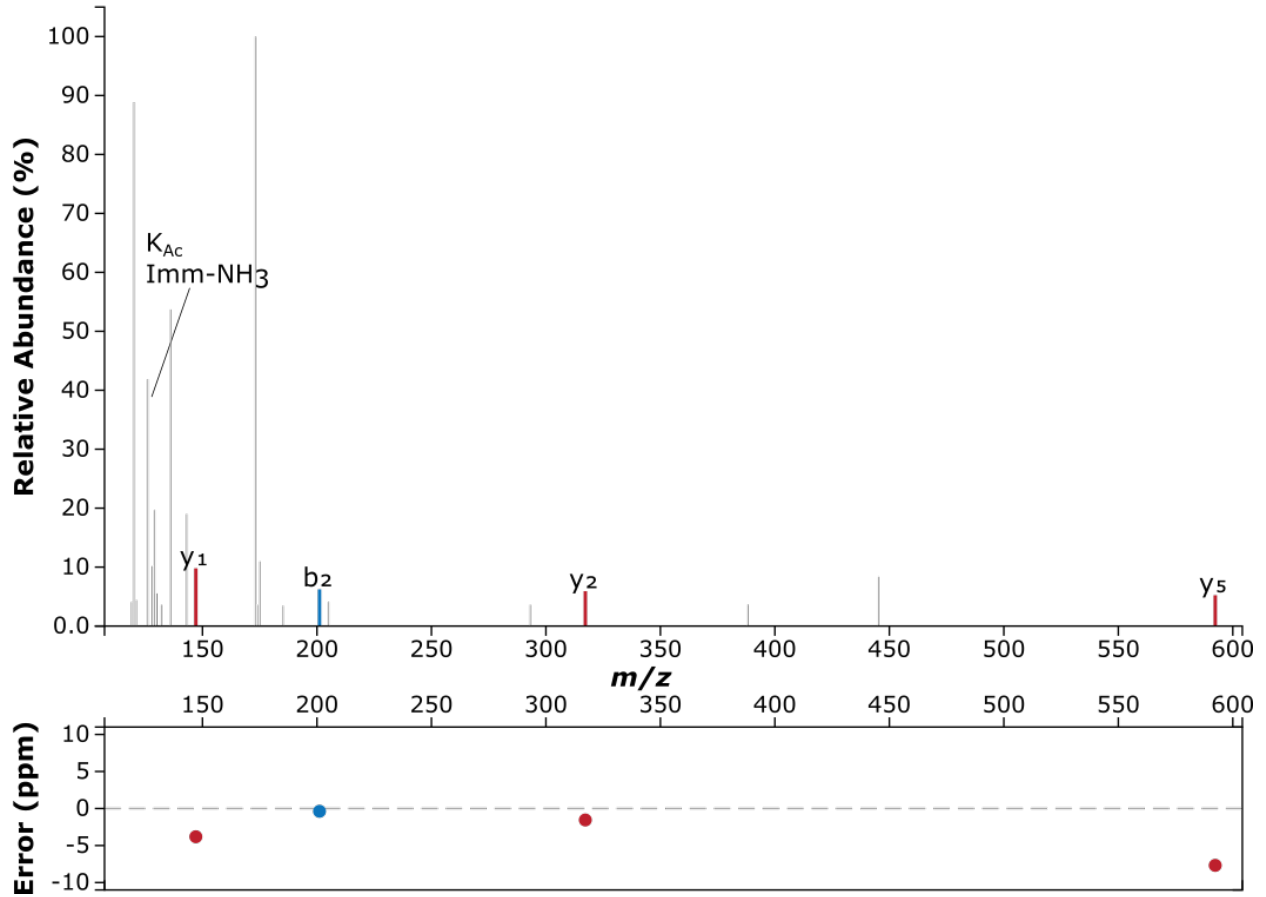

S N <sup>AC</sup> k D V M G E Y R

Precursor m/z: 620.7850

Charge: +2

6-hydroxycyclohex-1-ene-1-carboxyl-CoA dehydrogenase (Q2LXU3)

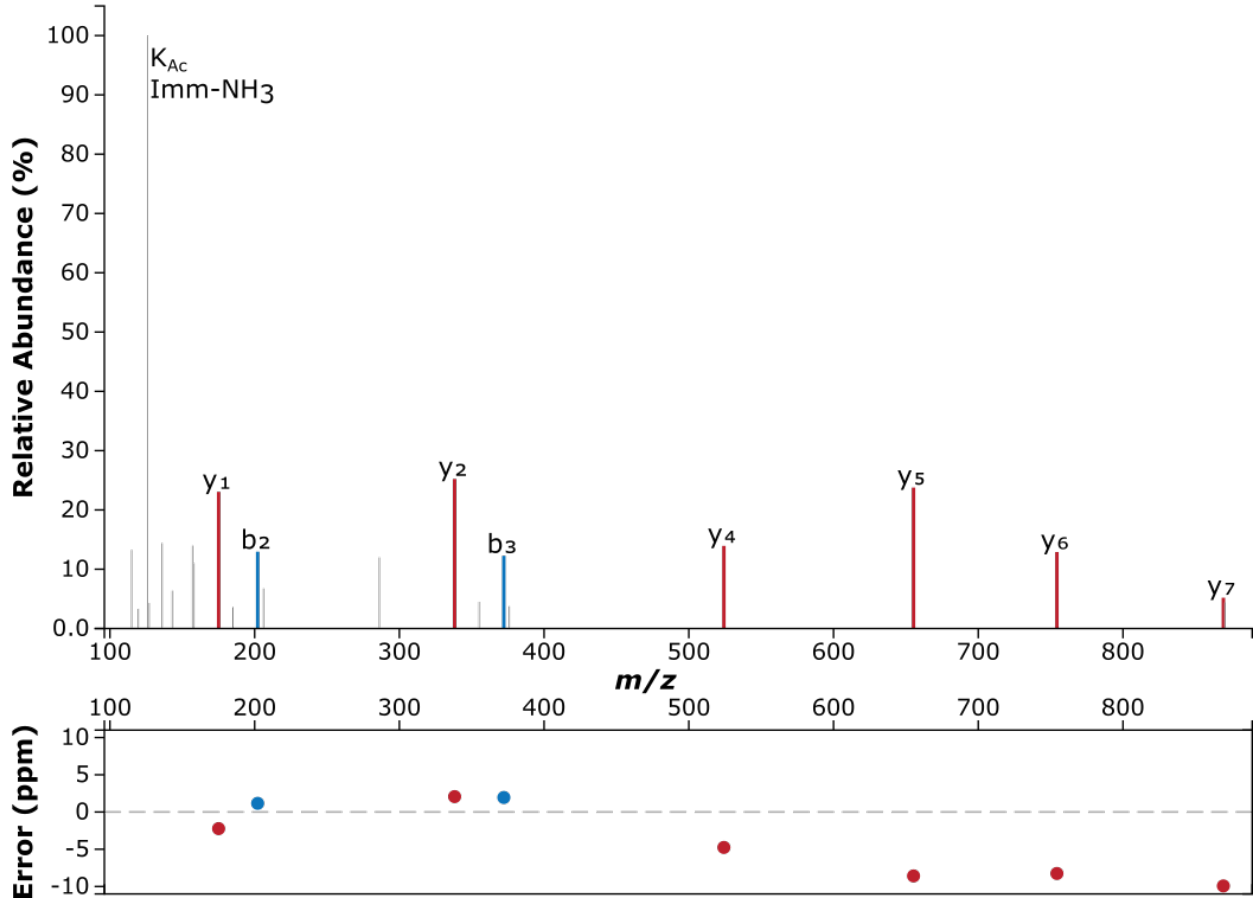

S S P T G E I Y L D N V <sup>Ac</sup>k V P K

Precursor m/z: 894.9725

Charge: +2

Acyl-CoA dehydrogenase, short-chain specific (Q2LUY8)

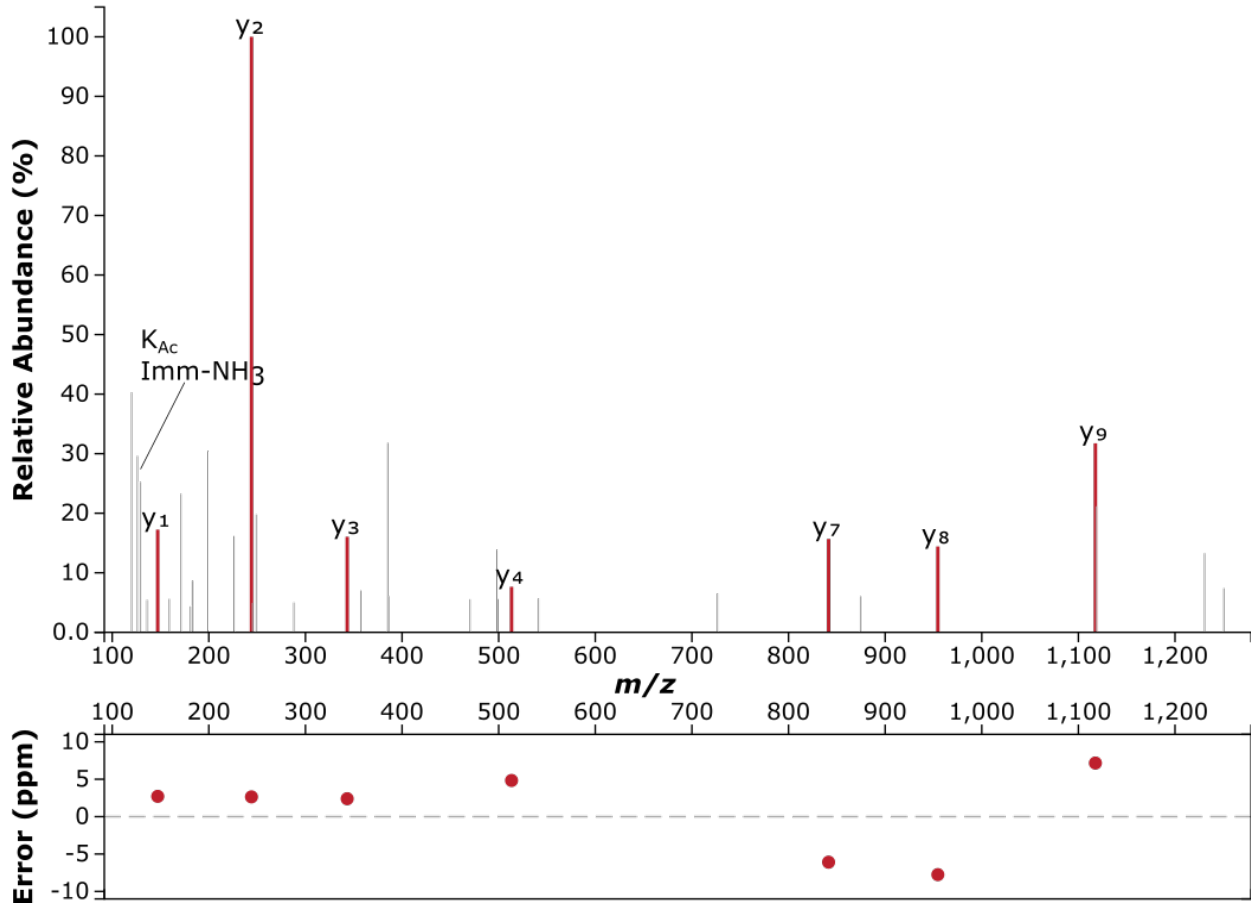

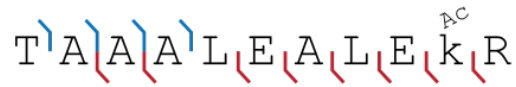

Precursor m/z: 607.8406

Charge: +2

Polyribonucleotide nucleotidyltransferase (Q2LWT4)

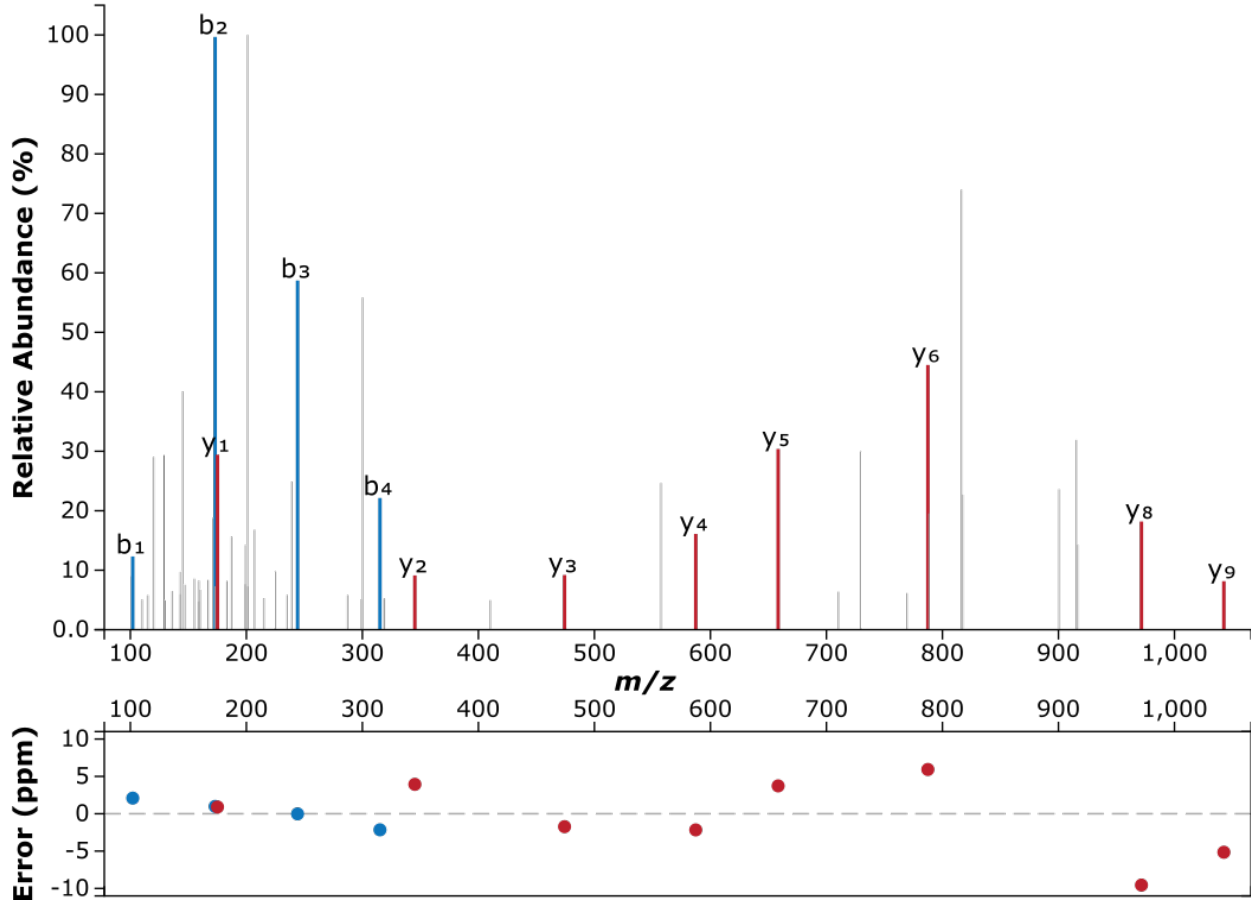

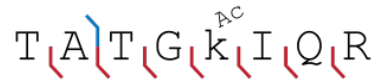

Precursor m/z: 458.7642

Charge: +2

4-hydroxybenzoate-CoA ligase / benzoate-CoA ligase (Q2LRH0, Q2LRH7)

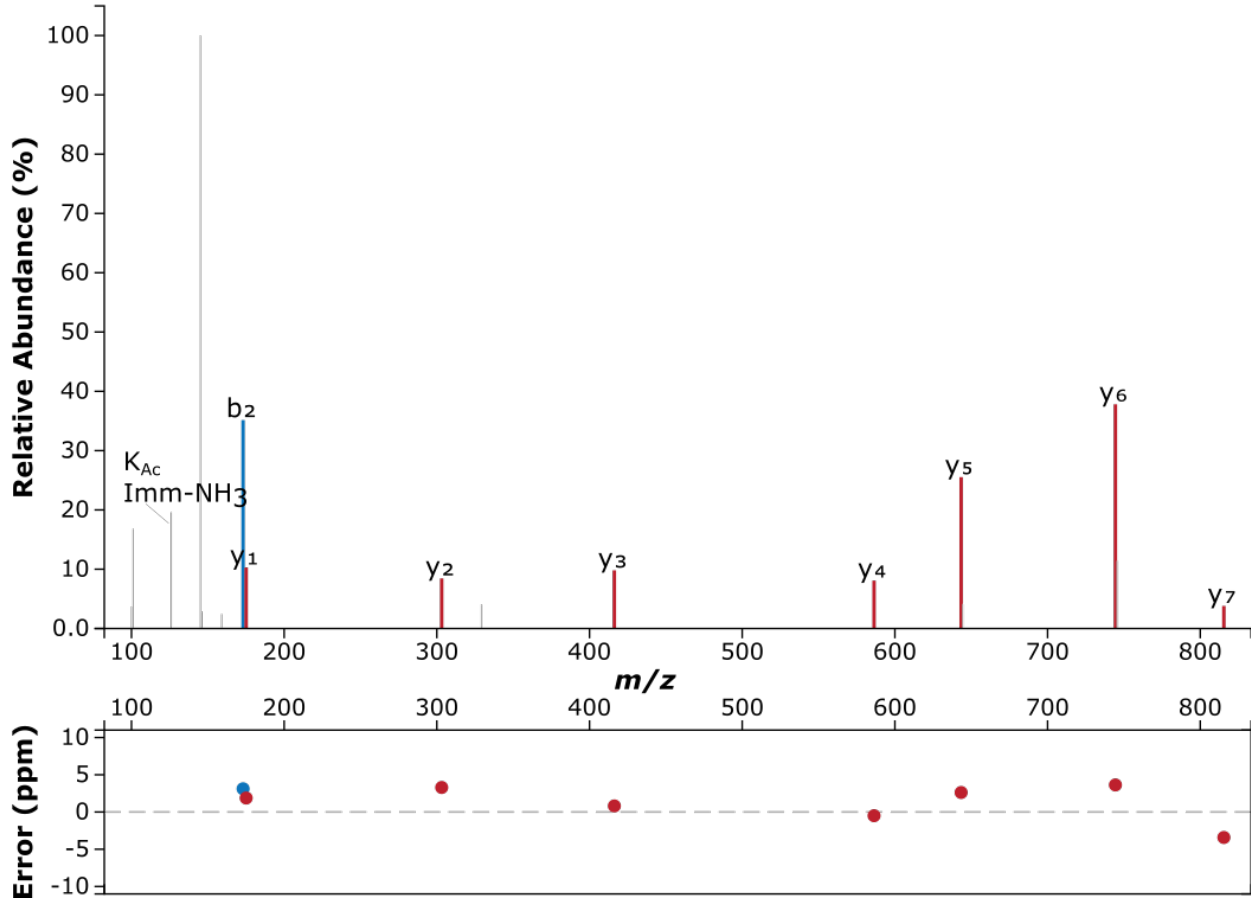

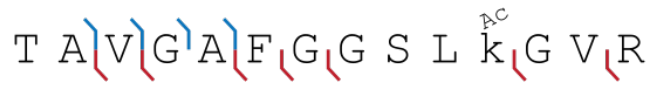

Precursor m/z: 681.3804 Charge: +2

Acetyl-CoA acetyltransferase (Q2LWQ5)

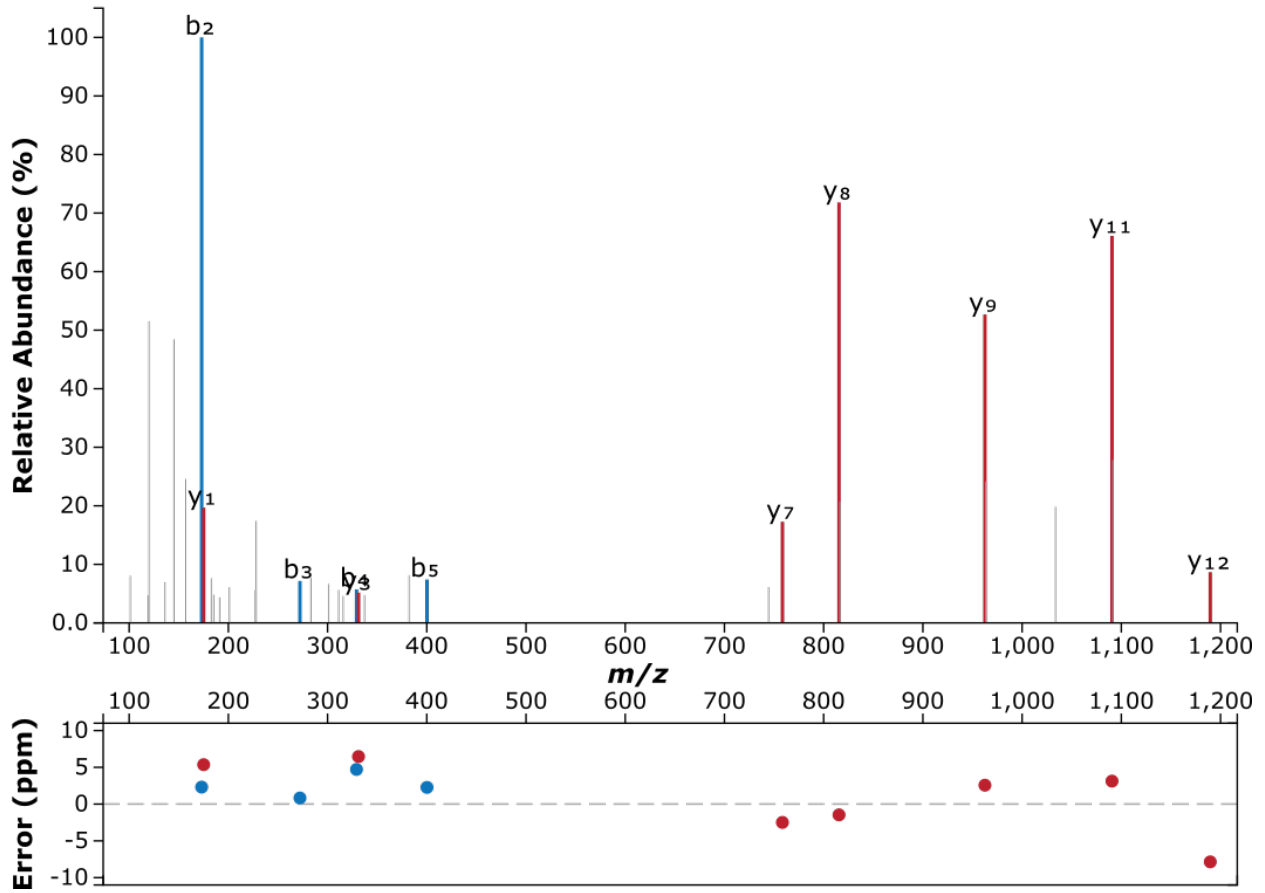

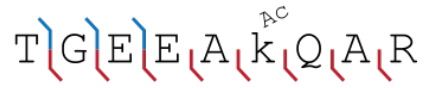

Precursor m/z: 516.2594

Charge: +2

6-oxocyclohex-1-ene-1-carboxyl-CoA hydrolase (Q2LXU2)

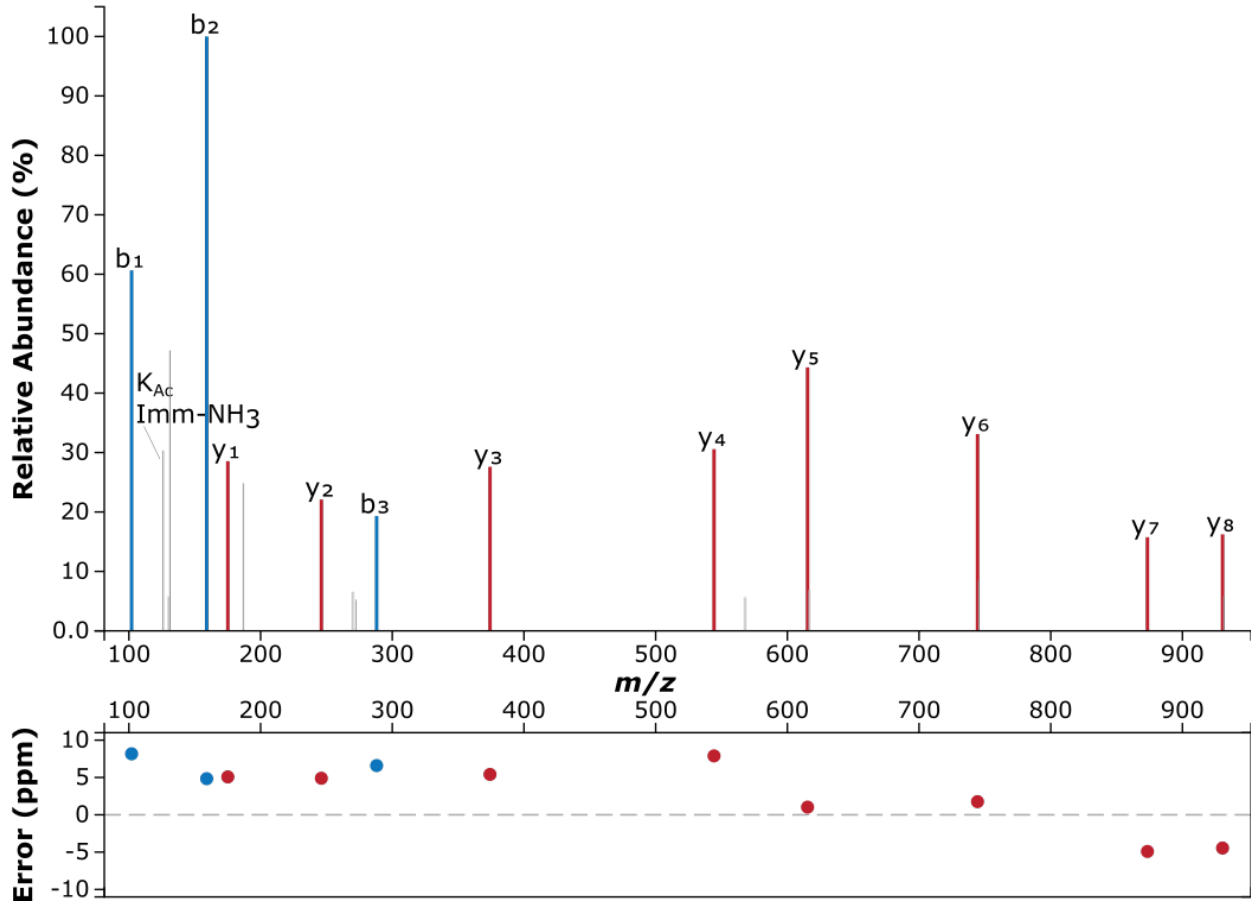

T G k<sup>AC</sup> I A Q I P V G E A L L G R

Precursor m/z: 832.9883 Charge: +2

ATP synthase subunit alpha 1 (Q2LQZ7)

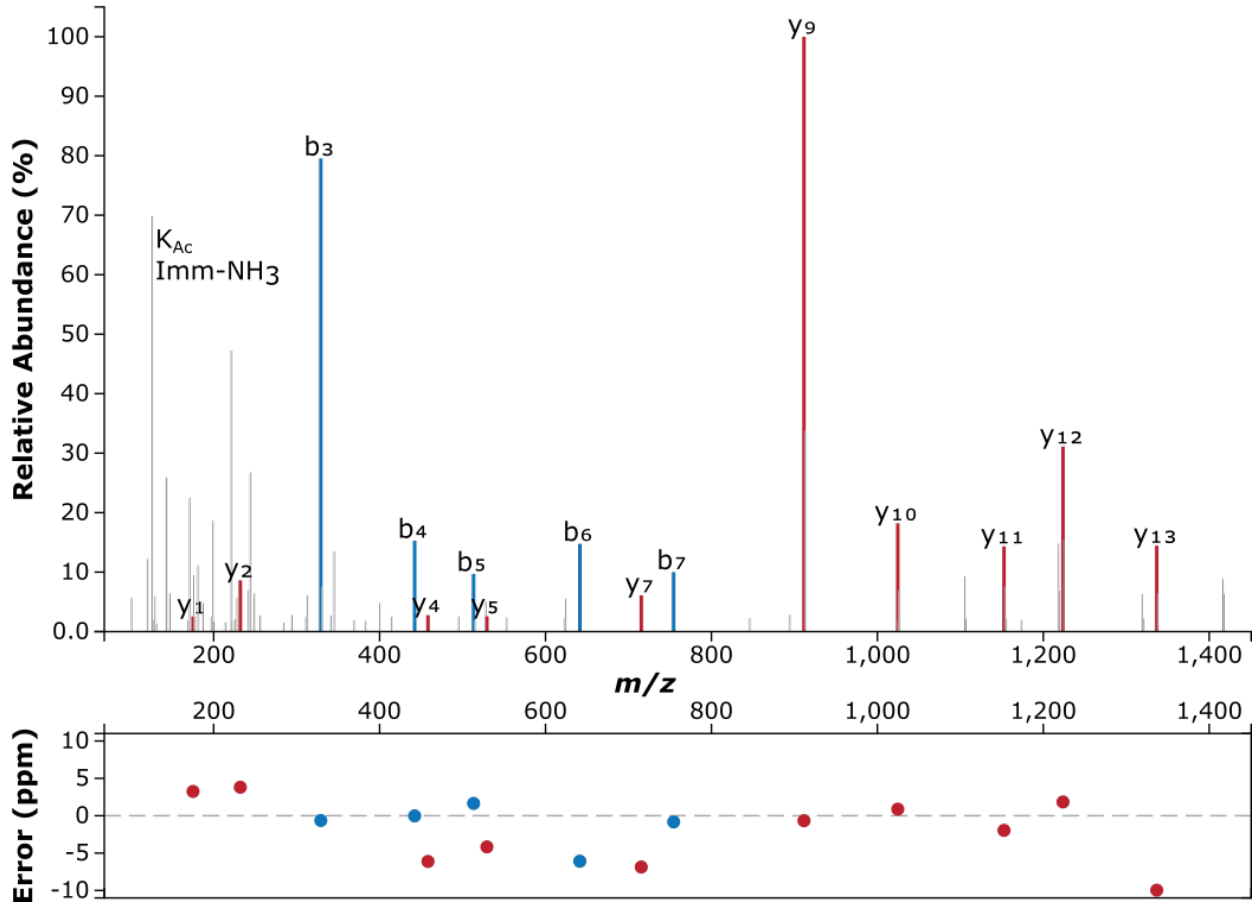



T I Y G D H k R

Precursor m/z: 344.5138

Charge: +3

Acetyl-CoA synthetase (Q2LWR8)

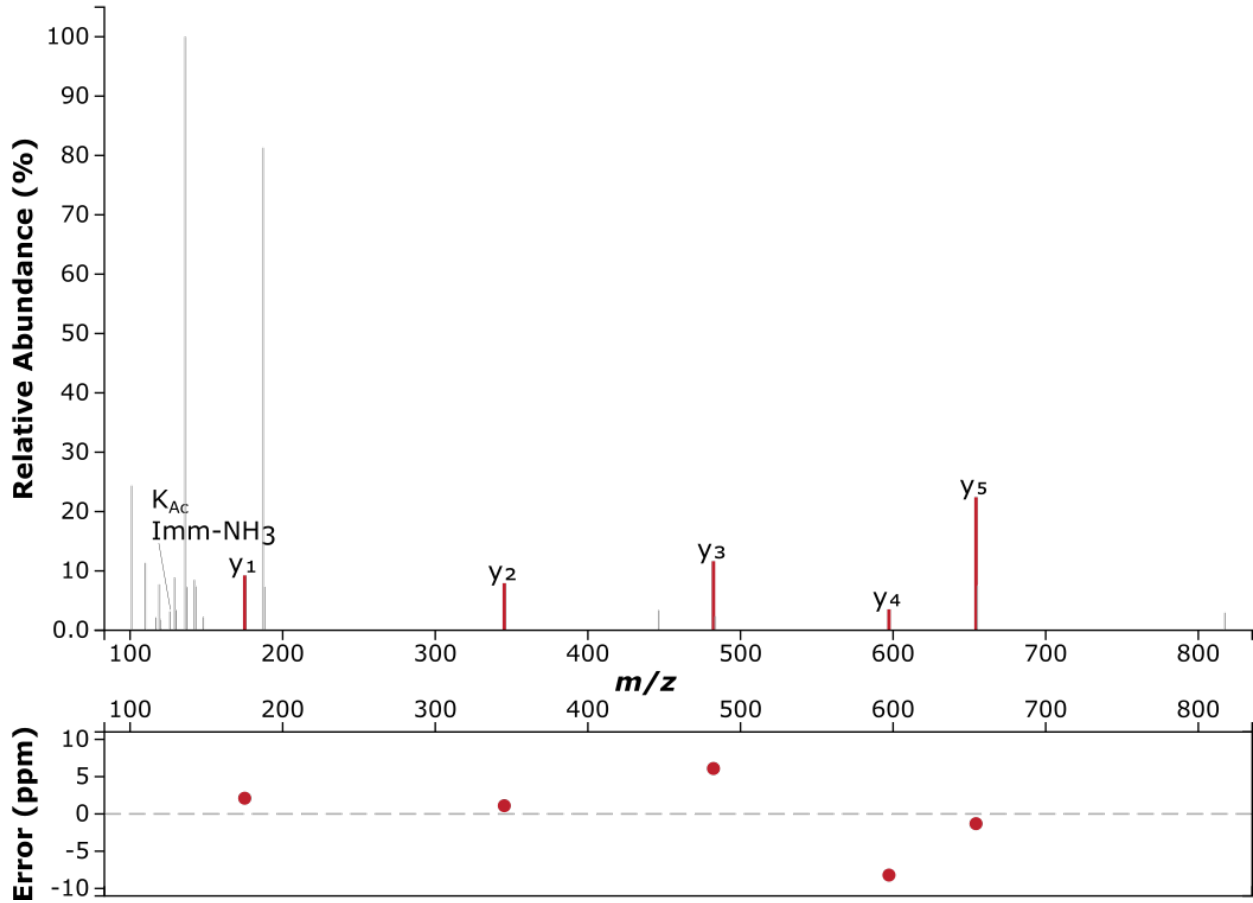

V A I Q W E G N E P G E Q <sup>Ac</sup> k A Y T Y K

Precursor m/z: 751.6989 Charge: +3

Acetyl-CoA synthetase (Q2LWR8)

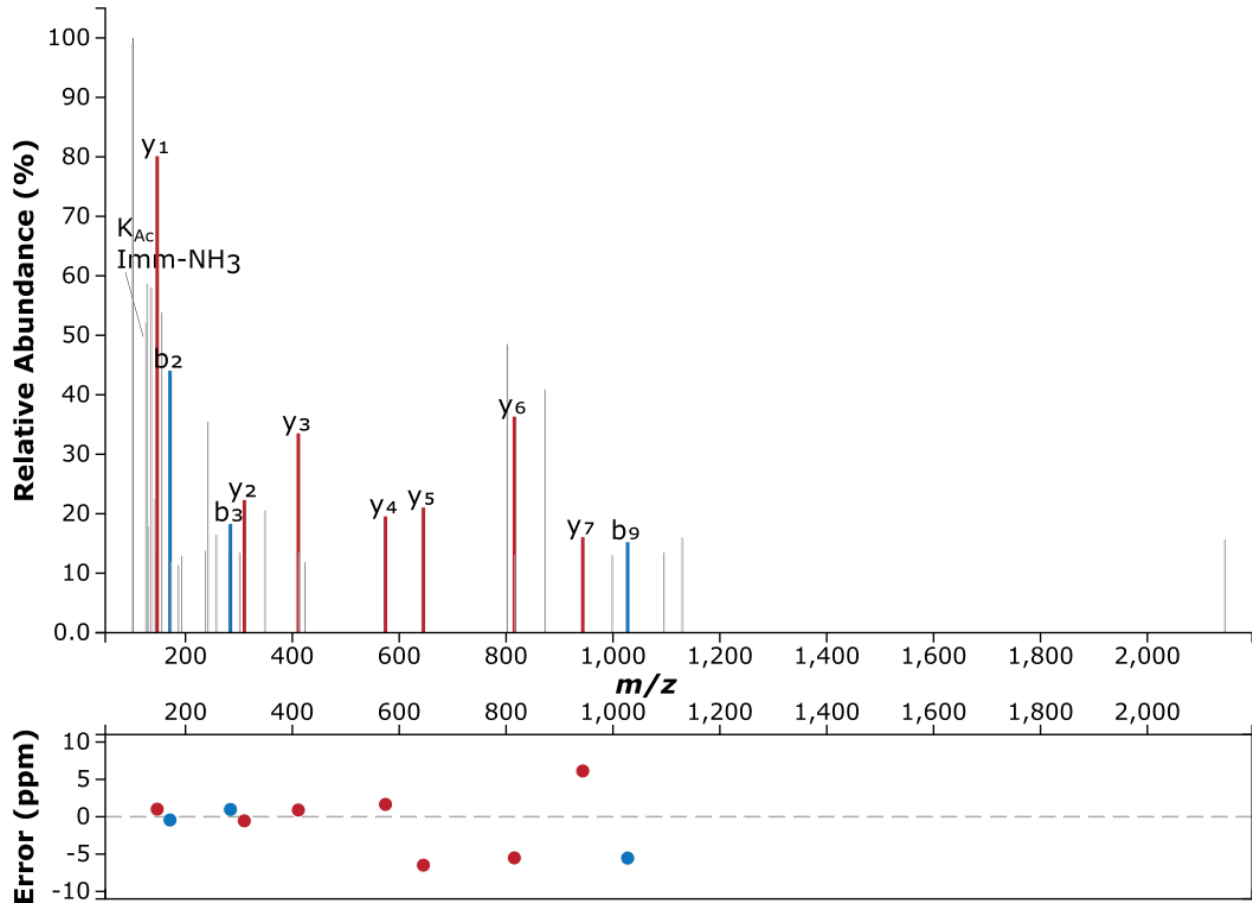

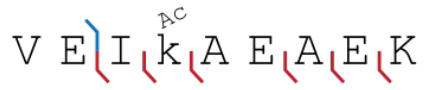

Precursor m/z: 529.7900

Charge: +2

3-oxoacyl-reductase (Q2LXS6)

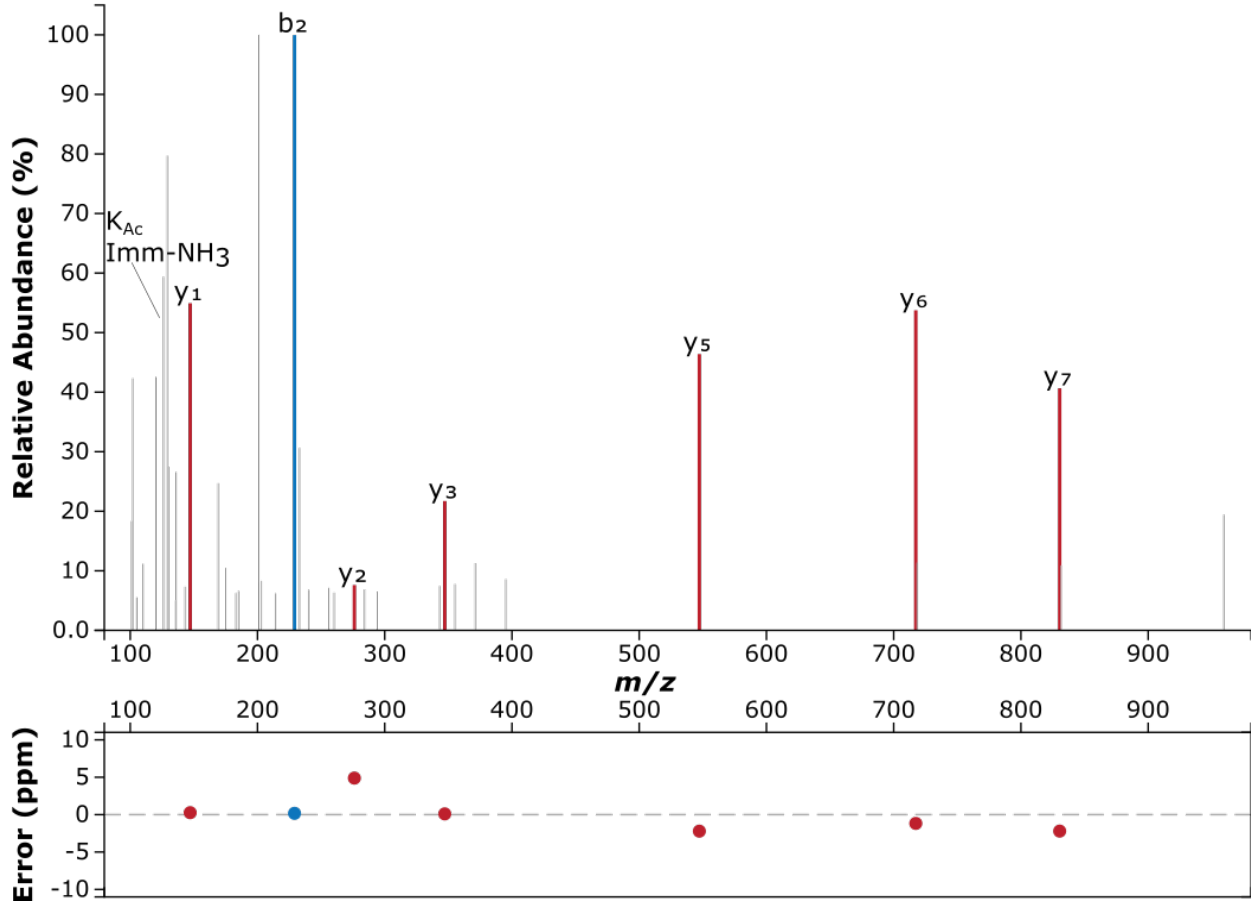

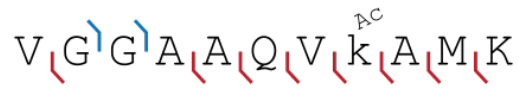

Precursor m/z: 551.3079 Charge: +2

ATP synthase subunit alpha 1 (Q2LQZ7)

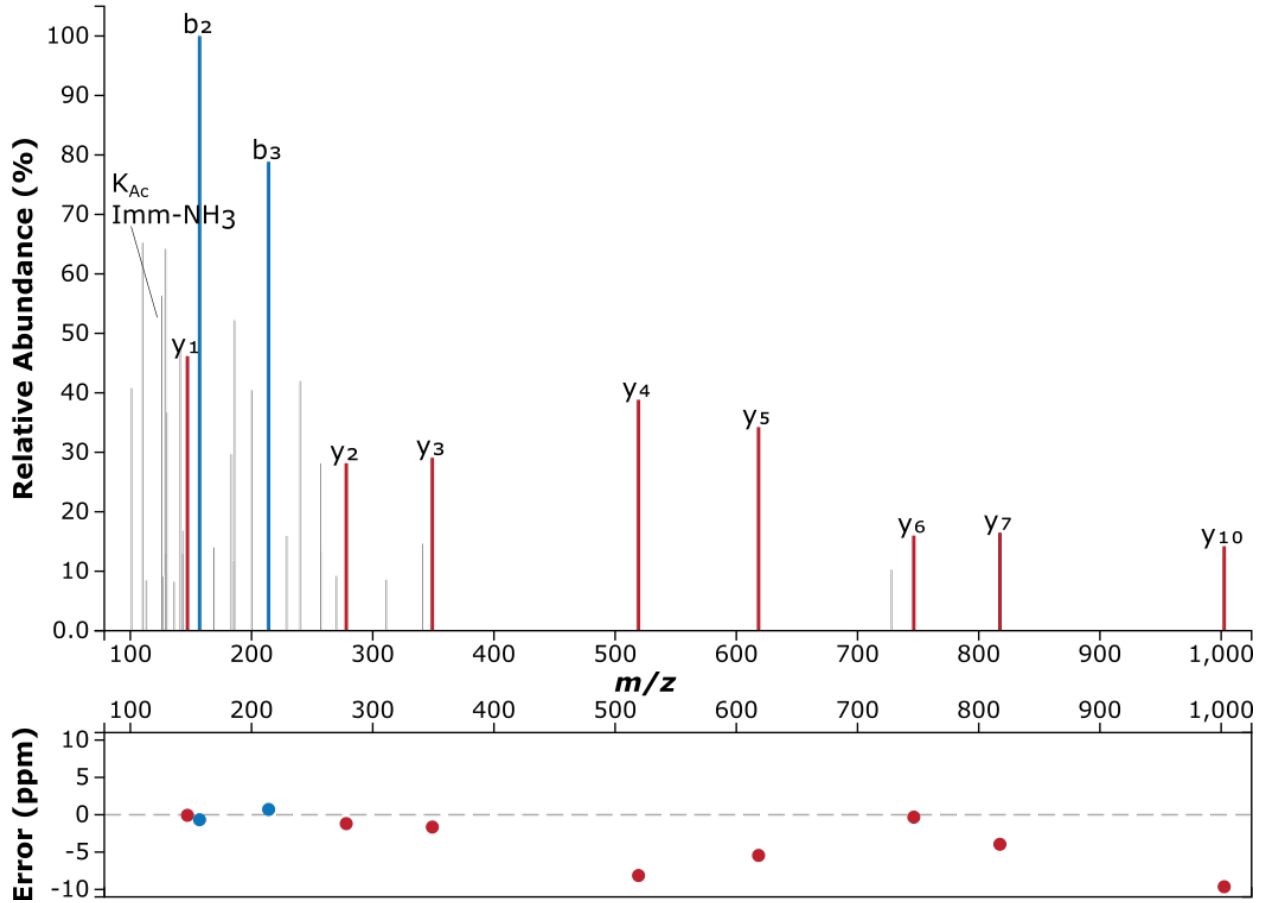

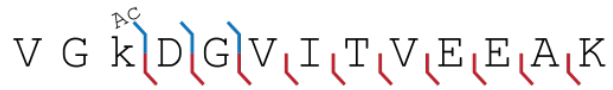

Precursor m/z: 693.8774 Charge: +2

60 kDa chaperonin 3 (Q2LU42)

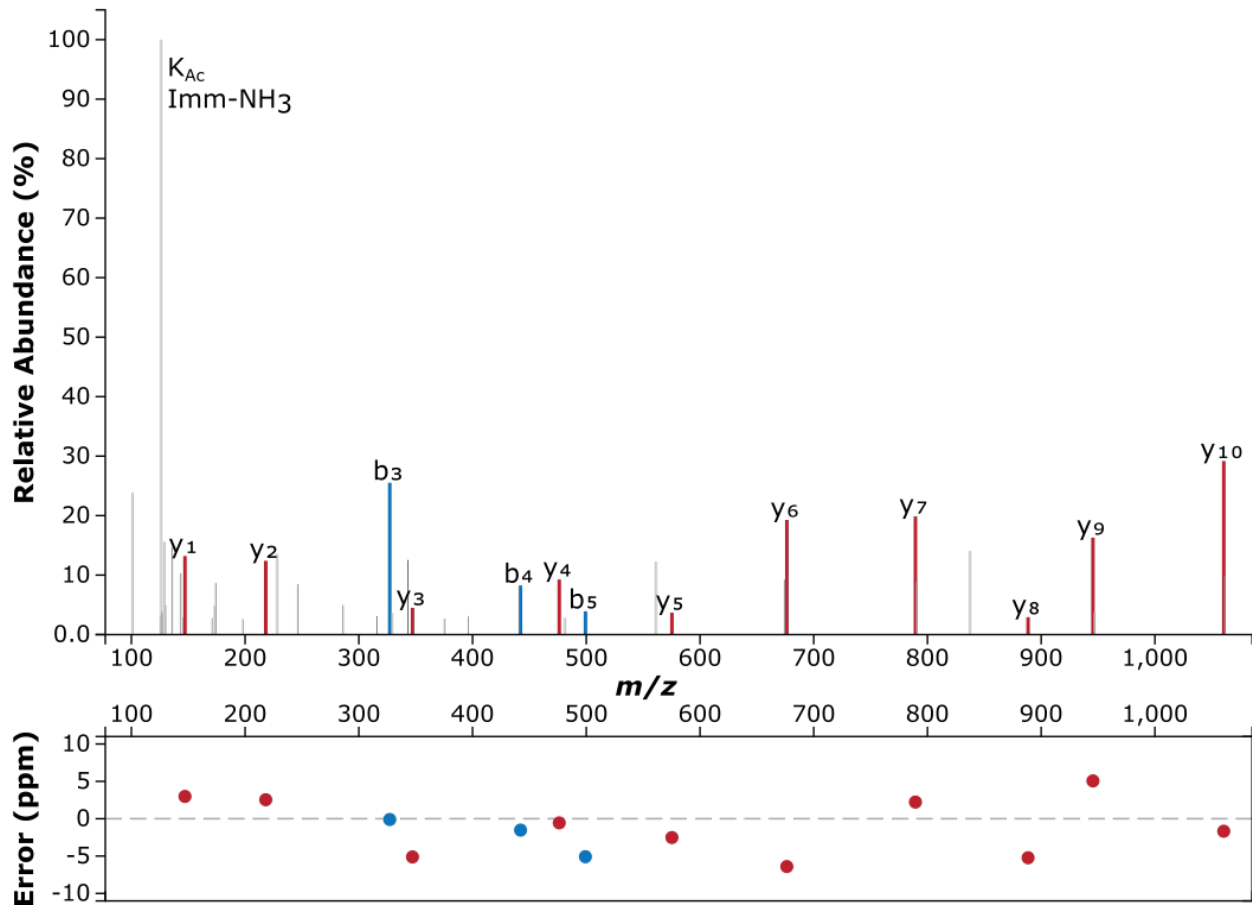

V I S P E L E Q k I K

Precursor m/z: 663.3874 Charge: +2

ATP synthase subunit alpha 1 (Q2LQZ7)

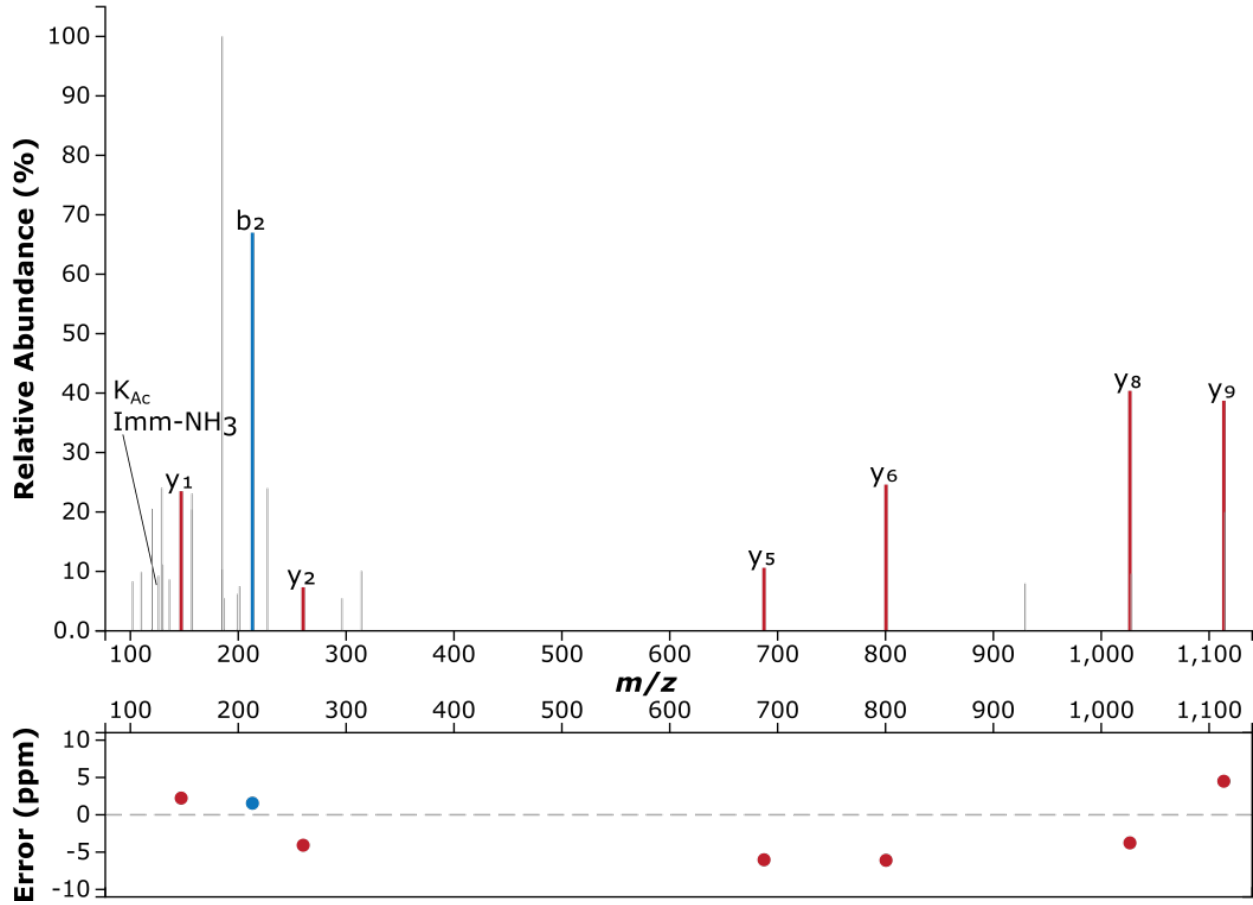

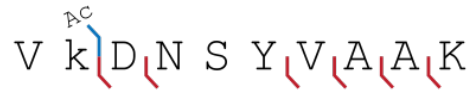

Precursor m/z: 568.8009 Charge: +2

Hypothetical exported protein (Q2LWR5)

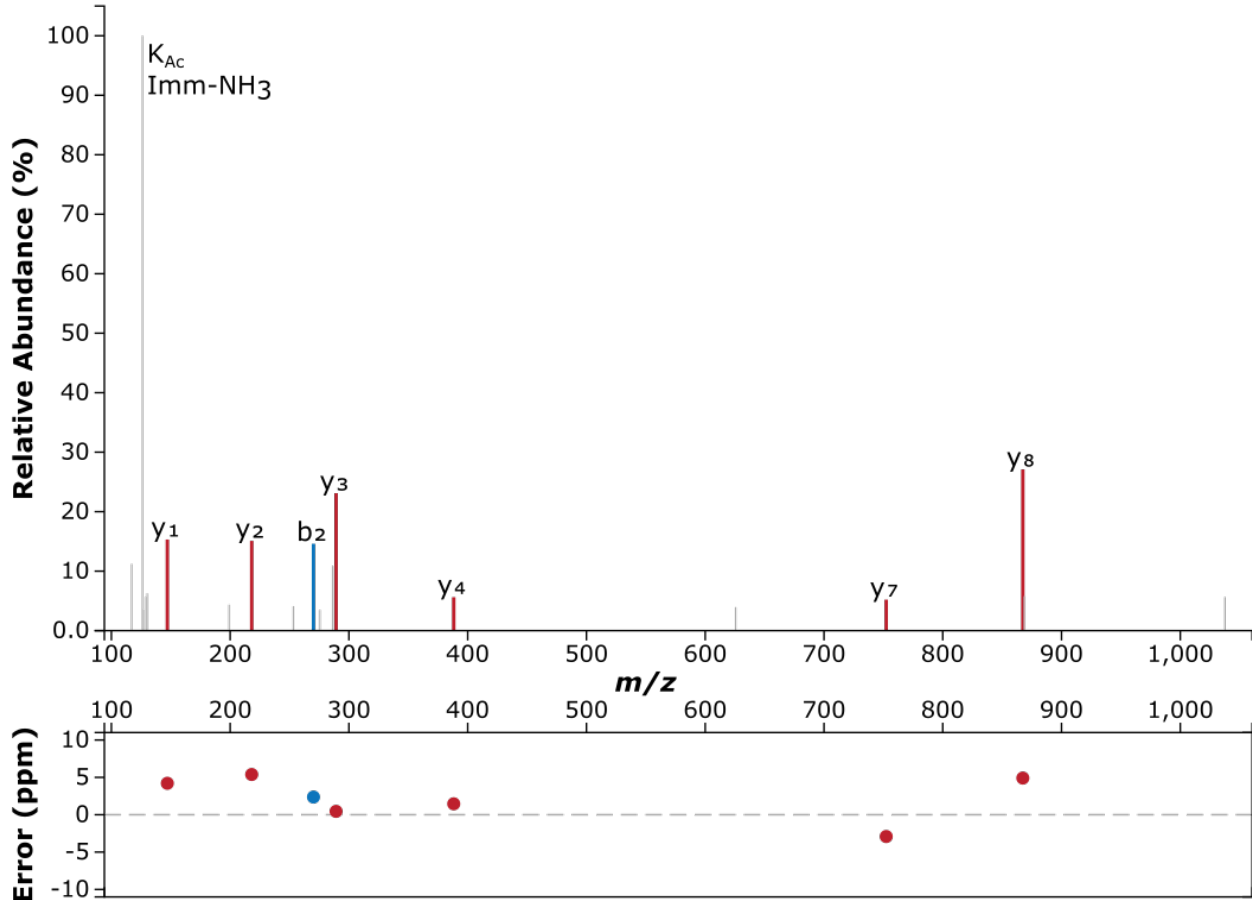

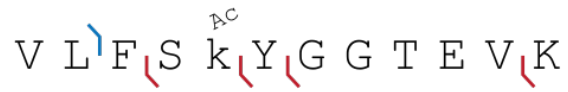

Precursor m/z: 685.3717  
 10 kDa chaperonin (Q2LTG3)

Charge: +2

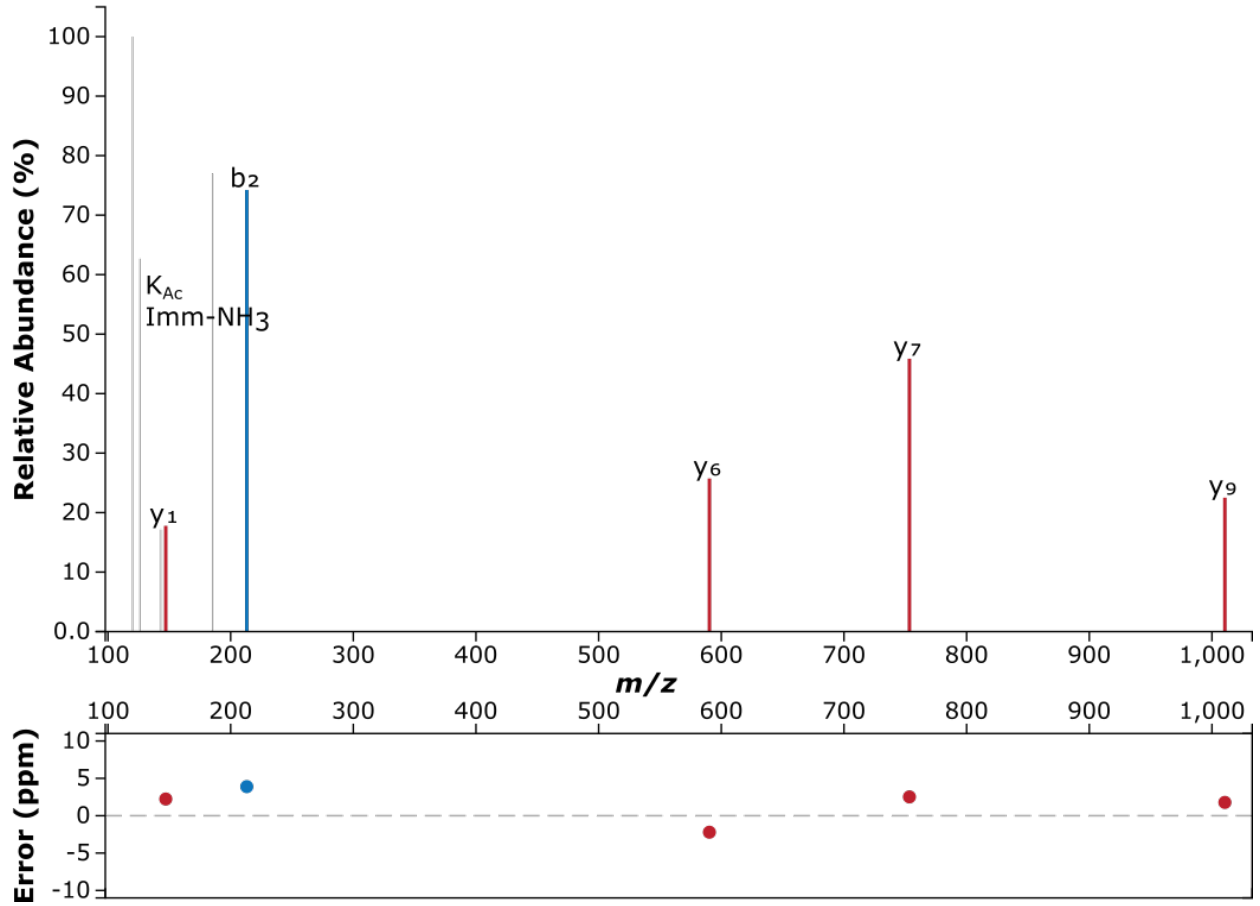



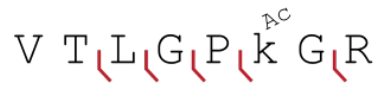

Precursor m/z: 435.2638 Charge: +2  
60 kDa chaperonin 3/2 (Q2LU42,Q2LTG7)

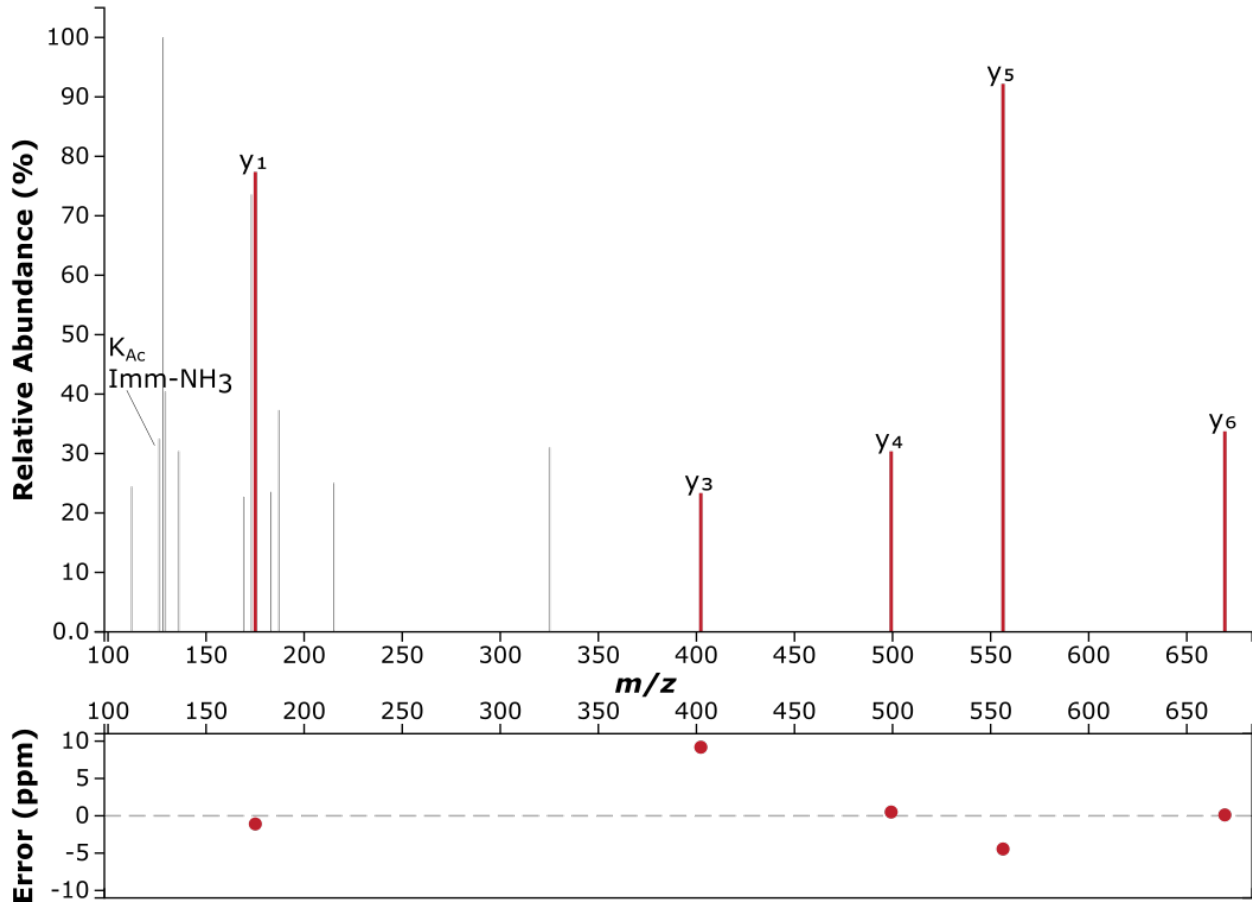

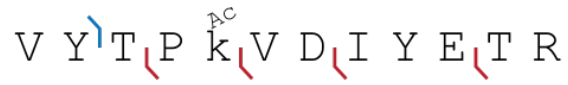

Precursor m/z: 763.3985

Charge: +2

Molecular chaperone (Q2LPJ5)

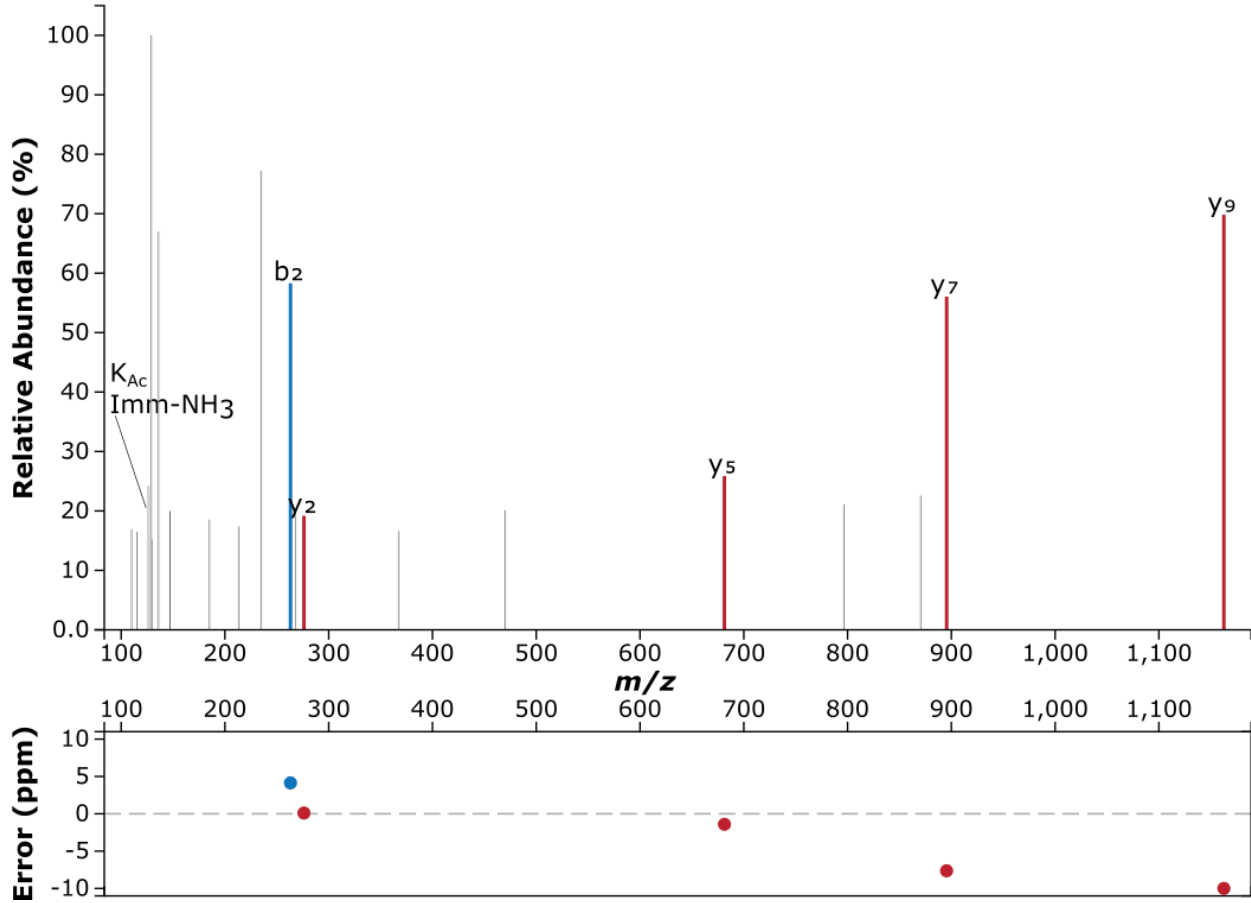

Y A E D A <sup>Ac</sup> k V I A R

Precursor m/z: 589.3142 Charge: +2

Adenylosuccinate synthetase (Q2LSI8)

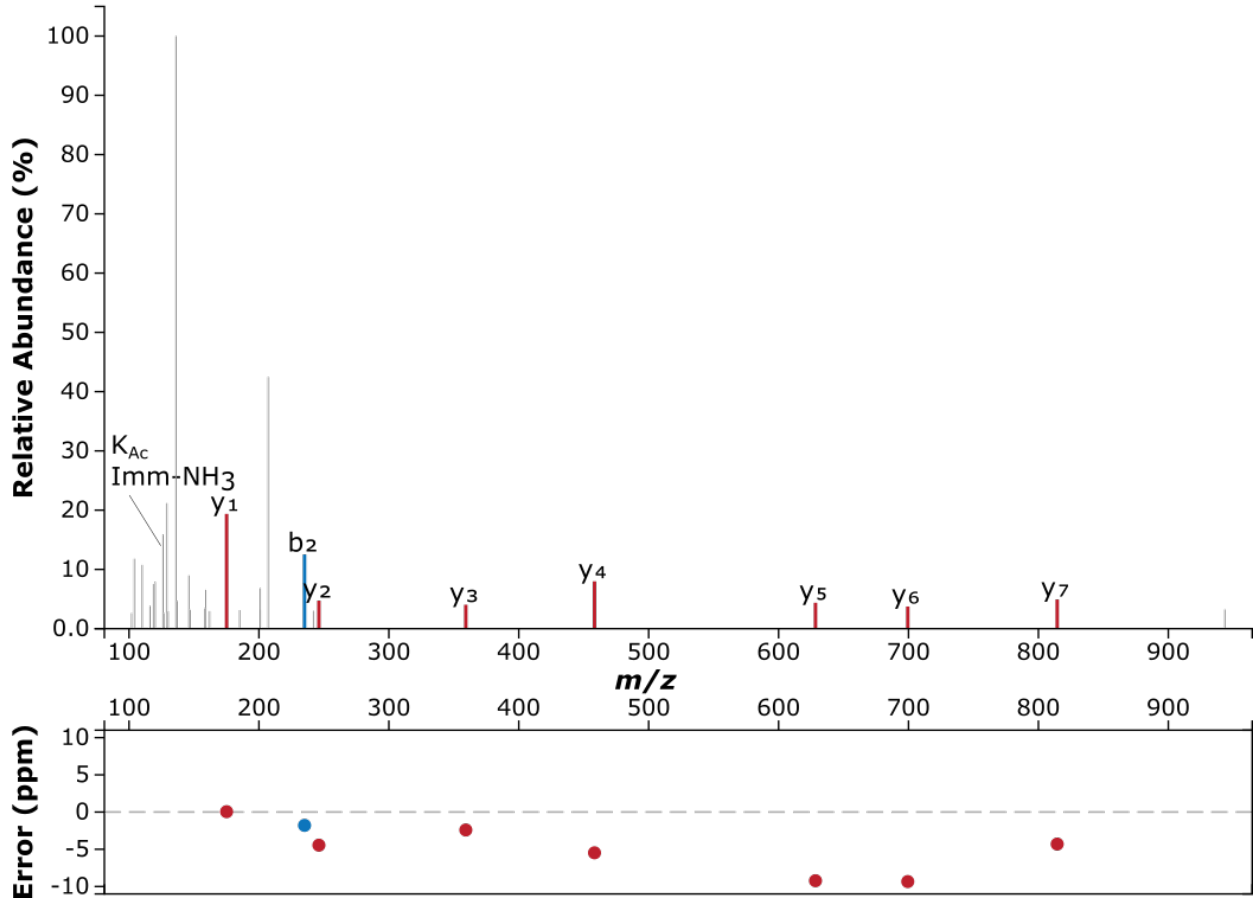

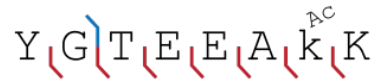

Precursor m/z: 484.2402

Charge: +2

Acyl-CoA dehydrogenase, short-chain specific (Q2LUY8)

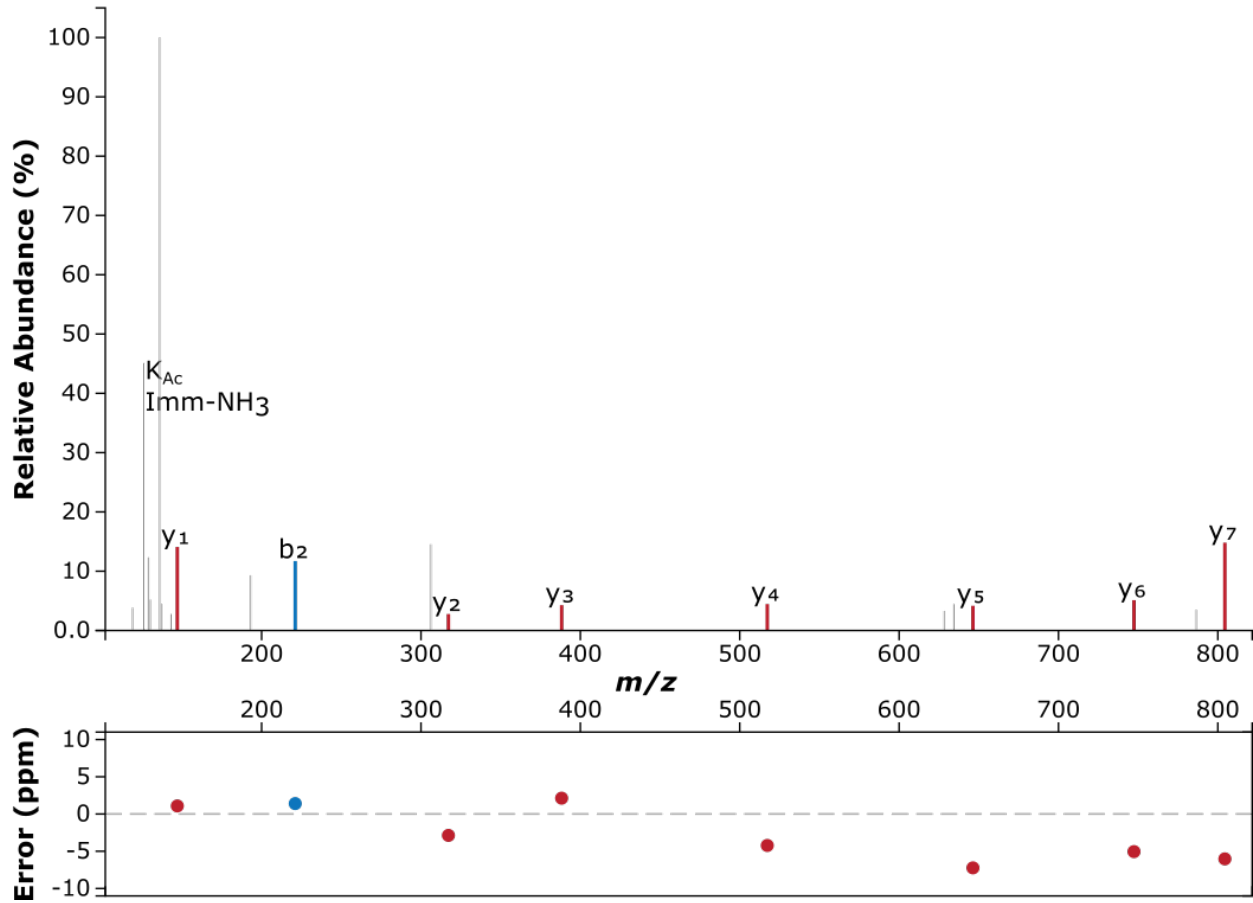

Y G T k P E D L A L I R

Precursor m/z: 709.3879 Charge: +2

Acetyl-CoA acetyltransferase (Q2LXR7)

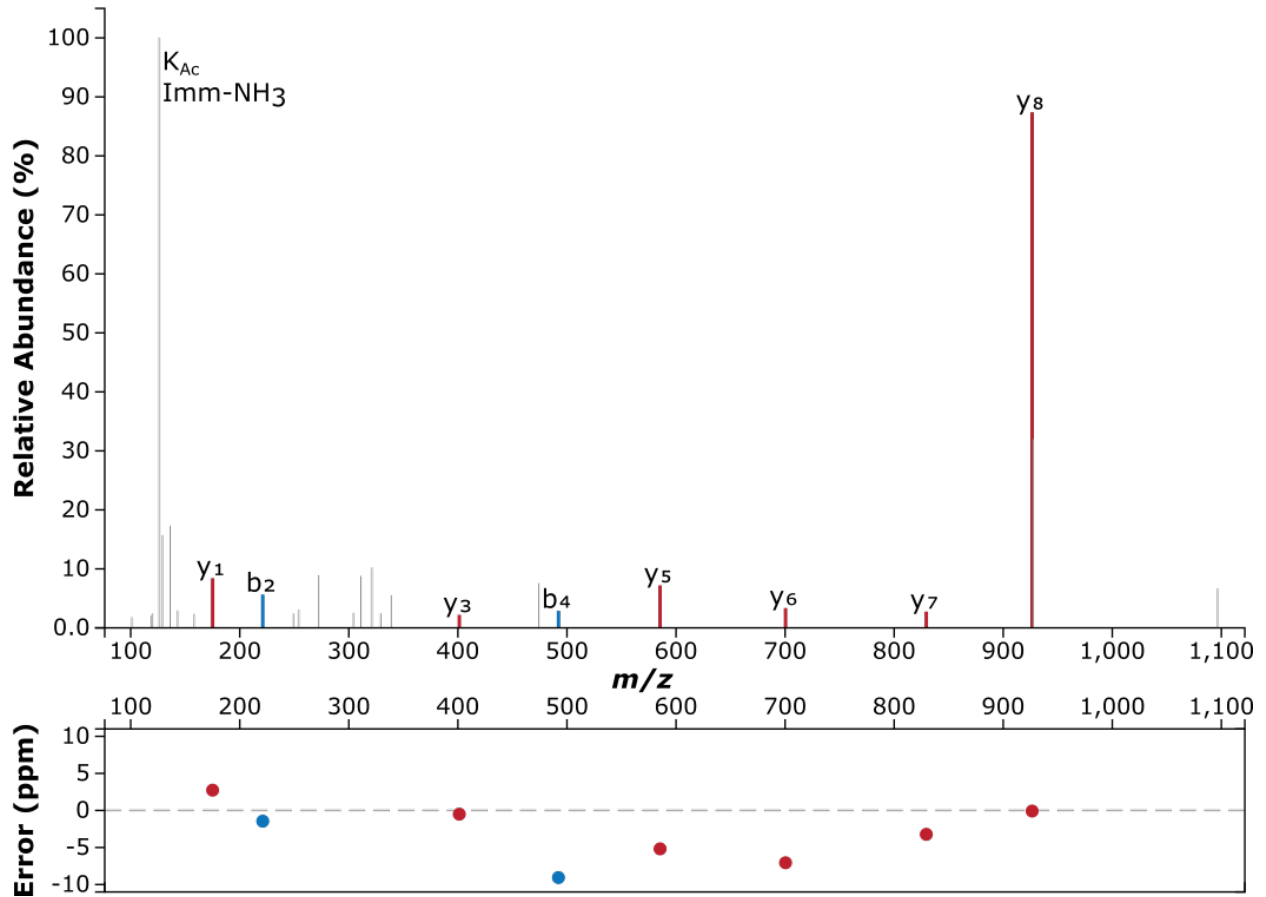

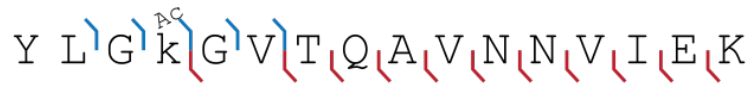

Precursor m/z: 887.9885

Charge: +2

Enolase (Q2LR33)

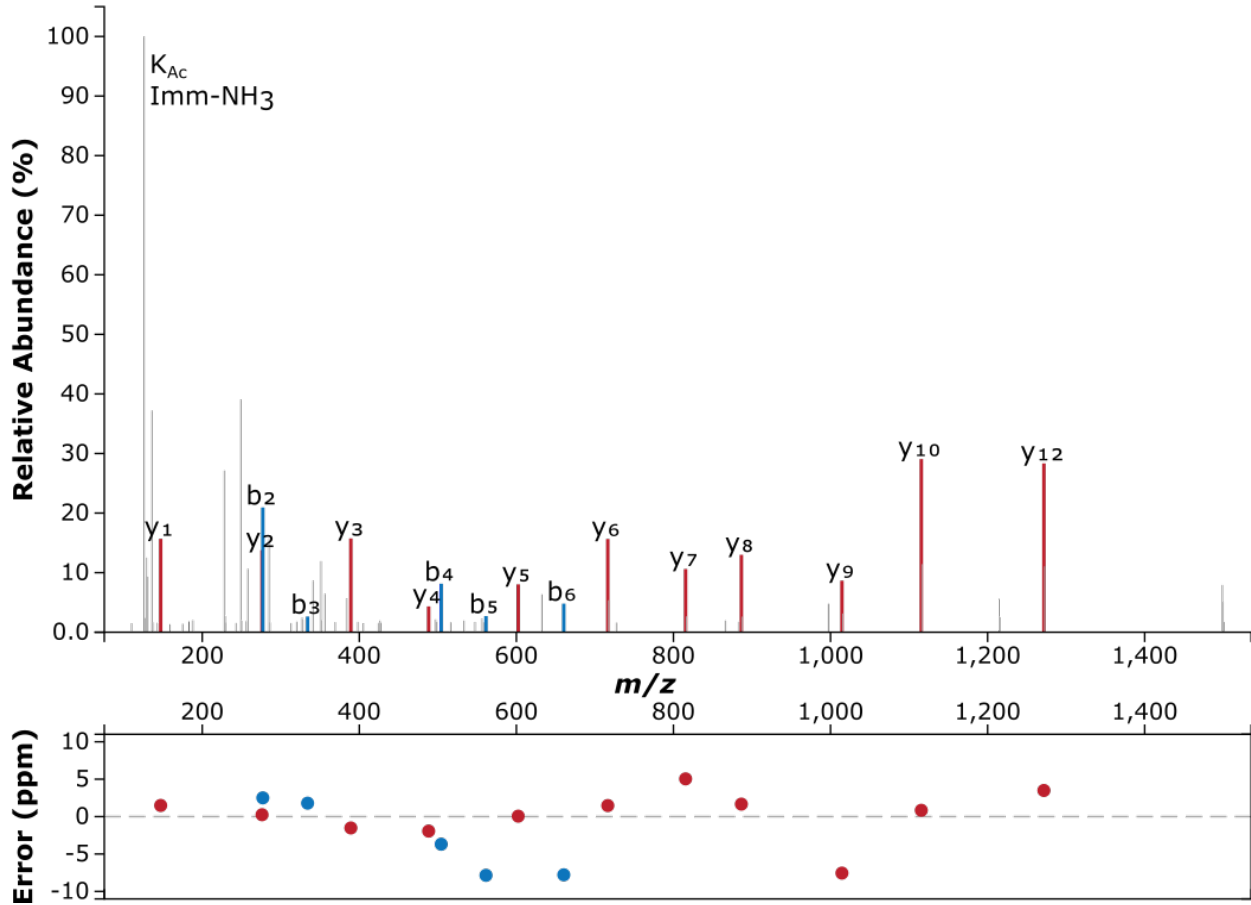

# Benzoyl

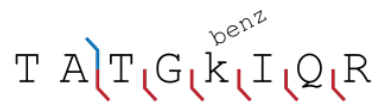

Precursor m/z: 489.7720

Charge: +2

4-hydroxybenzoate-CoA ligase / benzoate-CoA ligase (Q2LRH0, Q2LRH7)

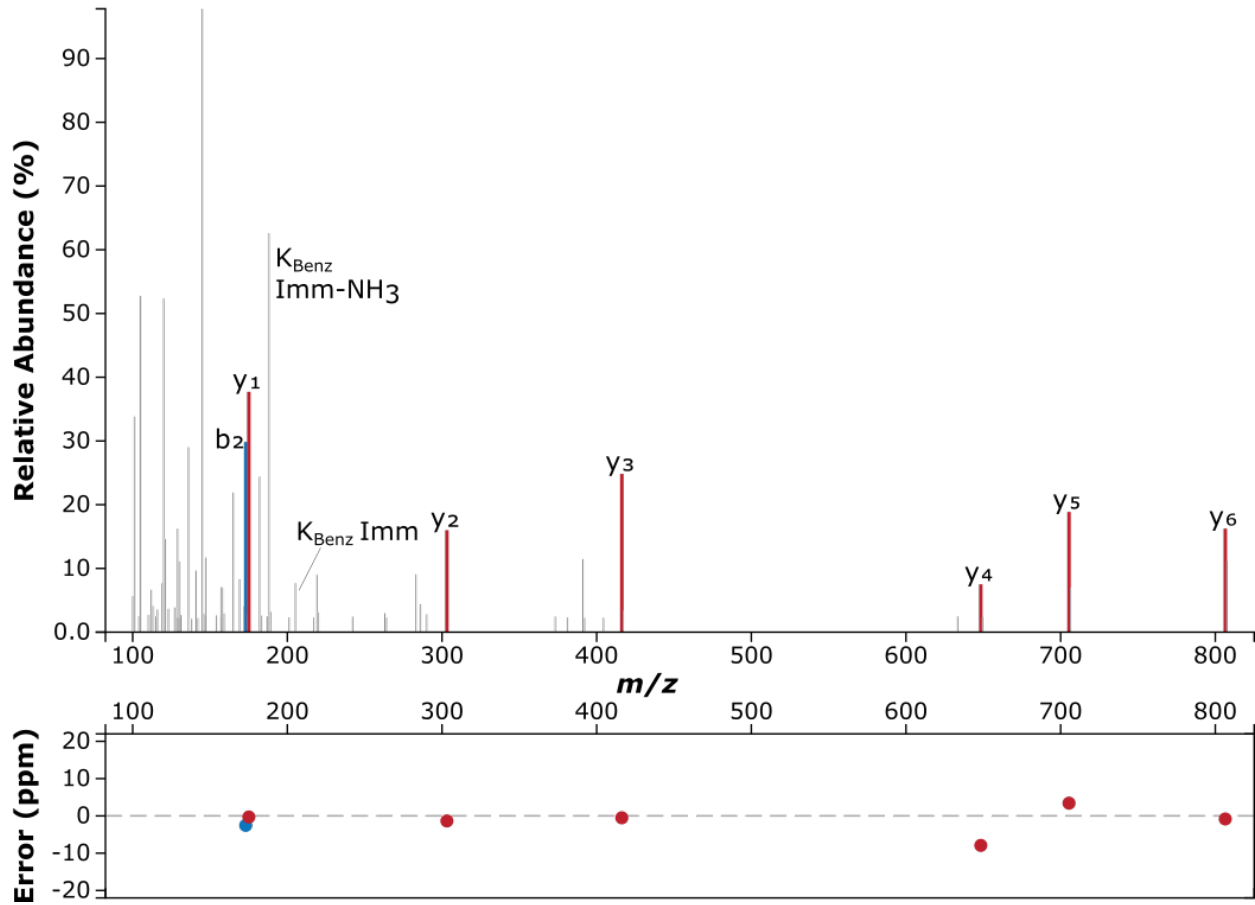

T\G\E\E\A\k\Q\A\R

Precursor m/z: 547.2673

Charge: +2

6-oxocyclohex-1-ene-1-carboxyl-CoA hydrolase (Q2LXU2)

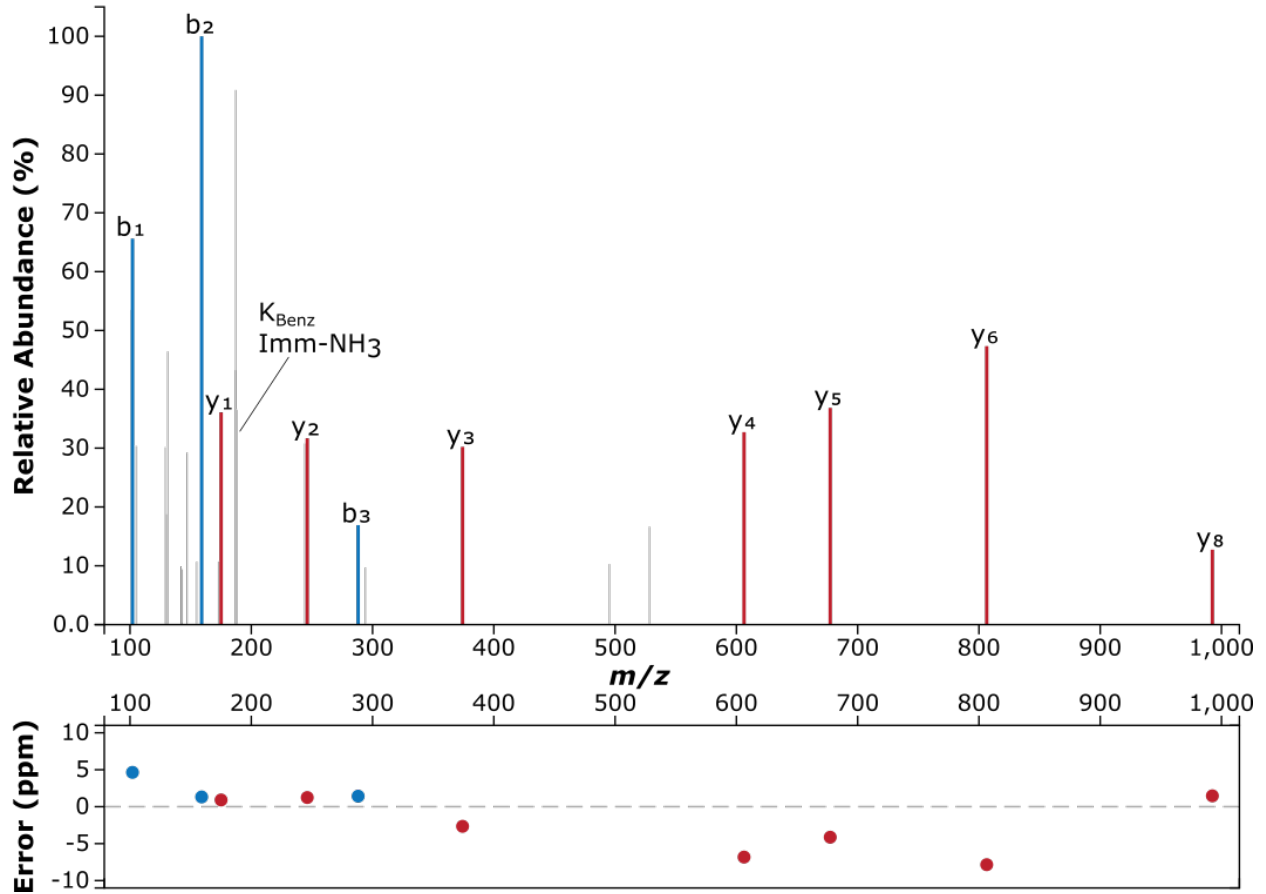



Butyryl

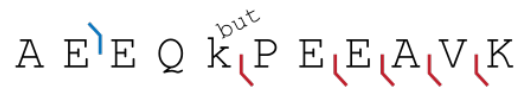

Precursor m/z: 443.2295 Charge: +3

Hypothetical exported protein (Q2LUP5)

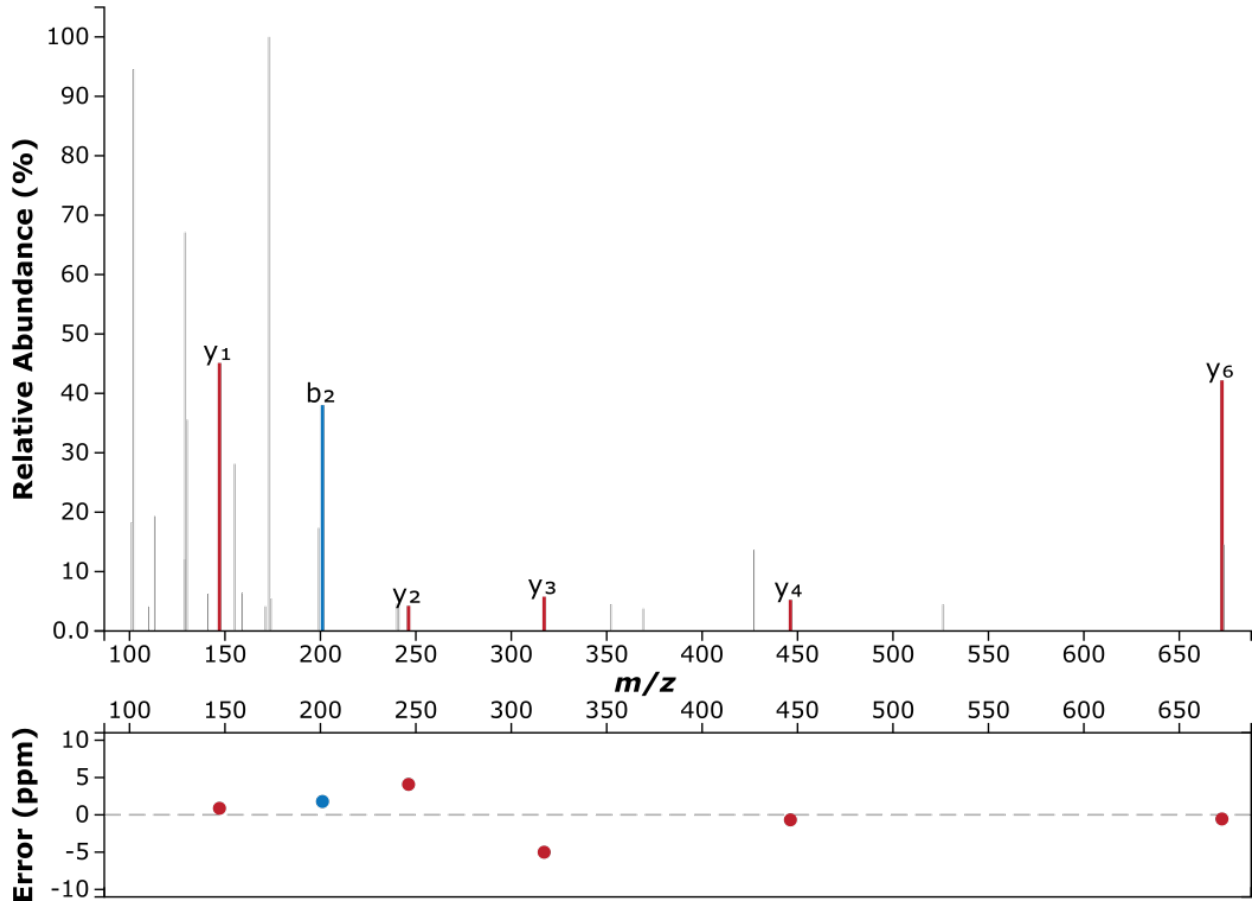

A I A k<sup>But</sup> E G D E W L K

Precursor m/z: 665.3561 Charge: +2  
Acetyl-CoA synthetase (Q2LWR8)

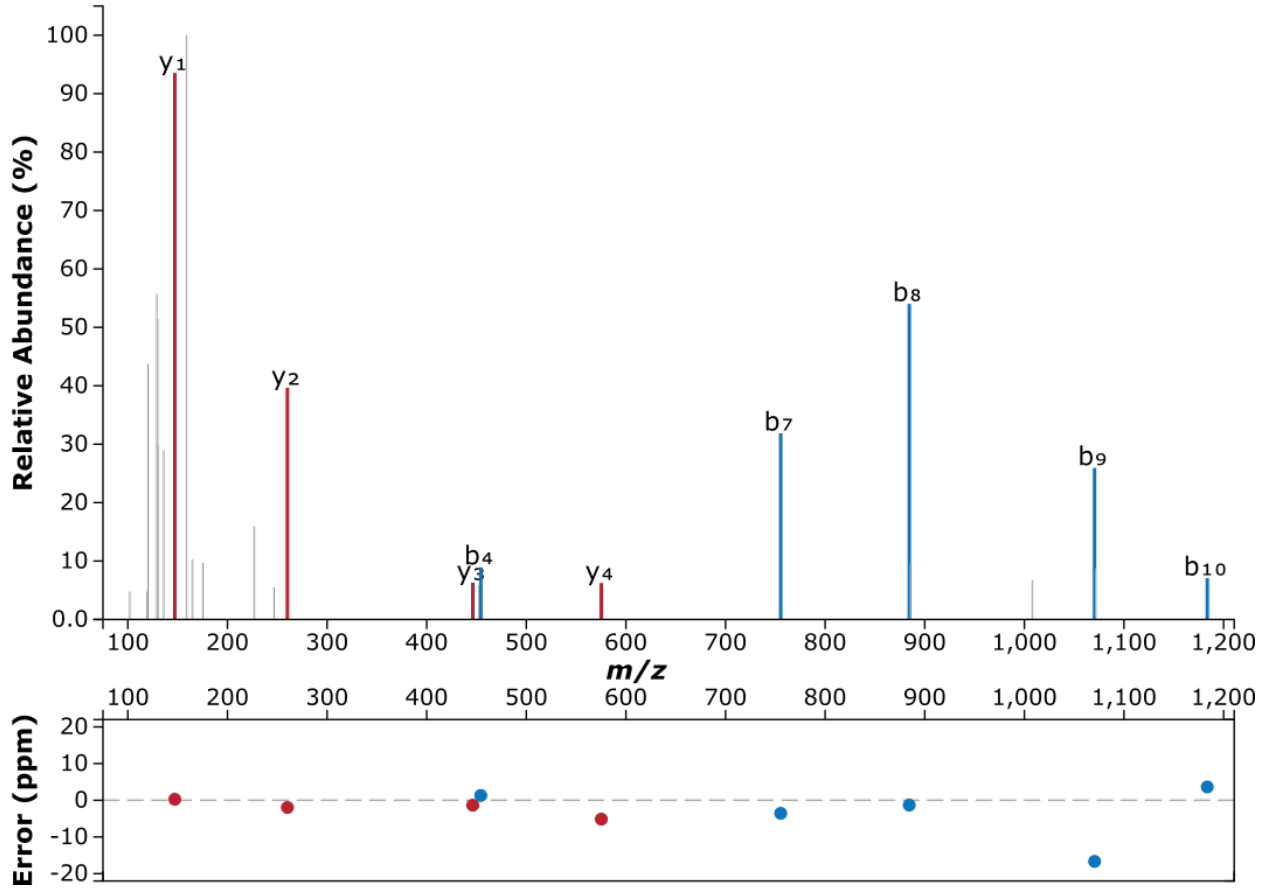

T A T G k I Q R  
<sup>but</sup>

Precursor m/z: 472.7798

Charge: +2

4-hydroxybenzoate-CoA ligase / benzoate-CoA ligase (Q2LRH0, Q2LRH7)

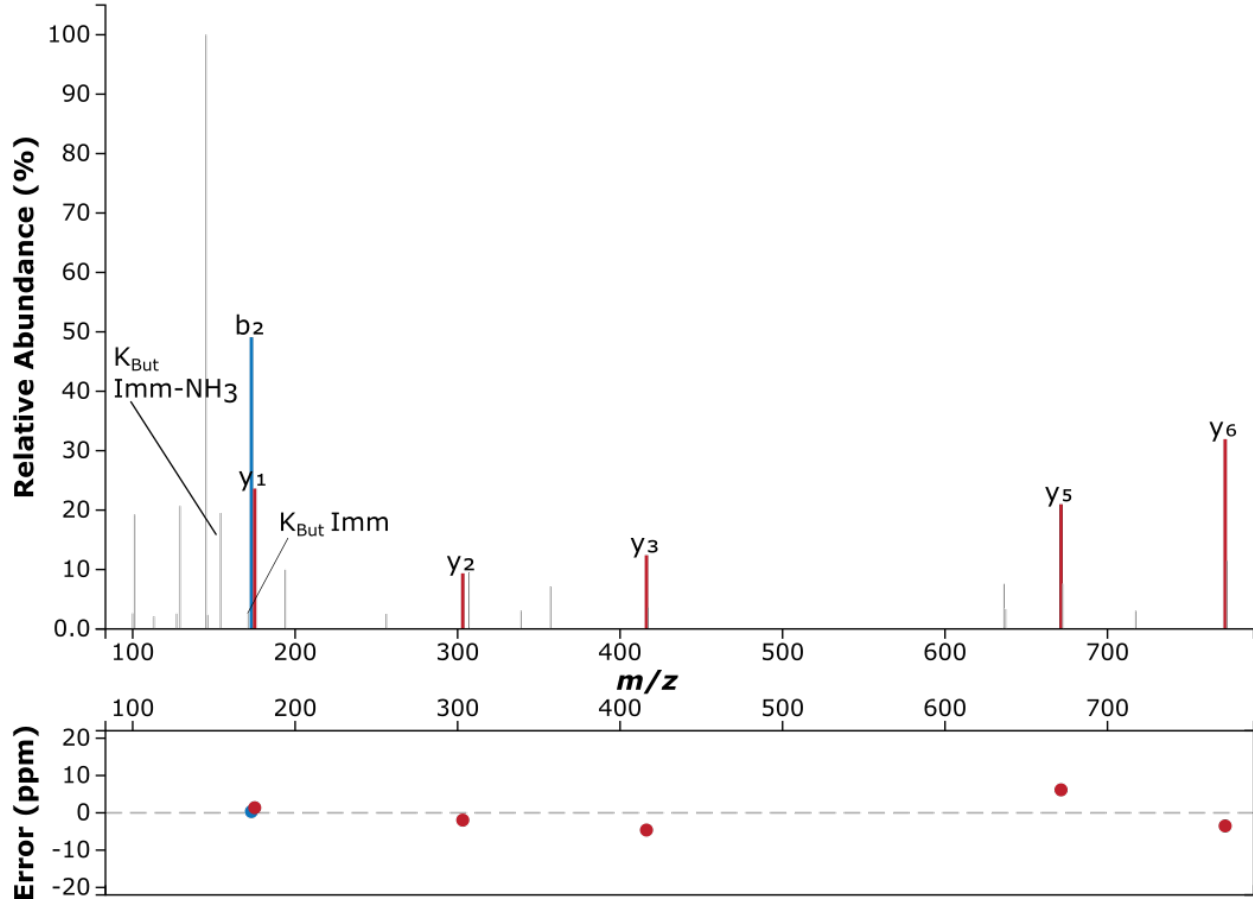

# Crotonyl

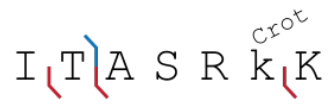

Precursor m/z: 436.2716

Charge: +2

Acetyl-CoA synthetase / acetyltransferase (GNAT) family protein (Q2LUQ3)

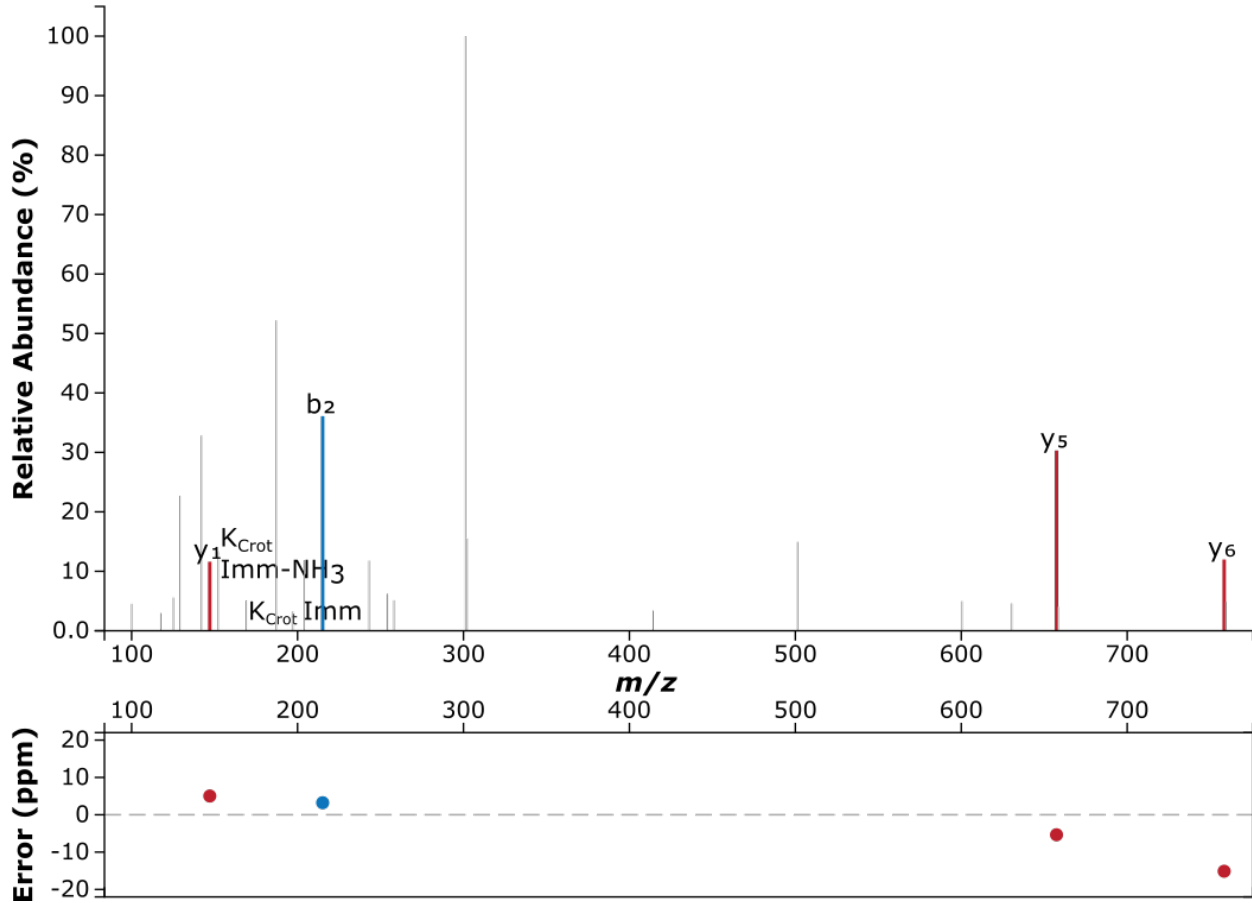

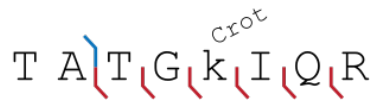

Precursor m/z: 471.7720

Charge: +2

4-hydroxybenzoate-CoA ligase / benzoate-CoA ligase (Q2LRH0, Q2LRH7)

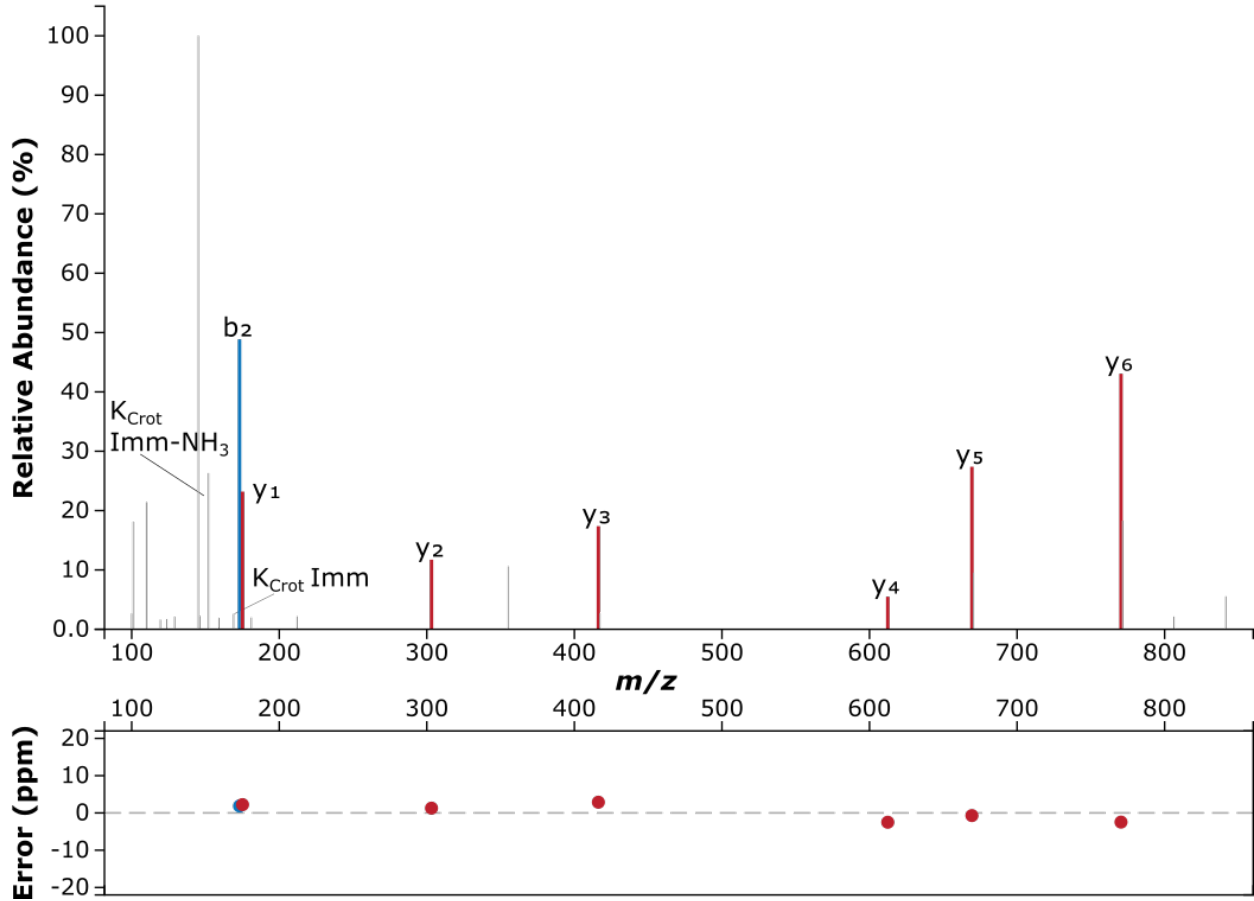

# Glutaryl

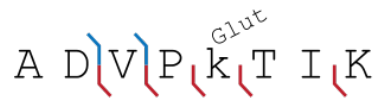

Precursor m/z: 493.2819

Charge: +2

6-hydroxycyclohex-1-ene-1-carboxyl-CoA dehydrogenase (Q2LXU3)

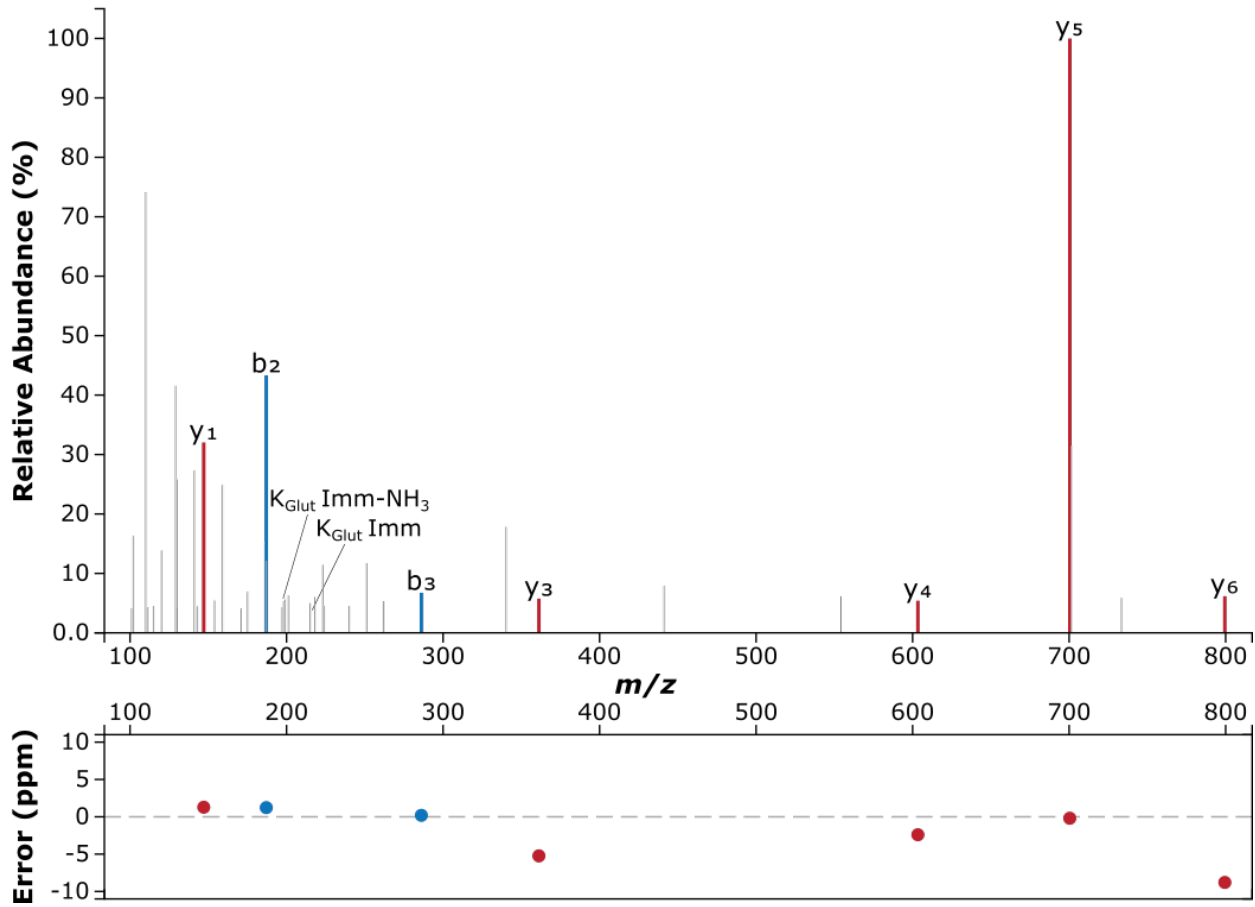

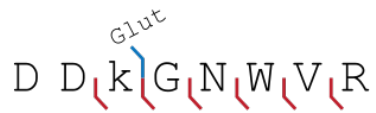

Precursor m/z: 552.2594

Charge: +2

6-oxocyclohex-1-ene-1-carboxyl-CoA hydrolase (Q2LXU2)

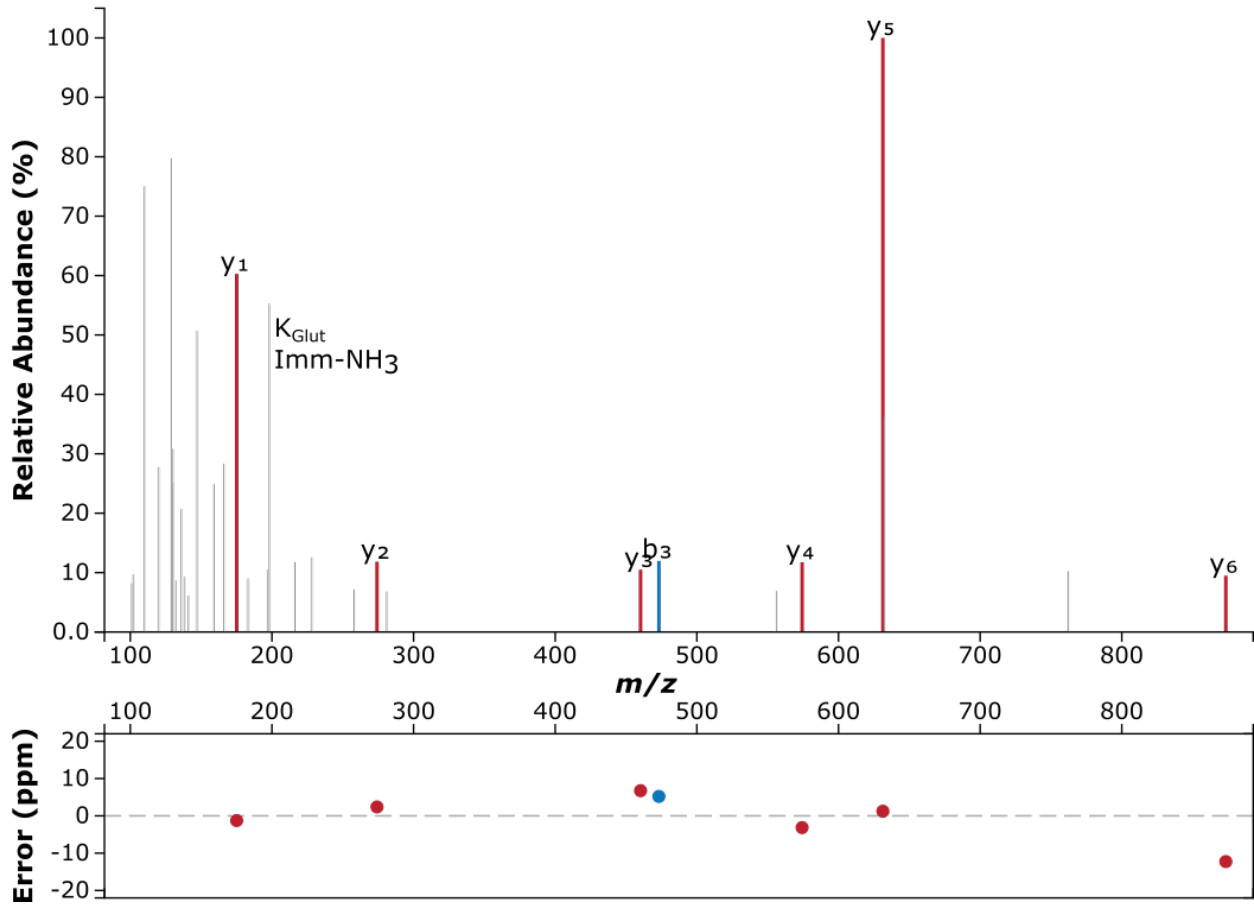

E L k <sup>Glut</sup> Q W V L D R

Precursor m/z: 650.8484

Charge: +2

4-hydroxybenzoate-CoA ligase / benzoate-CoA ligase (Q2LRH0, Q2LRH7)

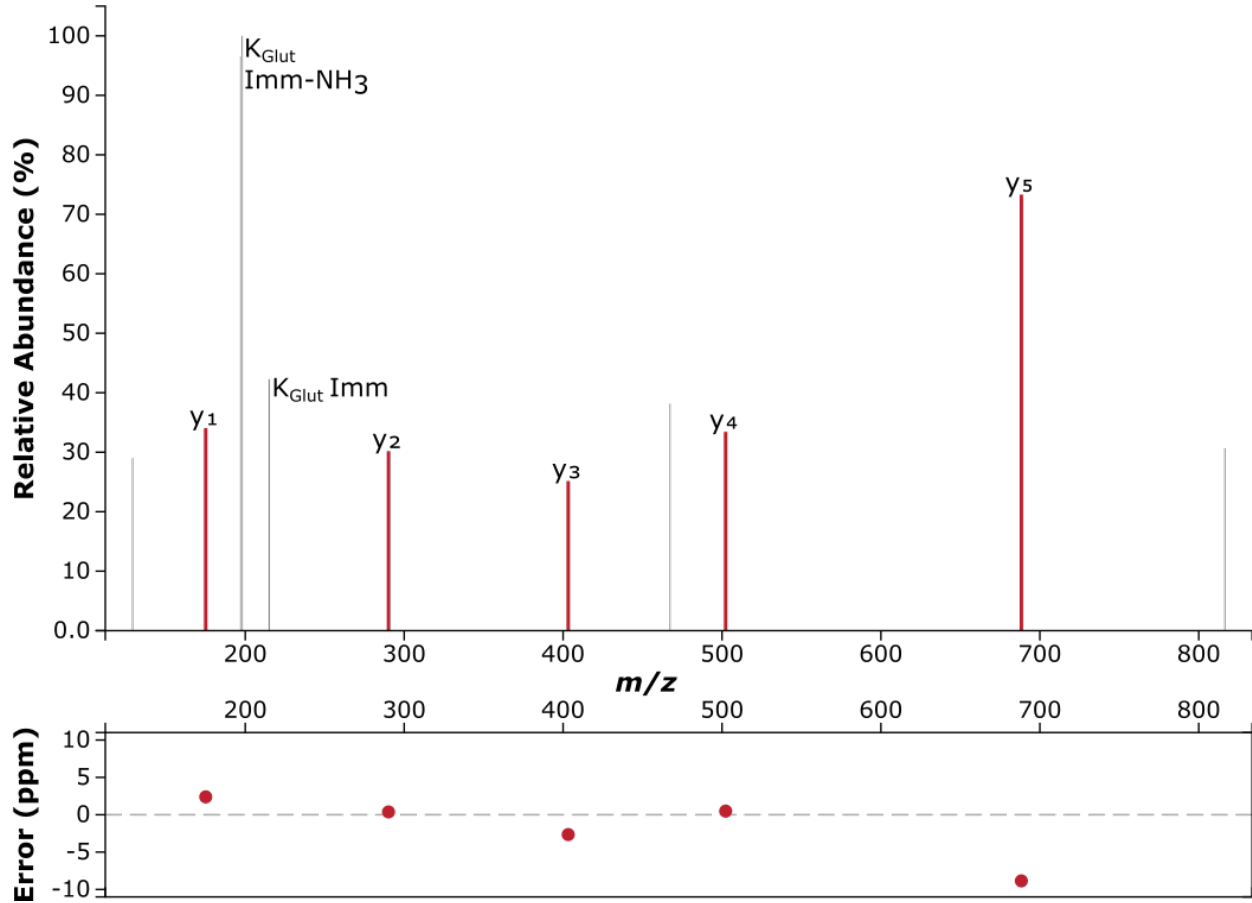



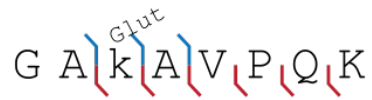

Precursor m/z: 456.7611 Charge: +2  
 Acetyl-CoA synthetase (Q2LWR8)

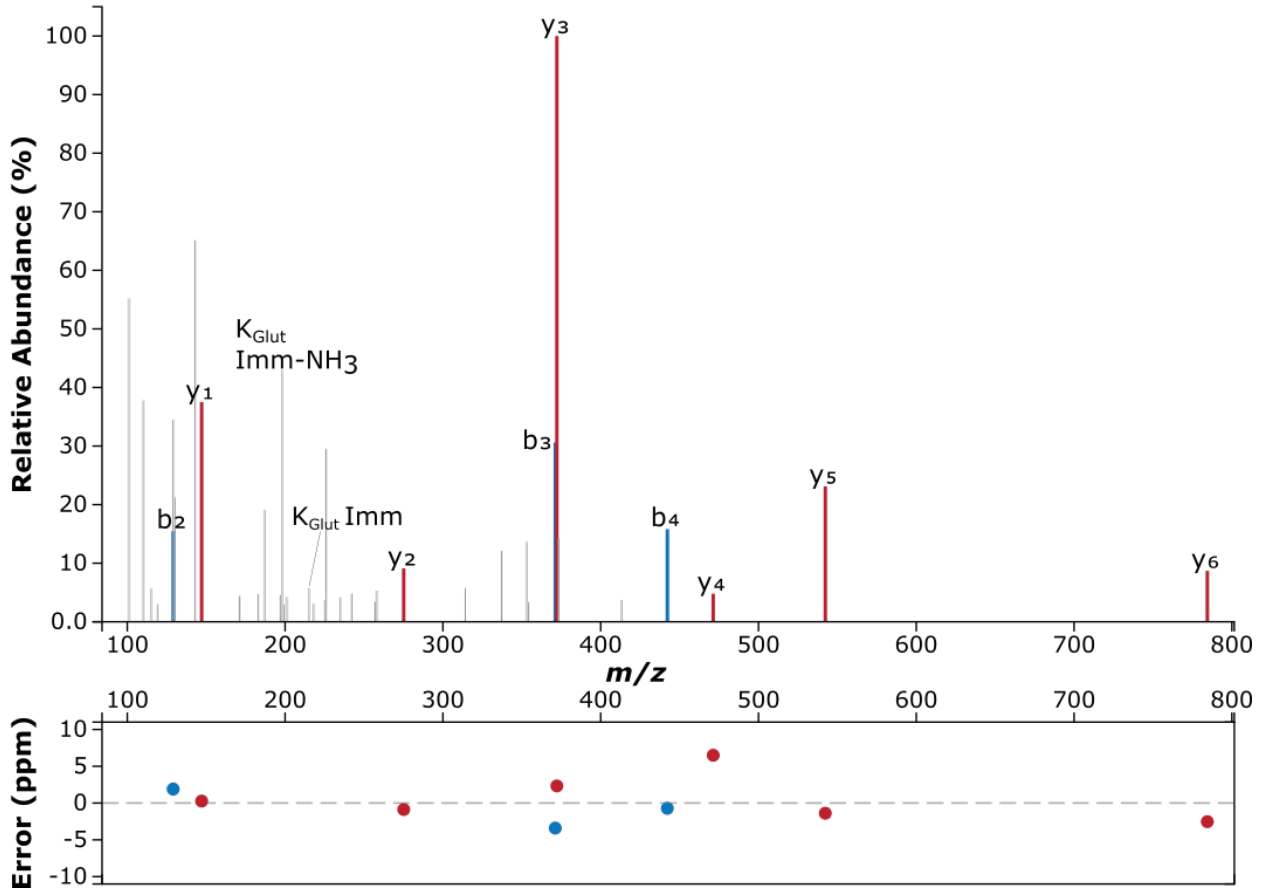

S N k<sup>Glut</sup> D V m G E Y R

Precursor m/z: 664.7930

Charge: +2

6-hydroxycyclohex-1-ene-1-carboxyl-CoA dehydrogenase (Q2LXU3)

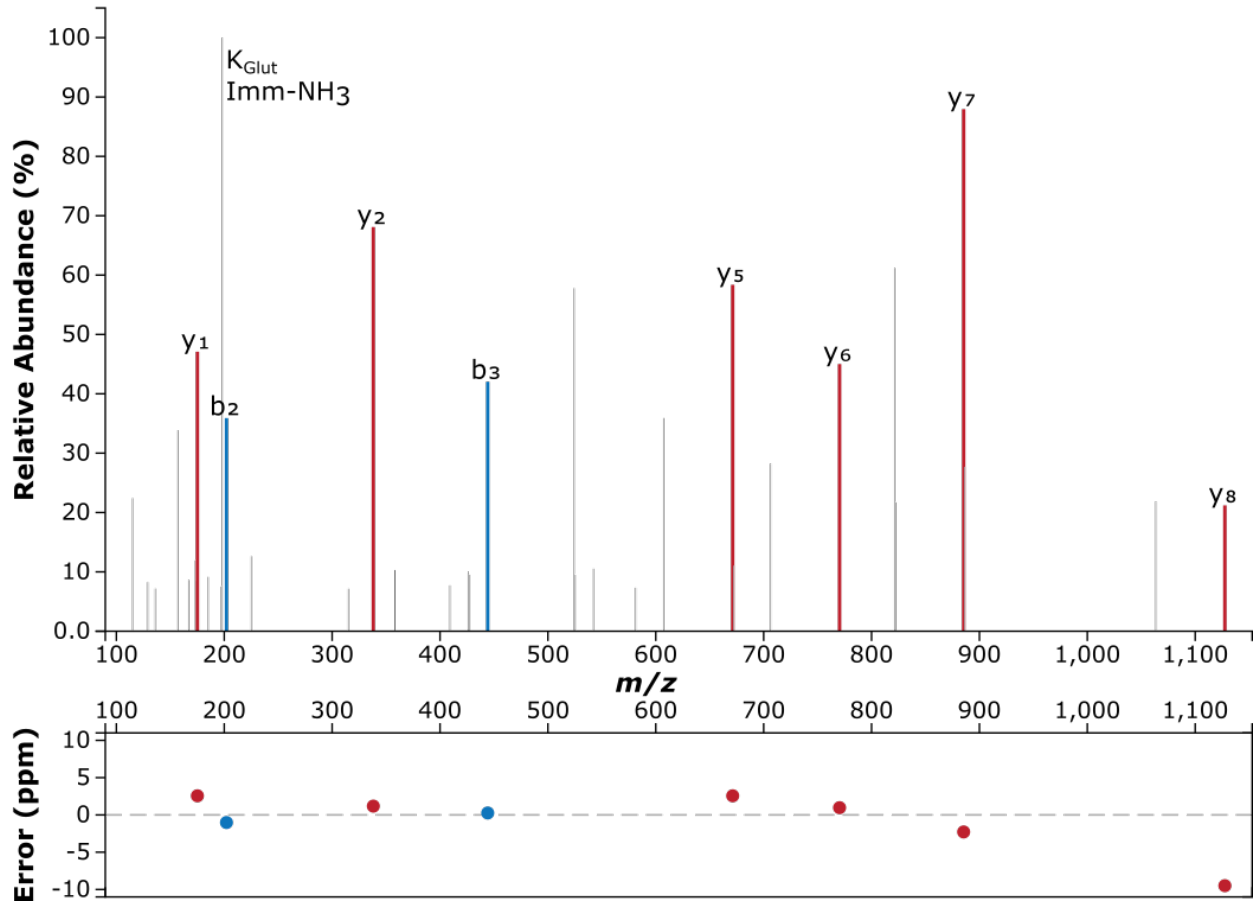

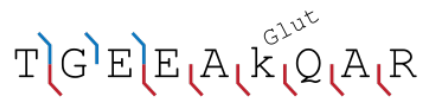

Precursor  $m/z$ : 552.2700 Charge: +2  
 6-oxocyclohex-1-ene-1-carbonyl-CoA hydrolase (Q2LXU2)

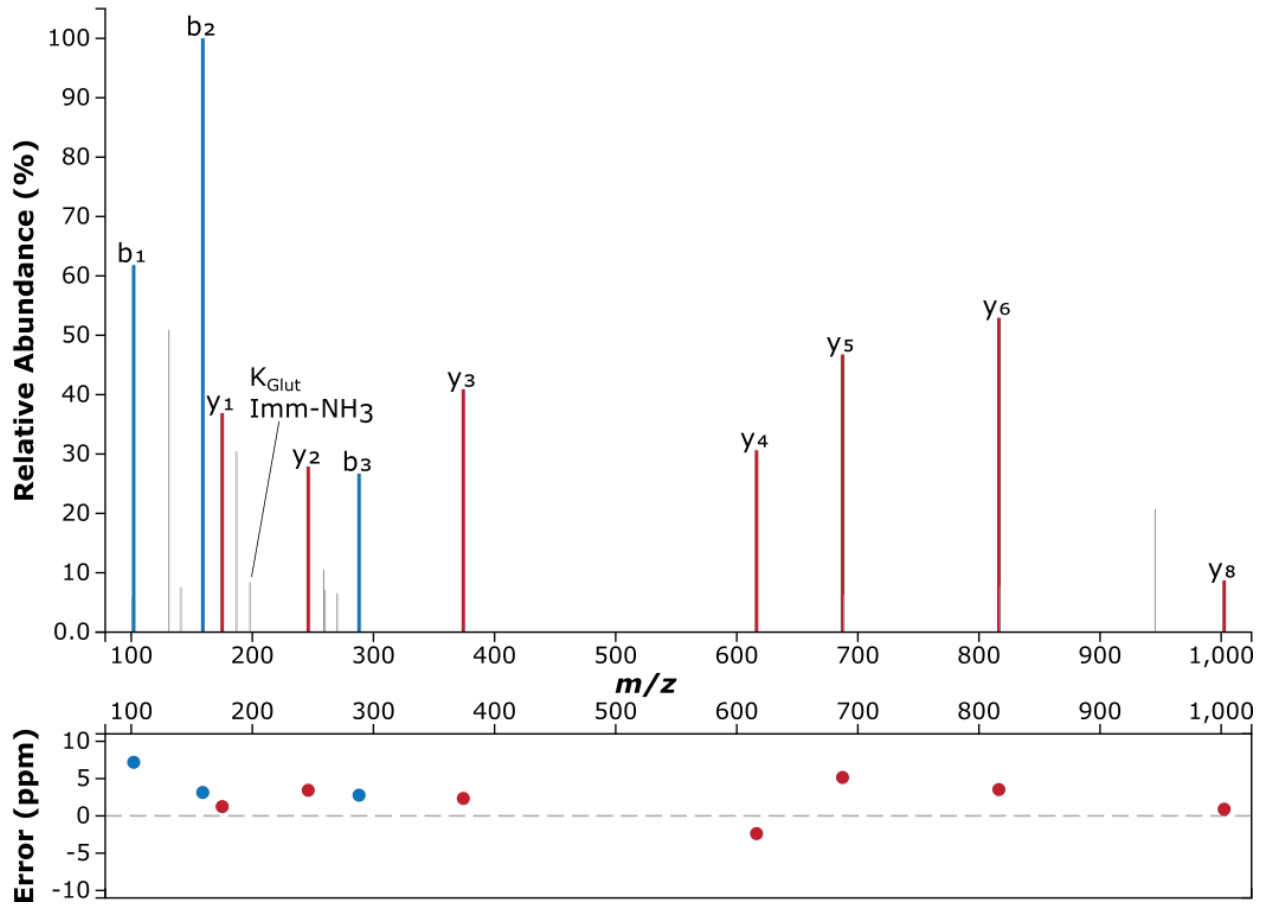

# 3-Hydroxybutyryl

3-OH Butyryl  
D k T A A T V I G E W V N S G D K

Precursor m/z: 626.3144 Charge: +3

4-hydroxybenzoate-CoA ligase / benzoate-CoA ligase (Q2LRH7)

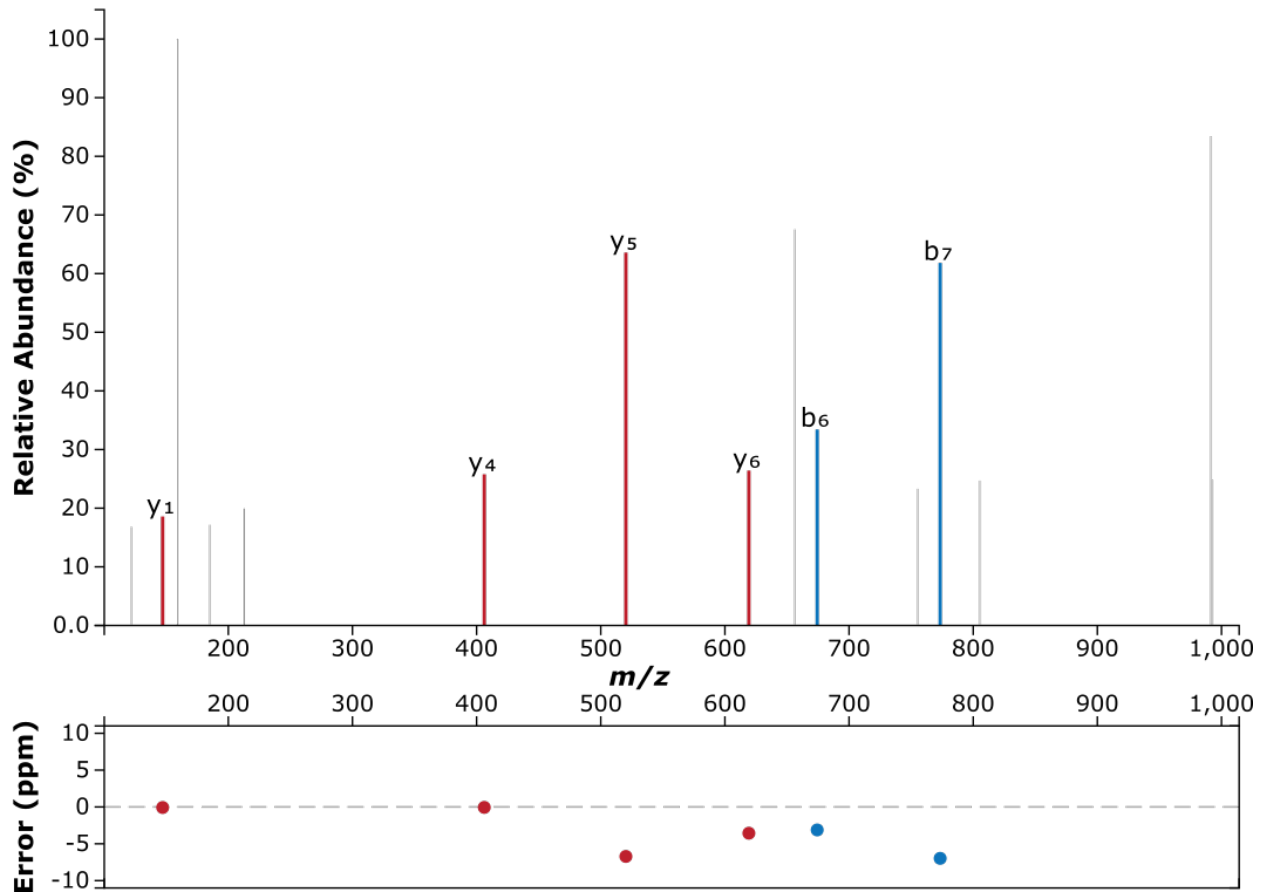

3-OH Butyryl  
E L k Q W V L D R

Precursor m/z: 424.9031

Charge: +3

4-hydroxybenzoate-CoA ligase / benzoate-CoA ligase (Q2LRH0,Q2LRH7)

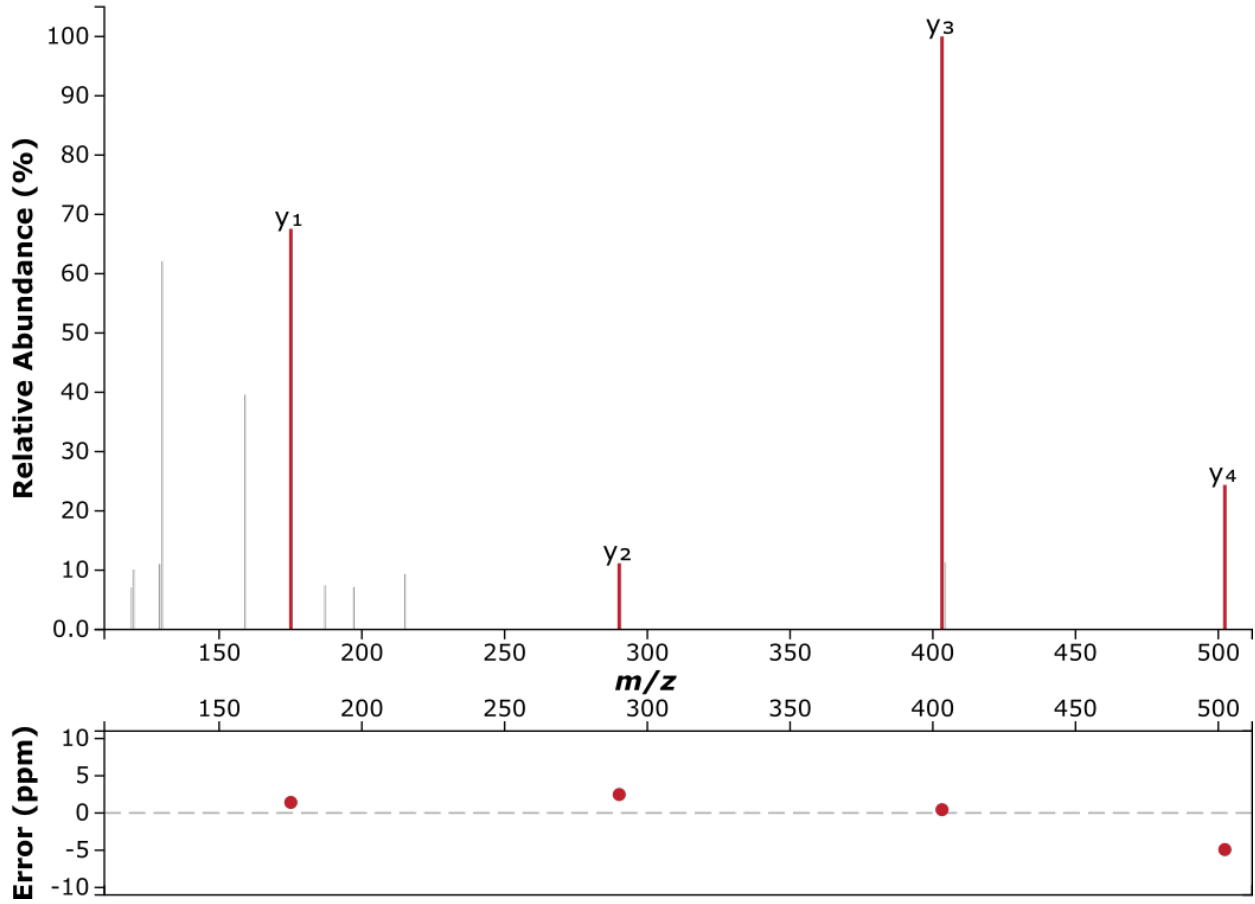

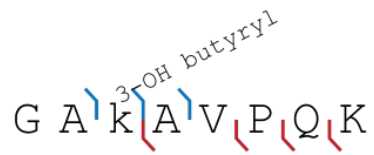

Precursor m/z: 442.7636

Charge: +2

Acetyl-CoA synthetase (Q2LWR8)

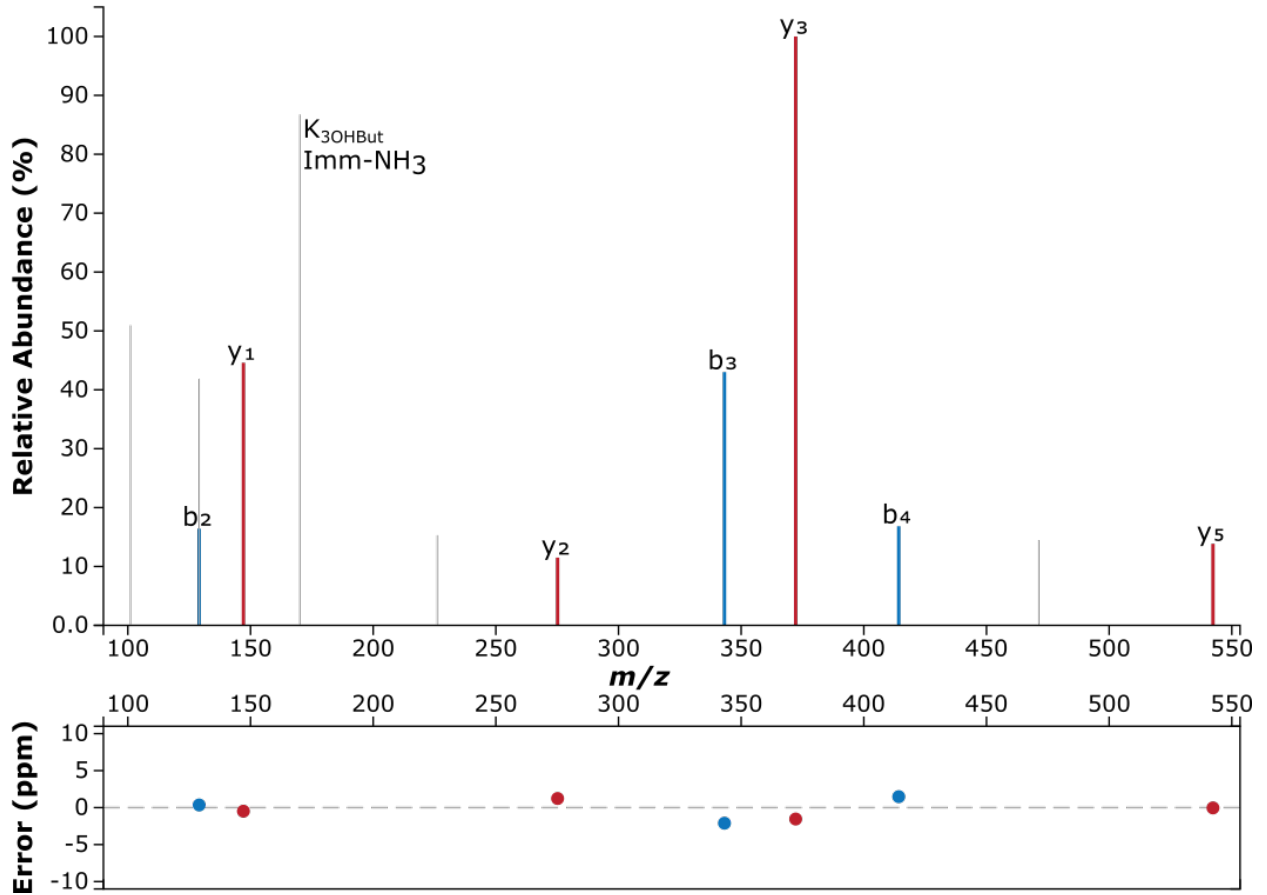

<sup>3-OH butyryl</sup>  
 S N k D V M G E Y R

Precursor m/z: 428.8678

Charge: +3

6-hydroxycyclohex-1-ene-1-carboxyl-CoA dehydrogenase (Q2LXU3)

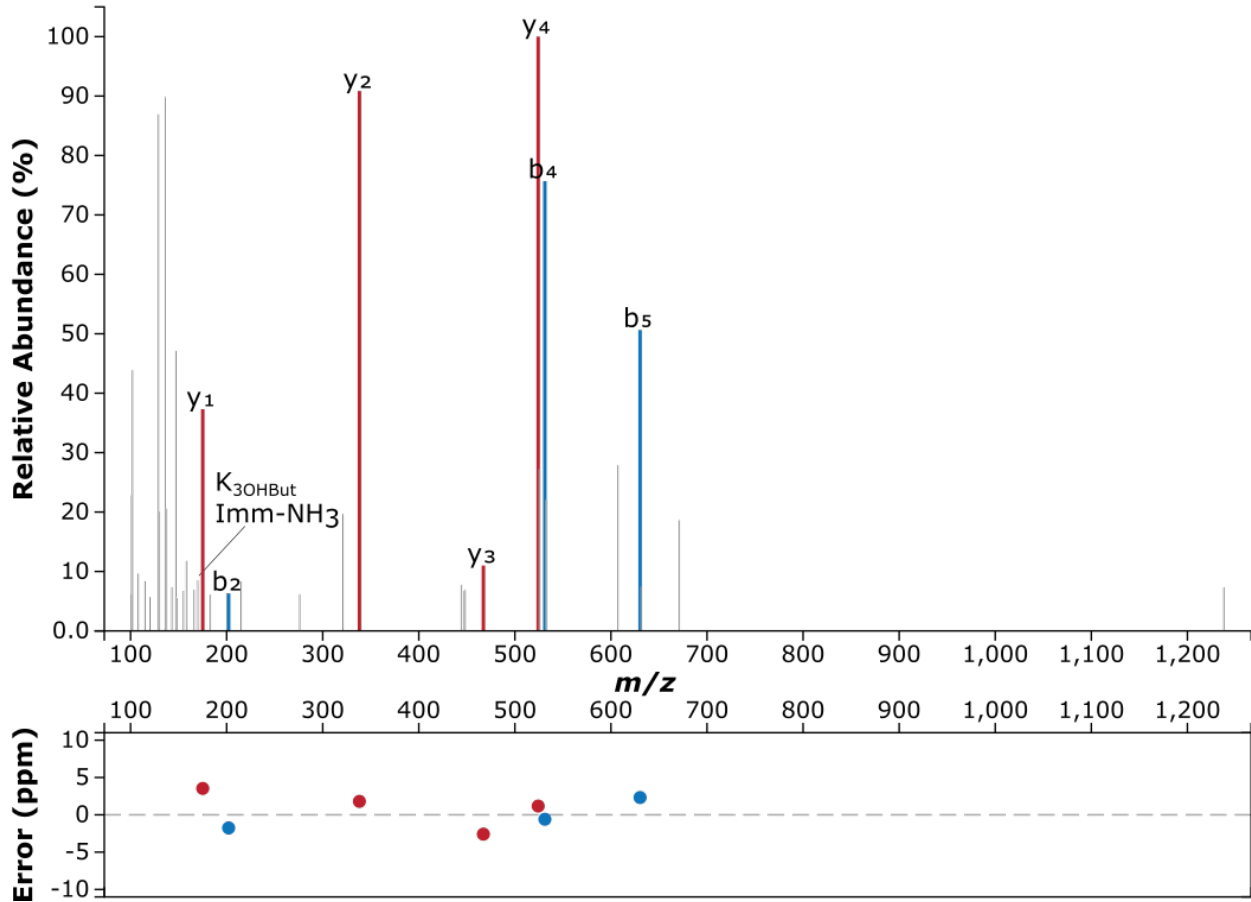

T A T G k I Q R  
<sup>3-OH Butyryl</sup>

Precursor m/z: 480.7773

Charge: +2

4-hydroxybenzoate-CoA ligase / benzoate-CoA ligase (Q2LRH0, Q2LRH7)

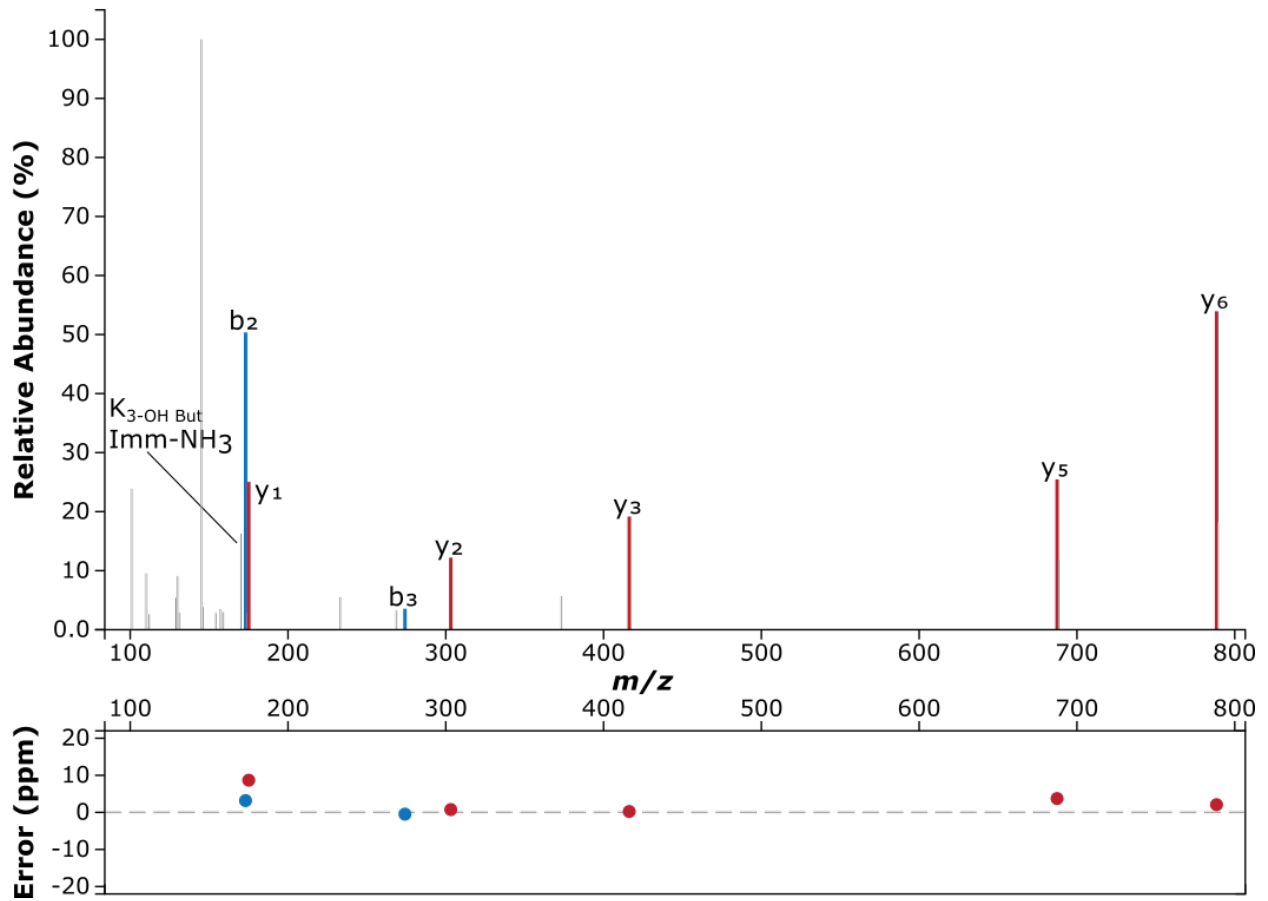



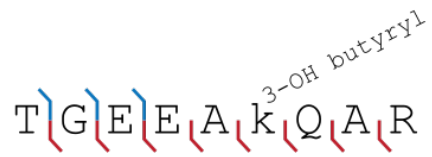

Precursor m/z: 538.2725

Charge: +2

6-oxocyclohex-1-ene-1-carbonyl-CoA hydrolase (Q2LXU2)

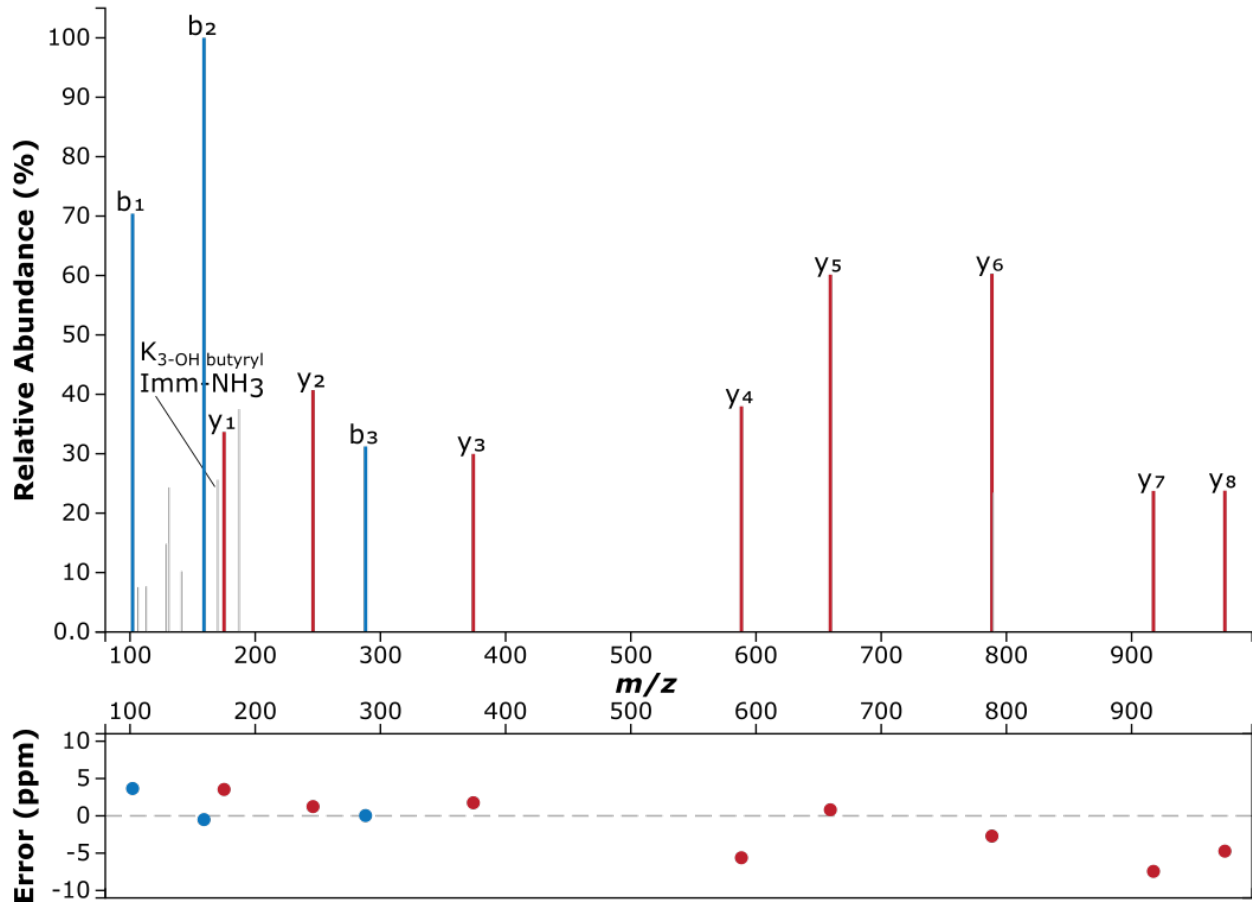

# 3-Hydroxypimelyl

A F V V L N Q G F A Q S P E L E k E L K

3-OH Pimelyl

Precursor m/z: 802.4248

Charge: +3

4-hydroxybenzoate-CoA ligase / benzoate-CoA ligase (Q2LRH0)

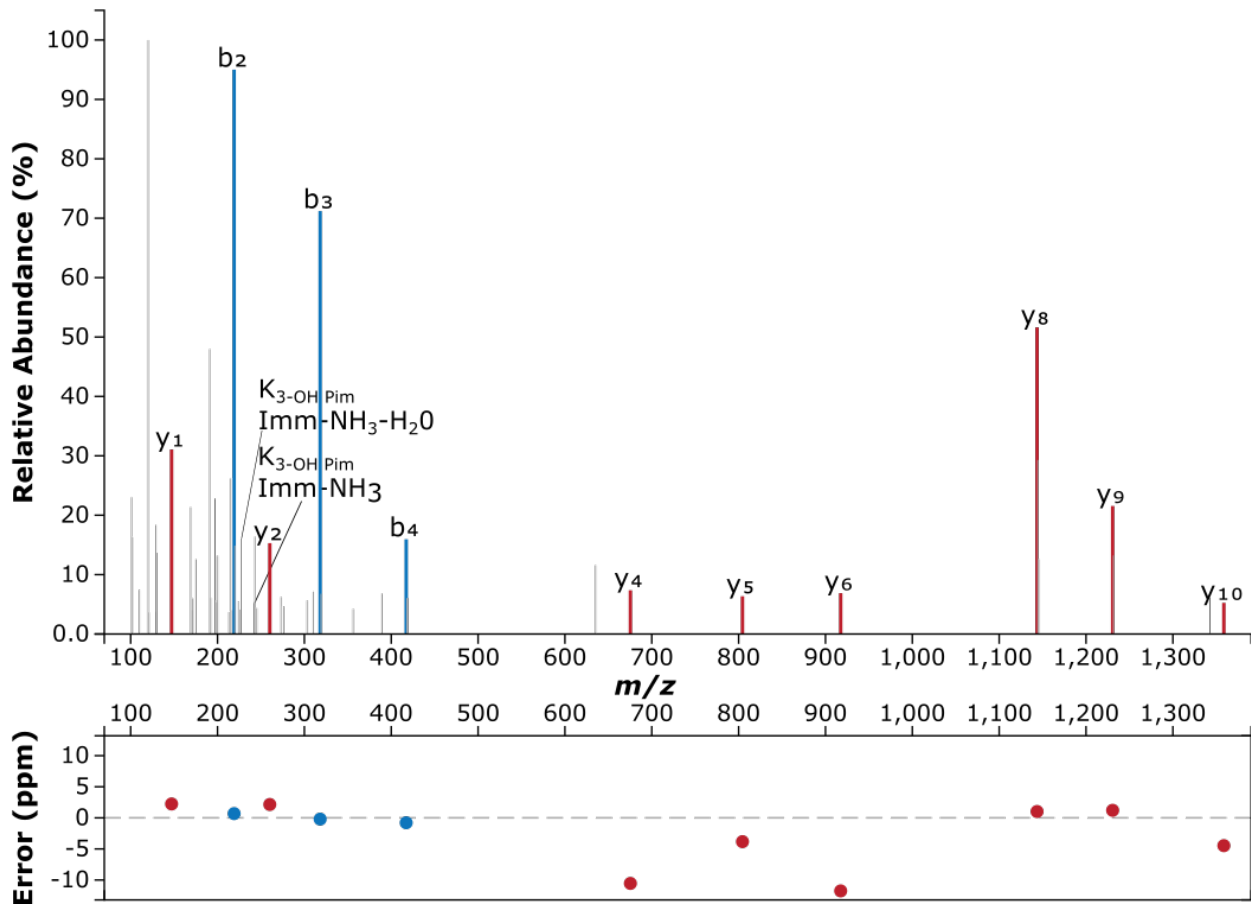

A<sub>1</sub>G<sub>1</sub>S<sub>1</sub>P<sub>1</sub>E<sub>1</sub>k<sub>1</sub>R<sub>1</sub><sup>3-OH pimelyl</sup>

Precursor m/z: 451.7325

Charge: +2

6-hydroxycyclohex-1-ene-1-carboxyl-CoA dehydrogenase (Q2LXU3)

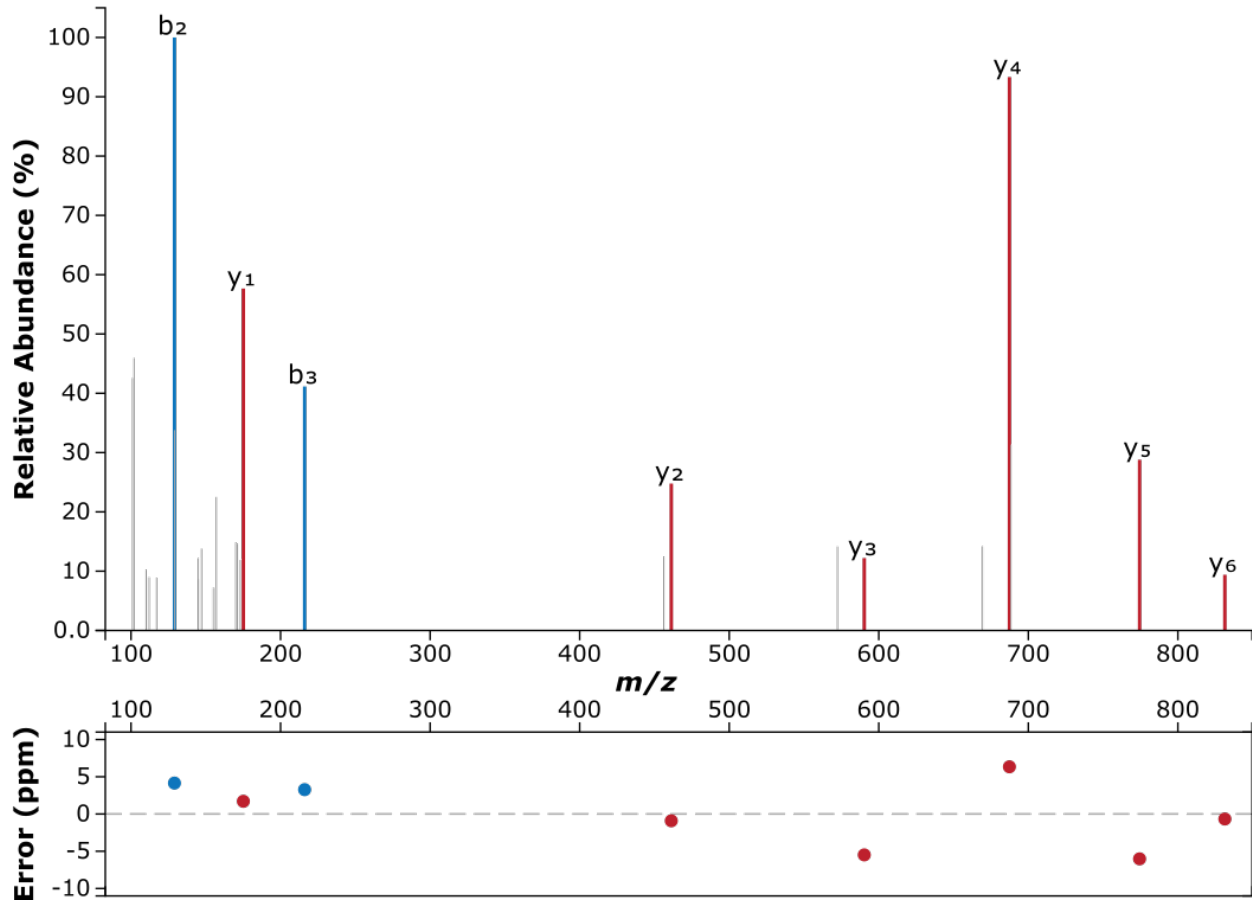

E A A Q k F m A D F T S K  
<sup>3-OH Pimelyl</sup>  
<sup>ox</sup>

Precursor m/z: 824.3822 Charge: +2

Putative enoyl-CoA hydratase (Q2LXU6)

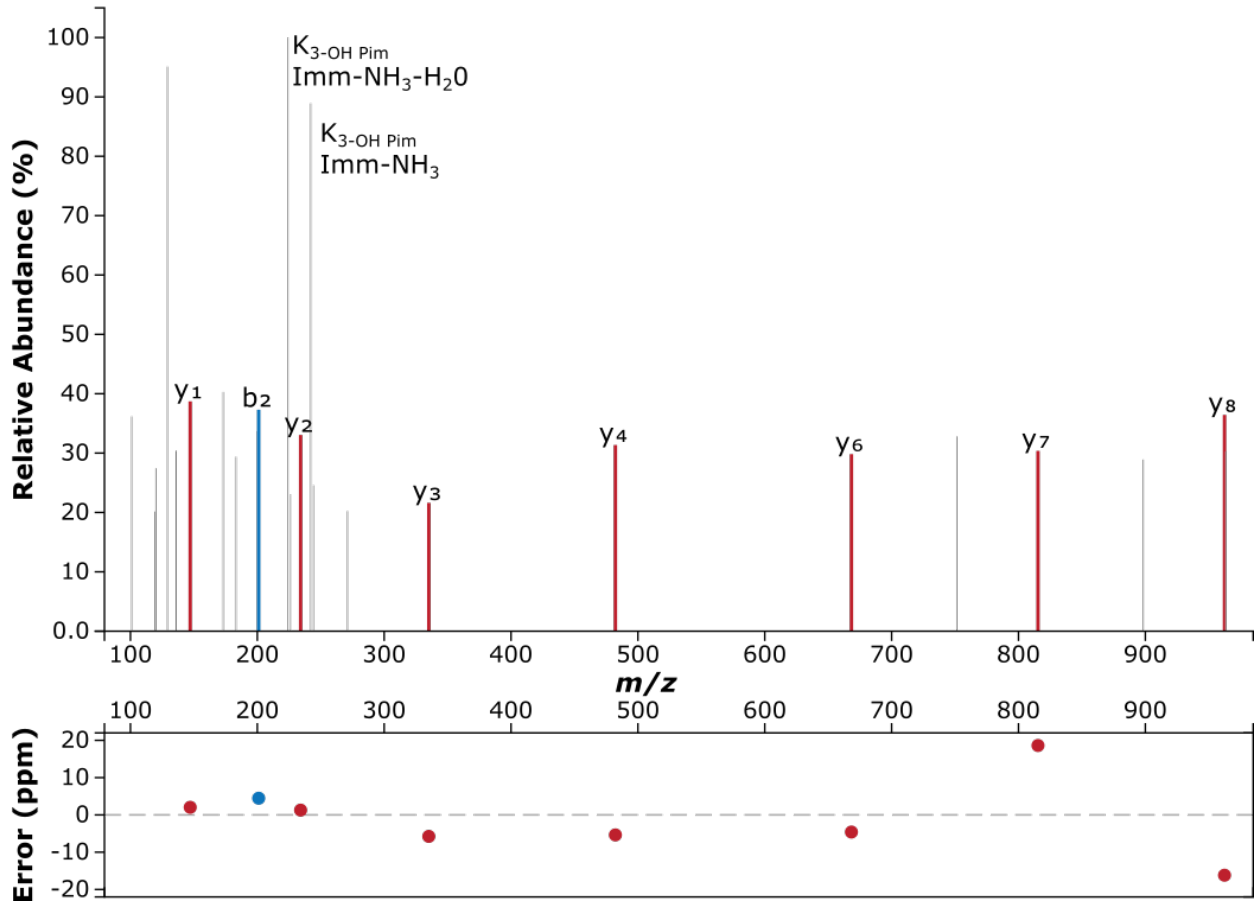

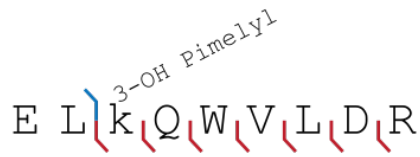

Precursor m/z: 672.8615

Charge: +2

4-hydroxybenzoate-CoA ligase / benzoate-CoA ligase (Q2LRH0, Q2LRH7)

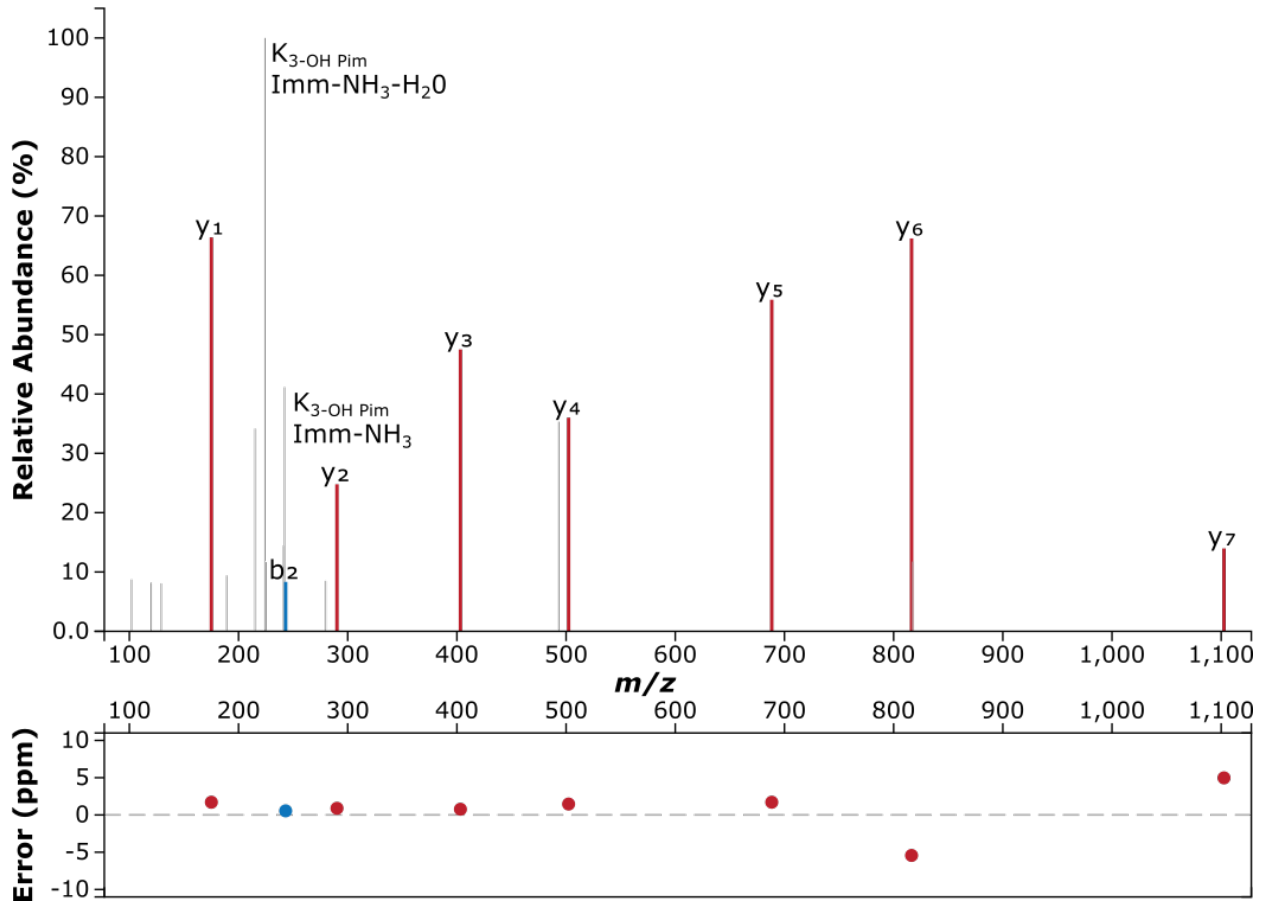

E N L L G k P G D G A K  
<sup>3-OH Pimelyl</sup>

Precursor m/z: 678.8539

Charge: +2

Acyl-CoA dehydrogenase, short-chain specific (Q2LUY8)

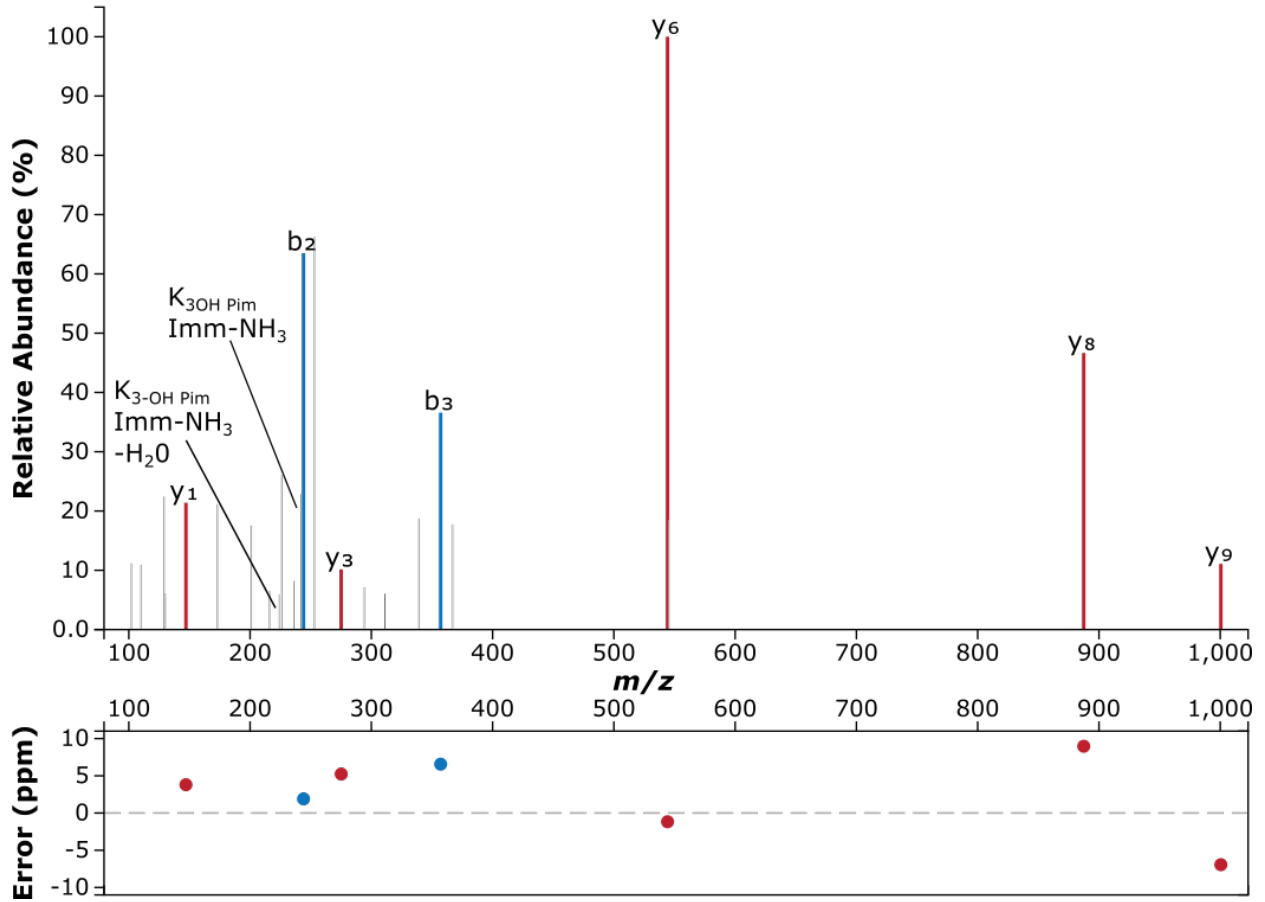

<sup>3-OH Pimelyl</sup>  
 E T G E k I P G Q L Q L T E I P V P E L K

Precursor m/z: 826.4510

Charge: +3

6-hydroxycyclohex-1-ene-1-carboxyl-CoA dehydrogenase (Q2LXU3)

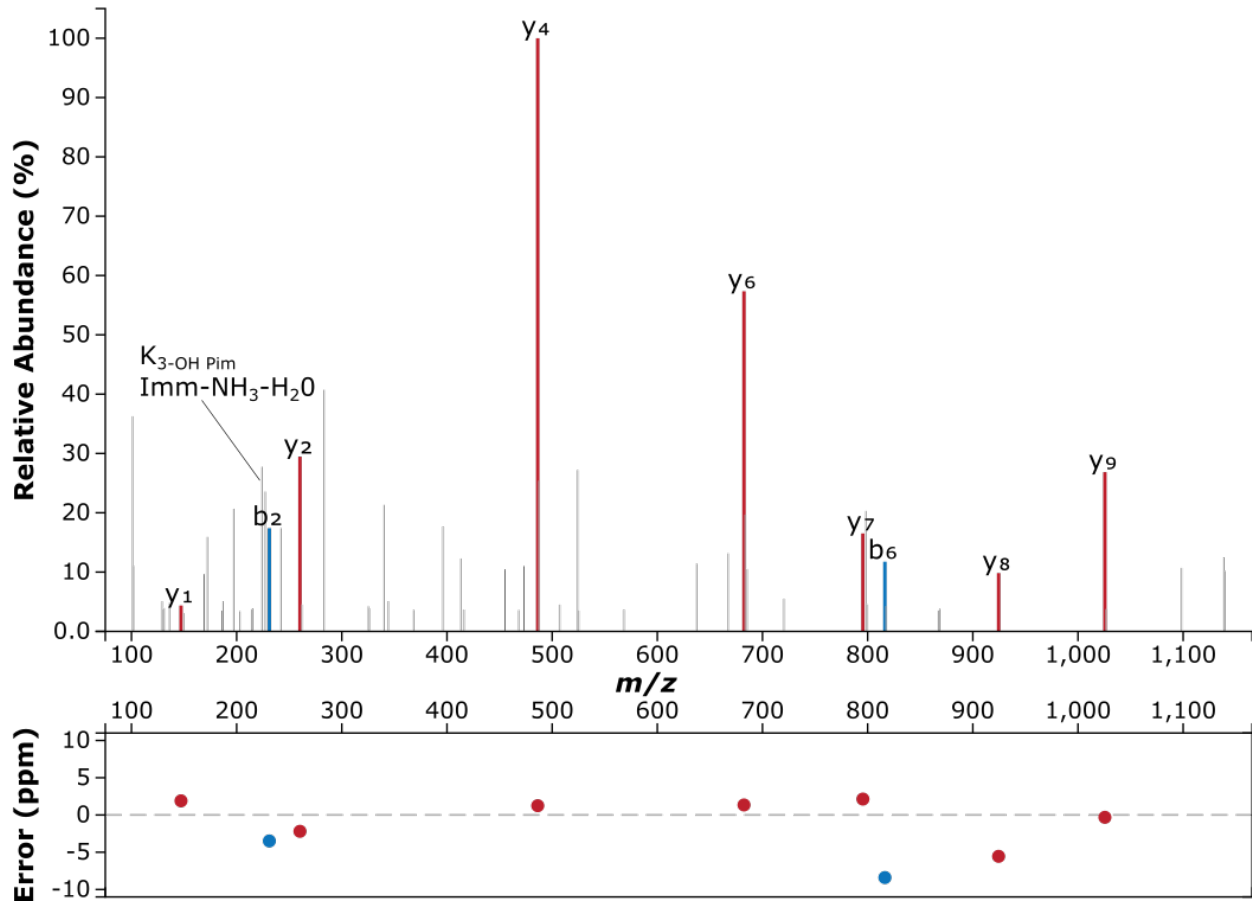

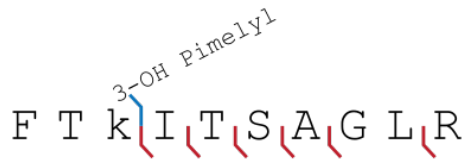

Precursor m/z: 626.3508

Charge: +2

Inosine-5'-monophosphate dehydrogenase (Q2LTT4)

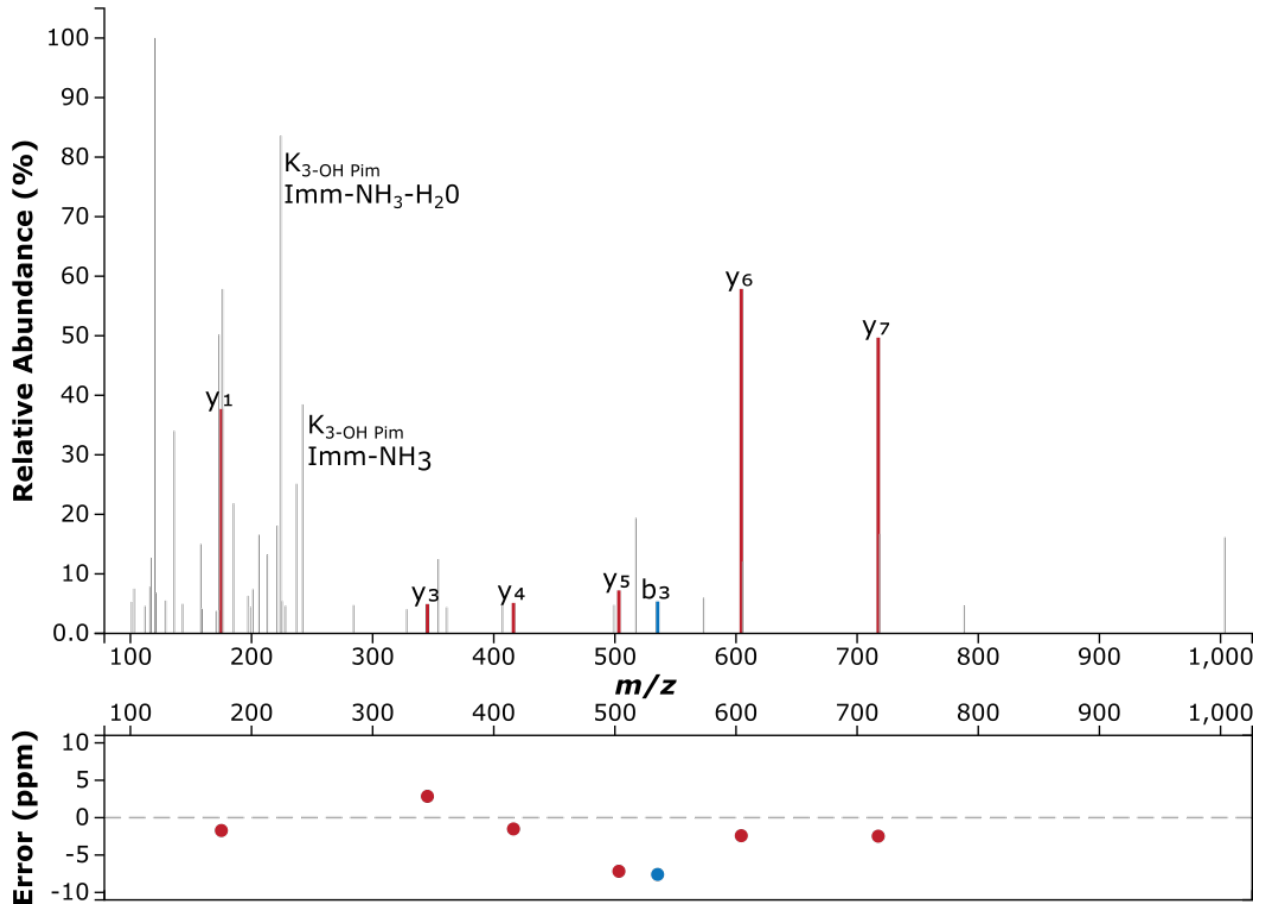



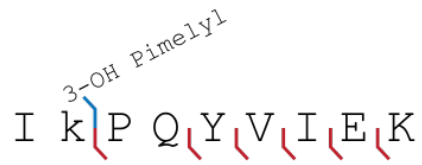

Precursor m/z: 638.3634

Charge: +2

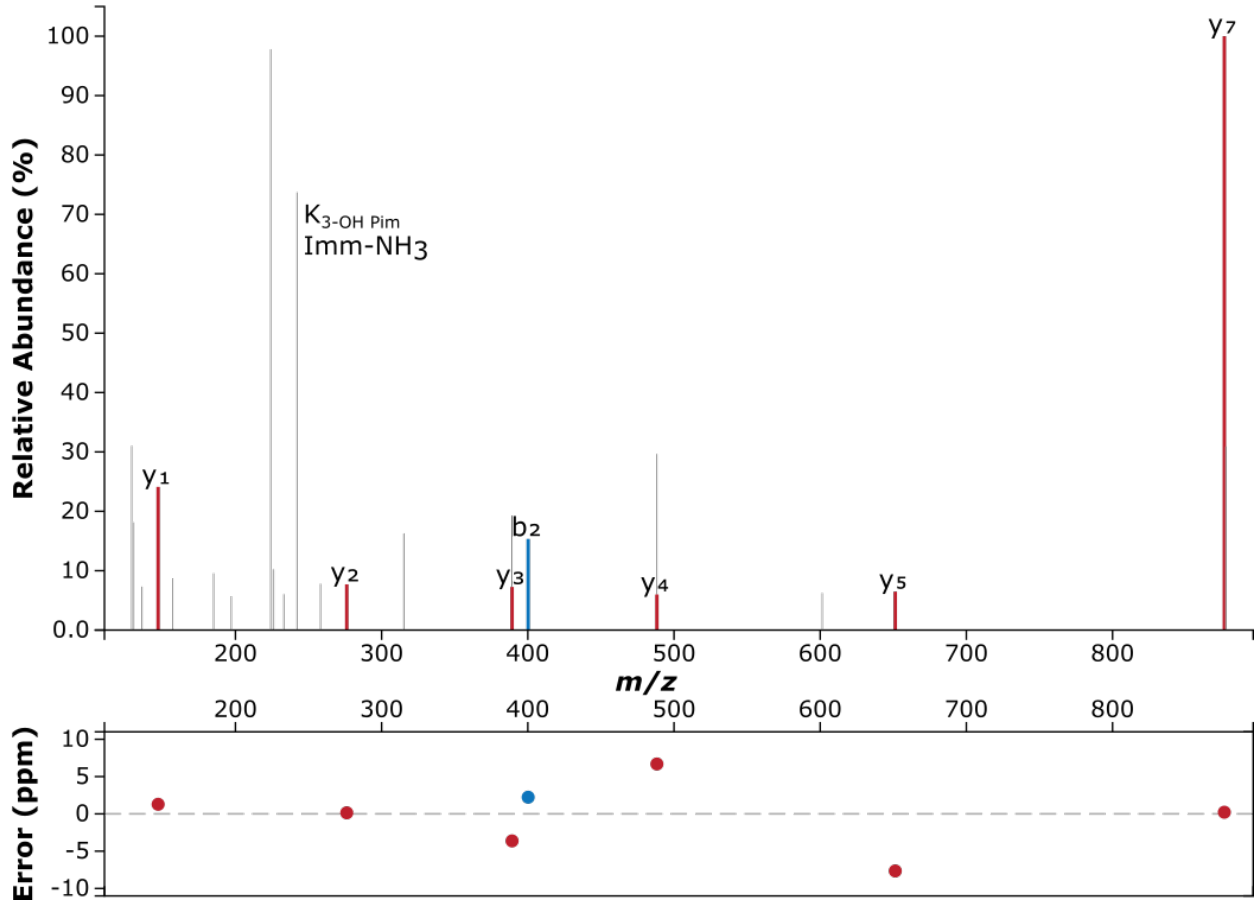

3-OH Pimelyl  
k D A D V A L K

Precursor m/z: 509.2768 Charge: +2  
Acetyl-CoA synthetase (Q2LWR8)

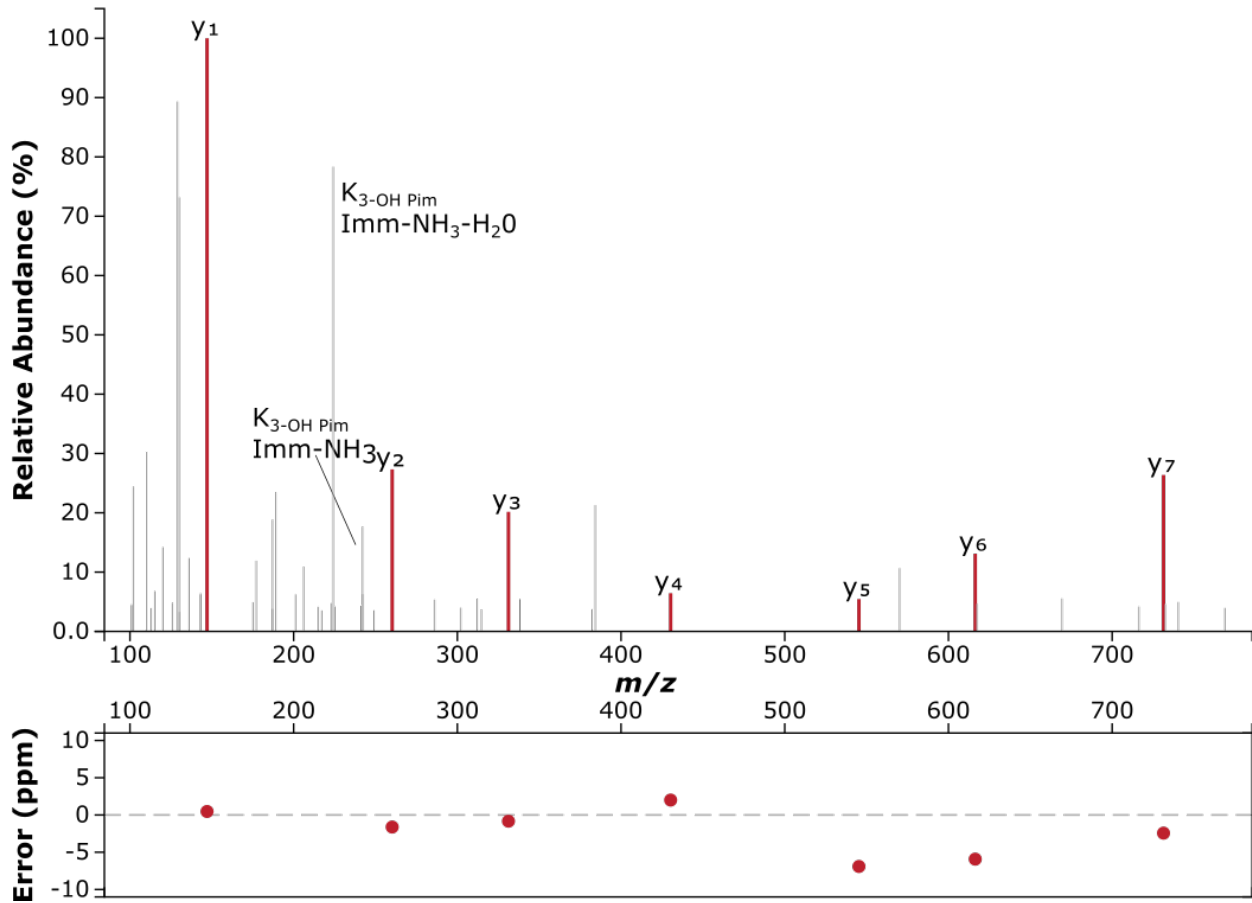

3-OH Pimelyl

k I T G K D T I D F I K

Precursor m/z: 512.9555

Charge: +3

6-oxocyclohex-1-ene-1-carbonyl-CoA hydrolase (Q2LXU2)

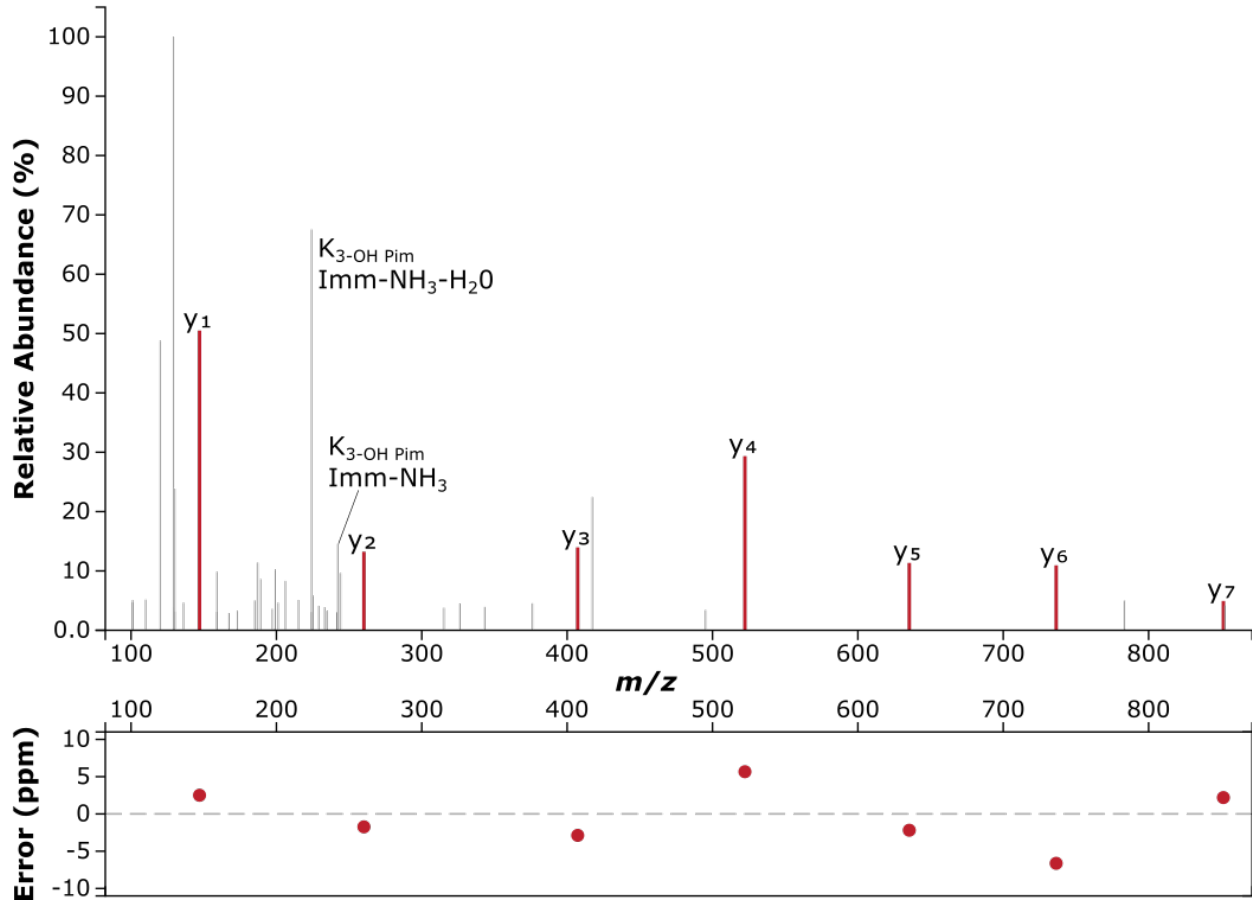

3-OH Pimelyl

k I V D I A R

Precursor m/z: 486.7898

Charge: +2

Aspartate aminotransferase (Q2LWK1)

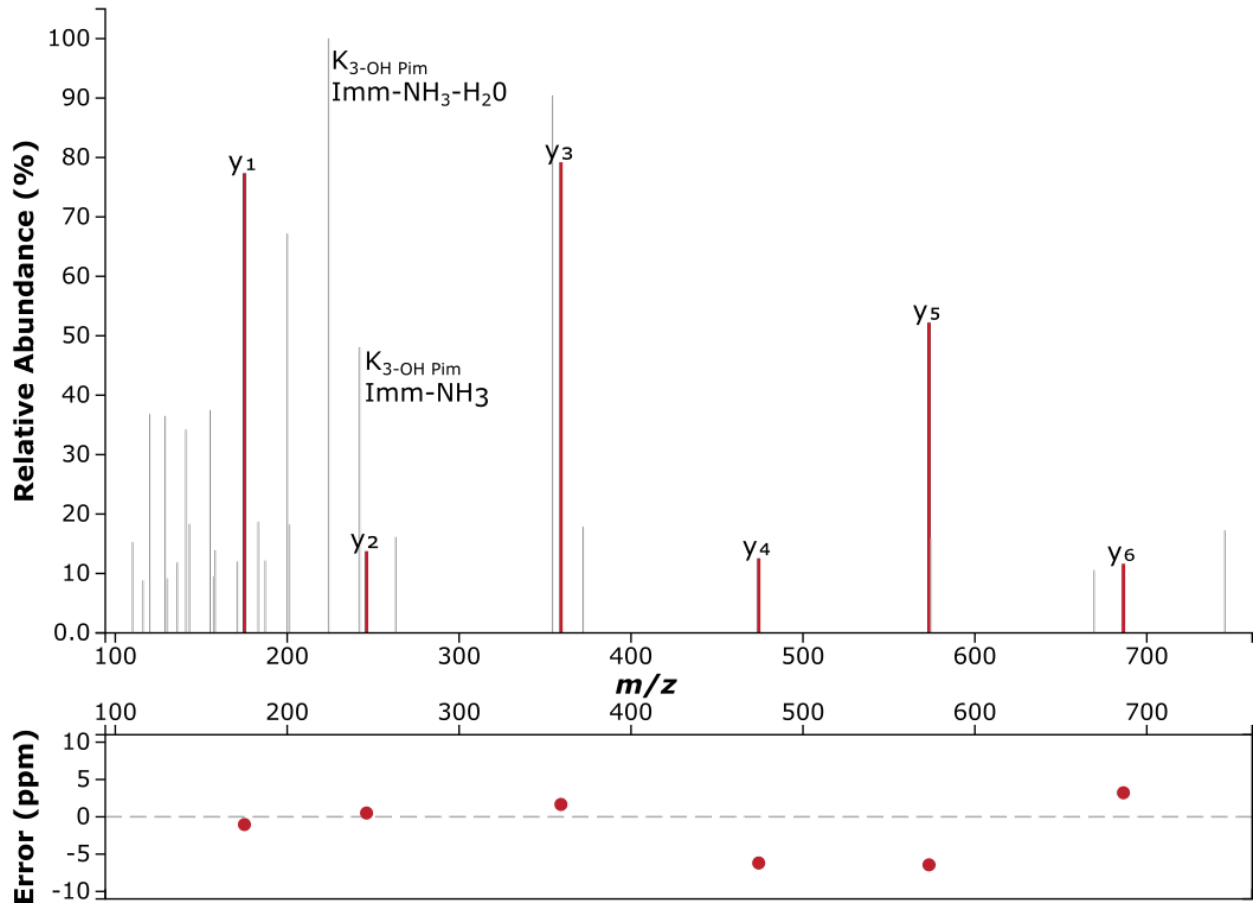

L P E Q H <sup>3-OH Pimelyl</sup> k F Y A N R

Precursor m/z: 520.9317

Charge: +3

Glutaconyl-CoA decarboxylase A subunit (Q2LUY7)

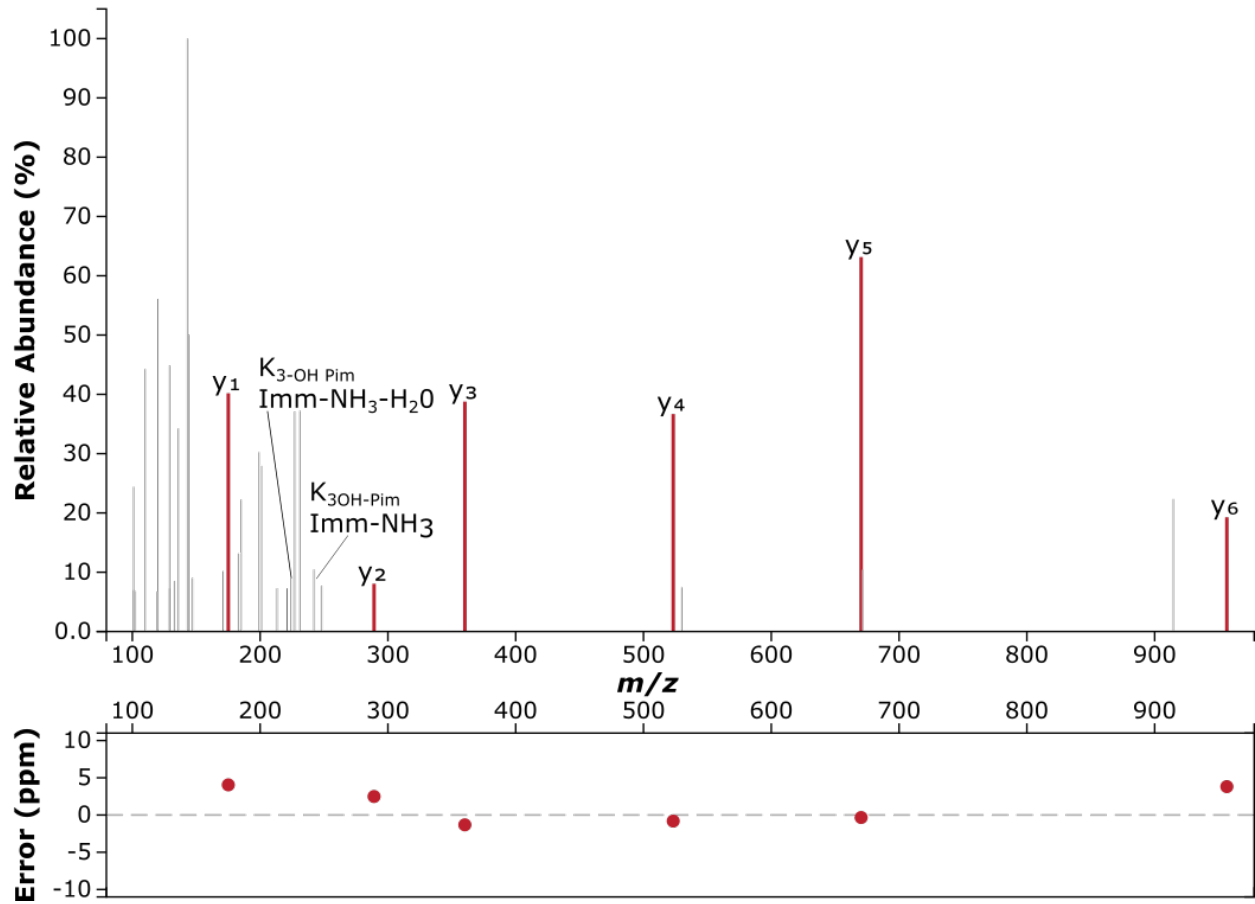

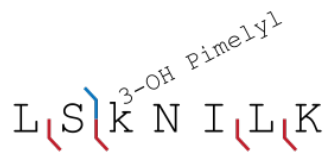

Precursor m/z: 487.3000

Charge: +2

Acetyl-CoA synthetase beta subunit (Q2LVF9)

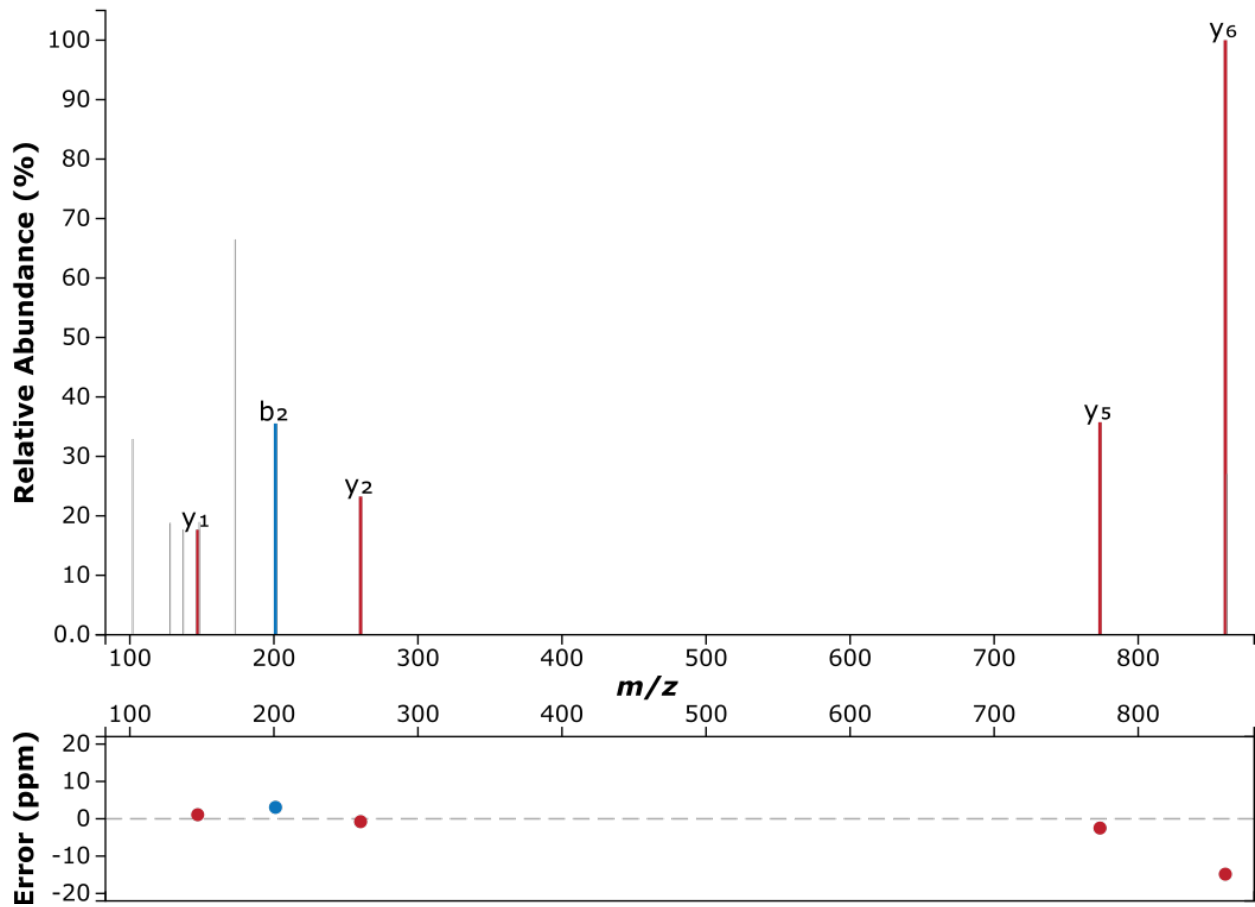

Q G F A P S P E L E k E L K <sup>3-OH Pimelyl</sup>

Precursor m/z: 865.9460

Charge: +2

4-hydroxybenzoate-CoA ligase / benzoate-CoA ligase (Q2LRH7)

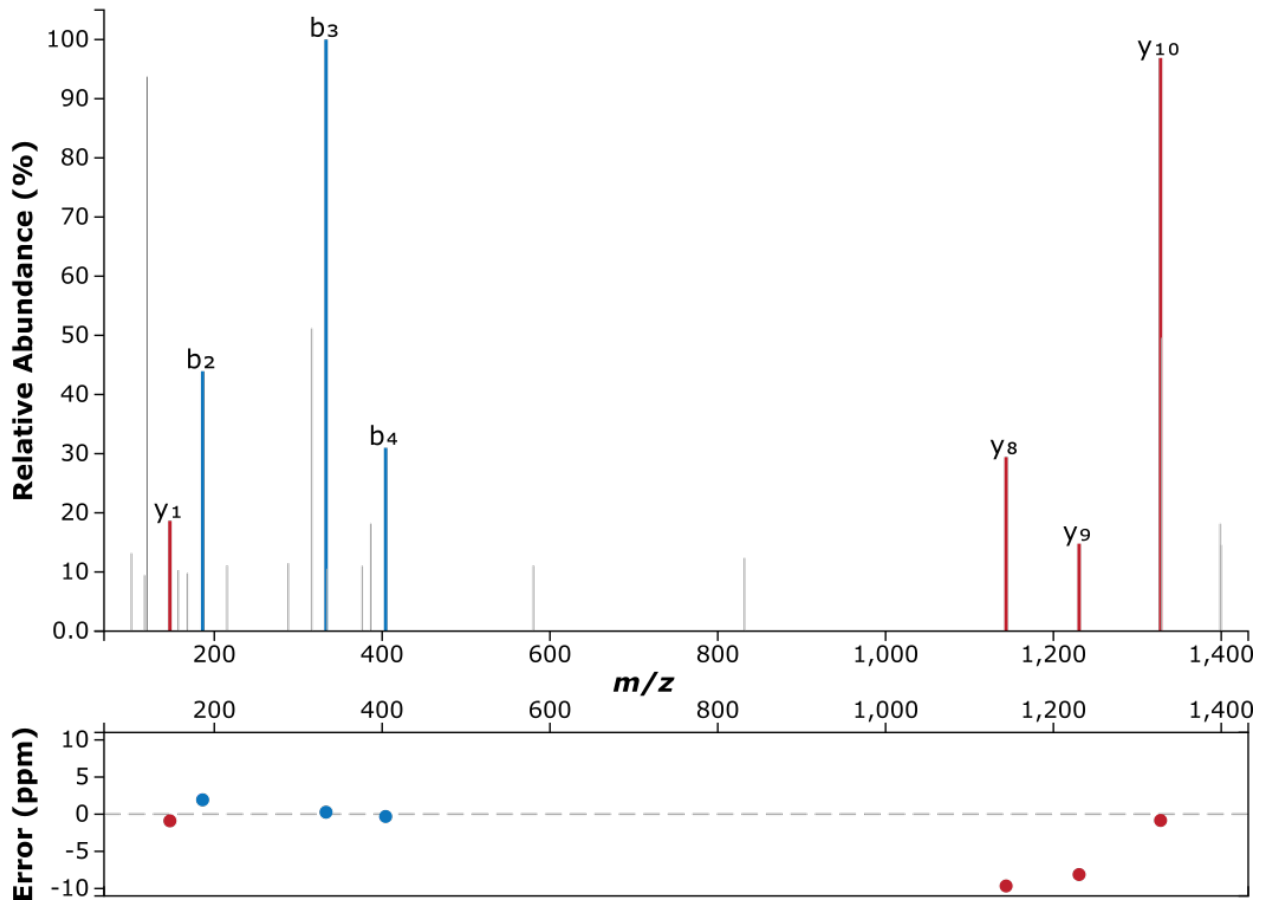

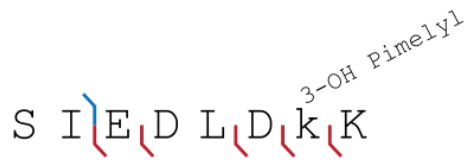

Precursor m/z: 553.2848 Charge: +2  
 Phosphoglycerate mutase (Q2LTT8)

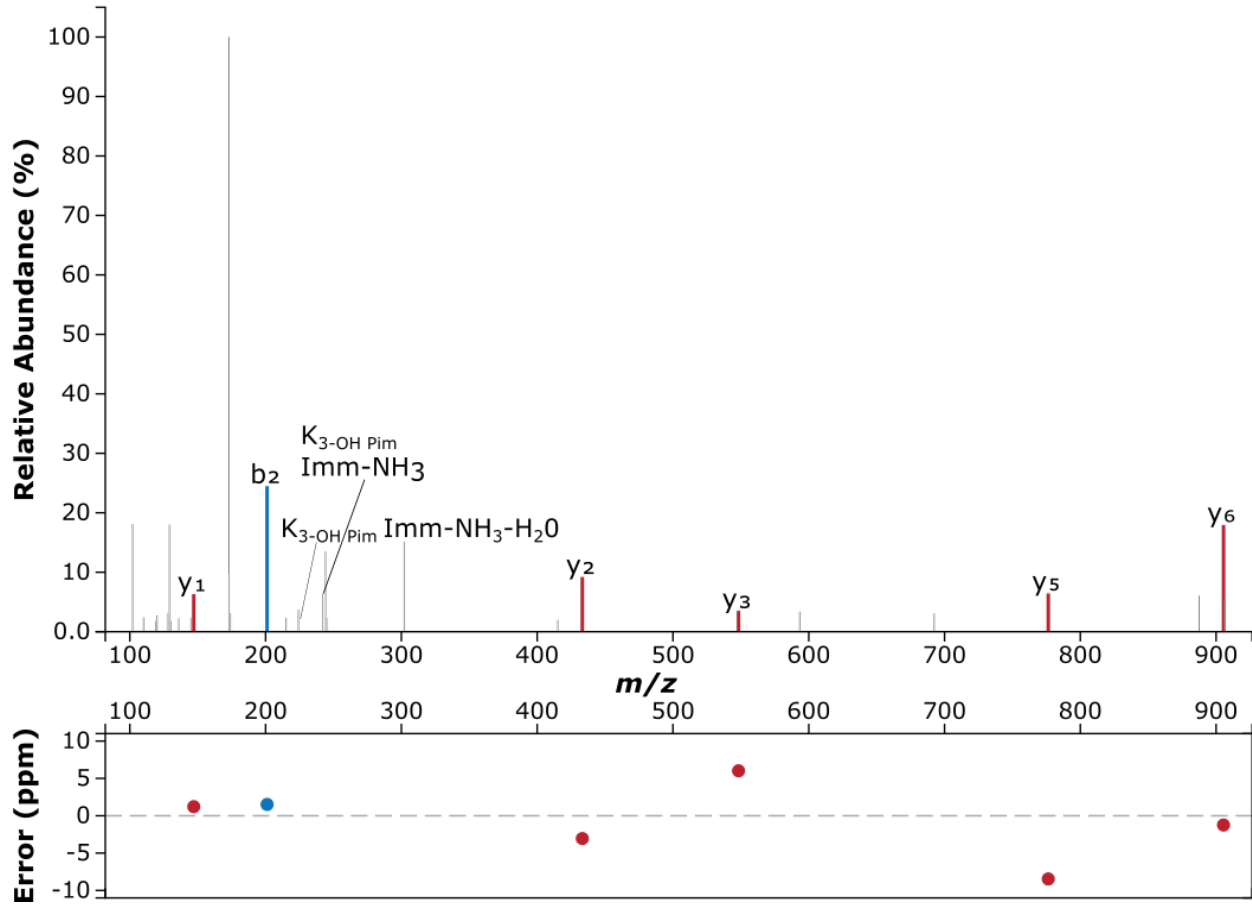



3-OH Pimelyl

S S P T G E I Y L D N V k V P K

Precursor m/z: 952.9962 Charge: +2  
Acyl-CoA dehydrogenase, short-chain specific (Q2LUY8)

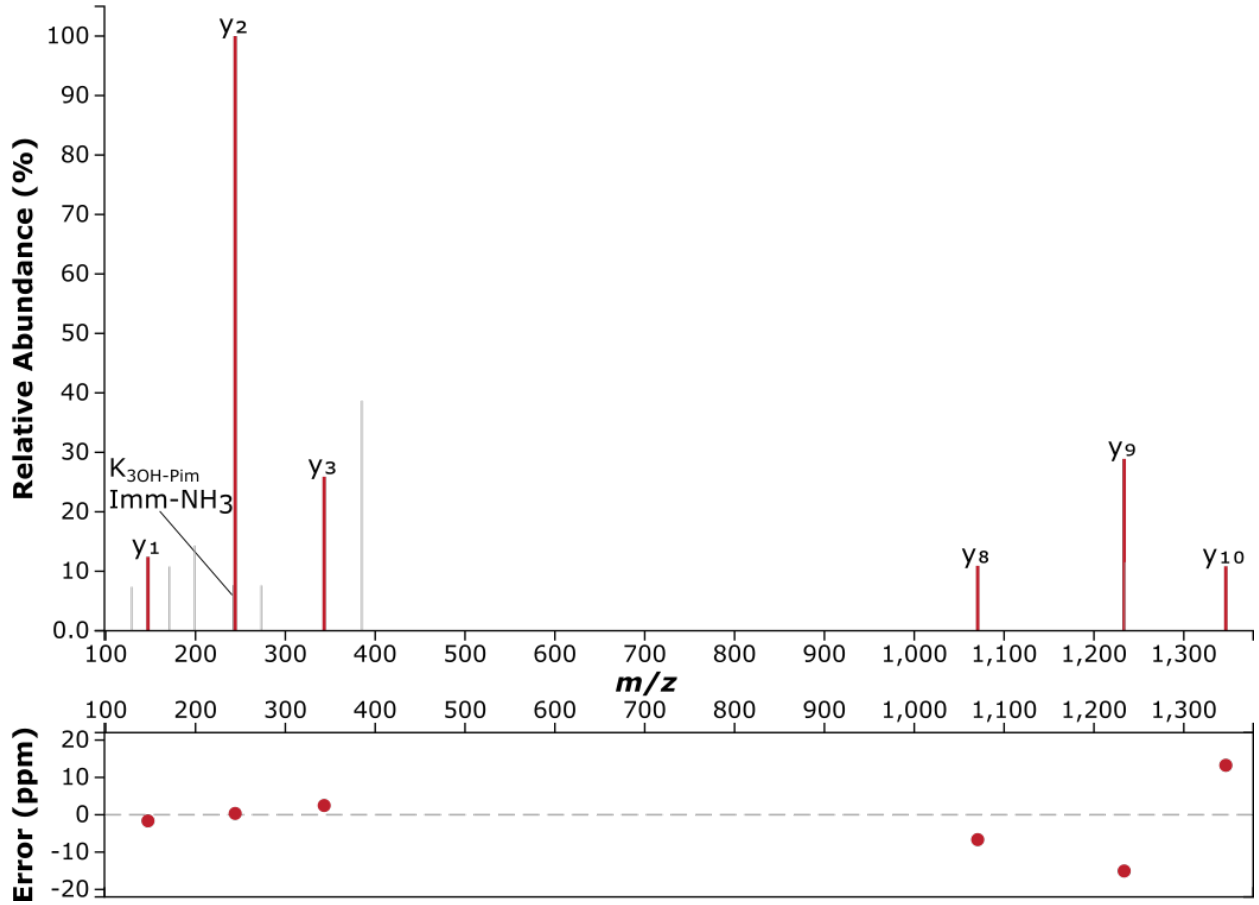

T A A A L E A L E k R <sup>3-OH Pimelyl</sup>

Precursor m/z: 665.8643

Charge: +2

Polyribonucleotide nucleotidyltransferase (Q2LWT4)

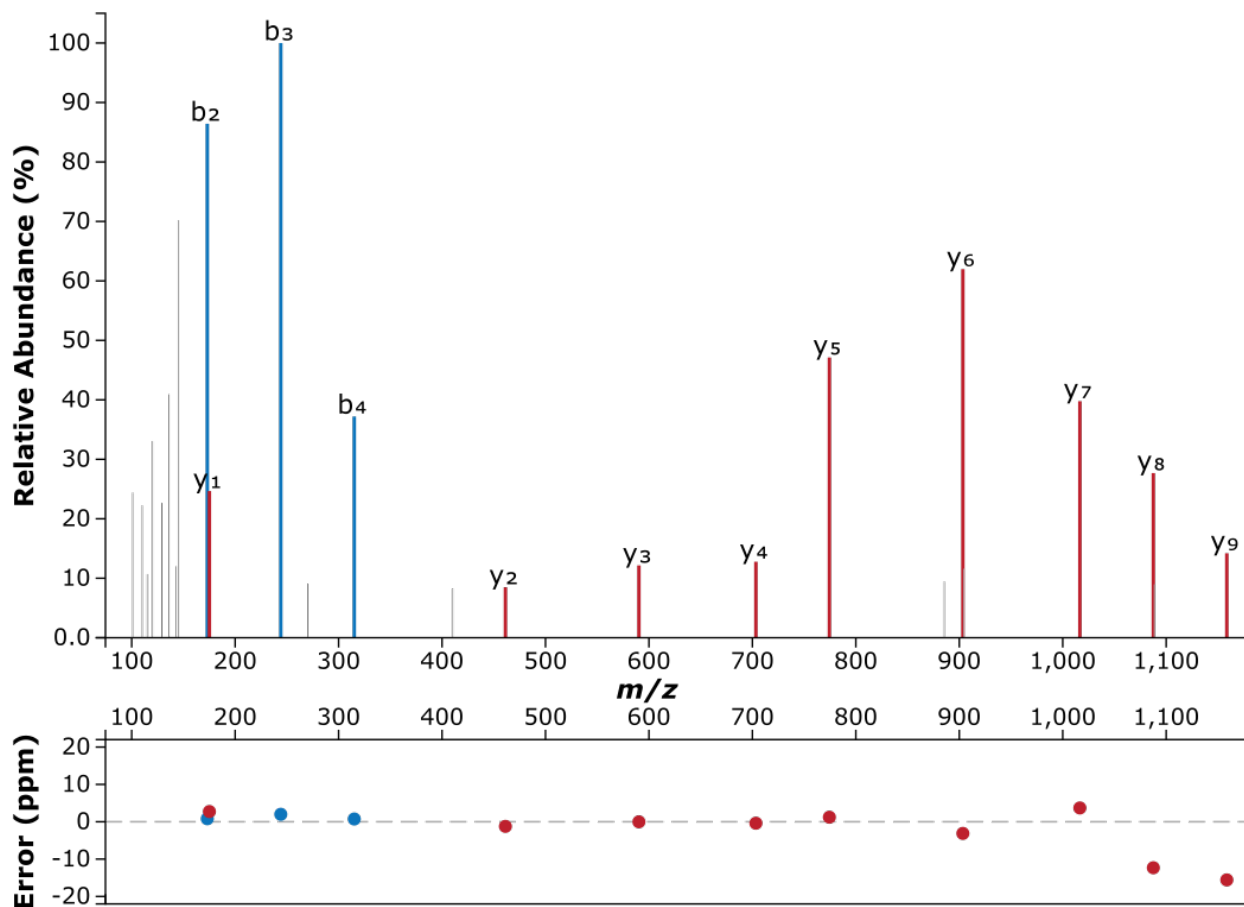

T A E A A k T H G Q A K  
<sup>3-OH pimelyl</sup>

Precursor m/z: 457.5685

Charge: +3

Putative K(+)-stimulated pyrophosphate-energized sodium pump (Q2LUL1)

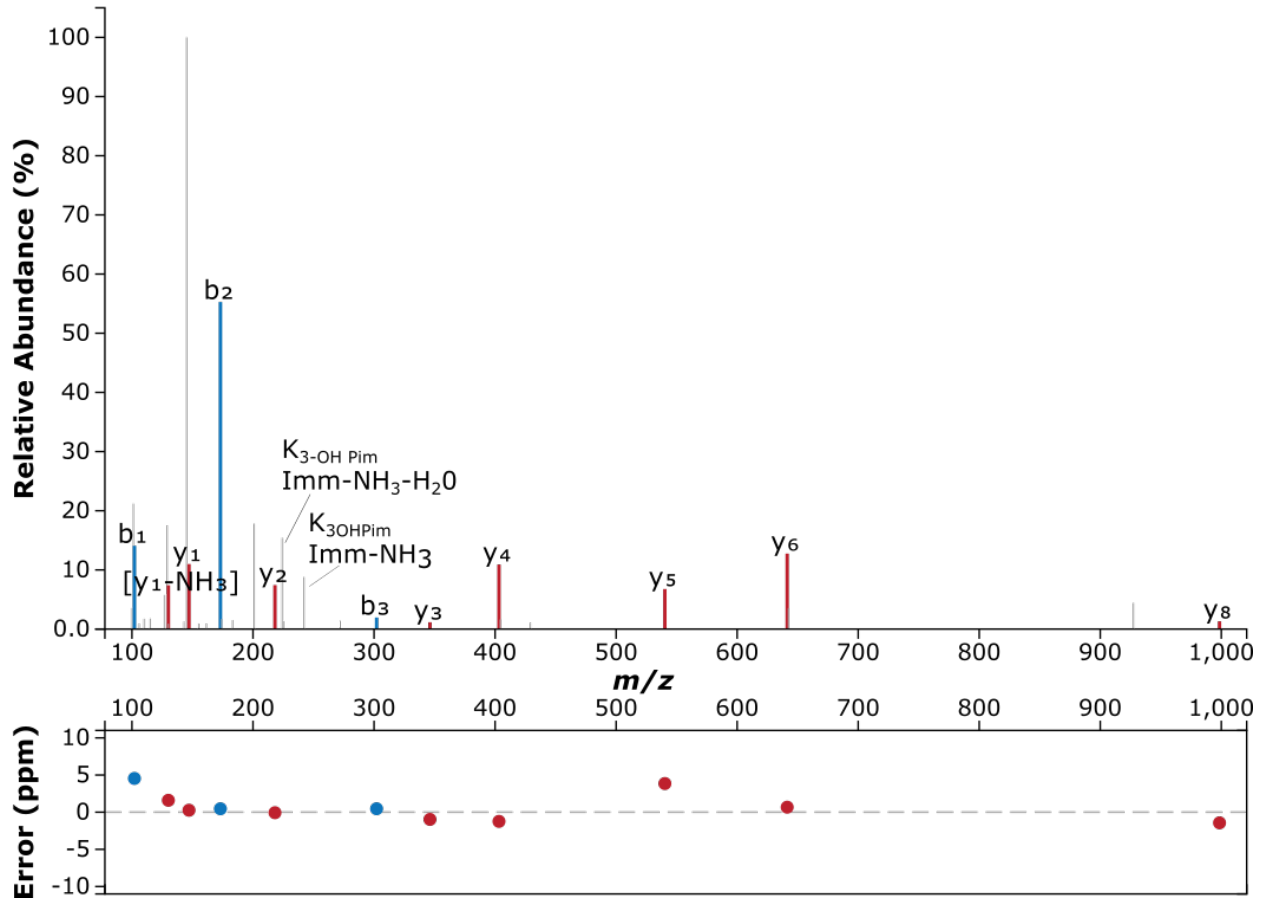

T A V G A F G G S L k G V R <sup>3-OH Pimelyl</sup>

Precursor m/z: 739.4041 Charge: +2  
 Acetyl-CoA acetyltransferase (Q2LWQ5)

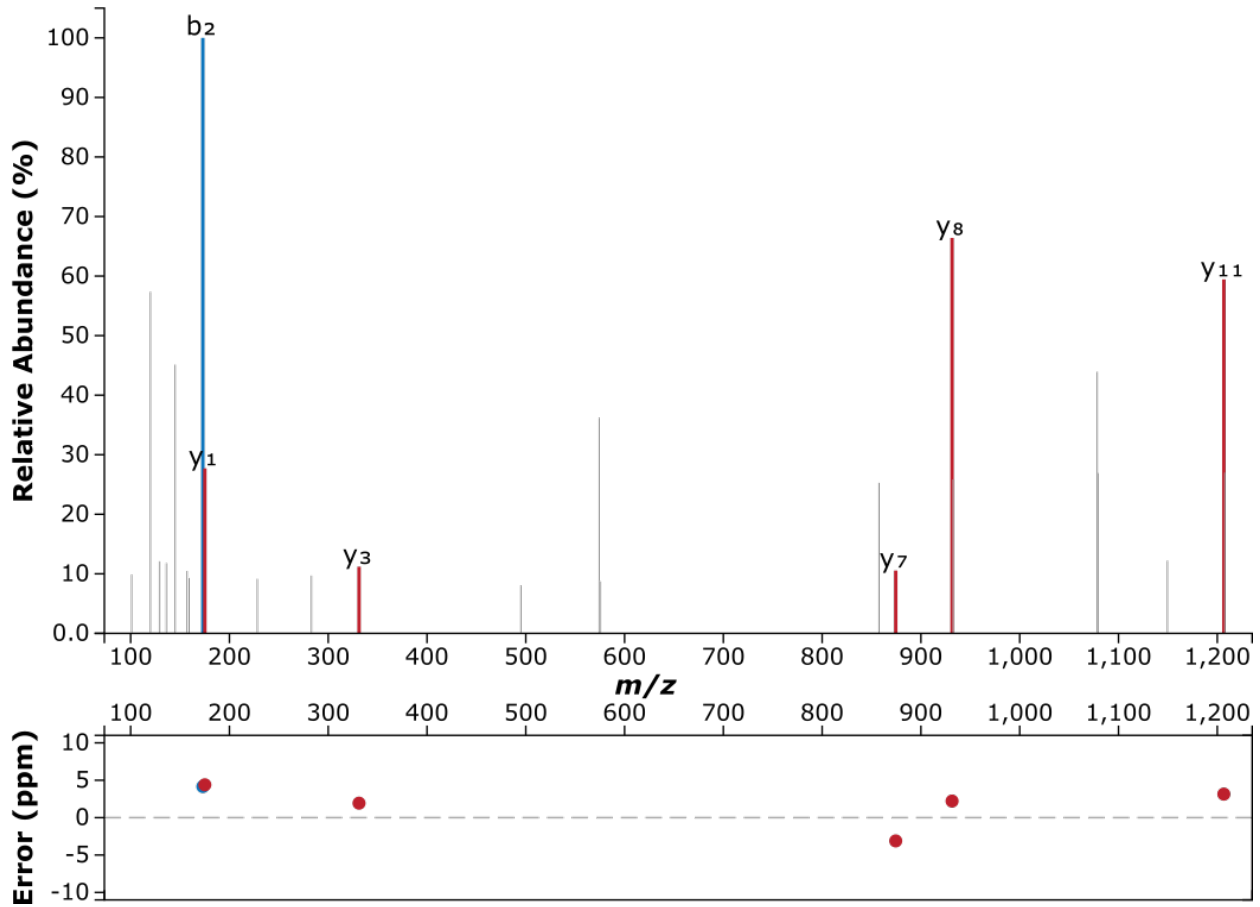

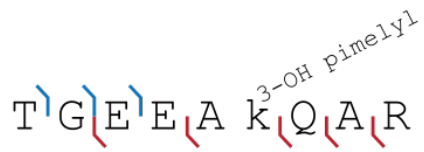

Precursor m/z: 574.2831 Charge: +2  
 6-oxocyclohex-1-ene-1-carbonyl-CoA hydrolase (Q2LXU2)

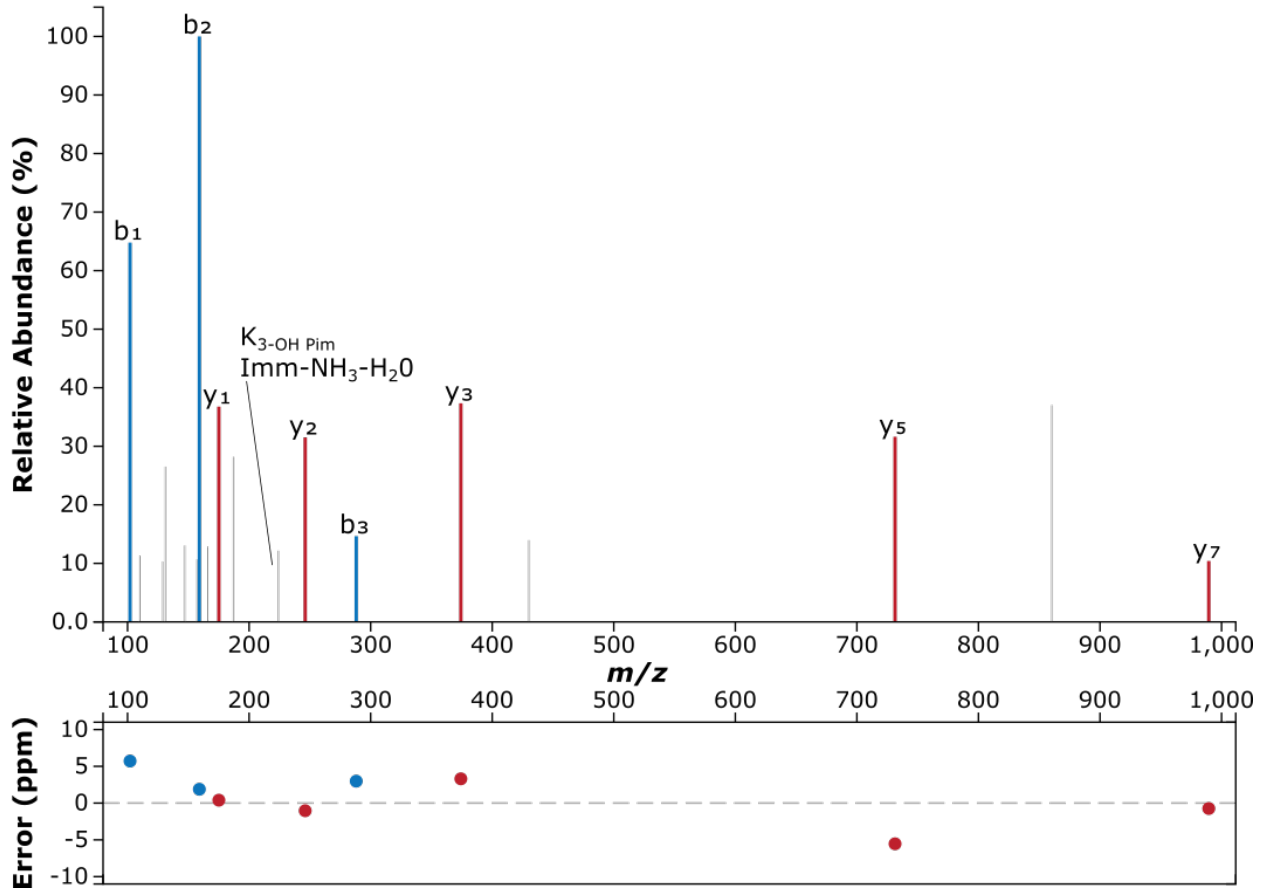

V T A E k D P A N L K  
<sup>3-OH Pimelyl</sup>

Precursor m/z: 672.3563

Charge: +2

Glyceraldehyde-3-phosphate dehydrogenase (Q2LWW2)

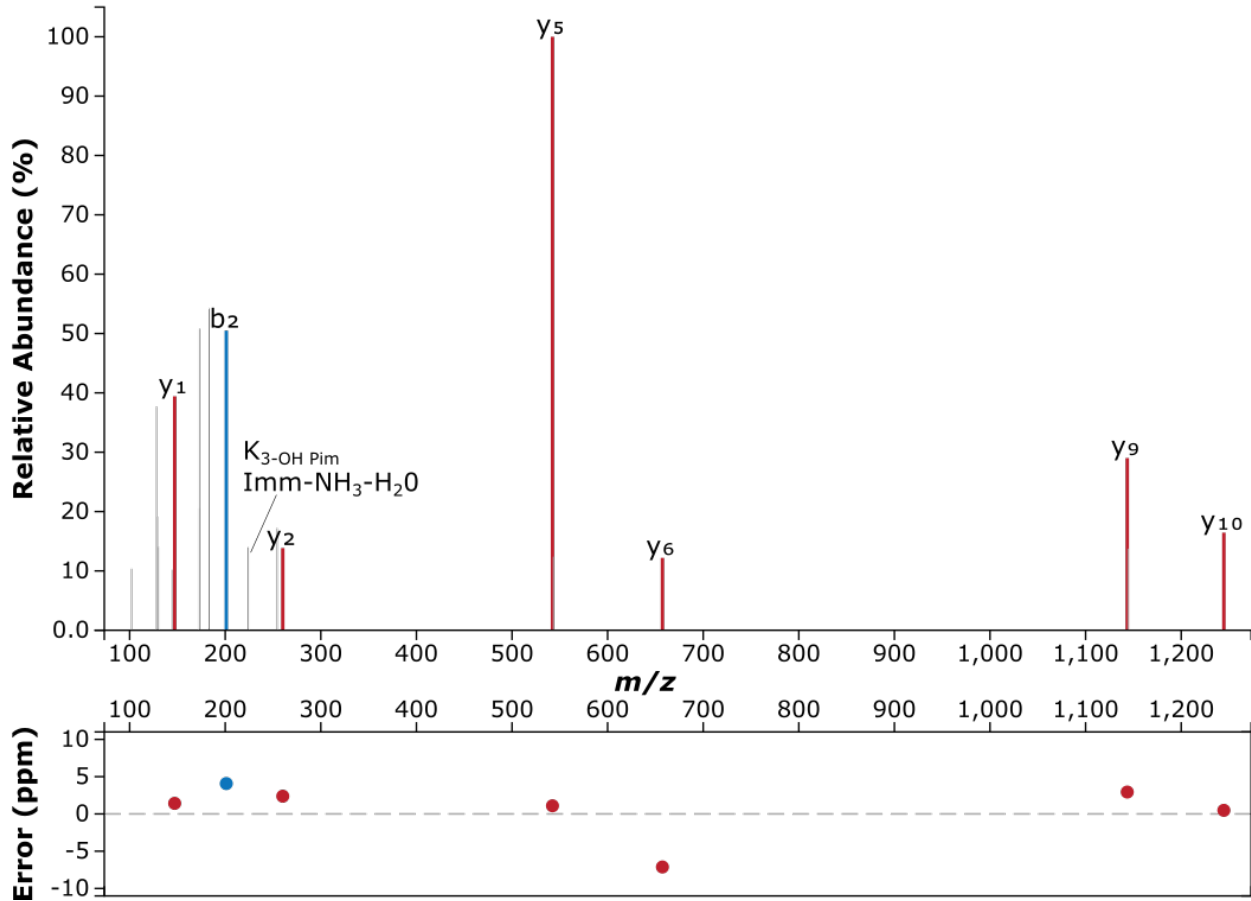

Supplement: mmc3.pdf [file mmc3.pdf]
