# Supplementary material for: The Acyl-Proteome of Syntrophus aciditrophicus Reveals Metabolic Relationships in Benzoate Degradation
Source: PubMed Central journal article supplement — Mol Cell Proteomics. 2022 Feb 19;21(4):100215. doi: 10.1016/j.mcpro.2022.100215 (PMC8942843; doi:10.1016/j.mcpro.2022.100215), 2022-02-19

Spot #19. SYN\_02898/SYN\_02896

TATGK(Acetyl)IQR

Precursor m/z: 458.77, Charge: 2+

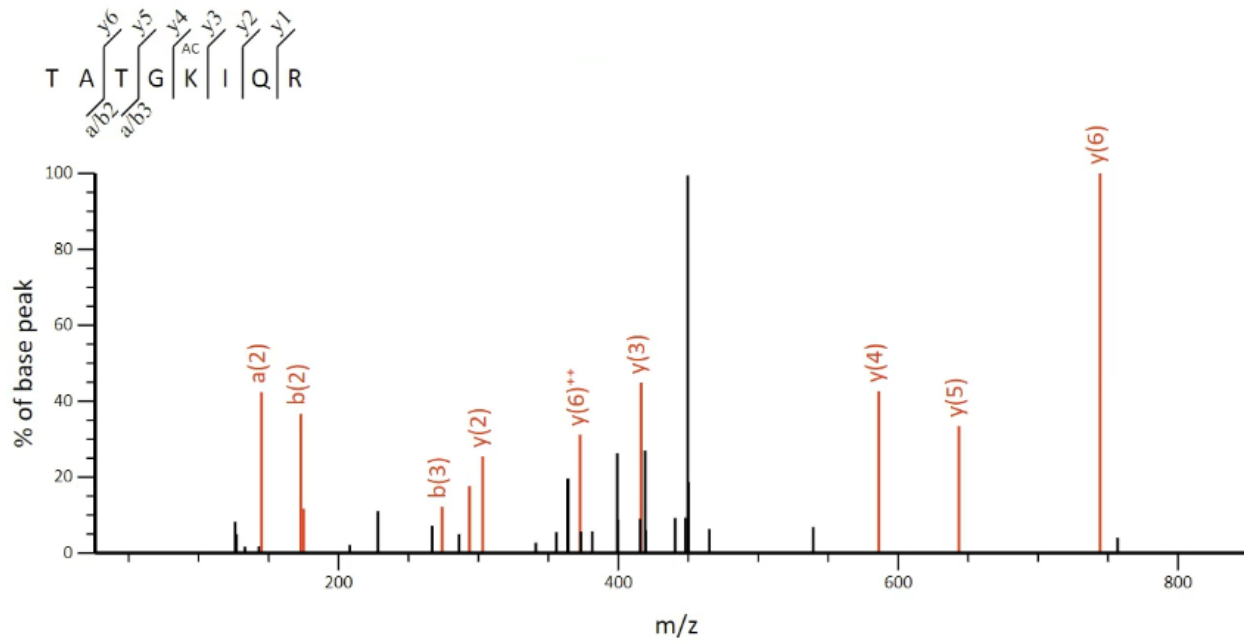

Spot #20. SYN\_01681  
YGTK(Acetyl)PEDLALIR

Precursor m/z: 709.31, Charge: 2+

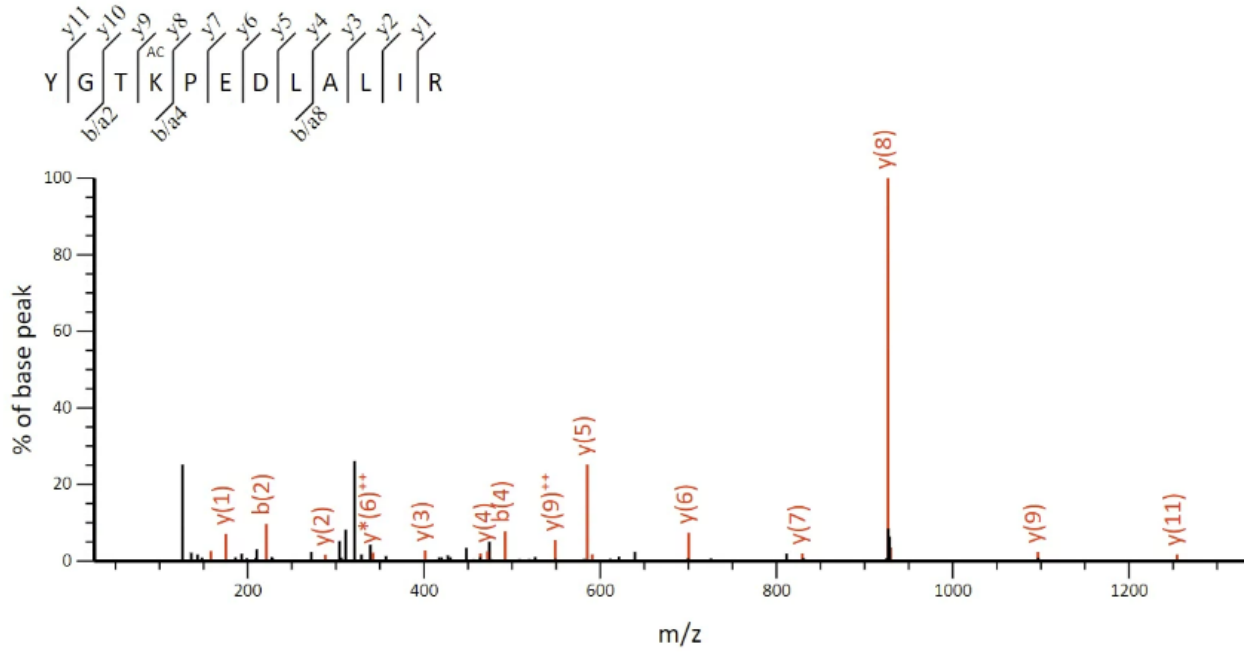

Spot #21. SYN\_02642

TAVGAFGGSLK(Acetyl)GVR

Precursor m/z: 681.31, Charge: 2+

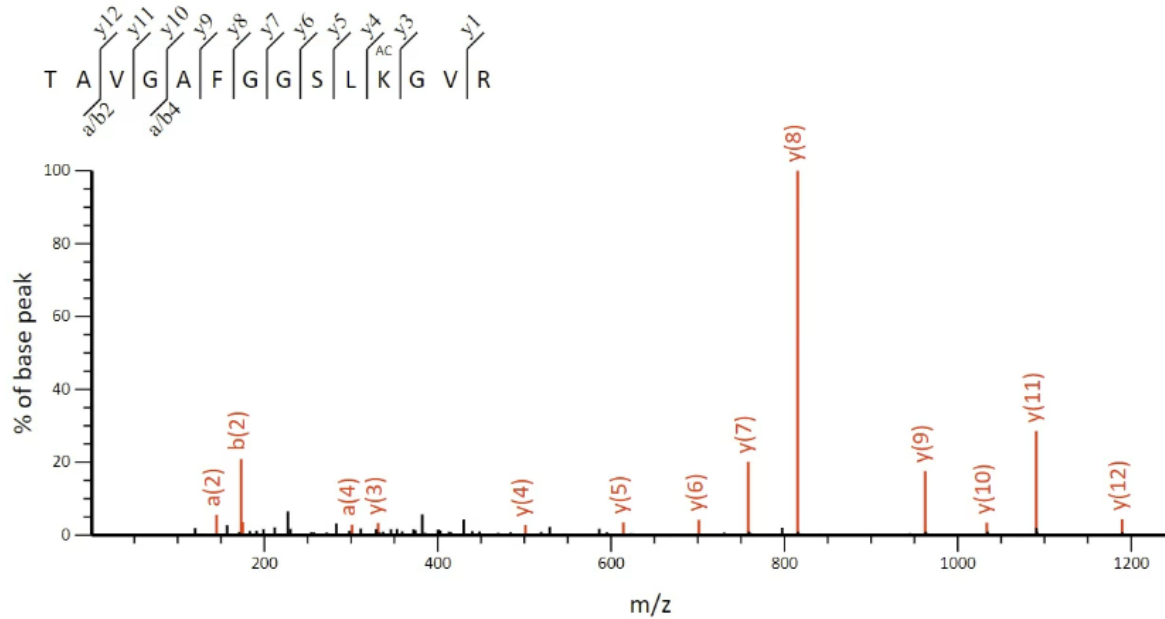

M(Ox)AK(Acetyl)LAPVFK

Precursor m/z: 531.73, Charge: 2+

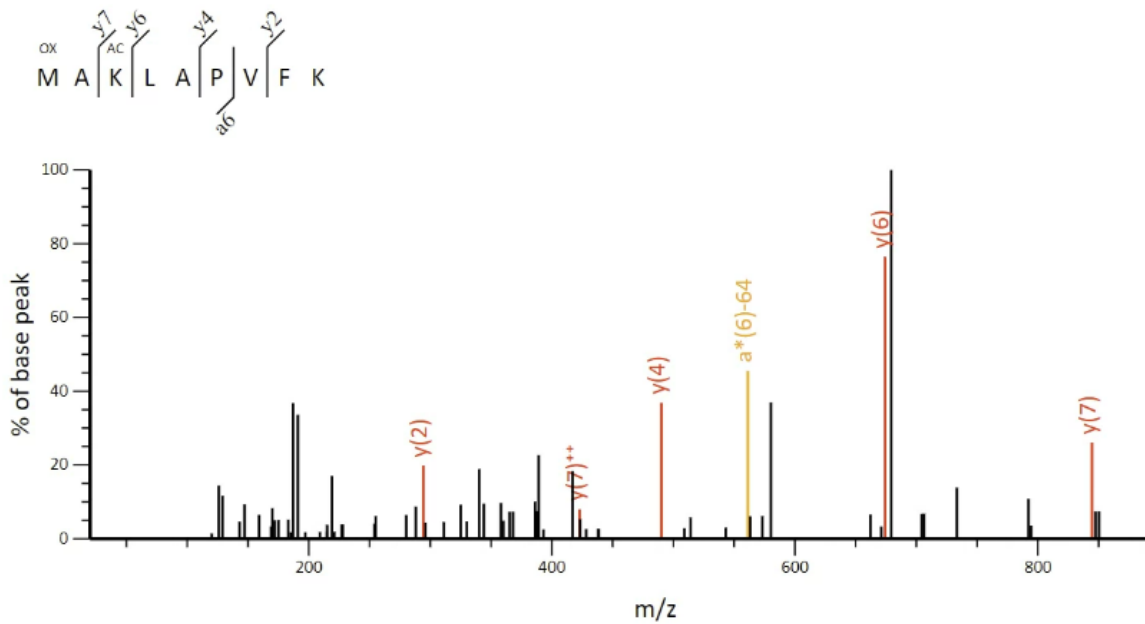

Spot #22. SYN\_01310

LM(Ox)AGSIK(Acetyl)K

Precursor m/z: 453.21, Charge: 2+

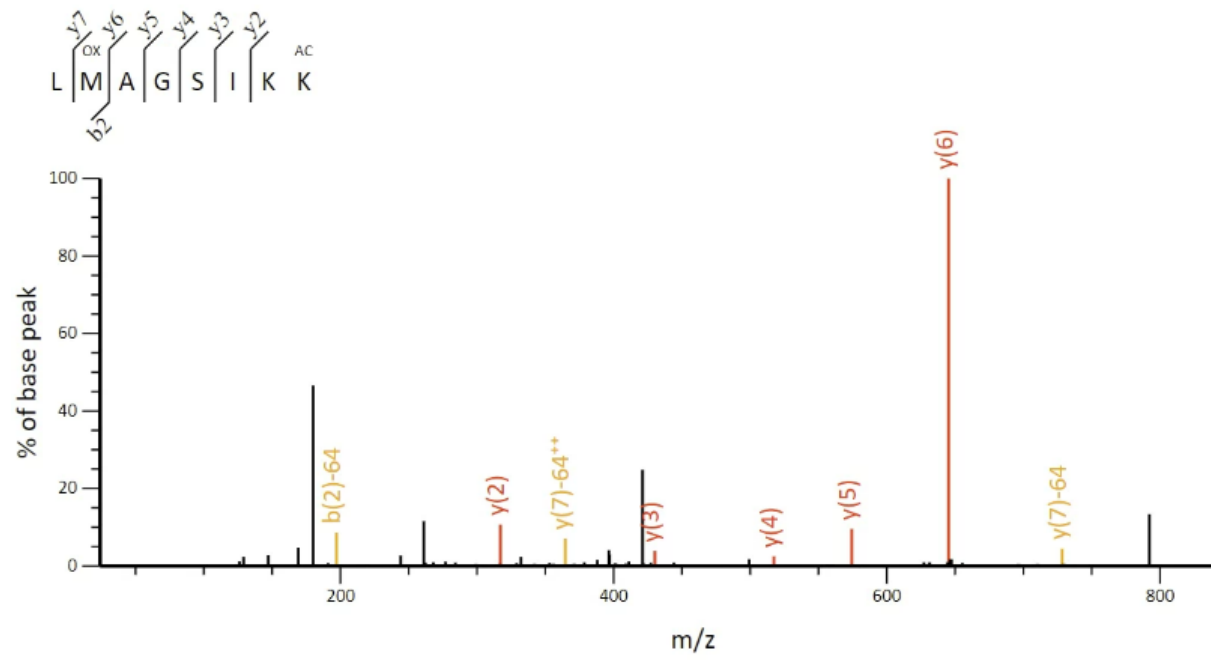

ATEFSK(Acetyl)QLGK

Precursor m/z: 640.27, Charge: 2+

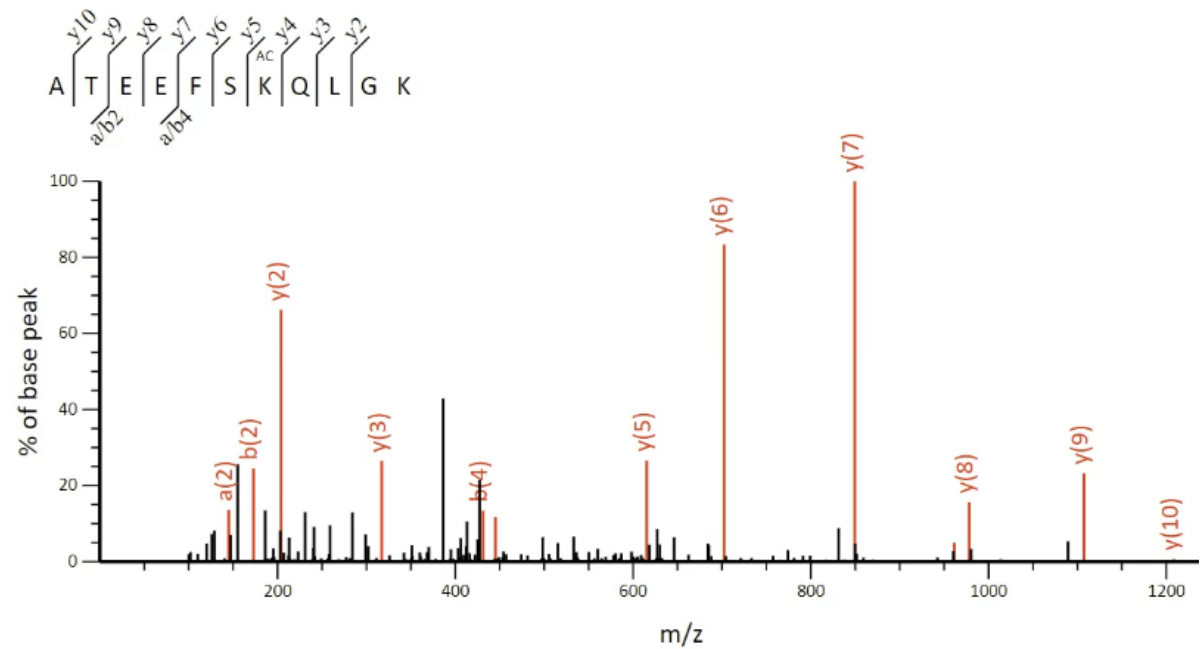

Spot #23. SYN\_01780

TAAALEALEK(Acetyl)R

Precursor m/z: 607.86, Charge: 2+

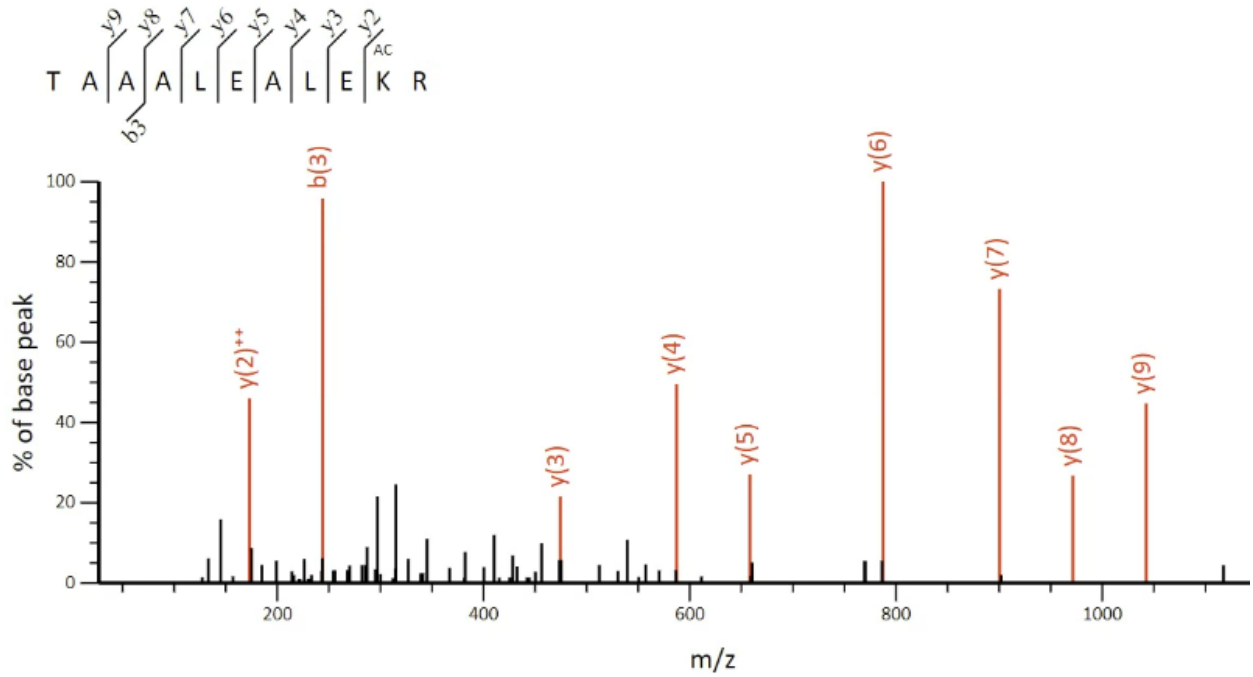

Spot # 23. SYN\_02636

YASLPGIM(Ox)K(Acetyl)AK

Precursor m/z: 607.86, Charge: 2+

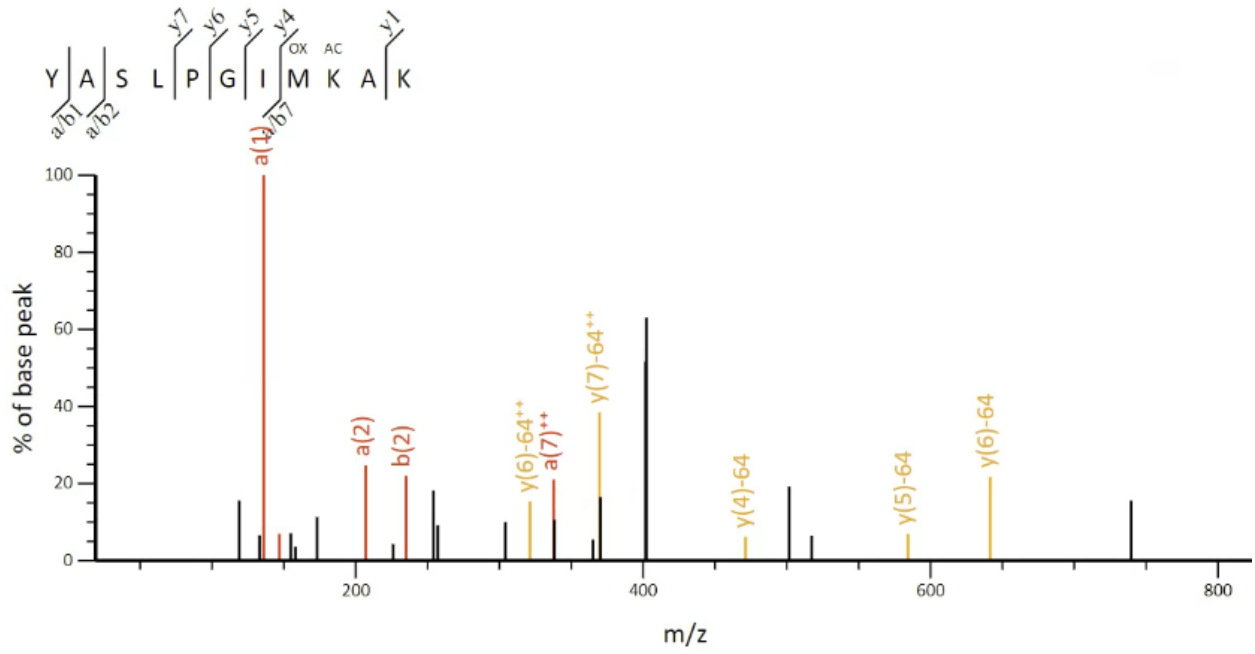

Supplement: mmc2.pdf [file mmc2.pdf]
